# Supplementary material for: 5-Nitroisoxazoles in SNAr reactions: access to polysubstituted isoxazole derivatives
Source: Royal Society of Chemistry journal article supplement (doi:10.1039/d1ob00816a), 2021-01-01

## 5-NITROISOXAZOLES IN $S_NAR$ REACTIONS: ACCESS TO POLYSUBSTITUTED ISOXAZOLE DERIVATIVES

Dmitry A. Vasilenko,<sup>†</sup> Sevastian E. Dronov,<sup>†</sup> Dzianis U. Parfiryeu,<sup>†</sup> Kirill S. Sadovnikov,<sup>†</sup>

Kseniya N. Sedenkova,<sup>†,‡</sup> Yuri K. Grishin,<sup>†</sup> Victor B. Rybakov,<sup>†</sup> Tamara S. Kuznetsova,<sup>†</sup>

Elena B. Averina,<sup>\* †,‡</sup>

<sup>†</sup>*Lomonosov Moscow State University, Department of Chemistry, Leninskie Gory, 1-3, Moscow  
119991, Russia*

<sup>‡</sup>*IPhAC RAS, Severnyi Proezd, 1, Chernogolovka, Moscow Region, 142432, Russia*

[elaver@org.chem.msu.ru](mailto:elaver@org.chem.msu.ru)

### SUPPORTING INFORMATION

#### TABLE OF CONTENTS

|                                                 |    |
|-------------------------------------------------|----|
| 1. General Information.....                     | 2  |
| 2. Experimental Procedures.....                 | 2  |
| 3. X-ray Diffraction Analysis.....              | 14 |
| 4. DFT Studies .....                            | 17 |
| 4.1. Computational Details.....                 | 17 |
| 4.2. The FMOs and Natural Atomic Charge .....   | 18 |
| 4.3. Conformational analysis of morpholine..... | 19 |
| 4.4. Cartesian Coordinates .....                | 20 |
| 5. References.....                              | 31 |
| 6. Copies of NMR Spectra.....                   | 32 |

## 1. General Information.

NMR spectra were recorded on spectrometer Agilent 400-MR (400.0 MHz for  $^1\text{H}$ ; 100.6 MHz for  $^{13}\text{C}$ , 162.0 MHz for  $^{31}\text{P}$ , 376.3 MHz for  $^{19}\text{F}$ ) at r. t.; the chemical shifts  $\delta$  were measured in ppm with respect to the  $\text{CDCl}_3$  ( $^1\text{H}$ :  $\delta = 7.26$  ppm,  $^{13}\text{C}$ :  $\delta = 77.16$  ppm),  $\text{H}_3\text{PO}_4$  as external standard for  $^{31}\text{P}$  and  $\text{CFCl}_3$  as external standard for  $^{19}\text{F}$ . Chemical shifts ( $\delta$ ) are given in ppm; J values are given in Hz. When necessary, assignments of signals in NMR spectra were made using 2D techniques. Accurate mass measurements (HRMS) were performed on a Bruker micrOTOF II instrument using electrospray ionization (ESI). The measurements were done in a positive ion mode (interface capillary voltage 4500 V) or in a negative ion mode (3200 V). Melting points (mp) are uncorrected. Analytical thin layer chromatography was carried out with Silufol silica gel plates (supported on aluminum); the detection was done by UV lamp (254 and 365 nm) and chemical staining (5% aqueous solution of  $\text{KMnO}_4$ ). Column chromatography was performed on silica gel (230–400 mesh, Merck).

5-Nitroisoxazoles **1a-e,h**<sup>1</sup> and **1f**<sup>2</sup> were synthesized by described methods.

All other starting materials were commercially available.

All reagents except commercial products of satisfactory quality were purified by literature procedures prior to use.

## 2. Experimental Procedures.

*Methyl 4-methyl-5-nitroisoxazole-3-carboxylate (1h)*. Triethylamine (0.56 mL, 0.40 g, 4 mmol) was added dropwise to a solution of tetranitromethane (0.6 mL, 0.98 g, 5 mmol) in 1,4-dioxane (4 mL) at 0 °C (ice bath). The reaction mixture was stirred for 5 min, and methyl crotonate (0.21 mL, 0.20 g, 2 mmol) in 1,4-dioxane (0.5 mL) was added dropwise. Then the cooling was removed, and the mixture was stirred at 70 °C for 2 h. The solvent was removed under reduced pressure, and the product was isolated by column chromatography. Yield: 0.26 g, 70%; colorless oil;  $R_f$  0.29 (petroleum ether:EtOAc = 10:1)  $^1\text{H}$  NMR (400 MHz,  $\text{CDCl}_3$ ):  $\delta$  2.60 (s, 3H,  $\text{CH}_3$ ), 4.02 (s, 3H,  $\text{CH}_3\text{O}$ );  $^{13}\text{C}$  NMR (100 MHz,  $\text{CDCl}_3$ ):  $\delta$  8.7 ( $\text{CH}_3$ ), 53.5 ( $\text{CH}_3\text{O}$ ), 115.8 (C), 157.1 (C), 159.1 (C), 162.2 (C- $\text{NO}_2$ ). Anal. calcd. for  $\text{C}_6\text{H}_6\text{N}_2\text{O}_5$ : C, 38.72; H, 3.25; N, 15.05. Found: C, 38.70; H, 3.26; N, 15.12.

**General procedure 1.** Amine (0.4 mmol) was added to the solution of 5-nitroisoxazole **1** (0.2 mmol) in  $\text{CH}_3\text{CN}$  (2 mL) and the resulting mixture was stirred at r. t. for 24 h. Then the mixture was poured into  $\text{CH}_2\text{Cl}_2$  (30 mL) and it was washed sequentially with 10%  $\text{HCl}$  (2×15 mL), solution of  $\text{NaHCO}_3$  (15 mL) and brine (15 mL). The organic layer was

dried over anhydrous MgSO<sub>4</sub> and the solvent was evaporated under reduced pressure to give products **2** which required no additional purification.

**General procedure 2.** Nucleophile (0.2 mmol, in cases **2k,l,m** 0.1 mmol of nucleophiles are used) and DIPEA (0.2 mmol, 26 mg) were added to the solution of 5-nitroisoxazole **1** (0.2 mmol) in CH<sub>3</sub>CN (2 mL). The resulting mixture was stirred at r. t. for 24 h. The solvent was removed under reduced pressure, and the residue was partitioned between water (20 mL) and CH<sub>2</sub>Cl<sub>2</sub> (20 mL). The aqueous phase was extracted with CH<sub>2</sub>Cl<sub>2</sub> (3×10 mL), and the combined organic phases were dried over anhydrous MgSO<sub>4</sub> and concentrated under reduced pressure. The residue was purified by column chromatography to give the product **2**.

**General procedure 3.** DIPEA (0.2 mmol) was added to the solution of 5-nitroisoxazole **1** (0.2 mmol) in corresponding alcohol (2 mL). The resulting mixture was stirred at r. t. for 48–72 h (TLC-monitoring). After the reaction was finished, the solvent was removed under reduced pressure. The residue was dissolved in CH<sub>2</sub>Cl<sub>2</sub> (30 mL). The obtained solution was washed sequentially with 10% HCl (2×15 mL), solution of NaHCO<sub>3</sub> (15 mL) and brine (15 mL). The combined organic layers were dried over anhydrous MgSO<sub>4</sub> and concentrated under reduced pressure to give products **2** which required no additional purification.

*tert-Butyl 5-morpholinoisoxazole-3-carboxylate (2a).* **2a** was synthesized according to GPI starting from **1a** and morpholine. Yield: 49 mg, 96%; colorless solid; mp 118–119 °C; <sup>1</sup>H NMR (400 MHz, CDCl<sub>3</sub>): δ 1.56 (s, 9H, 3CH<sub>3</sub>), 3.29–3.34 (m, 4H, 2CH<sub>2</sub>), 3.75–3.81 (m, 4H, 2CH<sub>2</sub>), 5.37 (s, 1H, CH); <sup>13</sup>C NMR (100 MHz, CDCl<sub>3</sub>): δ 28.1 (3CH<sub>3</sub>), 46.7 (2CH<sub>2</sub>), 65.9 (2CH<sub>2</sub>), 79.4 (CH), 83.2 (C-O), 158.6 (C), 159.6 (C), 171.8 (C); HRMS (ESI) m/z [M+H]<sup>+</sup> calcd for C<sub>12</sub>H<sub>19</sub>N<sub>2</sub>O<sub>4</sub>: 255.1339; found: 255.1337.

*tert-Butyl 5-(butylamino)isoxazole-3-carboxylate (2b).* **2b** was synthesized according to GPI starting from **1a** and butylamine. Yield: 44 mg, 92%; light-yellow solid; mp 114–118 °C; <sup>1</sup>H NMR (400 MHz, CDCl<sub>3</sub>): δ 0.93 (t, <sup>3</sup>J = 7.3 Hz, 3H, CH<sub>3</sub>), 1.32–1.44 (m, 2H, CH<sub>2</sub>), 1.56–1.63 (m, 2H, CH<sub>2</sub>), 1.507 (s, 9H, 3CH<sub>3</sub>), 3.17 (dt, <sup>3</sup>J = 7.1 Hz, <sup>3</sup>J = 6.0 Hz, 2H, CH<sub>2</sub>), 4.70 (br. t, <sup>3</sup>J = 6.0 Hz, 1H, NH), 5.30 (s, 1H, CH); <sup>13</sup>C NMR (100 MHz, CDCl<sub>3</sub>): δ 13.8 (CH<sub>3</sub>), 20.0 (CH<sub>2</sub>), 28.2 (3CH<sub>3</sub>), 31.5 (CH<sub>2</sub>), 44.5 (CH<sub>2</sub>), 77.6 (CH), 83.1 (C-O), 158.6 (C), 159.9 (C), 171.1 (C); HRMS (ESI) m/z [M+H]<sup>+</sup> calcd for C<sub>12</sub>H<sub>21</sub>N<sub>2</sub>O<sub>3</sub>: 241.1547; found: 241.1552.

*tert-Butyl 5-(diethylamino)isoxazole-3-carboxylate (2c).* **2c** was synthesized according to GPI starting from **1a** and ethylamine. Yield: 45 mg, 94%; light-yellow oil; <sup>1</sup>H NMR (400 MHz, CDCl<sub>3</sub>): δ 1.18 (t, <sup>3</sup>J = 7.2 Hz, 6H, 2CH<sub>3</sub>), 1.57 (s, 9H, 3CH<sub>3</sub>), 3.33 (q, <sup>3</sup>J = 7.2 Hz,

4H, 2CH<sub>2</sub>), 5.19 (s, 1H, CH); <sup>13</sup>C NMR (100 MHz, CDCl<sub>3</sub>): δ 13.1 (2CH<sub>3</sub>), 28.1 (3CH<sub>3</sub>), 44.0 (2CH<sub>2</sub>), 76.8 (CH), 82.9 (C-O), 158.6 (C), 160.1 (C), 170.7 (C); HRMS (ESI) m/z [M+H]<sup>+</sup> calcd for C<sub>12</sub>H<sub>21</sub>N<sub>2</sub>O<sub>3</sub>: 241.1547; found: 241.1550.

*tert*-Butyl 5-piperidin-1-ylisoxazole-3-carboxylate (**2d**). **2d** was synthesized according to GP1 starting from **1a** and piperidine. Yield: 40 mg, 78%; Colorless oil; <sup>1</sup>H NMR (400 MHz, CDCl<sub>3</sub>): δ 1.56 (s, 9H, 3CH<sub>3</sub>), 1.59-1.66 (m, 6H, 3CH<sub>2</sub>), 3.28-3.34 (m, 4H, 2CH<sub>2</sub>), 5.29 (s, 1H, CH); <sup>13</sup>C NMR (100 MHz, CDCl<sub>3</sub>): δ 23.9 (CH<sub>2</sub>), 24.9 (2CH<sub>2</sub>), 28.1 (3CH<sub>3</sub>), 47.7 (2CH<sub>2</sub>), 78.5 (CH), 83.0 (C-O), 158.6 (C), 160.0 (C), 172.0 (C); HRMS (ESI) m/z [M+H]<sup>+</sup> calcd for C<sub>13</sub>H<sub>21</sub>N<sub>2</sub>O<sub>3</sub>: 253.1547; found: 253.1544.

*tert*-Butyl 5-(benzylamino)isoxazole-3-carboxylate (**2e**). **2e** was synthesized according to GP1 starting from **1a** and benzylamine. Yield: 52 mg, 95%; white solid; mp 177–180 °C; <sup>1</sup>H NMR (400 MHz, CDCl<sub>3</sub>): δ 1.57 (s, 9H, 3CH<sub>3</sub>), 4.38 (d, <sup>3</sup>J = 5.9 Hz, 2H, CH<sub>2</sub>), 5.12 (br.t, <sup>3</sup>J = 5.9 Hz, 1H, NH), 5.34 (s, 1H, CH), 7.27–7.39 (m, 5H, 5CH(Ar)); <sup>13</sup>C NMR (100 MHz, CDCl<sub>3</sub>): δ 28.1 (3CH<sub>3</sub>), 48.6 (CH<sub>2</sub>), 78.5 (CH), 83.2 (C-O), 127.5 (2CH(Ar)), 128.1 (CH(Ar)), 129.0 (2CH(Ar)), 137.2 (C(Ar)), 158.6 (C), 159.8 (C), 170.8 (C); HRMS (ESI) m/z [M+Na]<sup>+</sup> calcd for C<sub>15</sub>H<sub>18</sub>NaN<sub>2</sub>O<sub>3</sub>: 297.1210; found: 297.1208.

*tert*-Butyl 5-phenoxyisoxazole-3-carboxylate (**2g**). **2g** was synthesized according to GP2 starting from **1a** and phenol. Yield: 49 mg, 94%; white solid; mp 51–52 °C; R<sub>f</sub> 0.38 (petroleum ether:EtOAc = 10:1) <sup>1</sup>H NMR (400 MHz, CDCl<sub>3</sub>): δ 1.58 (s, 9H, 3CH<sub>3</sub>), 5.60 (s, 1H, CH), 7.17–7.22 (m, 2H, 2CH(Ar)), 7.25–7.31 (m, 1H, CH(Ar)), 7.39–7.45 (m, 2H, 2CH(Ar)); <sup>13</sup>C NMR (100 MHz, CDCl<sub>3</sub>): δ 28.1 (3CH<sub>3</sub>), 82.2 (CH), 83.8 (C-O), 119.2 (2CH(Ar)), 126.5 (CH(Ar)), 130.4 (2CH(Ar)), 154.4 (C(Ar)), 158.9 (C), 159.2 (C), 173.1 (C); HRMS (ESI) m/z [M+H]<sup>+</sup> calcd for C<sub>14</sub>H<sub>16</sub>NO<sub>4</sub>: 262.1074; found: 262.1077.

*tert*-Butyl 5-(3-aminophenoxy)isoxazole-3-carboxylate (**2h**). **2h** was synthesized according to GP2 starting from **1a** and 3-aminophenol. Yield: 40 mg, 72%; light-yellow solid; mp 110–112 °C; R<sub>f</sub> 0.18 (petroleum ether:EtOAc = 4:1) <sup>1</sup>H NMR (400 MHz, CDCl<sub>3</sub>): δ 1.58 (s, 9H, 3CH<sub>3</sub>), 3.84 (br.s, 2H, NH<sub>2</sub>), 5.62 (s, 1H, CH), 6.46–6.50 (m, 1H, CH(Ar)), 6.52–6.58 (m, 2H, 2CH(Ar)), 7.12–7.18 (m, 1H, CH(Ar)); <sup>13</sup>C NMR (100 MHz, CDCl<sub>3</sub>): δ 28.1 (3CH<sub>3</sub>), 82.2 (CH), 83.8 (C-O), 105.5 (CH(Ar)), 108.5 (CH(Ar)), 112.9 (CH(Ar)), 130.9 (CH(Ar)), 148.5 (C(Ar)), 155.5 (C(Ar)), 158.9 (C), 159.2 (C), 173.2 (C); HRMS (ESI) m/z [M+H]<sup>+</sup> calcd for C<sub>14</sub>H<sub>17</sub>N<sub>2</sub>O<sub>4</sub>: 277.1183; found: 277.1184.

*tert*-Butyl 5-methoxyisoxazole-3-carboxylate (**2i**). **2i** was synthesized according to GP3 starting from **1a** and methanol. Yield: 37 mg, 92%; white solid; mp 83–85 °C; <sup>1</sup>H NMR (400 MHz, CDCl<sub>3</sub>): δ 1.59 (s, 9H, 3CH<sub>3</sub>), 4.02 (s, 3H, CH<sub>3</sub>), 5.58 (s, 1H, CH); <sup>13</sup>C NMR (100 MHz, CDCl<sub>3</sub>): δ 28.1 (3CH<sub>3</sub>), 59.3 (CH<sub>3</sub>), 78.1 (CH), 83.6 (C-O), 159.11 (C),

159.17 (C), 175.0 (C); HRMS (ESI)  $m/z$   $[M+Na]^+$  calcd for  $C_9H_{13}NaNO_4$ : 222.0737; found: 222.0739.

*tert*-Butyl 5-ethoxyisoxazole-3-carboxylate (**2j**). **2j** was synthesized according to GP3 starting from **1a** and ethanol. Yield: 38 mg, 89%; colorless oil;  $^1H$  NMR (400 MHz,  $CDCl_3$ ):  $\delta$  1.44 (t,  $^3J = 7.1$  Hz, 3H,  $CH_3$ ), 1.57 (s, 9H, 3 $CH_3$ ), 4.26 (q,  $^3J = 7.1$  Hz, 2H,  $CH_2$ ), 5.53 (s, 1H, CH);  $^{13}C$  NMR (100 MHz,  $CDCl_3$ ):  $\delta$  14.4 ( $CH_3$ ), 28.1 (3 $CH_3$ ), 68.9 ( $CH_2$ ), 78.4 (CH), 83.5 (C-O), 159.1 (C), 159.2 (C), 174.3 (C); HRMS (ESI)  $m/z$   $[M+H]^+$  calcd for  $C_{10}H_{16}NO_4$ : 214.1074; found: 214.1070.

*Di-tert-butyl 5,5'-[1,2-phenylenebis(oxy)]diisoxazole-3-carboxylate (2k)* **2k** was synthesized according to GP2 starting from **1a** and 1,2-benzenediol. Yield: 34 mg, 76 %; yellowish oil;  $R_f = 0.32$  (petroleum ether:EtOAc = 4:1);  $^1H$  NMR (400 MHz,  $CDCl_3$ ):  $\delta$  1.58 (s, 18H, 6 $CH_3$ ), 5.66 (s, 2H, 2CH), 7.30–7.38 (m, 4H, 4CH(Ar));  $^{13}C$  NMR (100 MHz,  $CDCl_3$ ):  $\delta$  28.1 (6 $CH_3$ ), 82.8 (2CH), 84.0 (2C), 121.7 (2CH(Ar)), 127.9 (2CH(Ar)), 144.8 (2C), 158.6 (2C), 159.4 (2C), 171.7 (2C); HRMS (ESI)  $m/z$   $[M+NH_4]^+$  calcd for  $C_{22}H_{28}N_3O_8^+$ : 462.1875; found: 462.1871.

*Di-tert-butyl 5,5'-[1,3-phenylenebis(oxy)]diisoxazole-3-carboxylate (2l)* **2l** was synthesized according to GP2 starting from **1a** and 1,3-benzenediol. Yield: 36 mg, 82 %; colorless solid; mp 101–104 °C;  $R_f = 0.42$  (petroleum ether:EtOAc = 4:1);  $^1H$  NMR (400 MHz,  $CDCl_3$ ):  $\delta$  1.59 (s, 18H, 6 $CH_3$ ), 5.76 (s, 2H, 2CH), 7.04–7.07 (m, 1H, CH(Ar)), 7.08–7.14 (m, 2H, 2CH(Ar)), 7.43–7.51 (m, 1H, CH(Ar));  $^{13}C$  NMR (100 MHz,  $CDCl_3$ ):  $\delta$  28.1 (6 $CH_3$ ), 83.6 (2CH), 84.1 (2C), 110.1 (CH(Ar)), 116.3 (2CH(Ar)), 131.7 (CH(Ar)), 155.4 (2C), 158.6 (2C), 159.4 (2C), 171.6 (2C); HRMS (ESI)  $m/z$   $[M+NH_4]^+$  calcd for  $C_{22}H_{28}N_3O_8^+$ : 462.1872; found: 462.1871.

*Di-tert-butyl 5,5'-[1,4-phenylenebis(oxy)]diisoxazole-3-carboxylate (2m)* **2m** was synthesized according to GP2 starting from **1a** and 1,4-benzenediol. Yield: 37 mg, 84 %; colorless solid; mp 175–178 °C;  $R_f = 0.14$  (petroleum ether:EtOAc = 4:1);  $^1H$  NMR (400 MHz,  $CDCl_3$ ):  $\delta$  1.58 (s, 18H, 6 $CH_3$ ), 5.68 (s, 2H, 2CH), 7.26 (s, 4H, 4CH(Ar));  $^{13}C$  NMR (100 MHz,  $CDCl_3$ ):  $\delta$  28.1 (6 $CH_3$ ), 82.8 (2CH), 84.1 (2C), 120.9 (4CH(Ar)), 151.9 (2C), 158.7 (2C), 159.3 (2C), 172.3 (2C); HRMS (ESI)  $m/z$   $[M+H]^+$  calcd for  $C_{22}H_{25}N_2O_8^+$ : 445.1605; found: 445.1598.

*tert*-Butyl 5-(phenylsulfanyl)isoxazole-3-carboxylate (**2n**). **2n** was synthesized according to GP2 starting from **1a** and benzenethiol. Yield: 47 mg, 85%; colorless oil;  $R_f$  0.08 (petroleum ether: $CH_2Cl_2$  = 2:1)  $^1H$  NMR (400 MHz,  $CDCl_3$ ):  $\delta$  1.58 (s, 9H, 3 $CH_3$ ), 6.45 (s, 1H, CH), 7.34–7.42 (m, 3H, 3CH(Ar)), 7.45–7.54 (m, 2H, 2CH(Ar));  $^{13}C$  NMR (100 MHz,  $CDCl_3$ ):  $\delta$  28.1 (3 $CH_3$ ), 84.0 (C-O), 106.7 (CH), 129.4 (CH(Ar)), 129.8 (C(Ar)),

129.9 (2CH(Ar)), 132.8 (2CH(Ar)), 158.2 (C), 158.7 (C), 168.3 (C); HRMS (ESI)  $m/z$   $[M+H]^+$  calcd for  $C_{14}H_{16}NO_3S$ : 278.0845; found: 278.0848.

*tert-Butyl 5-(benzylsulfanyl)isoxazole-3-carboxylate (2o)*. **2o** was synthesized according to GP2 starting from **1a** and phenylmethanethiol. Yield: 45 mg, 78%; colorless oil;  $R_f$  0.23 (petroleum ether:EtOAc = 20:1)  $^1H$  NMR (400 MHz,  $CDCl_3$ ):  $\delta$  1.59 (s, 9H, 3CH<sub>3</sub>), 4.25 (s, 2H, CH<sub>2</sub>), 6.40 (s, 1H, CH), 7.26–7.34 (m, 5H, 5CH(Ar));  $^{13}C$  NMR (100 MHz,  $CDCl_3$ ):  $\delta$  28.1 (3CH<sub>3</sub>), 38.1 (CH<sub>2</sub>), 83.9 (C-O), 105.5 (CH), 128.1 (CH(Ar)), 128.9 (4CH(Ar)), 136.0 (C(Ar)), 158.2 (C), 158.8 (C), 167.7 (C); HRMS (ESI)  $m/z$   $[M+H]^+$  calcd for  $C_{15}H_{18}NO_3S$ : 292.1002; found: 292.1004.

*Methyl 5-morpholinoisoxazole-3-carboxylate (2r)*. **2r** was synthesized according to GPI starting from **1b** and morpholine. Yield: 42 mg, 98%; white solid; mp 137–139 °C;  $^1H$  NMR (400 MHz,  $CDCl_3$ ):  $\delta$  3.30–3.35 (m, 4H, 2CH<sub>2</sub>), 3.74–3.80 (m, 4H, 2CH<sub>2</sub>), 3.89 (s, 3H, CH<sub>3</sub>O), 5.42 (s, 1H, CH);  $^{13}C$  NMR (100 MHz,  $CDCl_3$ ):  $\delta$  46.6 (2CH<sub>2</sub>), 52.7 (CH<sub>3</sub>O), 65.8 (2CH<sub>2</sub>), 79.3 (CH), 157.0 (C), 160.9 (C), 171.8 (C); HRMS (ESI)  $m/z$   $[M+H]^+$  calcd for  $C_9H_{13}N_2O_4$ : 213.0870; found: 213.0878.

*Methyl 5-phenoxyisoxazole-3-carboxylate (2s)*. **2s** was synthesized according to GP2 starting from **1b** and phenol. Yield: 40 mg, 91%; colorless oil;  $R_f$  0.20 (petroleum ether:EtOAc = 10:1)  $^1H$  NMR (400 MHz,  $CDCl_3$ ):  $\delta$  3.93 (s, 3H, CH<sub>3</sub>O), 5.66 (s, 1H, CH), 7.18–7.22 (m, 2H, 2CH(Ar)), 7.27–7.32 (m, 1H, CH(Ar)), 7.40–7.45 (m, 2H, 2CH(Ar));  $^{13}C$  NMR (100 MHz,  $CDCl_3$ ):  $\delta$  53.0 (CH<sub>3</sub>O), 82.1 (CH), 119.3 (2CH(Ar)), 126.6 (CH(Ar)), 130.4 (2CH(Ar)), 154.3 (C-O), 157.7 (C), 160.2 (C), 173.4 (C); HRMS (ESI)  $m/z$   $[M+H]^+$  calcd for  $C_{11}H_{10}NO_4$ : 220.0604; found: 220.0604.

*Methyl 5-(phenylsulfanyl)isoxazole-3-carboxylate (2t)*. **2t** was synthesized according to GP2 starting from **1b** and benzenethiol. Yield: 44 mg, 93%; colorless oil;  $R_f$  0.20 (petroleum ether:EtOAc = 10:1)  $^1H$  NMR (400 MHz,  $CDCl_3$ ):  $\delta$  3.92 (s, 3H, CH<sub>3</sub>O), 6.45 (s, 1H, CH), 7.34–7.42 (m, 3H, 3CH(Ar)), 7.47–7.54 (m, 2H, 2CH(Ar));  $^{13}C$  NMR (100 MHz,  $CDCl_3$ ):  $\delta$  53.0 (CH<sub>3</sub>O), 106.1 (CH), 129.3 (C(Ar)), 129.6 (CH(Ar)), 129.9 (2CH(Ar)), 133.0 (2CH(Ar)), 156.6 (C), 160.0 (C), 169.2 (C); HRMS (ESI)  $m/z$   $[M+H]^+$  calcd for  $C_{11}H_{10}NO_3S$ : 236.0376; found: 236.0382.

*1-(5-Morpholinoisoxazol-3-yl)ethanone (2u)*. **2u** was synthesized according to GPI starting from **1c** and morpholine. Purification by column chromatography (petroleum ether/ethyl acetate = 3:1) afforded the desired **2r**. Yield: 29 mg, 73%; white solid; mp 107–110 °C;  $R_f$  0.28 (petroleum ether:EtOAc = 3:1)  $^1H$  NMR (400 MHz,  $CDCl_3$ ):  $\delta$  2.54 (s, 3H, CH<sub>3</sub>), 3.30–3.36 (m, 4H, 2CH<sub>2</sub>), 3.76–3.82 (m, 4H, 2CH<sub>2</sub>), 5.38 (s, 1H, CH);  $^{13}C$  NMR (100 MHz,  $CDCl_3$ ):  $\delta$  27.0 (CH<sub>3</sub>), 46.8 (2CH<sub>2</sub>), 65.9 (2CH<sub>2</sub>), 76.9 (CH), 163.2 (C),

172.0 (C), 193.0 (C=O); HRMS (ESI)  $m/z$   $[M+H]^+$  calcd for  $C_9H_{13}N_2O_3$ : 197.0921; found: 197.0926.

*1-(5-(Phenylsulfanyl)isoxazol-3-yl)ethanone (2w)*. **2w** was synthesized according to GP2 starting from **1c** and benzenethiol. Yield: 38 mg, 86%; colorless oil;  $R_f$  0.41 (petroleum ether:EtOAc = 20:1);  $^1H$  NMR (400 MHz,  $CDCl_3$ ):  $\delta$  2.60 (s, 3H,  $CH_3$ ), 6.41 (s, 1H, CH), 7.35–7.41 (m, 3H, 3CH(Ar)), 7.48–7.53 (m, 2H, 2CH(Ar));  $^{13}C$  NMR (100 MHz,  $CDCl_3$ ):  $\delta$  27.2 ( $CH_3$ ), 103.9 (CH), 129.4 (C(Ar)), 129.6 (CH(Ar)), 129.9 (2CH(Ar)), 133.1 (2CH(Ar)), 162.4 (C), 169.0 (C), 191.7 (C); HRMS (ESI)  $m/z$   $[M+H]^+$  calcd for  $C_{11}H_{10}NO_2S$ : 220.0427; found: 220.0420.

*(5-Morpholinoisoxazol-3-yl)(phenyl)methanone (2x)*. **2x** was synthesized according to GP1 starting from **1d** and morpholine. Yield: 45 mg, 87%; light-yellow solid; mp 123–124 °C;  $^1H$  NMR (400 MHz,  $CDCl_3$ ):  $\delta$  3.37–3.43 (m, 4H, 2 $CH_2$ ), 3.80–3.86 (m, 4H, 2 $CH_2$ ), 5.56 (s, 1H, CH), 7.46–7.53 (m, 2H, 2CH(Ar)), 7.59–7.65 (m, 1H, CH(Ar)), 8.23–8.28 (m, 2H, 2CH(Ar));  $^{13}C$  NMR (100 MHz,  $CDCl_3$ ):  $\delta$  46.8 (2 $CH_2$ ), 66.0 (2 $CH_2$ ), 79.4 (CH), 128.6 (2CH(Ar)), 130.7 (2CH(Ar)), 134.0 (CH(Ar)), 136.0 (C(Ar)), 163.1 (C), 171.4 (C), 186.7 (C=O); HRMS (ESI)  $m/z$   $[M+Na]^+$  calcd for  $C_{14}H_{14}NaN_2O_3Na$ : 281.0897; found: 281.0893.

*5-Morpholinoisoxazole-3-carboxamide (2y)*. **2y** was synthesized according to GP1 using THF as a solvent, starting from **1e** and morpholine. Yield: 34 mg, 87%; white solid; mp 138–139 °C;  $^1H$  NMR (400 MHz,  $CDCl_3$ ):  $\delta$  3.32–3.37 (m, 4H, 2 $CH_2$ ), 3.78–3.83 (m, 4H, 2 $CH_2$ ), 5.50 (s, 1H, CH), 6.02 (br.s, 1H,  $NH_2$ ), 6.73 (br.s, 1H,  $NH_2$ );  $^{13}C$  NMR (100 MHz,  $CDCl_3$ ):  $\delta$  46.7 (2 $CH_2$ ), 65.9 (2 $CH_2$ ), 78.6 (CH), 159.1 (C), 161.7 (C), 172.1 (C); HRMS (ESI)  $m/z$   $[M+H]^+$  calcd for  $C_8H_{12}N_3O_3$ : 198.0873; found: 198.0878.

*Diethyl (5-morpholinoisoxazol-3-yl)phosphonate (2z)*. **2z** was synthesized according to GP1 starting from **1f** and morpholine. Yield: 53 mg, 92%; yellow oil;  $^1H$  NMR (400 MHz,  $CDCl_3$ ):  $\delta$  1.36 (dt,  $^3J_{HH} = 7.1$  Hz,  $^4J_{PH} = 0.6$  Hz, 6H, 2 $CH_3$ ), 3.32–3.37 (m, 4H, 2 $CH_2$ ), 3.76–3.82 (m, 4H, 2 $CH_2$ ), 4.16–4.29 (m, 4H, 2 $CH_2O$ ), 5.33 (d,  $^3J_{PH} = 1.4$  Hz, 1H, CH);  $^{13}C$  NMR (100 MHz,  $CDCl_3$ ):  $\delta$  16.4 ( $^3J_{CP} = 6.5$  Hz, 2 $CH_3$ ), 46.8 (2 $CH_2$ ), 63.6 ( $^2J_{CP} = 5.9$  Hz, 2 $CH_2$ ), 66.0 (2 $CH_2$ ), 81.3 ( $^2J_{CP} = 21.7$  Hz, CH), 156.8 ( $^1J_{CP} = 209.2$  Hz, C), 171.5 ( $^3J_{CP} = 12.0$  Hz, C);  $^{31}P$  NMR (162 MHz,  $CDCl_3$ ):  $\delta$  5.40; HRMS (ESI)  $m/z$   $[M+H]^+$  calcd for  $C_{11}H_{20}N_2O_5P$ : 291.1104; found: 291.1102.

*Diethyl (5-phenoxyisoxazol-3-yl)phosphonate (2za)*. **2za** was synthesized according to GP2 starting from **1f** and phenol. Yield: 55 mg, 92%; colorless oil;  $R_f$  0.20 (petroleum ether:EtOAc = 2:1);  $^1H$  NMR (400 MHz,  $CDCl_3$ ):  $\delta$  1.36 (dt,  $^3J_{HH} = 7.0$  Hz,  $^4J_{PH} = 0.7$

Hz, 6H, 2CH<sub>3</sub>), 4.16–4.30 (m, 4H, 2CH<sub>2</sub>O), 5.51 (d, <sup>3</sup>J<sub>PH</sub> = 1.1 Hz, 1H, CH), 7.17–7.22 (m, 2H, 2CH(Ar)), 7.25–7.31 (m, 1H, CH(Ar)), 7.38–7.45 (m, 2H, 2CH(Ar)); <sup>13</sup>C NMR (100 MHz, CDCl<sub>3</sub>): δ 16.3 (<sup>3</sup>J<sub>CP</sub> = 6.5 Hz, 2CH<sub>3</sub>), 63.8 (<sup>2</sup>J<sub>CP</sub> = 5.9 Hz, 2CH<sub>2</sub>), 83.7 (<sup>2</sup>J<sub>CP</sub> = 20.5 Hz, CH), 119.4 (2CH(Ar)), 126.4 (CH(Ar)), 130.4 (2CH(Ar)), 154.7 (C(Ar)), 158.2 (<sup>1</sup>J<sub>CP</sub> = 211.6 Hz, C), 173.5 (<sup>3</sup>J<sub>CP</sub> = 12.9 Hz, C); <sup>31</sup>P NMR (162 MHz, CDCl<sub>3</sub>): δ 3.72; HRMS (ESI) m/z [M+H]<sup>+</sup> calcd for C<sub>13</sub>H<sub>17</sub>NO<sub>5</sub>P: 298.0839; found: 298.0843.

*Diethyl (5-(phenylsulfanyl)isoxazol-3-yl)phosphonate (2zb)*. **2zb** was synthesized according to GP2 starting from **1f** and benzenethiol. Yield: 56 mg, 89%; colorless oil; R<sub>f</sub> 0.23 (petroleum ether:EtOAc = 2:1); <sup>1</sup>H NMR (400 MHz, CDCl<sub>3</sub>): δ 1.34 (dt, <sup>3</sup>J<sub>HH</sub> = 7.1 Hz, <sup>4</sup>J<sub>PH</sub> = 0.7 Hz, 6H, 2CH<sub>3</sub>), 4.13–4.28 (m, 4H, 2CH<sub>2</sub>O), 6.26 (d, <sup>3</sup>J<sub>PH</sub> = 0.9 Hz, 1H, CH), 7.34–7.42 (m, 3H, 3CH(Ar)), 7.49–7.54 (m, 2H, 2CH(Ar)); <sup>13</sup>C NMR (100 MHz, CDCl<sub>3</sub>): δ 16.3 (<sup>3</sup>J<sub>CP</sub> = 6.5 Hz, 2CH<sub>3</sub>), 63.9 (<sup>2</sup>J<sub>CP</sub> = 5.9 Hz, 2CH<sub>2</sub>), 107.1 (<sup>2</sup>J<sub>CP</sub> = 20.3 Hz, CH), 129.0 (C(Ar)), 129.8 (CH(Ar)), 130.0 (2CH(Ar)), 133.4 (2CH(Ar)), 156.4 (<sup>1</sup>J<sub>CP</sub> = 210.8 Hz, C), 168.6 (<sup>3</sup>J<sub>CP</sub> = 11.6 Hz, C); <sup>31</sup>P NMR (162 MHz, CDCl<sub>3</sub>): δ 3.92; HRMS (ESI) m/z [M+Na]<sup>+</sup> calcd for C<sub>13</sub>H<sub>16</sub>NO<sub>4</sub>PSNa: 336.0430; found: 336.0430.

*Adamantan-1-ylmethyl 5-morpholinoisoxazole-3-carboxylate (2zc)*. **2zc** was synthesized according to GP1 starting from **1g** and morpholine. Yield: 62 mg, 90%; white solid; mp 102–104 °C; <sup>1</sup>H NMR (400 MHz, CDCl<sub>3</sub>): δ 1.56–1.61 (m, 6H, 3CH<sub>2</sub>), 1.61–1.68 (m, 3H, 3CH<sub>2</sub>), 1.68–1.77 (m, 3H, 3CH<sub>2</sub>), 1.94–2.03 (m, 3H, 3CH), 3.31–3.38 (m, 4H, 2CH<sub>2</sub>), 3.76–3.82 (m, 4H, 2CH<sub>2</sub>), 3.93 (s, 2H, CH<sub>2</sub>O), 5.43 (s, 1H, CH); <sup>13</sup>C NMR (100 MHz, CDCl<sub>3</sub>): δ 28.0 (3CH), 33.5 (C), 36.9 (3CH<sub>2</sub>), 39.3 (3CH<sub>2</sub>), 46.7 (2CH<sub>2</sub>), 65.9 (2CH<sub>2</sub>), 75.1 (CH<sub>2</sub>O), 79.3 (CH), 157.4 (C), 160.7 (C), 171.8 (C); HRMS (ESI) m/z [M+H]<sup>+</sup> calcd for C<sub>19</sub>H<sub>27</sub>N<sub>2</sub>O<sub>4</sub>: 347.1965; found: 347.1964.

*Adamantan-1-ylmethyl 5-phenoxyisoxazole-3-carboxylate (2zd)*. **2zd** was synthesized according to GP2 starting from **1g** and phenol. Yield: 61 mg, 87%; white solid; mp 115–117 °C; R<sub>f</sub> 0.33 (petroleum ether:EtOAc = 20:1); <sup>1</sup>H NMR (400 MHz, CDCl<sub>3</sub>): δ 1.57–1.61 (m, 6H, 3CH<sub>2</sub>), 1.63–1.69 (m, 3H, 3CH<sub>2</sub>), 1.69–1.76 (m, 3H, 3CH<sub>2</sub>), 1.96–2.03 (m, 3H, 3CH), 3.95 (s, 2H, CH<sub>2</sub>O), 5.67 (s, 1H, CH), 7.18–7.24 (m, 2H, 2CH), 7.27–7.33 (m, 1H, CH), 7.40–7.47 (m, 2H, 2CH); <sup>13</sup>C NMR (100 MHz, CDCl<sub>3</sub>): δ 28.1 (3CH), 33.6 (C), 36.9 (3CH<sub>2</sub>), 39.3 (3CH<sub>2</sub>), 75.5 (CH<sub>2</sub>O), 82.2 (CH), 119.2 (2CH(Ar)), 126.5 (CH(Ar)), 130.4 (2CH(Ar)), 154.4 (C(Ar)), 158.1 (C), 160.1 (C), 173.2 (C); HRMS (ESI) m/z [M+H]<sup>+</sup> calcd for C<sub>21</sub>H<sub>24</sub>NO<sub>4</sub>: 354.1700; found: 354.1697.

*Adamantan-1-ylmethyl 5-(phenylsulfanyl)isoxazole-3-carboxylate (2ze)*. **2ze** was synthesized according to GP2 starting from **1g** and benzenethiol. Yield: 63 mg, 85%; white solid; mp 73–74 °C; R<sub>f</sub> 0.40 (petroleum ether:EtOAc = 20:1); <sup>1</sup>H NMR (400 MHz,



CDCl<sub>3</sub>):  $\delta$  1.56–1.61 (m, 6H, 3CH<sub>2</sub>), 1.62–1.71 (m, 3H, 3CH<sub>2</sub>), 1.71–1.76 (m, 3H, 3CH<sub>2</sub>), 1.96–2.02 (m, 3H, 3CH), 3.95 (s, 2H, CH<sub>2</sub>O), 6.51 (s, 1H, CH), 7.36–7.41 (m, 3H, 3CH), 7.48–7.54 (m, 2H, 2CH); <sup>13</sup>C NMR (100 MHz, CDCl<sub>3</sub>):  $\delta$  28.0 (3CH), 33.6 (C), 36.9 (3CH<sub>2</sub>), 39.2 (3CH<sub>2</sub>), 75.5 (CH<sub>2</sub>O), 106.5 (CH), 129.48 (CH), 129.54 (C), 129.9 (2CH), 132.9 (2CH), 157.0 (C), 159.9 (C), 168.5 (C); HRMS (ESI)  $m/z$  [M+NH<sub>4</sub>]<sup>+</sup> calcd for C<sub>21</sub>H<sub>27</sub>N<sub>2</sub>O<sub>3</sub>S: 387.1737; found: 387.1735.

*Methyl 4-methyl-5-morpholinoisoxazole-3-carboxylate (2zf)*. **2zf** was synthesized according to *GPI* starting from **1h** and morpholine at 80 °C for 6 h. Purification by column chromatography (petroleum ether/ethyl acetate = 4:1) afforded the desired **2zf**. Yield: 35 mg, 77%; white solid; mp 119–121 °C; R<sub>f</sub> 0.16 (petroleum ether:EtOAc = 4:1); <sup>1</sup>H NMR (400 MHz, CDCl<sub>3</sub>):  $\delta$  2.13 (s, 3H, CH<sub>3</sub>), 3.35–3.40 (m, 4H, 2CH<sub>2</sub>), 3.77–3.83 (m, 4H, 2CH<sub>2</sub>), 3.92 (s, 3H, CH<sub>3</sub>O); <sup>13</sup>C NMR (100 MHz, CDCl<sub>3</sub>):  $\delta$  7.8 (CH<sub>3</sub>), 48.0 (2CH<sub>2</sub>), 52.5 (CH<sub>3</sub>O), 66.5 (2CH<sub>2</sub>), 93.6 (C), 156.0 (C), 161.6 (C=O), 169.2 (C); HRMS (ESI)  $m/z$  [M+K]<sup>+</sup> calcd for C<sub>10</sub>H<sub>14</sub>N<sub>2</sub>O<sub>4</sub>K: 265.0585; found: 265.0583.

*4-(3-Nitroisoxazol-5-yl)morpholine (2zg)*. **2zg** was synthesized according to *GPI* starting from **1i** and morpholine. Yield: 35 mg, 88%; yellow solid; mp 118–119 °C; <sup>1</sup>H NMR (400 MHz, CDCl<sub>3</sub>):  $\delta$  3.36–3.43 (m, 4H, 2CH<sub>2</sub>), 3.75–3.84 (m, 4H, 2CH<sub>2</sub>), 5.56 (s, 1H, CH); <sup>13</sup>C NMR (100 MHz, CDCl<sub>3</sub>):  $\delta$  46.0 (2CH<sub>2</sub>), 65.7 (2CH<sub>2</sub>), 73.6 (CH), 168.0 (C-NO<sub>2</sub>), 172.1 (C); HRMS (ESI)  $m/z$  [M+H]<sup>+</sup> calcd for C<sub>7</sub>H<sub>10</sub>N<sub>3</sub>O<sub>4</sub>: 200.0666; found: 200.0670.

*3-Nitro-5-phenoxyisoxazole (2zh)*. **2zh** was synthesized according to *GP2* starting from **1i** and phenol. Yield: 38 mg, 93%; colorless oil; R<sub>f</sub> 0.31 (petroleum ether:EtOAc = 10:1); <sup>1</sup>H NMR (400 MHz, CDCl<sub>3</sub>):  $\delta$  5.83 (s, 1H, CH), 7.23–7.28 (m, 2H, 2CH(Ar)), 7.34–7.40 (m, 1H, CH(Ar)), 7.46–7.53 (m, 2H, 2CH(Ar)); <sup>13</sup>C NMR (100 MHz, CDCl<sub>3</sub>):  $\delta$  77.4 (CH), 119.4 (2CH(Ar)), 127.8 (CH(Ar)), 130.7 (2CH(Ar)), 153.5 (C(Ar)), 167.5 (C-NO<sub>2</sub>), 174.0 (C); HRMS (ESI)  $m/z$  [M+Na]<sup>+</sup> calcd for C<sub>9</sub>H<sub>6</sub>NaN<sub>2</sub>O<sub>4</sub>: 229.0220; found: 229.0217.

*3-Nitro-5-(phenylsulfanyl)isoxazole (2zi)*. **2zi** was synthesized according to *GP2* starting from **1i** and benzenethiol. Yield: 40 mg, 90%; colorless oil; R<sub>f</sub> 0.35 (petroleum ether:CH<sub>2</sub>Cl<sub>2</sub> = 2:1); <sup>1</sup>H NMR (400 MHz, CDCl<sub>3</sub>):  $\delta$  6.49 (s, 1H, CH), 7.42–7.51 (m, 3H, 3CH(Ar)), 7.58–7.64 (m, 2H, 2CH(Ar)); <sup>13</sup>C NMR (100 MHz, CDCl<sub>3</sub>):  $\delta$  99.6 (CH), 127.3 (C(Ar)), 130.4 (2CH(Ar)), 130.7 (CH(Ar)), 134.1 (2CH(Ar)), 167.6 (C-NO<sub>2</sub>), 174.0 (C); HRMS (ESI)  $m/z$  [M+Na]<sup>+</sup> calcd for C<sub>9</sub>H<sub>6</sub>N<sub>2</sub>O<sub>3</sub>SNa: 244.9991; found: 245.0005.

*Methyl 5-([1-(1-adamantyl)ethyl]amino)isoxazole-3-carboxylate (9)*. **9** was synthesized according to GP2 starting from **1b** and **8** (rimantadine). Purification by column chromatography (petroleum ether/ethyl acetate = 4:1) afforded the desired **9**. Yield: 47 mg, 86 %; white solid; mp 209-210 °C;  $R_f$  0.38 (petroleum ether:EtOAc = 3:1);  $^1\text{H}$  NMR (400 MHz,  $\text{CDCl}_3$ ):  $\delta$  1.13 (d,  $^3J = 6.8$  Hz, 3H,  $\text{CH}_3$ ), 1.44–1.52 (m, 3H,  $3\text{CH}_2$ ), 1.56–1.66 (m, 6H,  $3\text{CH}_2$ ), 1.68–1.75 (m, 3H,  $3\text{CH}_2$ ), 1.97–2.03 (m, 3H,  $3\text{CH}$ ), 2.97 (dt,  $^3J = 6.8$  Hz,  $^3J = 10.0$  Hz, 1H, CH), 3.91 (s, 3H,  $\text{CH}_3$ ), 4.56 (br.d,  $^3J = 10.0$  Hz, 1H, NH), 5.34 (s, 1H, CH);  $^{13}\text{C}$  NMR (100 MHz,  $\text{CDCl}_3$ ):  $\delta$  14.9 ( $\text{CH}_3$ ), 28.3 ( $3\text{CH}$ ), 36.7 (C), 37.1 ( $3\text{CH}_2$ ), 38.5 ( $3\text{CH}_2$ ), 52.7 ( $\text{CH}_3\text{O}$ ), 60.7 (CHN), 77.4 (CH), 157.1 (C), 161.3 (C), 171.5 (C); HRMS (ESI)  $m/z$   $[\text{M}+\text{H}]^+$  calcd for  $\text{C}_{17}\text{H}_{25}\text{N}_2\text{O}_3$ : 305.1860; found: 305.1853.

*Methyl 5-(((8R,9S,13S,14S,17R)-17-ethynyl-17-hydroxy-13-methyl-7,8,9,11,12,13,14,15,16,17-decahydro-6H-cyclopenta[a]phenanthren-3-yl)oxy)isoxazole-3-carboxylate (11)*. **11** was synthesized according to GP2 starting from **1b** and **10** (ethinylestradiol). Purification by column chromatography (petroleum ether/ethyl acetate = 3:1) afforded the desired **11**. Yield: 66 mg, 78 %; white solid, mp 127-128 °C;  $R_f$  0.16 (petroleum ether:EtOAc = 4:1);  $^1\text{H}$  NMR (400 MHz,  $\text{CDCl}_3$ ):  $\delta$  0.90 (s, 3H,  $\text{CH}_3$ ), 1.32–1.60 (m, 4H,  $3\text{CH}_2+\text{CH}$ ), 1.66–1.86 (m, 3H,  $\text{CH}+2\text{CH}_2$ ), 1.86-2.01 (m, 4H,  $3\text{CH}_2+\text{OH}$ ), 2.21-2.45 (m, 3H,  $2\text{CH}_2+\text{CH}$ ), 2.61 (s, 1H,  $\text{HC}\equiv$ ), 2.82–2.93 (m, 2H,  $\text{CH}_2$ ), 3.94 (s, 3H,  $\text{CH}_3\text{O}$ ), 5.65 (s, 1H, CH), 6.88-6.93 (m, 1H, CH), 6.93-7.00 (m, 1H, CH), 7.30-7.36 (m, 1H, CH);  $^{13}\text{C}$  NMR (100 MHz,  $\text{CDCl}_3$ ):  $\delta$  12.8 ( $\text{CH}_3$ ), 22.9 ( $\text{CH}_2$ ), 26.4 ( $\text{CH}_2$ ), 27.0 ( $\text{CH}_2$ ), 29.7 ( $\text{CH}_2$ ), 32.8 ( $\text{CH}_2$ ), 39.07 ( $\text{CH}_2$ ), 39.12 (CH), 43.8 (CH), 47.2 (C), 49.6 (CH), 53.0 ( $\text{CH}_3$ ), 74.3 ( $\equiv\text{CH}$ ), 79.9 ( $\equiv\text{C}$ ), 81.9 (CH), 87.5 (C), 116.3 (CH), 119.2 (CH), 127.3 (CH), 138.9 (C), 139.4 (C), 152.2 (C), 157.7 (C), 160.4 (C), 173.8 (C). HRMS (ESI)  $m/z$   $[\text{M}+\text{H}]^+$  calcd for  $\text{C}_{25}\text{H}_{28}\text{NO}_5$ : 422.1962; found: 422.1956.

**Synthesis of tert-butyl 5-azidoisoxazole-3-carboxylate (2f)**.  $\text{NaN}_3$  (0.25 mmol) was added to the solution of 5-nitroisoxazole **1a** (0.2 mmol) in  $\text{CH}_3\text{CN}$  (2 mL) and the resulting mixture was stirred at r. t. for 24 h. The mixture was poured into  $\text{CH}_2\text{Cl}_2$  (30 mL) and it was washed with water (15 mL). The organic layer was dried over anhydrous  $\text{MgSO}_4$  and concentrated under reduced pressure to give product **2f** which required no additional purification. Yield: 41 mg, 98%; colorless oil;  $^1\text{H}$  NMR (400 MHz,  $\text{CDCl}_3$ ):  $\delta$  1.56 (s, 9H,  $3\text{CH}_3$ ), 6.01 (s, 1H, CH);  $^{13}\text{C}$  NMR (100 MHz,  $\text{CDCl}_3$ ):  $\delta$  28.1 ( $3\text{CH}_3$ ), 84.2 (C-O), 90.0 (CH), 158.4 (C), 159.4 (C), 162.5 (C); HRMS (ESI)  $m/z$   $[\text{M}+\text{Na}]^+$  calcd for  $\text{C}_8\text{H}_{10}\text{N}_4\text{O}_3\text{Na}$ : 233.0645; found: 233.0649.

**Synthesis of tert-butyl isoxazole-3-carboxylate (2p)**. 5-Nitroisoxazole **1a** (0.4 mmol) was dissolved in mixture of THF (2.6 mL) and water (0.8 mL) and cooled down to 0 °C.

NaBH<sub>4</sub> (61 mg, 1.6 mmol) was added and the mixture was stirred at 0 °C for 30 min. Then the mixture was warmed slowly up to r. t. and stirred for 2 h. NH<sub>4</sub>Cl saturated solution (5 mL) was added and the resulting mixture was extracted with CH<sub>2</sub>Cl<sub>2</sub> (3×15 mL). The combined organic layers were dried over anhydrous MgSO<sub>4</sub> and concentrated under reduced pressure to give product **2p** which required no additional purification. Yield: 49 mg, 73%; brownish oil; <sup>1</sup>H NMR (400 MHz, CDCl<sub>3</sub>): δ 1.61 (s, 9H, 3CH<sub>3</sub>), 6.71 (d, <sup>3</sup>J = 1.7 Hz, 1H, CH), 8.48 (d, <sup>3</sup>J = 1.7 Hz, 1H, CH); <sup>13</sup>C NMR (100 MHz, CDCl<sub>3</sub>): δ 28.2 (3CH<sub>3</sub>), 83.9 (C-O), 105.3 (CH), 156.9 (C), 159.0 (C=O), 159.8 (CH); HRMS (ESI) m/z [M+H]<sup>+</sup> calcd for C<sub>8</sub>H<sub>12</sub>NO<sub>3</sub>: 170.0812; found: 170.0819.

**General Procedure 4.** Cerium (IV) ammonium nitrate (55 mg, 0.1 mmol) was added to a solution of isoxazole **2** (0.2 mmol) in (CH<sub>3</sub>CO)<sub>2</sub>O (1 mL). The reaction mixture was stirred for 24 h, and then poured into water (30 mL) and neutralized with solution of NaHCO<sub>3</sub> (to pH 7–8). The product was extracted by CH<sub>2</sub>Cl<sub>2</sub> (4×10 mL). The combined organic layers were dried over MgSO<sub>4</sub>. The solvent was removed under reduced pressure and the residue was purified by column chromatography.

*4-(3,4-Dinitroisoxazol-5-yl)morpholine (3).* **3** was synthesized according to GP4 starting from **2zg**. Yield: 42 mg, 87%; yellow solid; mp 113–114 °C; R<sub>f</sub> 0.23 (petroleum ether:EtOAc = 3:1); <sup>1</sup>H NMR (400 MHz, CDCl<sub>3</sub>): δ 3.89 (ps.s, 8H, 4CH<sub>2</sub>); <sup>13</sup>C NMR (100 MHz, CDCl<sub>3</sub>): δ 49.0 (2CH<sub>2</sub>), 66.2 (2CH<sub>2</sub>), 105.6 (C<sup>4</sup>-NO<sub>2</sub>), 162.3 (C<sup>3</sup>-NO<sub>2</sub>), 162.8 (C); Anal. calcd. for C<sub>7</sub>H<sub>8</sub>N<sub>4</sub>O<sub>6</sub>: C, 34.43; H, 3.30; N, 22.95. Found: C, 34.39; H, 3.19; N, 22.91.

*Methyl 5-morpholino-4-nitroisoxazole-3-carboxylate (6).* **6** was synthesized according to GP4 starting from **2r**. Yield: 38 mg, 74%; light-yellow solid; mp 109–110 °C; R<sub>f</sub> 0.14 (petroleum ether:EtOAc = 4:1); <sup>1</sup>H NMR (400 MHz, CDCl<sub>3</sub>): δ 3.81–3.85 (m, 4H, 2CH<sub>2</sub>), 3.85–3.89 (m, 4H, 2CH<sub>2</sub>), 4.00 (s, 3H, CH<sub>3</sub>O); <sup>13</sup>C NMR (100 MHz, CDCl<sub>3</sub>): δ 49.0 (2CH<sub>2</sub>), 54.0 (CH<sub>3</sub>O), 66.4 (2CH<sub>2</sub>), 111.4 (C-NO<sub>2</sub>), 154.5 (C), 159.1 (C=O), 163.0 (C); HRMS (ESI) m/z [M+H]<sup>+</sup> calcd for C<sub>9</sub>H<sub>12</sub>N<sub>3</sub>O<sub>6</sub>: 258.0721; found: 258.0717.

**Synthesis of 4-(3-fluoro-4-nitroisoxazol-5-yl)morpholine (4a).** Bu<sub>4</sub>NF solution in THF (1 M, 0.4 mmol, 0.4 mL) was added to a solution of 3,4-dinitroisoxazole **3** (50 mg, 0.2 mmol) in CH<sub>3</sub>CN (2 mL) and the resulting mixture was stirred at r. t. for 24 h. After the reaction was finished, the resulting mixture was filtered through silica gel and in addition the silica gel layer was washed with EtOAc (50 mL). The filtrate was concentrated under reduced pressure and the residue was purified by column chromatography to give the product **4a**. Yield: 32 mg, 73%; white solid; mp 111–112 °C; <sup>1</sup>H NMR (400 MHz, CDCl<sub>3</sub>): δ 3.79–3.84 (m, 4H, 2CH<sub>2</sub>), 3.84–3.90 (m, 4H, 2CH<sub>2</sub>); <sup>13</sup>C NMR (100 MHz,

CDCl<sub>3</sub>):  $\delta$  48.3 (2CH<sub>2</sub>), 66.3 (2CH<sub>2</sub>), 103.0 ( $^2J_{CF}$  = 20.1 Hz, C-NO<sub>2</sub>), 163.6 (C), 163.0 ( $^1J_{CF}$  = 269.0 Hz, C); <sup>19</sup>F NMR (376 MHz, CDCl<sub>3</sub>):  $\delta$  -117.12.

**General procedure 5.** A nucleophile (0.2 mmol) and DIPEA (0.2 mmol, 26 mg) were added to a solution of 3,4-dinitroisoxazole **3** (50 mg, 0.2 mmol) in CH<sub>3</sub>CN (2 mL). The resulting mixture was stirred at r. t. for 24 h. After the reaction was finished, solvent was removed under reduced pressure, and the residue was partitioned between water and dichloromethane. The aqueous phase was extracted three times with CH<sub>2</sub>Cl<sub>2</sub> (15 mL), and the combined organic phases were dried over anhydrous MgSO<sub>4</sub> and concentrated under reduced pressure. The residue was purified by column chromatography to give the products **4b,c**.

*4-(4-Nitro-3-phenoxyisoxazol-5-yl)morpholine (4b).* **4b** was synthesized according to GP5 with phenol. Yield: 48 mg, 83%; white solid; mp 110–111 °C; R<sub>f</sub> 0.26 (petroleum ether:EtOAc = 3:1); <sup>1</sup>H NMR (400 MHz, CDCl<sub>3</sub>):  $\delta$  3.72–3.79 (m, 4H, 2CH<sub>2</sub>), 3.82–3.89 (m, 4H, 2CH<sub>2</sub>), 7.22–7.31 (m, 3H, 3CH(Ar)), 7.37–7.44 (m, 2H, 2CH(Ar)); <sup>13</sup>C NMR (100 MHz, CDCl<sub>3</sub>):  $\delta$  48.3 (2CH<sub>2</sub>), 66.4 (2CH<sub>2</sub>), 105.5 (C-NO<sub>2</sub>), 120.2 (2CH(Ar)), 126.3 (CH(Ar)), 129.9 (2CH(Ar)), 153.4 (C(Ar)), 164.4 (C), 165.5 (C). HRMS (ESI) m/z [M+H]<sup>+</sup> calcd for C<sub>13</sub>H<sub>14</sub>N<sub>3</sub>O<sub>5</sub>: 292.0928; found: 292.0928.

*N-Benzyl-5-morpholin-4-yl-4-nitroisoxazol-3-amine (4c).* **4c** was synthesized according to GP5 with benzylamine. Yield: 40 mg, 65%; yellowish oil; R<sub>f</sub> 0.13 (petroleum ether:EtOAc = 3:1); <sup>1</sup>H NMR (400 MHz, CDCl<sub>3</sub>):  $\delta$  3.73–3.79 (m, 4H, 2CH<sub>2</sub>), 3.81–3.86 (m, 4H, 2CH<sub>2</sub>), 4.43 (d, <sup>3</sup>J = 5.9 Hz, 2H, CH<sub>2</sub>-N) 6.39 (br.s, <sup>3</sup>J = 5.9 Hz, 2H, NH<sub>2</sub>), 7.29–7.39 (m, 5H, 5CH(Ar)); <sup>13</sup>C NMR (100 MHz, CDCl<sub>3</sub>):  $\delta$  46.5 (CH<sub>2</sub>), 48.6 (2CH<sub>2</sub>), 66.5 (2CH<sub>2</sub>), 106.5 (C-NO<sub>2</sub>), 120.2 (3CH(Ar)), 128.9 (2CH(Ar)), 137.8 (C(Ar)), 158.7 (C), 164.4 (C). HRMS (ESI) m/z [M+H]<sup>+</sup> calcd for C<sub>14</sub>H<sub>17</sub>N<sub>4</sub>O<sub>4</sub>: 305.1244; found: 305.1243.

**Synthesis of methyl 4-bromo-5-morpholinoisoxazole-3-carboxylate (5).** NBS (36 mg, 0.2 mmol) was added to a solution of methyl 5-morpholinoisoxazole-3-carboxylate **2r** (42 mg, 0.2 mmol) in CH<sub>2</sub>Cl<sub>2</sub> (2 mL) and the resulting mixture was stirred at r. t. for 24 h. After the reaction was finished, the reaction mixture was quenched with water, extracted with CH<sub>2</sub>Cl<sub>2</sub> (3×15 mL) and dried over anhydrous MgSO<sub>4</sub>. The reaction mixture was concentrated under reduced pressure and the residue was purified by column chromatography to give the product **5**. Yield: 46 mg, 79%; white solid; mp 95–97 °C; R<sub>f</sub> 0.22 (petroleum ether:EtOAc = 3:1); <sup>1</sup>H NMR (400 MHz, CDCl<sub>3</sub>):  $\delta$  3.57–3.67 (m, 4H, 2CH<sub>2</sub>), 3.74–3.80 (m, 4H, 2CH<sub>2</sub>), 3.91 (s, 3H, CH<sub>3</sub>O); <sup>13</sup>C NMR (100 MHz, CDCl<sub>3</sub>):  $\delta$  46.9 (2CH<sub>2</sub>), 52.8 (CH<sub>3</sub>O), 66.2 (2CH<sub>2</sub>), 67.9 (C), 154.8 (C), 159.7 (C=O), 166.9 (C); HRMS (ESI) m/z [M+Na]<sup>+</sup> calcd for C<sub>9</sub>H<sub>11</sub>BrN<sub>2</sub>O<sub>4</sub>Na: 312.9794; found: 312.9793.

**Synthesis of (5-morpholinoisoxazol-3-yl)methanol (7).** A solution of methyl 5-morpholinoisoxazole-3-carboxylate **2r** (85 mg, 0.4 mmol) in THF (2 mL) was gently added to a suspension of LiAlH<sub>4</sub> (30 mg, 0.8 mmol) in THF (1 mL) under argon atmosphere. The resulting mixture was stirred at r. t. for 3 h. After cooling down to 0 °C, water (3 mL) was added to the reaction mixture. The resulting mixture was neutralized with 10% H<sub>2</sub>SO<sub>4</sub> and extracted with ethyl acetate (3×10 mL). The combined organic layers were dried over anhydrous MgSO<sub>4</sub> and concentrated under reduced pressure to give product **7** which required no additional purification. Yield: 51 mg, 69%; white solid; mp 79–80 °C; <sup>1</sup>H NMR (400 MHz, CDCl<sub>3</sub>): δ 3.24–3.34 (m, 4H, 2CH<sub>2</sub>), 3.74–3.83 (m, 4H, 2CH<sub>2</sub>), 4.57 (s, 2H, CH<sub>2</sub>), 5.09 (s, 1H, CH); <sup>13</sup>C NMR (100 MHz, CDCl<sub>3</sub>): δ 46.7 (2CH<sub>2</sub>), 57.2 (CH<sub>2</sub>), 66.0 (2CH<sub>2</sub>), 77.6 (CH), 165.3 (C), 171.2 (C); HRMS (ESI) m/z [M+H]<sup>+</sup> calcd for C<sub>8</sub>H<sub>13</sub>N<sub>2</sub>O<sub>3</sub>: 185.0921; found: 185.0923.

### 3. X-ray Diffraction Analysis.

Single crystals suitable for X-ray diffraction were obtained by slow evaporation of the solvent from a dichloromethane-*i*-PrOH solution of **2zg** and petroleum ether-dichloromethane - for **4a**. Crystal data collection and refinement parameters of **2zg** and **4a** are summarized in Table S1. Intensity data were collected at 295 K on a CAD-4 diffractometer for **2zg** and STADI VARI Pilatus-100K for **4a** diffractometer using monochromated Cu K $\alpha$  radiation,  $\lambda = 1.54186$  Å. The data were corrected for decay, Lorentz, and polarization effects as well as absorption and beam corrections based on the multi-scan technique. The structures were solved by a combination of direct methods in *SHELXS-97* and the difference Fourier technique, and refined by full-matrix least-squares procedures (*SHELXL-2015/1* or *SHELXL-2014/7*). Non hydrogen atoms were refined with anisotropic displacement parameters. The H-atoms were either located or calculated and subsequently treated with a riding model.

**Table S1.** Crystallographic data and structure refinement results of **2zg** and **4a**.

|                        | <b>2zg</b>                                                  | <b>4a</b>                                                    |
|------------------------|-------------------------------------------------------------|--------------------------------------------------------------|
| Empirical formula      | C <sub>7</sub> H <sub>9</sub> N <sub>3</sub> O <sub>4</sub> | C <sub>7</sub> H <sub>8</sub> FN <sub>3</sub> O <sub>4</sub> |
| Formula weight         | 199.17                                                      | 217.16                                                       |
| Temp, K                | 295(2)                                                      | 295(2)                                                       |
| Crystal system         | Monoclinic                                                  | Orthorhombic                                                 |
| Space group            | <i>P</i> 2 <sub>1</sub> / <i>n</i>                          | <i>P</i> 2 <sub>1</sub> 2 <sub>1</sub> 2 <sub>1</sub>        |
| <i>a</i> , Å           | 6.5806(19)                                                  | 5.3356(14)                                                   |
| <i>b</i> , Å           | 12.0214(16)                                                 | 8.561(3)                                                     |
| <i>c</i> , Å           | 10.9200(11)                                                 | 19.632(6)                                                    |
| $\alpha$ , (°)         | 90                                                          | 90                                                           |
| $\beta$ , (°)          | 93.833(17)                                                  | 90                                                           |
| $\gamma$ , (°)         | 90                                                          | 90                                                           |
| Volume, Å <sup>3</sup> | 861.9(3)                                                    | 896.8(5)                                                     |

|                                                                     |                                          |                                          |
|---------------------------------------------------------------------|------------------------------------------|------------------------------------------|
| $Z$                                                                 | 4                                        | 4                                        |
| $d_{\text{calc}}$ , g·cm <sup>-3</sup>                              | 1.535                                    | 1.608                                    |
| $\lambda$ , Å                                                       | 1.54186                                  | 1.54186                                  |
| $\mu$ , mm <sup>-1</sup>                                            | 1.100                                    | 1.003                                    |
| No. of data collected                                               | 1770                                     | 8235                                     |
| No. of unique data/ number restraints/<br>number refined parameters | 1770/0/127                               | 1670/0/136                               |
| $R_{\text{int}}$                                                    | 0.0230 (before absorption<br>correction) | 0.0671 (before<br>absorption correction) |
| Goodness-of-fit on $F^2$                                            | 1.053                                    | 1.003                                    |
| $R_1$ , $wR_2$ ( $I > 2$ ( $I$ ))                                   | 0.0352, 0.0916                           | 0.0533, 0.1307                           |
| $R_1$ , $wR_2$ (all data)                                           | 0.0404, 0.0949                           | 0.0588, 0.1343                           |

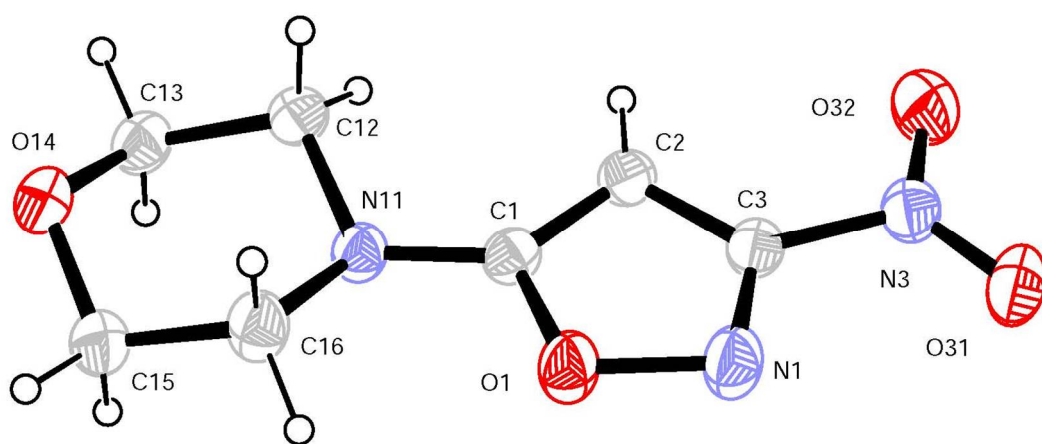

**Figure S1.** The molecular structure of compound **2zg**.

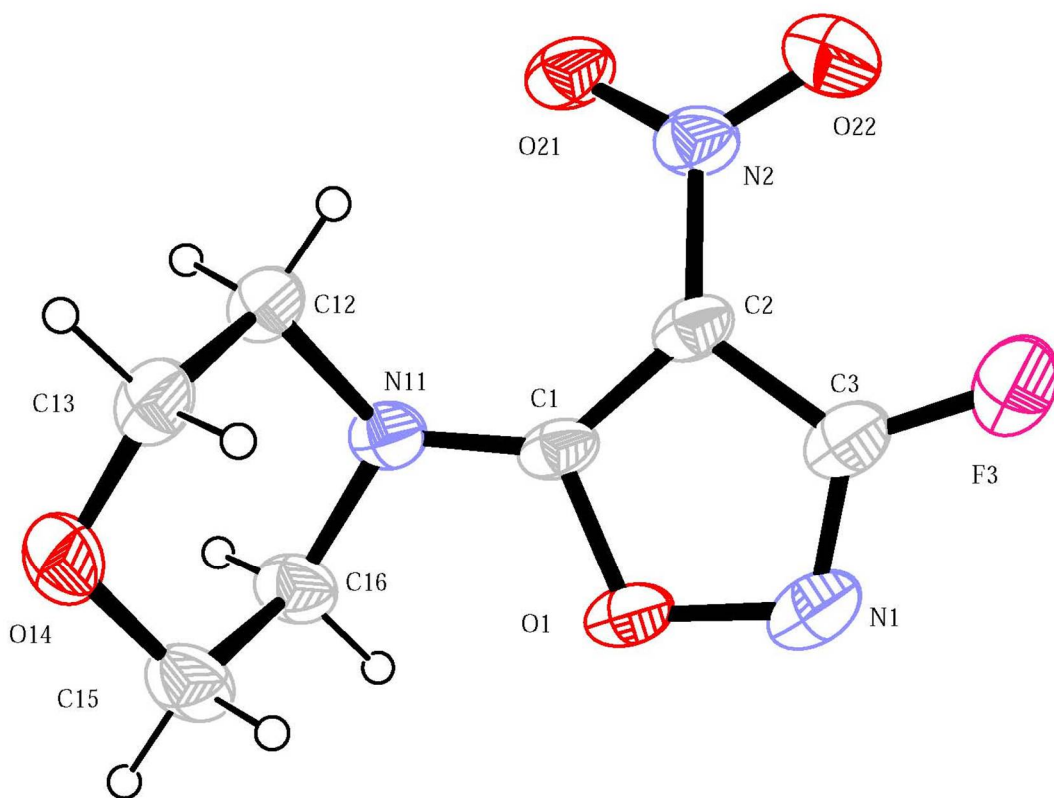

**Figure S2.** The molecular structure of compound **4a**.



#### 4. DFT Studies

Computations were carried out using ORCA 4.0.1<sup>3</sup>. Structure optimizations were performed using the DFT functional B3LYP/G<sup>4</sup> in conjunction with Grimme's dispersion correction D3(BJ)<sup>5</sup> and def2-TZVP basis set<sup>6</sup> with the auxiliary basis: def2/J<sup>7</sup>. In all calculations, solvent effects were modeled using the conductor-like PCM (CPCM)<sup>8</sup> with CH<sub>3</sub>CN as solvent. Convergence criteria were set tight for SCF calculations (TIGHTSCF). Thermodynamic properties were calculated at 298.15 K using QRRHO approach<sup>9</sup> for vibrational entropy correction. The nature of optimized intermediates and transition states was verified by frequency analysis. All the energies reported here are Gibbs free energies. Avogadro 1.2.0<sup>10</sup> was used to visualize the structure of the intermediates and FMOs. NBO Analysis was carried out with the JANPA package<sup>11</sup>.

#### 4.1 Computational Details

Orca DFT Key words for frequency and geometry optimization:

```
! B3LYP/G RIJCOSX D3BJ def2-TZVP def2/J Opt TIGHTSCF NumFreq CPCM(acetonitrile)
```

```
-----  
SCF SETTINGS
```

```
-----  
Hamiltonian:
```

```
Density Functional   Method      .... DFT(GTOs)  
Exchange Functional Exchange    .... B88  
  X-Alpha parameter XAlpha      .... 0.666667  
  Becke's b parameter XBeta       .... 0.004200  
Correlation Functional Correlation  .... LYP  
LDA part of GGA corr. LDAOpt       .... VWN-3  
Gradients option    PostSCFGGA   .... off  
Hybrid DFT is turned on  
  Fraction HF Exchange ScalHFX     .... 0.200000  
  Scaling of DF-GGA-X ScalDFX      .... 0.720000  
  Scaling of DF-GGA-C ScalDFC      .... 0.810000  
  Scaling of DF-LDA-C ScalLDAC     .... 1.000000  
  Perturbative correction           .... 0.000000  
  NL short-range parameter          .... 4.800000  
  RI-approximation to the Coulomb term is turned on  
  Number of auxiliary basis functions .... 943  
  RIJ-COSX (HFX calculated with COS-X).... on
```

```
-----  
CPCM SOLVATION MODEL
```

```
-----  
CPCM parameters:
```

```
Epsilon           ... 36.6000  
Refrac           ... 1.3440  
Rsolv            ... 1.3000  
Surface type     ... GEPOL SES  
Epsilon function type ... CPCM
```

## 4.2. FMOs and Natural Atomic Charges

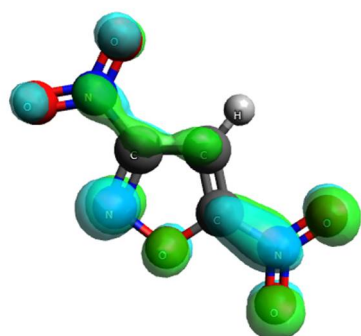

LUMO (-3.8 eV)

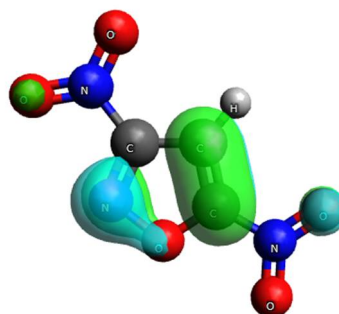

HOMO (-9.0 eV)

**Figure S3.** The HOMO and LUMO of 3,5-dinitroisoxazole **1i**.

**Table S2.** Natural Atomic Charges of 3,5-dinitroisoxazole **1i**.

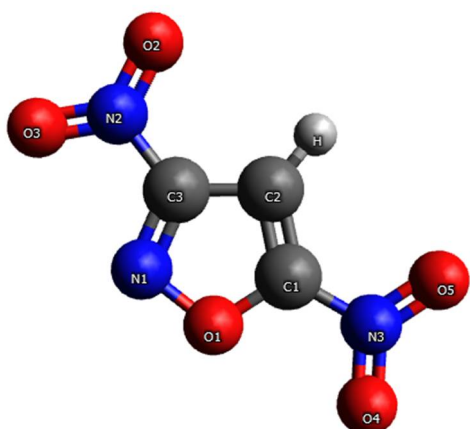

| Atom | Nuclear charge | Electron population | NMB population | NPA charge    |
|------|----------------|---------------------|----------------|---------------|
| C1   | 6.0            | 5.6384994           | 5.6125959      | 0.3615006048  |
| C2   | 6.0            | 6.2434817           | 6.2221182      | -0.2434817216 |
| C3   | 6.0            | 5.7972341           | 5.7696300      | 0.2027659057  |
| O4   | 8.0            | 8.1984117           | 8.1730309      | -0.1984116937 |
| H5   | 1.0            | 0.7008934           | 0.6995262      | 0.2991066139  |
| N6   | 7.0            | 7.0520019           | 7.0175768      | -0.0520018779 |

|     |     |           |           |               |
|-----|-----|-----------|-----------|---------------|
| N7  | 7.0 | 6.4890775 | 6.4462544 | 0.5109225092  |
| O8  | 8.0 | 8.3464685 | 8.3278483 | -0.3464684694 |
| O9  | 8.0 | 8.3393528 | 8.3203240 | -0.3393528142 |
| N10 | 7.0 | 6.5064749 | 6.4632541 | 0.4935250838  |
| O11 | 8.0 | 8.3421165 | 8.3233476 | -0.3421165205 |
| O12 | 8.0 | 8.3459876 | 8.3274860 | -0.3459876186 |

### 4.3. Conformational analysis of morpholine.

Initial set of conformers was generated using RDKit program<sup>12</sup>. After the removal structures with the same energy three different conformers of morpholine were received (Table S3). The optimized geometry and the thermodynamic data were obtained with DFT (B3LYP-G/def2-TZVP/acetonitrile (CPCM)) method. According to conformational analysis morpholine has two the most stable conformations (M-1 and M-2) with similar energy (the difference in energy is approximately 0.22 kcal/mol). These conformations differ in the arrangement of the electron pair. For the discussion of mechanistic aspects of its  $S_NAr$  reaction we have chosen the conformation M-2 with the equatorial arrangement of the electron pair since in this case the nucleophile centre is in the less sterically hindered position.

**Table S3.**

|                            | M-1                                                                                 | M-2                                                                                  | M-3                                                                                   |
|----------------------------|-------------------------------------------------------------------------------------|--------------------------------------------------------------------------------------|---------------------------------------------------------------------------------------|
|                            | 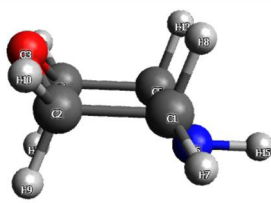 |  |  |
| $G_{298, Eh}$              | -287.83437760                                                                       | -287.83400852                                                                        | -287.82456225                                                                         |
| $\Delta G_{298, kcal/mol}$ | 0                                                                                   | 0.22                                                                                 | 6.12                                                                                  |

#### 4.4. Cartesian Coordinates

##### List of Cartesian Coordinates of all the optimized structures

##### 3,5-dinitroisoxazol (1i)

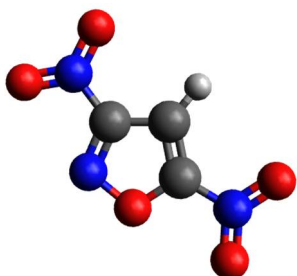

E = -655.31350770 Eh

ZPE = 0.06242156 Eh

G<sub>298</sub> = -655.28424234 Eh

|   |                   |                   |                   |
|---|-------------------|-------------------|-------------------|
| C | 1.05590244811648  | -0.02379680485905 | 0.00103866511423  |
| C | -0.00144312207226 | 0.82004247625121  | 0.00075720095120  |
| C | -1.07238225821852 | -0.09865450828682 | 0.00050018529167  |
| O | 0.67139953531082  | -1.30930832637123 | 0.00121496679025  |
| H | -0.02123998498240 | 1.89428728417557  | 0.00026145063089  |
| N | -0.69493762152410 | -1.35126416734175 | 0.00113074244717  |
| N | -2.49773685143095 | 0.21350609448711  | -0.00014245902392 |
| O | -2.78781177063204 | 1.39665565070621  | -0.00243390065067 |
| O | -3.27756109800068 | -0.71798773236244 | -0.00009839032304 |
| N | 2.47684386611737  | 0.22334069354362  | -0.00010446604073 |
| O | 3.20984349566437  | -0.74869976511024 | -0.00392565197158 |
| O | 2.82080336165192  | 1.39247910516781  | 0.00177165678454  |

## Morpholine

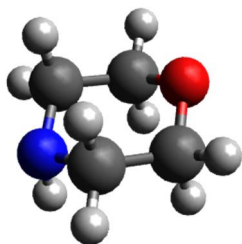

$$E = -287.94023799 \text{ Eh}$$

$$\text{ZPE} = 0.13469347 \text{ Eh}$$

$$G_{298} = -287.83400852 \text{ Eh}$$

|   |                   |                   |                   |
|---|-------------------|-------------------|-------------------|
| C | 1.37391744103724  | -0.07856127428074 | 0.22834599701949  |
| C | 0.62002845731733  | 1.21781127724598  | 0.48572397285763  |
| O | -0.70921995492533 | 0.95570535056208  | 0.94240992952384  |
| C | -1.44110438286694 | 0.16624891264655  | 0.00161327944536  |
| C | -0.73393245049706 | -1.15313306190920 | -0.27167138979190 |
| N | 0.66212599385765  | -0.97507037676792 | -0.69037163313489 |
| H | 2.36031619763816  | 0.14557032858366  | -0.18277886735300 |
| H | 1.51442682317989  | -0.60483147147776 | 1.17699637448823  |
| H | 1.10449130437678  | 1.81138582393326  | 1.26164940201761  |
| H | 0.57616125673738  | 1.81286873816442  | -0.43693431821445 |
| H | -1.55758726471892 | 0.73308804580209  | -0.93218607708058 |
| H | -2.42702878480421 | -0.00077559421954 | 0.43770324998057  |
| H | -1.27122955966701 | -1.70895280141674 | -1.04215288580935 |
| H | -0.74505993639801 | -1.75517578239426 | 0.64188068607126  |
| H | 0.67391485973305  | -0.56607811447188 | -1.62011772001982 |

## TS1

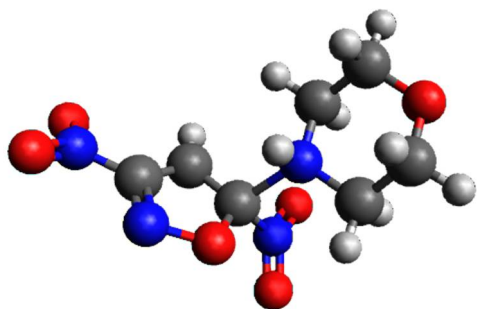

Imaginary mode -159.96

E = -943.24345621 Eh

ZPE = 0.19936094 Eh

G<sub>298</sub> = -943.08338653 Eh

|   |                   |                   |                   |
|---|-------------------|-------------------|-------------------|
| C | -2.20626168263070 | -0.31898752878354 | -0.15474656144239 |
| C | -1.25877960887897 | 0.01654100155075  | 0.79886230373977  |
| C | -0.27558261255861 | 0.67037482580099  | 0.01349343827018  |
| H | -1.24581770404088 | -0.18398827821049 | 1.85190128732848  |
| N | 0.30157239019399  | 1.98207102187390  | 0.55967689329689  |
| O | 0.86163915901072  | 1.90462158155821  | 1.63902108948147  |
| O | 0.12331550792504  | 2.99604959138692  | -0.08000238108021 |
| N | -3.42370070440901 | -1.07500032364425 | 0.11882862261771  |
| O | -4.01739496261297 | -1.57608547219571 | -0.82044565092904 |
| O | -3.76384473348853 | -1.15858361484949 | 1.28859173043861  |
| C | 2.32216548225168  | 0.50668615239840  | -0.84602757343956 |
| C | 1.68495185657984  | -1.00667999431007 | 0.97780475199370  |
| C | 3.43417735663478  | -0.46626733592081 | -1.20254877023368 |
| H | 2.68429772862763  | 1.24506073158222  | -0.13310690531264 |
| H | 1.93797056607437  | 1.00539017707455  | -1.73397277539716 |
| C | 2.82606047641769  | -1.91440554618481 | 0.54772365312413  |
| H | 2.01409747859106  | -0.29004943662851 | 1.72428578683408  |

|   |                   |                   |                   |
|---|-------------------|-------------------|-------------------|
| H | 0.85140618149453  | -1.58809781989878 | 1.36761016816422  |
| H | 4.28475403509789  | 0.08240119486391  | -1.60251404694692 |
| H | 3.08249343854487  | -1.17854797662707 | -1.95809714521789 |
| H | 3.24171696648403  | -2.41992195616241 | 1.41701843713636  |
| H | 2.45751172739454  | -2.66801655628862 | -0.15891422042745 |
| N | 1.20941999335062  | -0.24212051407139 | -0.20494905186290 |
| O | 3.88198211097192  | -1.16570491516080 | -0.04683603412251 |
| H | 0.85031180875218  | -0.91098263517404 | -0.88744920121214 |
| O | -0.76193800357346 | 0.81725505417997  | -1.24869774172043 |
| N | -1.99579425220424 | 0.08709857184098  | -1.38632010308070 |

## TS2

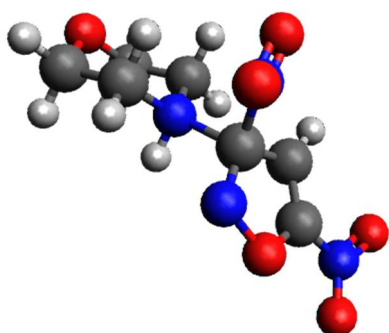

Imaginary mode -206.55

E = -943.23226956 Eh

ZPE = 0.19894044 Eh

G<sub>298</sub> = -943.07308742 Eh

|   |                   |                   |                   |
|---|-------------------|-------------------|-------------------|
| C | -2.25530925810749 | -0.33007430217656 | -0.03713765594852 |
| C | -1.19896948822222 | 0.01246477452077  | 0.72055203922633  |
| C | -0.23766691034106 | 0.50707408827252  | -0.25744724673977 |
| O | -2.09484146598267 | -0.11891563465239 | -1.33106015412569 |
| H | -1.09559807236273 | -0.04026905747118 | 1.78784659297479  |
| N | -0.78236020215352 | 0.46239281805511  | -1.49819929897316 |

|   |                   |                   |                   |
|---|-------------------|-------------------|-------------------|
| N | 0.34845663232436  | 1.97663234082676  | 0.14584791107778  |
| O | 0.72579833440584  | 2.11600927561823  | 1.29757978243310  |
| O | 0.31546507230498  | 2.85097675652283  | -0.68995896340550 |
| N | -3.51581248179050 | -0.89125208191063 | 0.37675375704485  |
| O | -4.29866129815588 | -1.24060755311846 | -0.49402227746778 |
| O | -3.71273315066136 | -0.98242064040420 | 1.58065838149574  |
| C | 2.34522465694228  | 0.32057856896756  | -0.96584418562673 |
| C | 1.69075184317820  | -0.84880234311135 | 1.09196983168394  |
| C | 3.51777158754424  | -0.63917319311728 | -1.07865526514221 |
| H | 2.64189474704585  | 1.19939295485499  | -0.39738716834775 |
| H | 1.98258646689222  | 0.61758888780971  | -1.94749196954267 |
| C | 2.89207211909215  | -1.75626014530482 | 0.88662964993503  |
| H | 1.94499099561996  | 0.01257646368816  | 1.70305311705709  |
| H | 0.87287424979391  | -1.39862118848238 | 1.55286451683677  |
| H | 4.35927671815470  | -0.12713026049876 | -1.54094335652470 |
| H | 3.24296465390968  | -1.50156991764311 | -1.69717664186542 |
| H | 3.28340010540188  | -2.06630728613793 | 1.85341905446599  |
| H | 2.59464870744055  | -2.64921475193178 | 0.32399585727696  |
| N | 1.22767752491333  | -0.34258585126527 | -0.23201992522973 |
| O | 3.94074331607002  | -1.07817140830814 | 0.20438726929012  |
| H | 0.92608459674329  | -1.14280131360239 | -0.79096365185886 |



Pr1-H<sup>+</sup> + NO<sub>2</sub><sup>-</sup>

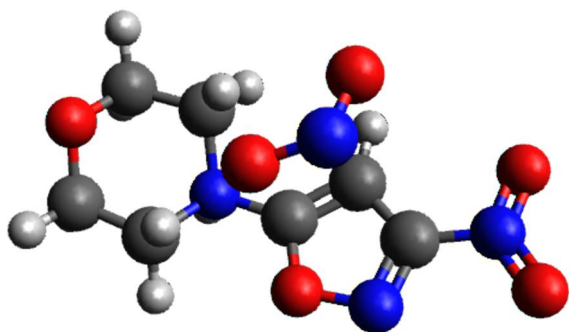

E = -943.26646062 Eh

ZPE = 0.19901296 Eh

G<sub>298</sub> = -943.10980071 Eh

|   |                   |                   |                   |
|---|-------------------|-------------------|-------------------|
| C | -2.21198728468968 | -0.24390086898867 | -0.20087721123733 |
| C | -1.13540548808335 | -0.60218550916430 | 0.63791815458638  |
| C | -0.14174038190255 | -0.75426048866163 | -0.26257946611839 |
| H | -1.11955957516692 | -0.68891413483468 | 1.70690762427785  |
| N | -0.34030785577297 | 2.60310467081606  | 0.27177110334227  |
| O | 0.67781540559221  | 2.11000027211123  | -0.28114604555749 |
| O | -0.51757204478582 | 2.28847076424326  | 1.46716148831489  |
| N | -3.56149299039983 | 0.10445425196009  | 0.22519817018922  |
| O | -4.36372704969512 | 0.43468763824726  | -0.62748431005071 |
| O | -3.77687786926462 | 0.04385853937560  | 1.42358694080546  |
| C | 2.09746907581523  | -0.49862614042829 | -1.26218350611239 |
| C | 1.78120140430870  | -0.57063411413299 | 1.22931610137749  |
| C | 3.56179094702508  | -0.76389492649303 | -0.99465034304372 |
| H | 1.87358663175838  | 0.56280374880945  | -1.28850371471140 |
| H | 1.77231670236680  | -0.98730331852305 | -2.17515510247630 |
| C | 3.26878664481781  | -0.83356003032055 | 1.31782708801870  |
| H | 1.54029871938179  | 0.49007402754135  | 1.25390185130646  |

|   |                   |                   |                   |
|---|-------------------|-------------------|-------------------|
| H | 1.24170572138148  | -1.11230847738365 | 2.00138710742237  |
| H | 4.13936688702944  | -0.27297191266531 | -1.77524919869152 |
| H | 3.77541702494003  | -1.83887604910248 | -1.02116294397239 |
| H | 3.63311981932090  | -0.39874020872952 | 2.24642019289696  |
| H | 3.47379947616996  | -1.91055957294455 | 1.32603630264061  |
| N | 1.25829647661757  | -1.06800801688259 | -0.11770974643375 |
| O | 3.97000439190156  | -0.21566772976541 | 0.24937053197312  |
| H | 1.36174104901052  | -2.08877526168890 | -0.13517126338759 |
| O | -0.57959815909326 | -0.54658859667364 | -1.51548558629230 |
| N | -1.90944767858338 | -0.20338855572104 | -1.47107421906650 |

**Pr2-H<sup>+</sup>+NO<sub>2</sub><sup>-</sup>**

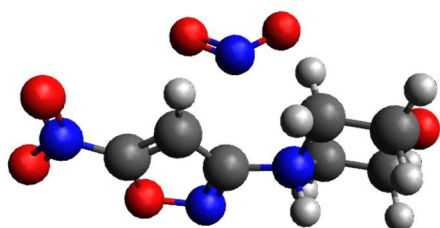

E = -943.20469953 Eh

ZPE = 0.19860373 Eh

G<sub>298</sub> = -943.04891206 Eh

|   |                   |                   |                   |
|---|-------------------|-------------------|-------------------|
| C | -2.31609572862285 | -0.27987124533183 | -0.21136039900244 |
| C | -1.20215730495764 | -0.50417959982584 | 0.52398506559245  |
| C | -0.21688002994065 | -0.56593585670432 | -0.48097089663057 |
| O | -2.05407013274792 | -0.24949773855658 | -1.53104898846902 |
| H | -1.11596663041806 | -0.52454817995023 | 1.59210603538584  |
| N | -0.69239439377619 | -0.46041526661668 | -1.69189744390572 |
| N | 0.23783868793182  | 1.80012222396474  | 0.76597763254706  |
| O | 1.36992448530655  | 2.28546607951597  | 1.00539653596667  |
| O | -0.76640512392446 | 2.49479665242675  | 0.86444018028981  |

|   |                   |                   |                   |
|---|-------------------|-------------------|-------------------|
| N | -3.66926909818503 | -0.03278066946826 | 0.21511551467479  |
| O | -4.49455834195756 | 0.20938585323681  | -0.64716135772613 |
| O | -3.86718581938946 | -0.10103009489299 | 1.41946053663216  |
| C | 2.10811812220356  | 0.12547447413926  | -1.12855123348529 |
| C | 1.73172126514702  | -0.94161077392741 | 1.04660535843953  |
| C | 3.51925720906391  | -0.43016914435240 | -1.09366064790159 |
| H | 2.02523223776778  | 1.07149333721387  | -0.59315294311141 |
| H | 1.71545752784466  | 0.20374316810939  | -2.13838081998735 |
| C | 3.16749677851641  | -1.43629746631763 | 0.99404167555357  |
| H | 1.66354395870889  | 0.06674818371659  | 1.45166572619281  |
| H | 1.09662546848858  | -1.63208323029316 | 1.59777451022953  |
| H | 4.18697506071094  | 0.27143232895217  | -1.58931453294633 |
| H | 3.57459135593235  | -1.39025060295904 | -1.63133608429982 |
| H | 3.56975923109718  | -1.44624307271987 | 2.00553216263133  |
| H | 3.20596699223797  | -2.46523657547957 | 0.60079555575253  |
| N | 1.21272362495182  | -0.85051555168482 | -0.36774758939027 |
| O | 3.99502876370397  | -0.59095953641007 | 0.22759813598332  |
| H | 1.34817183430637  | -1.76738769578485 | -0.80635168901544 |

**Pr1 (2zg)**

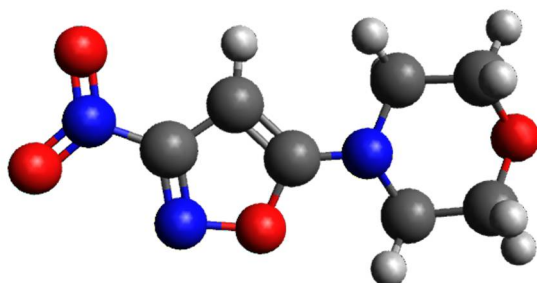

$E = -737.48930313 \text{ Eh}$

$ZPE = 0.17511634 \text{ Eh}$

$G_{298} = -737.35055135 \text{ Eh}$

|   |                   |                   |                   |
|---|-------------------|-------------------|-------------------|
| C | -2.27632376156043 | -0.38877604101243 | -0.12066734030826 |
| C | -1.15906713992489 | -0.49496733600922 | 0.71357992506136  |
| C | -0.11689311312173 | -0.50913774002167 | -0.19440033331559 |
| H | -1.12835359993024 | -0.54843518604845 | 1.78436396924500  |
| N | -3.66598512583114 | -0.32540593495601 | 0.31528205343988  |
| O | -4.53880216227591 | -0.28648676516622 | -0.53387377378501 |
| O | -3.86042613571321 | -0.31568616810092 | 1.52106581418306  |
| C | 2.10053053781625  | -0.20053570007131 | -1.15142293284033 |
| C | 1.76216472190547  | -0.49602653170407 | 1.29274015602986  |
| C | 3.48041156301356  | -0.80491723622006 | -0.95909158128172 |
| H | 2.16820408308771  | 0.89259611976623  | -1.16823773129949 |
| H | 1.68942836423875  | -0.54031169982579 | -2.09876254035119 |
| C | 3.15156690849435  | -1.09900593477598 | 1.34135640632076  |
| H | 1.79818563305879  | 0.55955546670880  | 1.58289220303094  |
| H | 1.11583505730391  | -1.02755908609999 | 1.98872069886293  |
| H | 4.17199421131740  | -0.36082183025796 | -1.67250449897427 |
| H | 3.44566052969625  | -1.88865325137932 | -1.12321533510536 |
| H | 3.60944423586434  | -0.88109153678096 | 2.30483672444276  |
| H | 3.09565758931874  | -2.18554694618240 | 1.20424582236021  |
| N | 1.21217948211096  | -0.62265972993731 | -0.05941989980447 |
| O | 3.99249661995562  | -0.53389873406587 | 0.34230439032418  |
| O | -0.62078305751533 | -0.40129895251166 | -1.44981074139148 |
| N | -2.01801544130921 | -0.33069924534742 | -1.40339145484378 |

Pr2

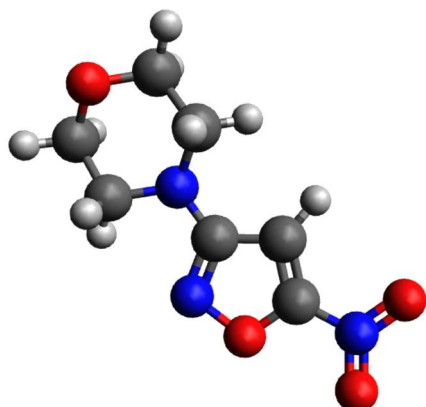

E = -737.48381430 Eh

ZPE = 0.17525233 Eh

G<sub>298</sub> = -737.34492779 Eh

|   |                   |                   |                   |
|---|-------------------|-------------------|-------------------|
| C | -2.31362710806283 | -0.40486065739177 | 0.07854918876408  |
| C | -1.16247751142655 | -0.26986038684354 | 0.76680549115556  |
| C | -0.17169218618667 | -0.64480322368140 | -0.19949660789894 |
| O | -2.12526562585528 | -0.81582677737064 | -1.17304950370218 |
| H | -1.03689874958947 | 0.04473587373618  | 1.78526519278688  |
| N | -0.73678189509338 | -0.95579616156894 | -1.36167373314174 |
| N | -3.66996409861052 | -0.15043664330635 | 0.48677455343376  |
| O | -4.54992757325882 | -0.28853481678503 | -0.34801256073745 |
| O | -3.84100235725828 | 0.19630410917287  | 1.64682723273224  |
| C | 2.00307980302733  | -0.96146320787640 | -1.18764469896723 |
| C | 1.75786562159052  | 0.23519694967665  | 0.95592984552663  |
| C | 3.42540787010303  | -1.28036838201892 | -0.76760466496049 |
| H | 1.99492356053142  | -0.08747148365252 | -1.85067513373195 |
| H | 1.58630845352685  | -1.80579455122387 | -1.73476233665919 |
| C | 3.19647463176112  | -0.14144585660641 | 1.25668319935255  |
| H | 1.72067730592229  | 1.25377268262302  | 0.55097235781112  |
| H | 1.18646047855105  | 0.20737482658103  | 1.88151062624458  |

|   |                  |                   |                   |
|---|------------------|-------------------|-------------------|
| H | 4.06168839552184 | -1.34692977383374 | -1.64795518127267 |
| H | 3.45655347321700 | -2.23674895928946 | -0.23194775248642 |
| H | 3.65776499109857 | 0.63701077608331  | 1.86214489463397  |
| H | 3.23253817701791 | -1.08979589768921 | 1.80532859040217  |
| N | 1.17381256463922 | -0.70683265096861 | -0.00797057965875 |
| O | 3.96329177883366 | -0.25569578776626 | 0.06278158037347  |

### **HNO<sub>2</sub>**

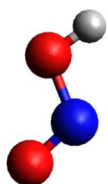

$$E = -205.80629280 \text{ Eh}$$

$$\text{ZPE} = 0.02008253 \text{ Eh}$$

$$G_{298} = -205.80913549 \text{ Eh}$$

|   |                  |                  |                   |
|---|------------------|------------------|-------------------|
| N | 0.78692669316288 | 3.27353197244875 | -0.63587835117346 |
| O | 0.39621643579425 | 2.77272216688187 | 0.60617338450858  |
| O | 1.00212384098457 | 2.40635814783791 | -1.39684529056083 |
| H | 0.24515303005829 | 3.57002771283147 | 1.14326025722572  |

## 5. References

- 1 Volkova, Y. A.; Averina, E. B.; Vasilenko, D. A.; Sedenkova, K. N.; Grishin, Y. K.; Bruheim, P.; Kuznetsova, T. S.; Zefirov, N. S. Unexpected Heterocyclization of Electrophilic Alkenes by Tetranitromethane in the Presence of Triethylamine. Synthesis of 5-Nitroisoxazoles. *J. Org. Chem.* 2019, **84**, 3192.
- 2 Averina, E. B.; Vasilenko, D. A.; Samoilenko, Y. V.; Grishin, Y. K.; Rybakov, V. B.; Kuznetsova, T. S.; Zefirov, N. S. Chemoselective Reduction of Functionalized 5-Nitroisoxazoles: Synthesis of 5-Amino- and 5-[Hydroxy(tetrahydrofuran-2-yl)amino]isoxazoles. *Synthesis* 2014, **46**, 1107.
- 3 Neese, F. Software update: the ORCA program system, version 4.0. *WIREs Comput. Mol. Sci.* 2018, **8**, e1327.
- 4 Becke, A. D. Density-functional thermochemistry. III. The role of exact exchange. *J. Chem. Phys.* 1993, **98**, 5648.
- 5 (a) Grimme, S.; Antony, J.; Ehrlich, S.; Krieg, H. A consistent and accurate ab initio parametrization of density functional dispersion correction (DFT-D) for the 94 elements H-Pu. *J. Chem. Phys.* 2010, **132**, 154104. (b) Grimme, S.; Ehrlich, S.; Goerigk, L. Effect of the Damping Function in Dispersion Corrected Density Functional Theory. *J. Comput. Chem.* 2011, **32**, 1456.
- 6 Weigend, F.; Ahlrichs, R. Balanced basis sets of split valence, triple zeta valence and quadruple zeta valence quality for H to Rn: Design and assessment of accuracy. *Phys. Chem. Chem. Phys.* 2005, **7**, 3297.
- 7 Weigend, F. Accurate Coulomb-fitting basis sets for H to Rn. *Phys. Chem. Chem. Phys.* 2006, **8**, 1057.
- 8 Barone, V.; Cossi, M. Quantum Calculation of Molecular Energies and Energy Gradients in Solution by a Conductor Solvent Model. *J. Phys. Chem. A* 1998, **102**, 1995.
- 9 Grimme, S. Supramolecular Binding Thermodynamics by Dispersion-Corrected Density Functional Theory. *Chem. Eur. J.* 2012, **18**, 9955.
- 10 Hanwell, M. D.; Curtis, D. E.; Lonie, D. C.; Vandermeersch, T.; Zurek, E.; Hutchison, G. R. Avogadro: an advanced semantic chemical editor, visualization, and analysis platform. *J. Cheminf.* 2012, **4**, 4.
- 11 (a) Nikolaienko, T.Y.; Bulavin, L.A. Localized orbitals for optimal decomposition of molecular properties. *Int. J. Quantum Chem.* 2019, **119**, e25798. (b) Nikolaienko, T.Y.; Bulavin, L.A.; Hovorun, D.M. JANPA: An open source cross-platform implementation of the Natural Population Analysis on the Java platform. *Comput. Theor. Chem.* 2014, **1050**, 15.
- 12 <http://www.rdkit.org>

## 6. Copies of NMR Spectra

### Methyl 4-methyl-5-nitroisoxazole-3-carboxylate **1g** ( $^1\text{H}$ NMR)

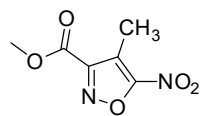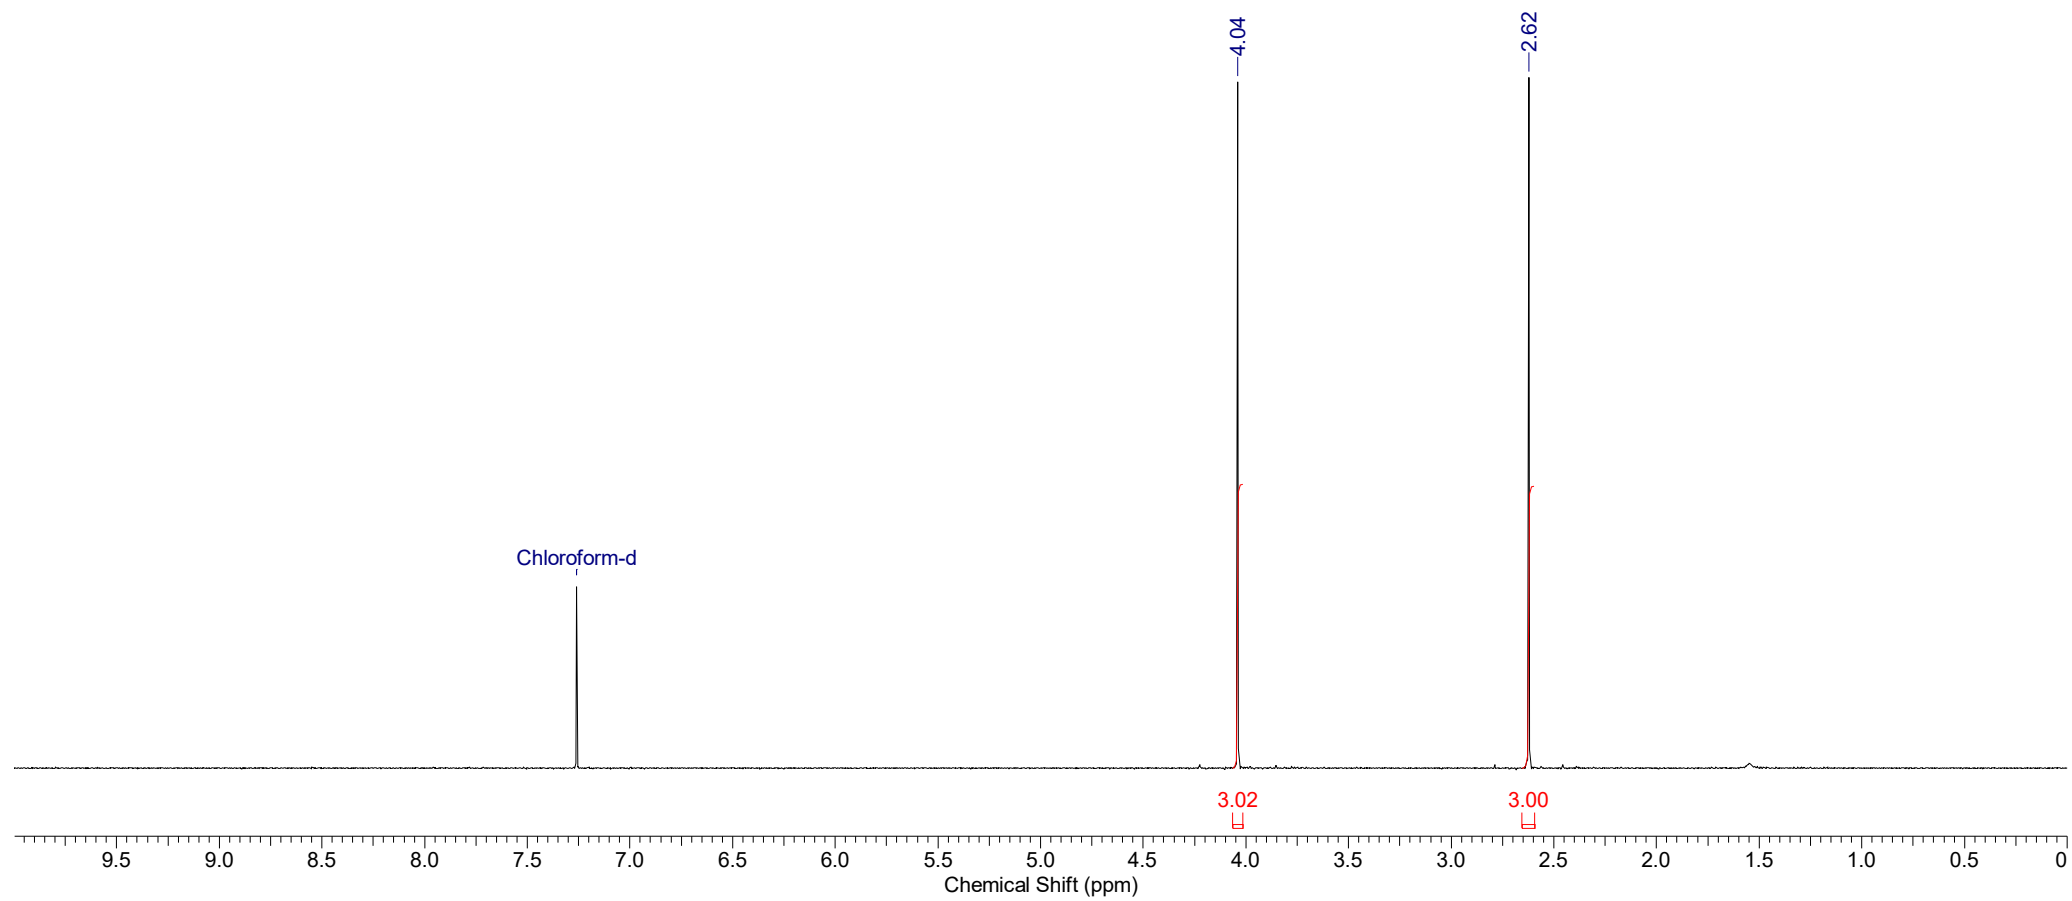



# Methyl 4-methyl-5-nitroisoxazole-3-carboxylate **1g** ( $^{13}\text{C}$ NMR)

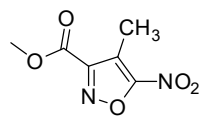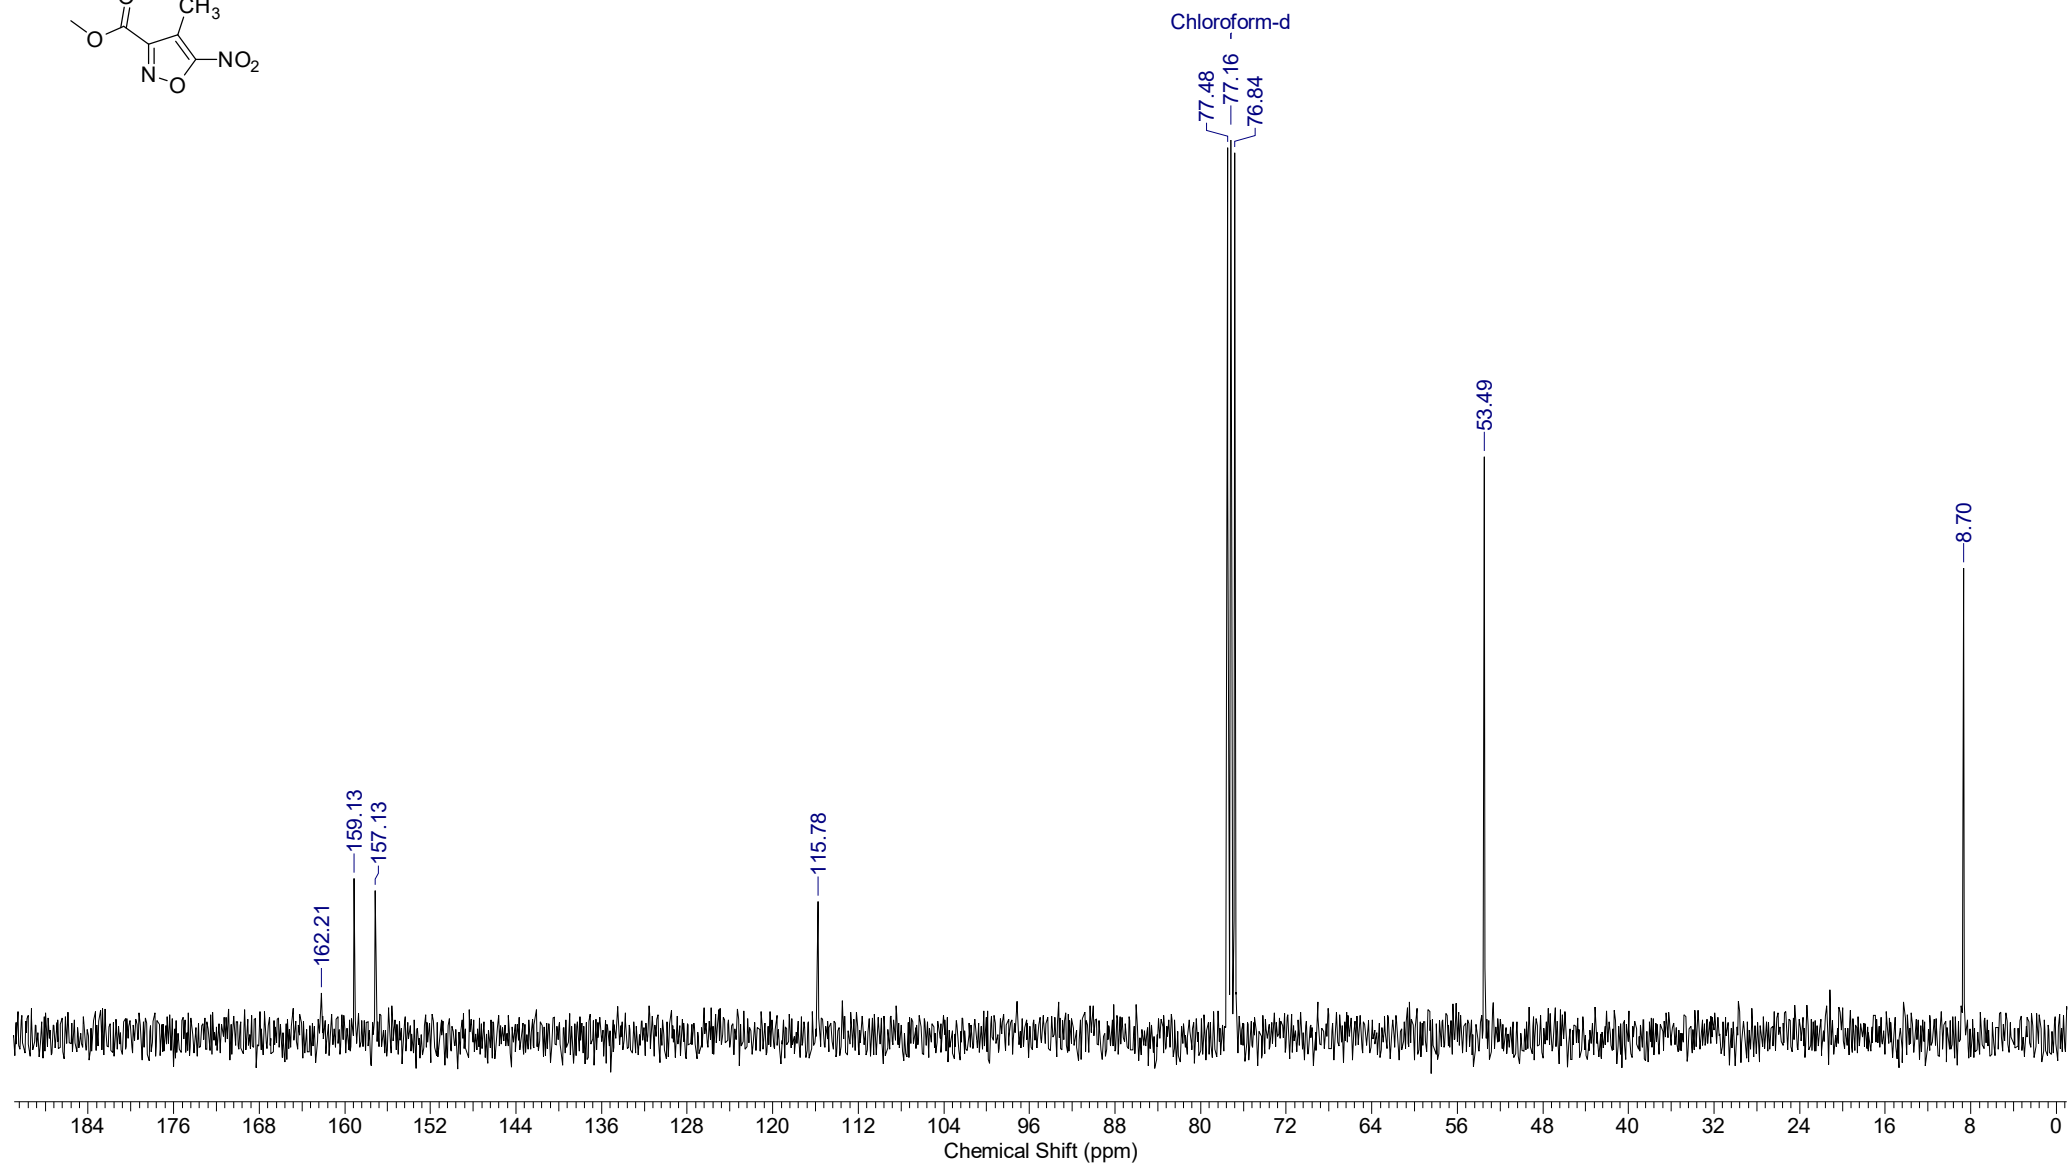

# tert-Butyl 5-morpholinoisoxazole-3-carboxylate **2a** ( $^1\text{H}$ NMR)

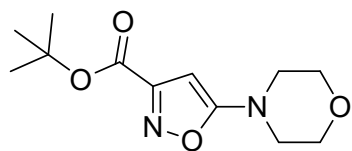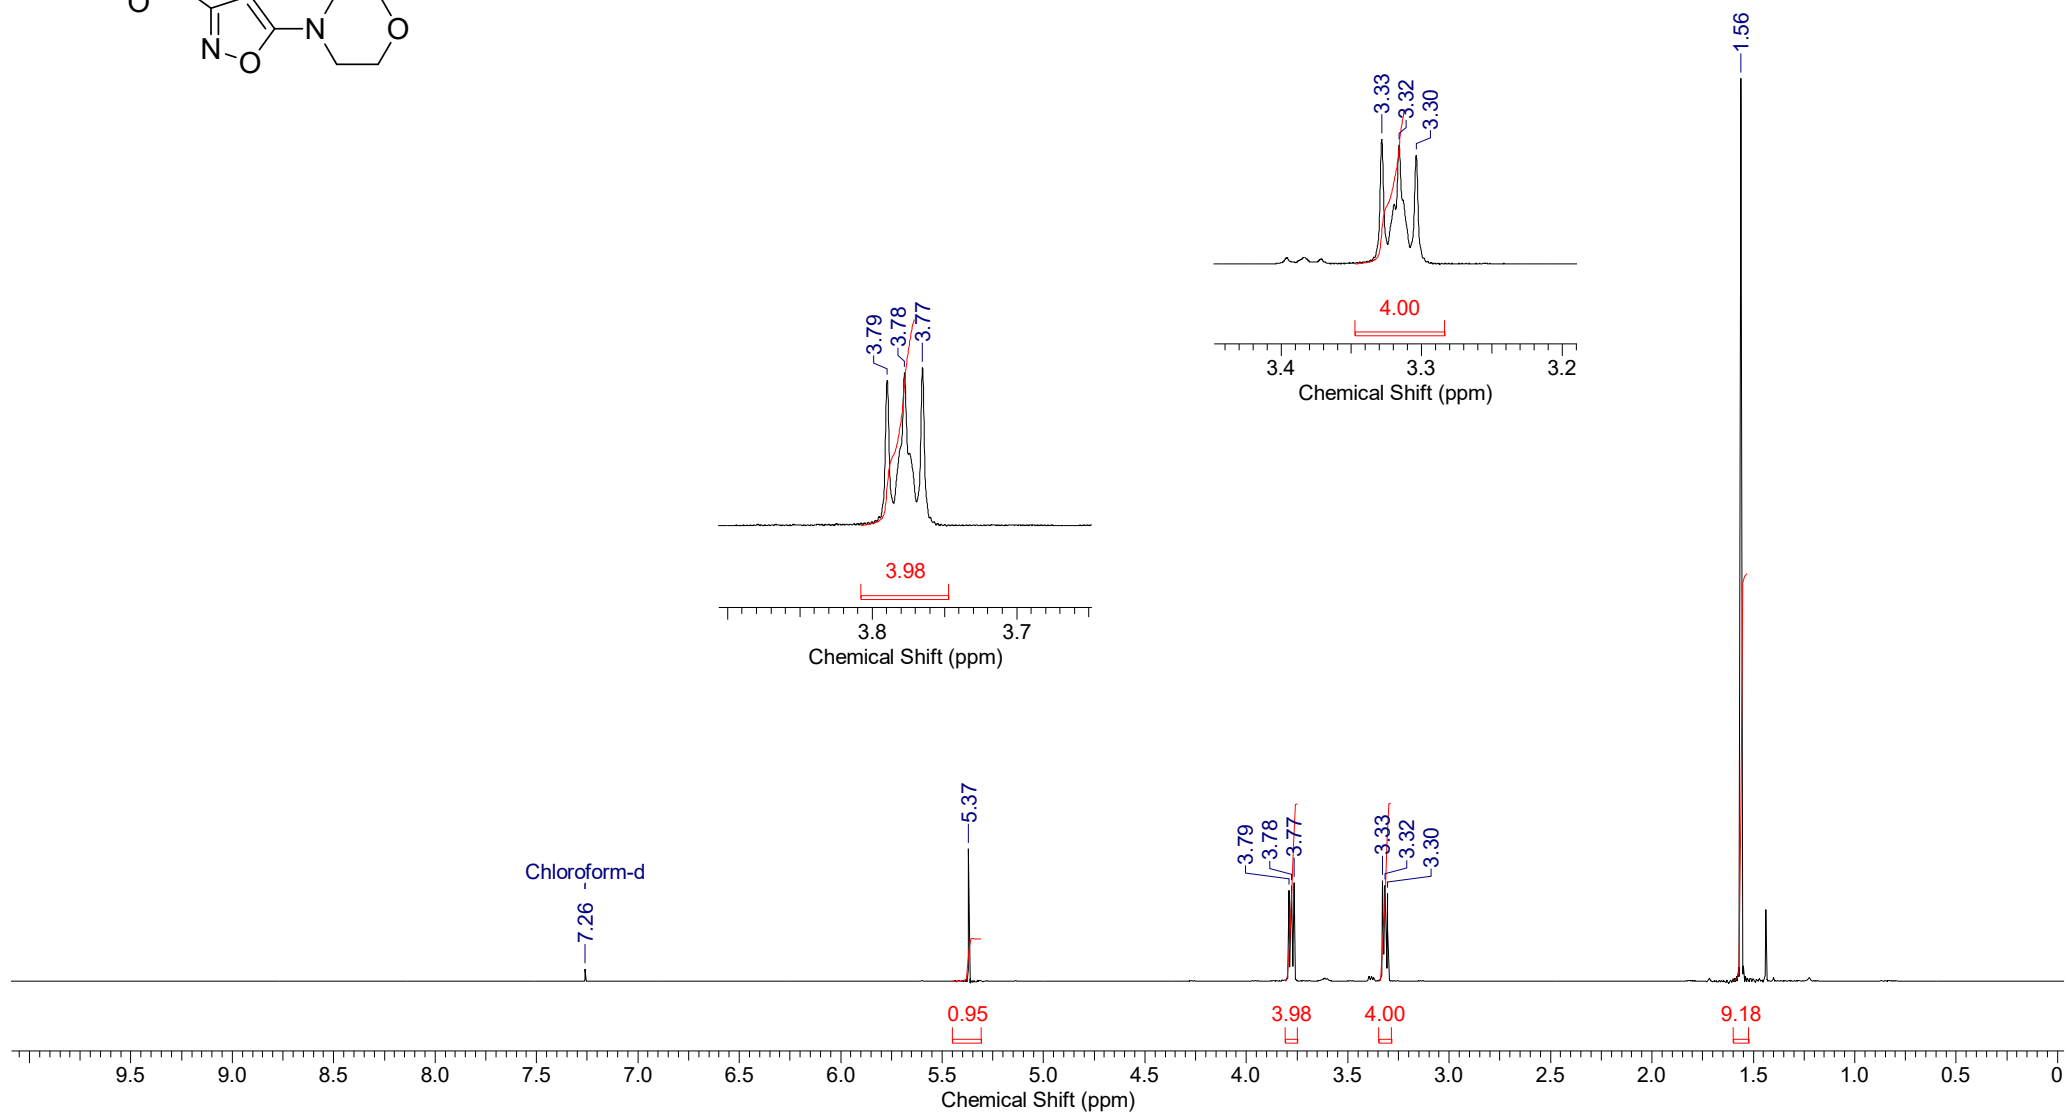

tert-Butyl 5-morpholinoisoxazole-3-carboxylate **2a** ( $^{13}\text{C}$  NMR)

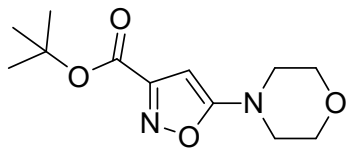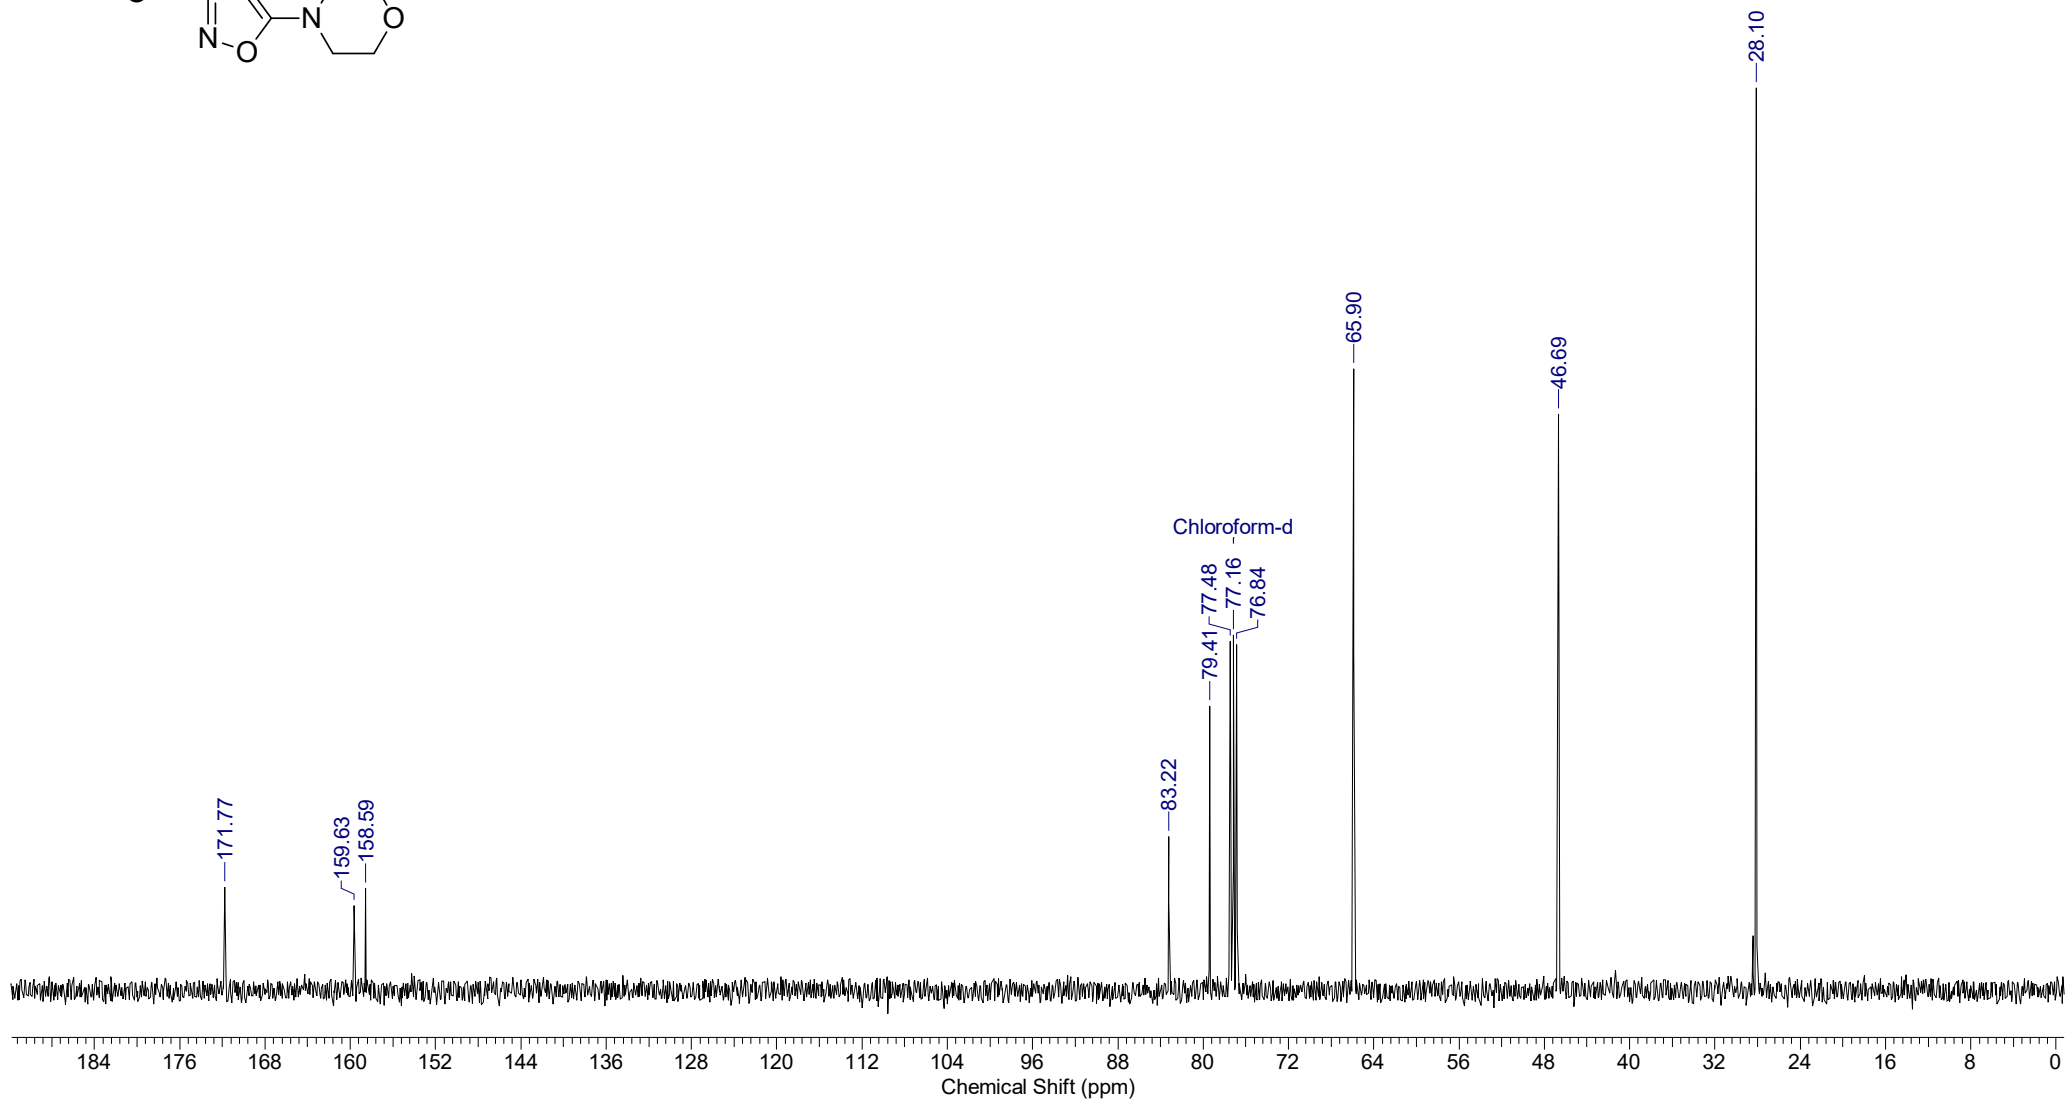



tert-Butyl 5-(butylamino)isoxazole-3-carboxylate **2b** ( $^{13}\text{C}$  NMR)

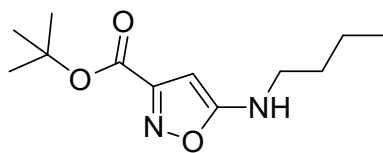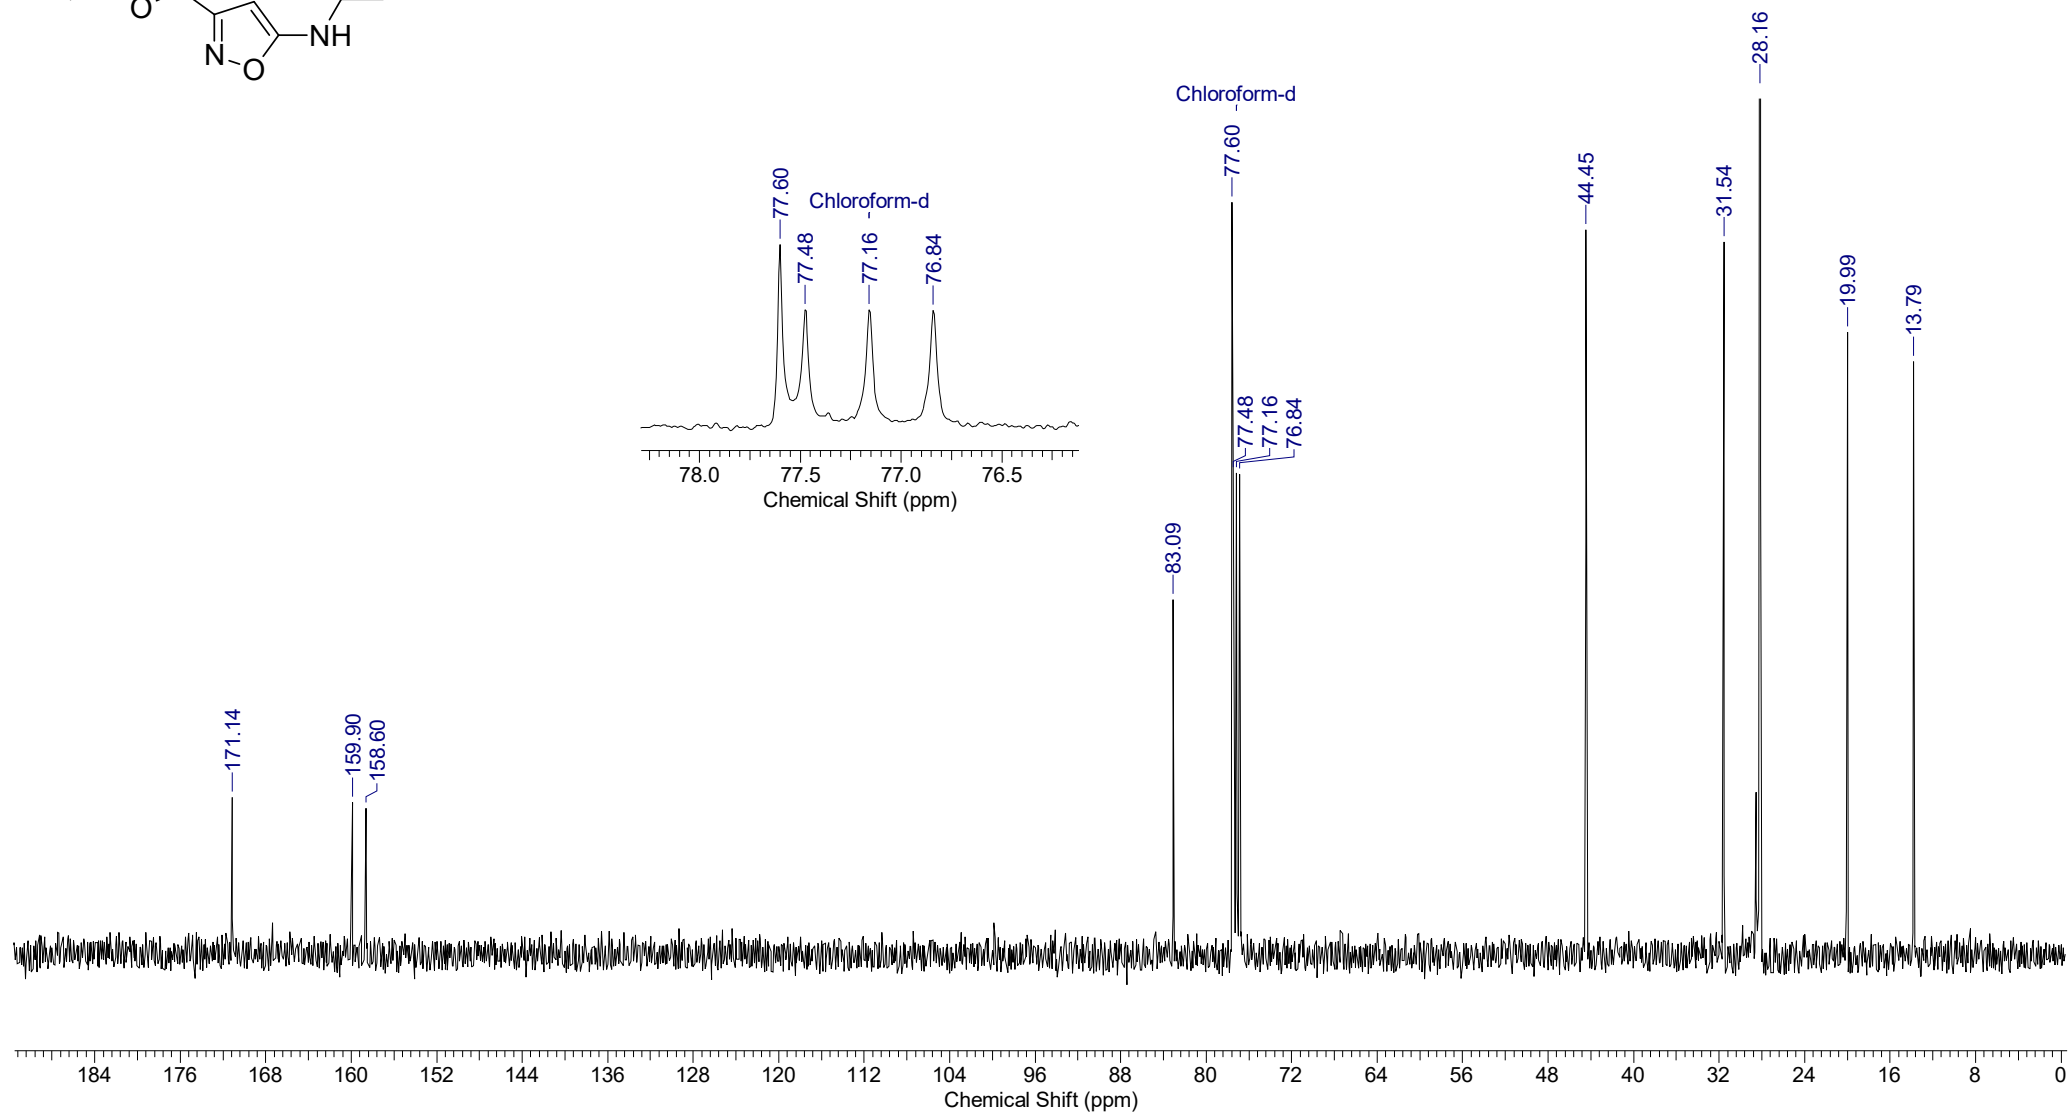

tert-Butyl 5-(diethylamino)isoxazole-3-carboxylate **2c** ( $^1\text{H}$  NMR)

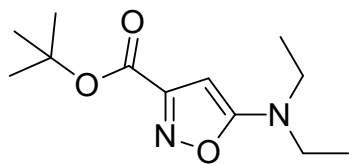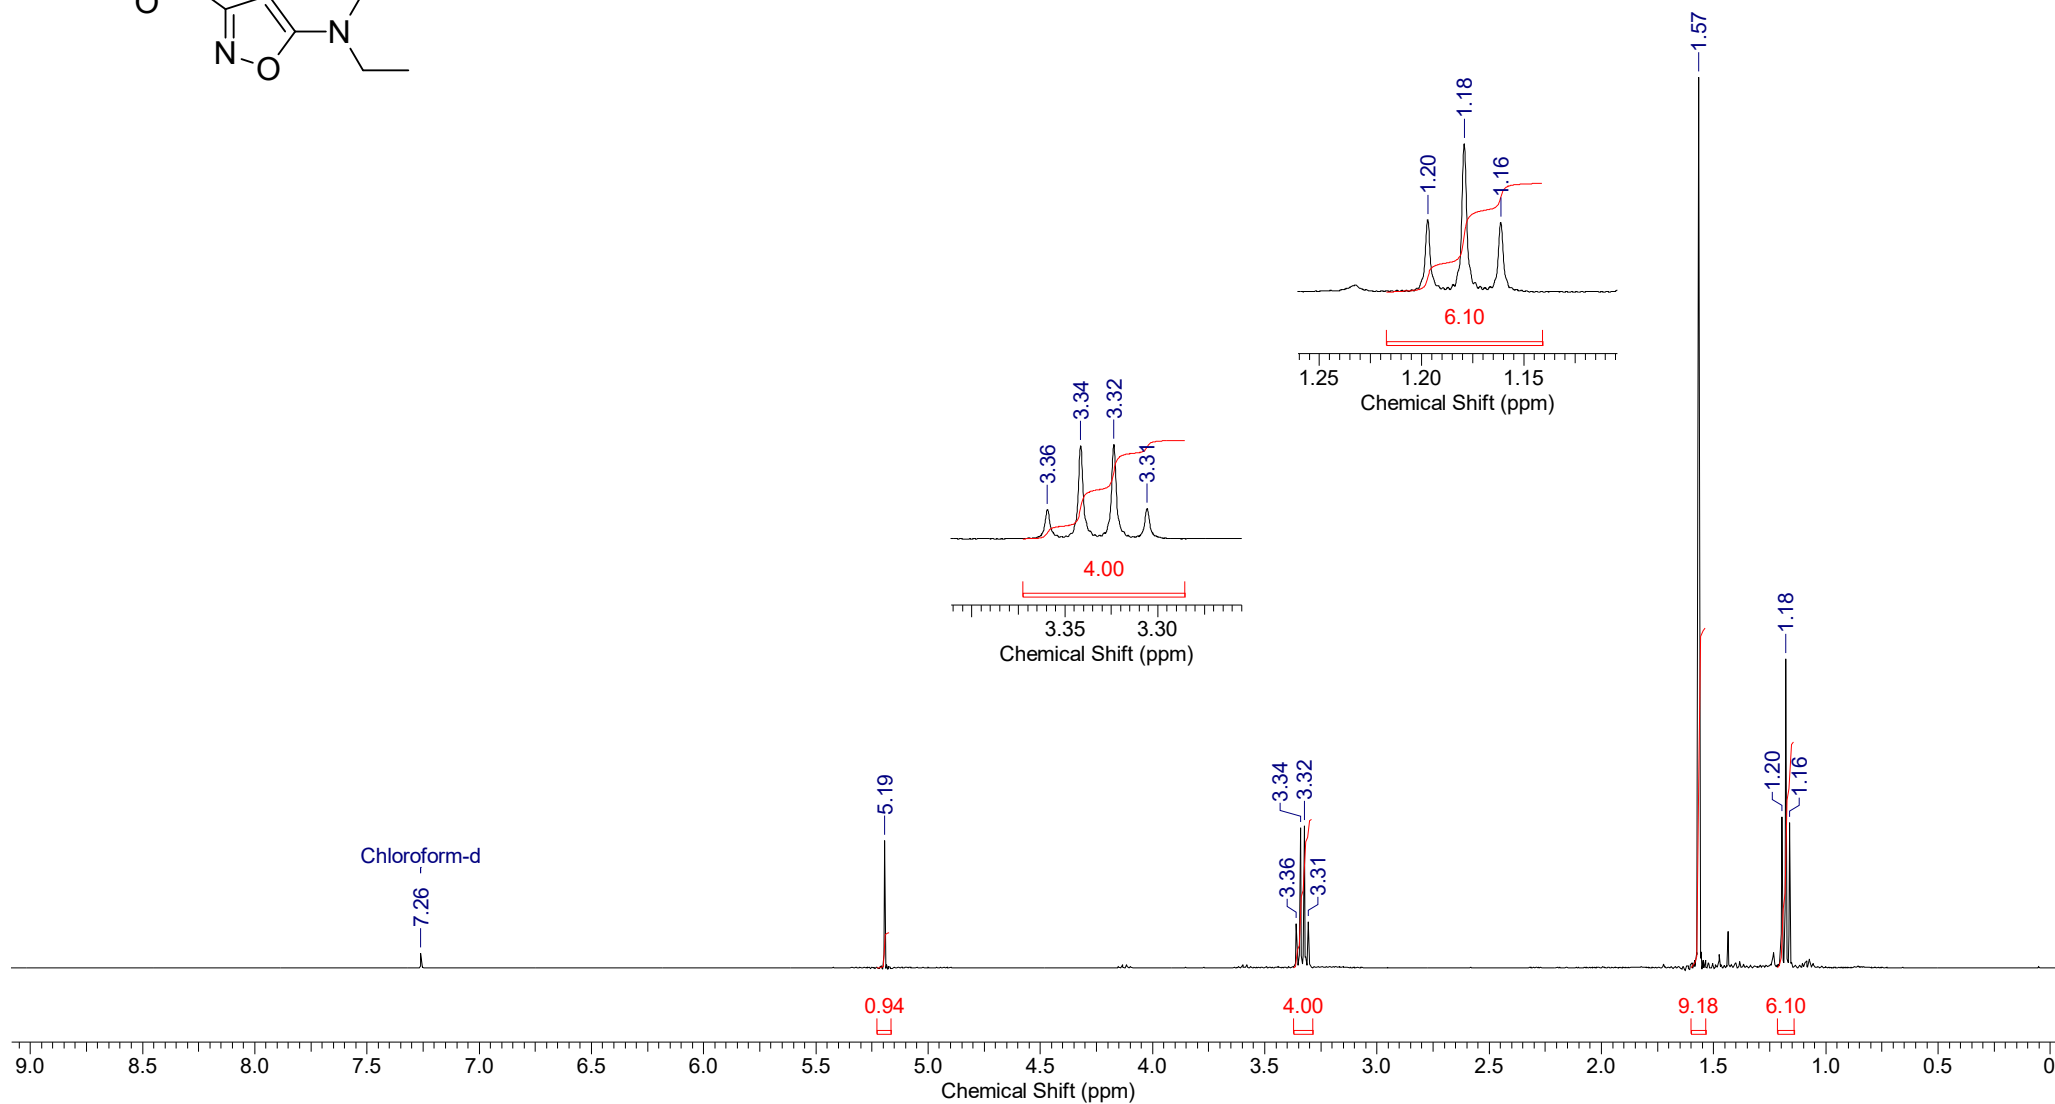

tert-Butyl 5-(diethylamino)isoxazole-3-carboxylate **2c** ( $^{13}\text{C}$  NMR)

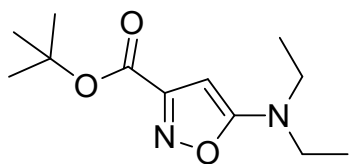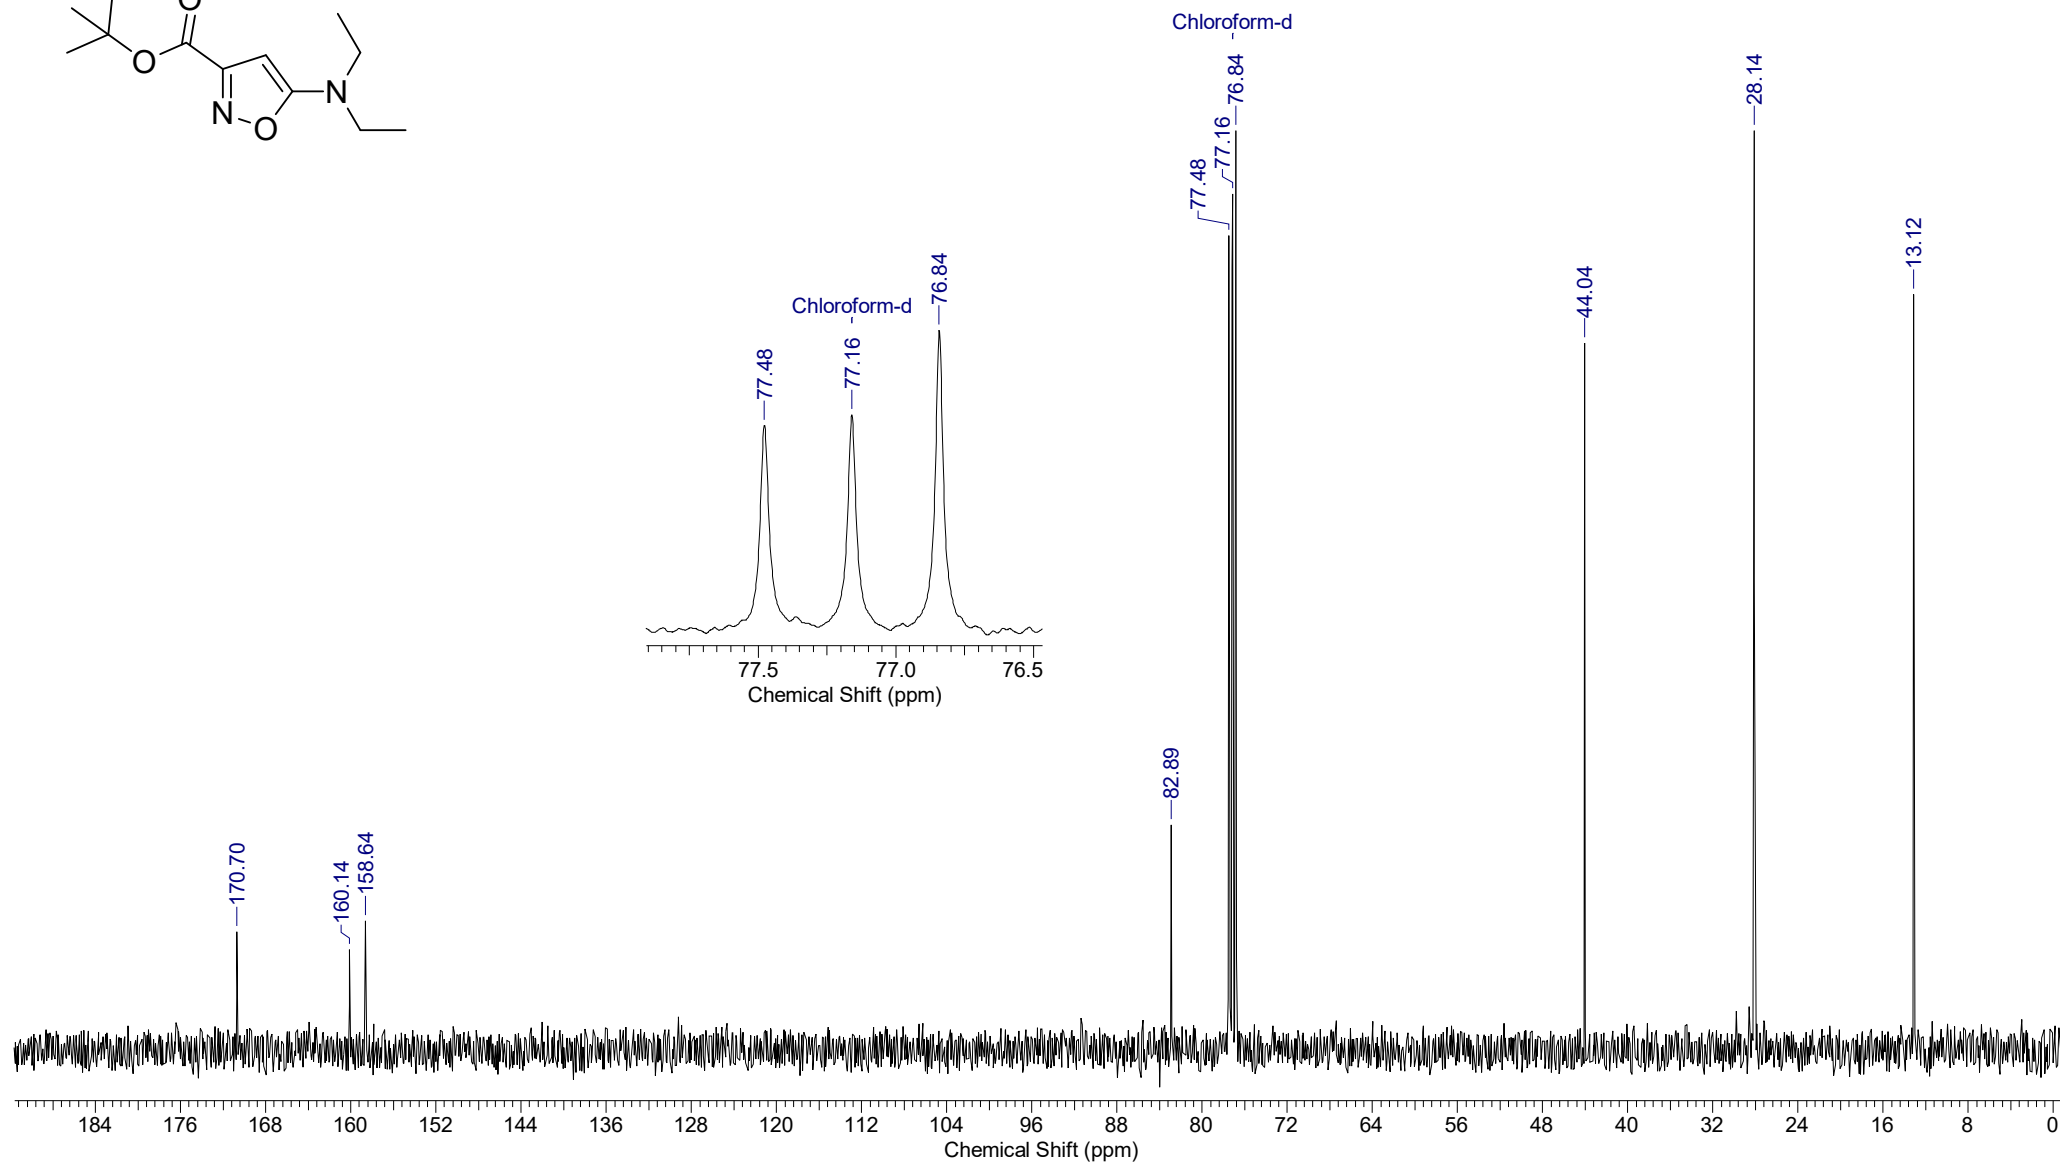

tert-Butyl 5-(diethylamino)isoxazole-3-carboxylate **2c** (APT)

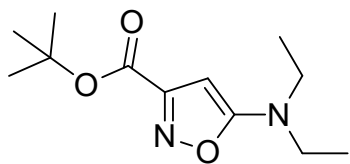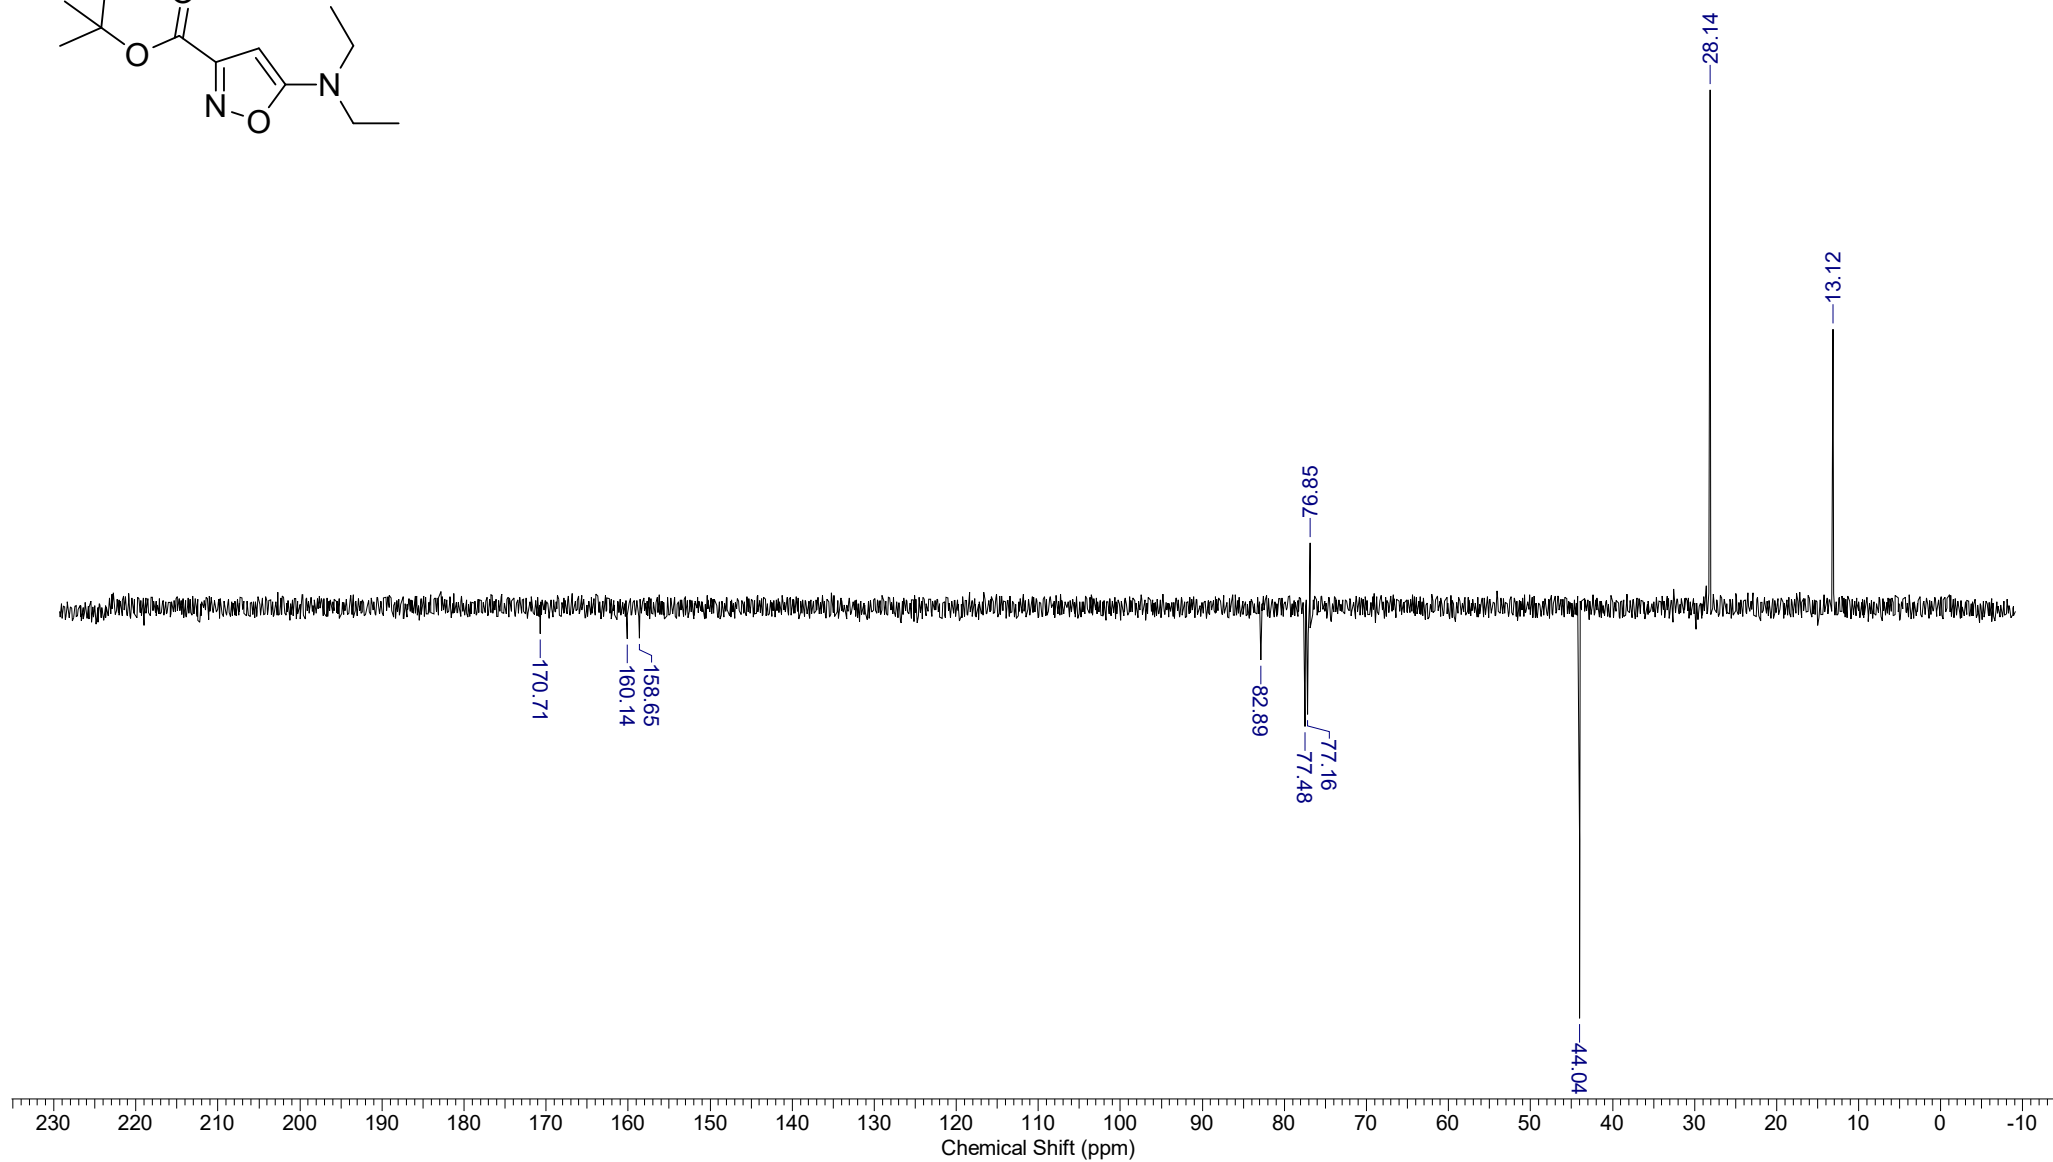



tert-Butyl 5-piperidine-1-ylisoxazole-3-carboxylate **2d** ( $^1\text{H}$  NMR)

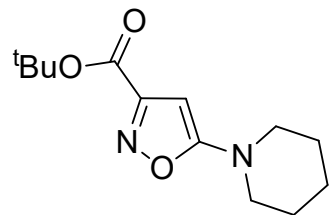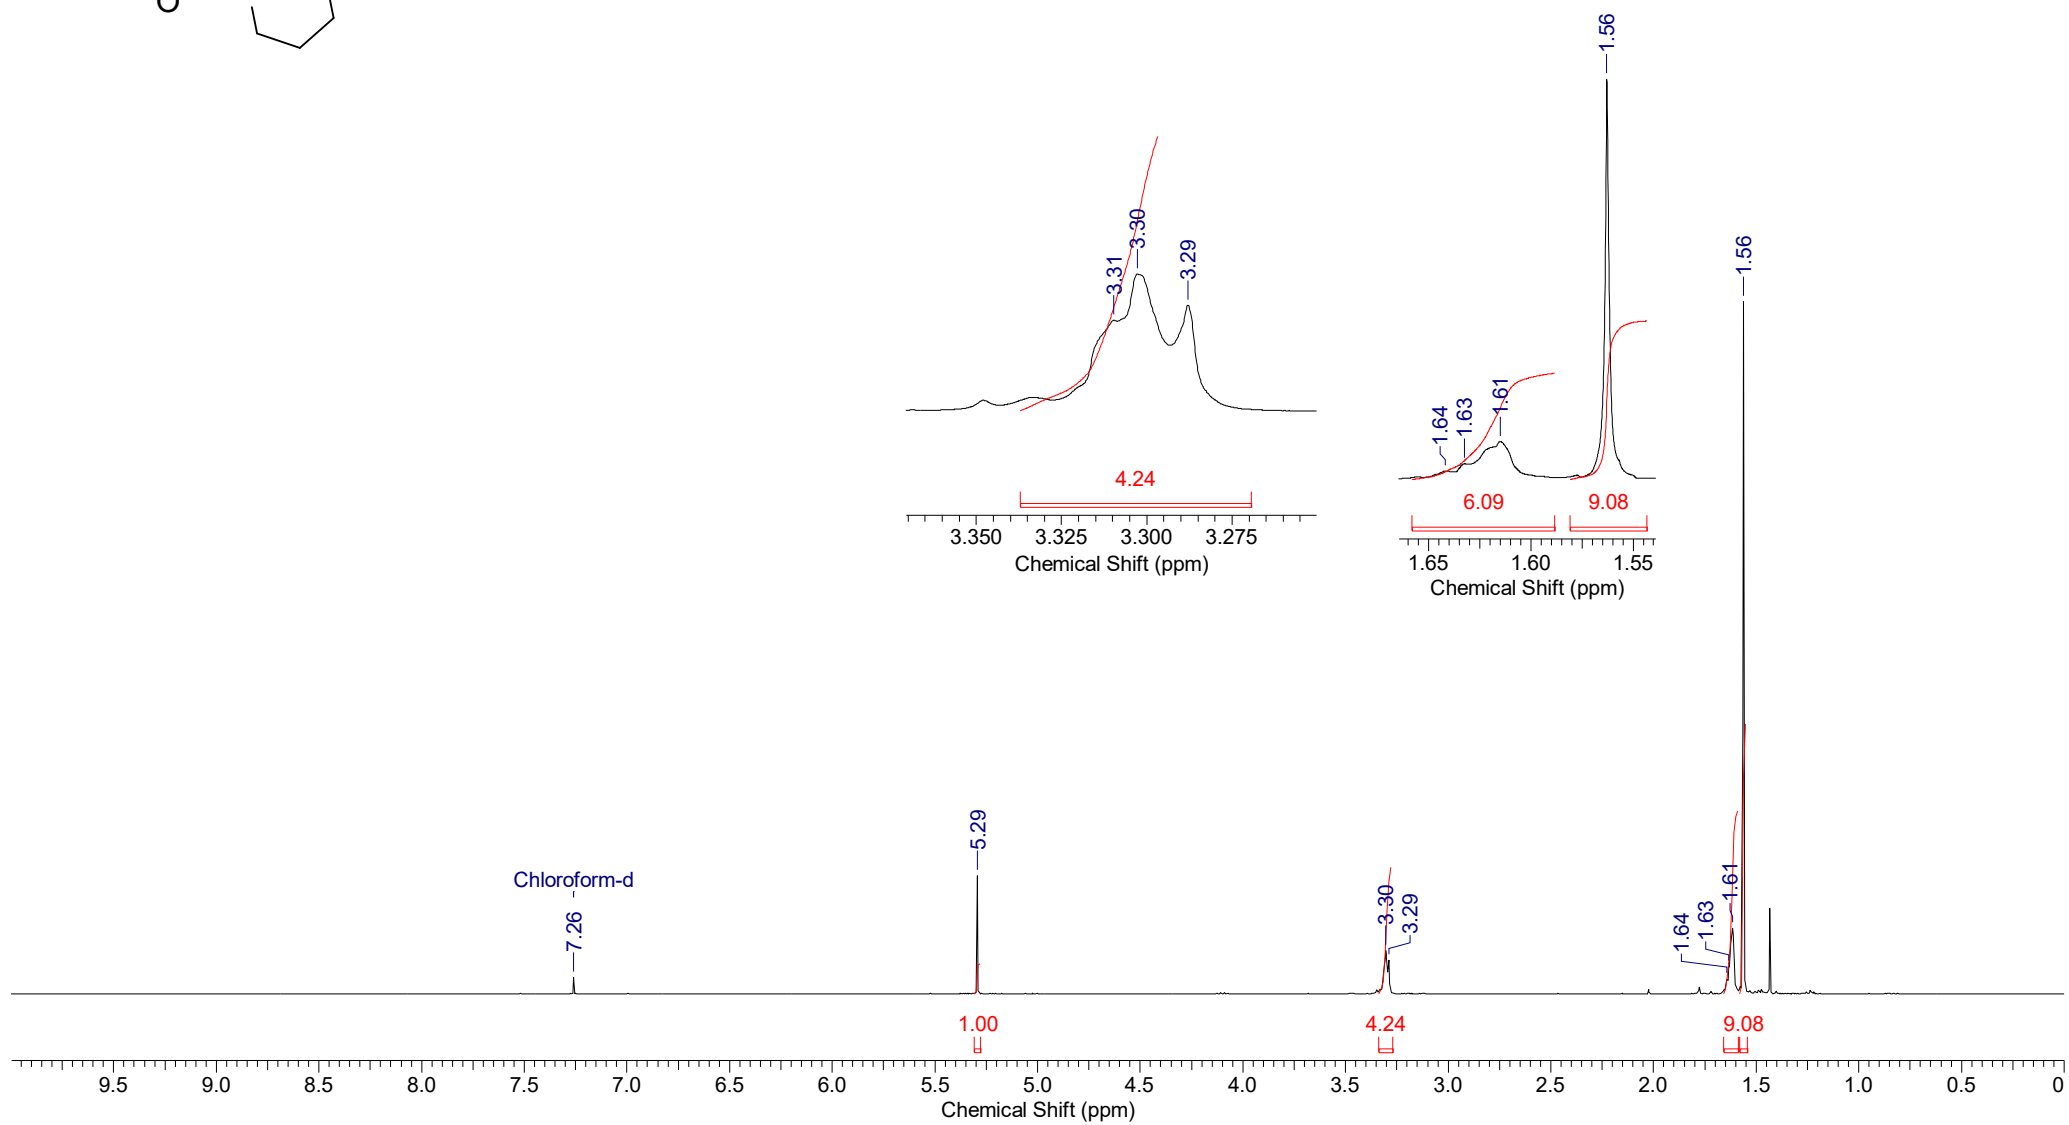

tert-Butyl 5-piperidine-1-ylisoxazole-3-carboxylate **2d** ( $^{13}\text{C}$  NMR)

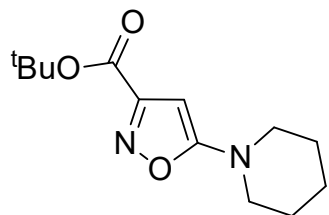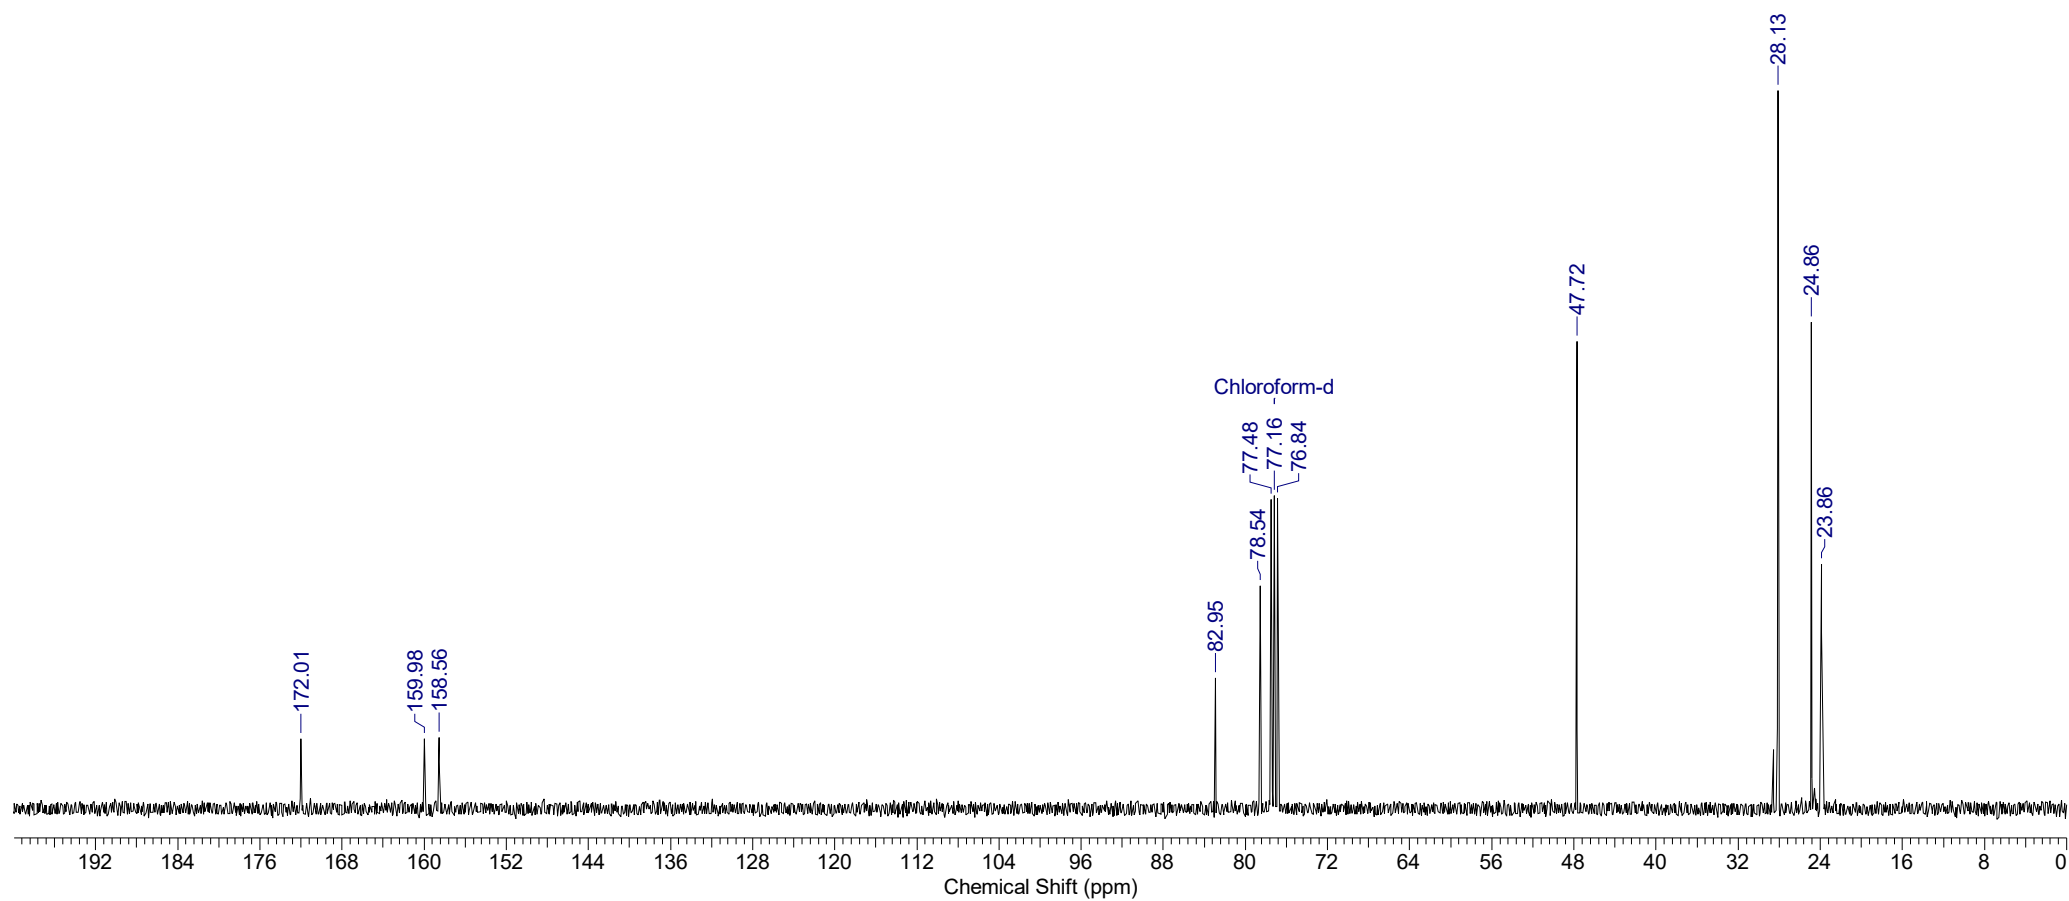

tert-Butyl 5-(benzylamino)isoxazole-3-carboxylate **2e** ( $^1\text{H}$  NMR)

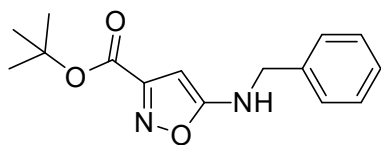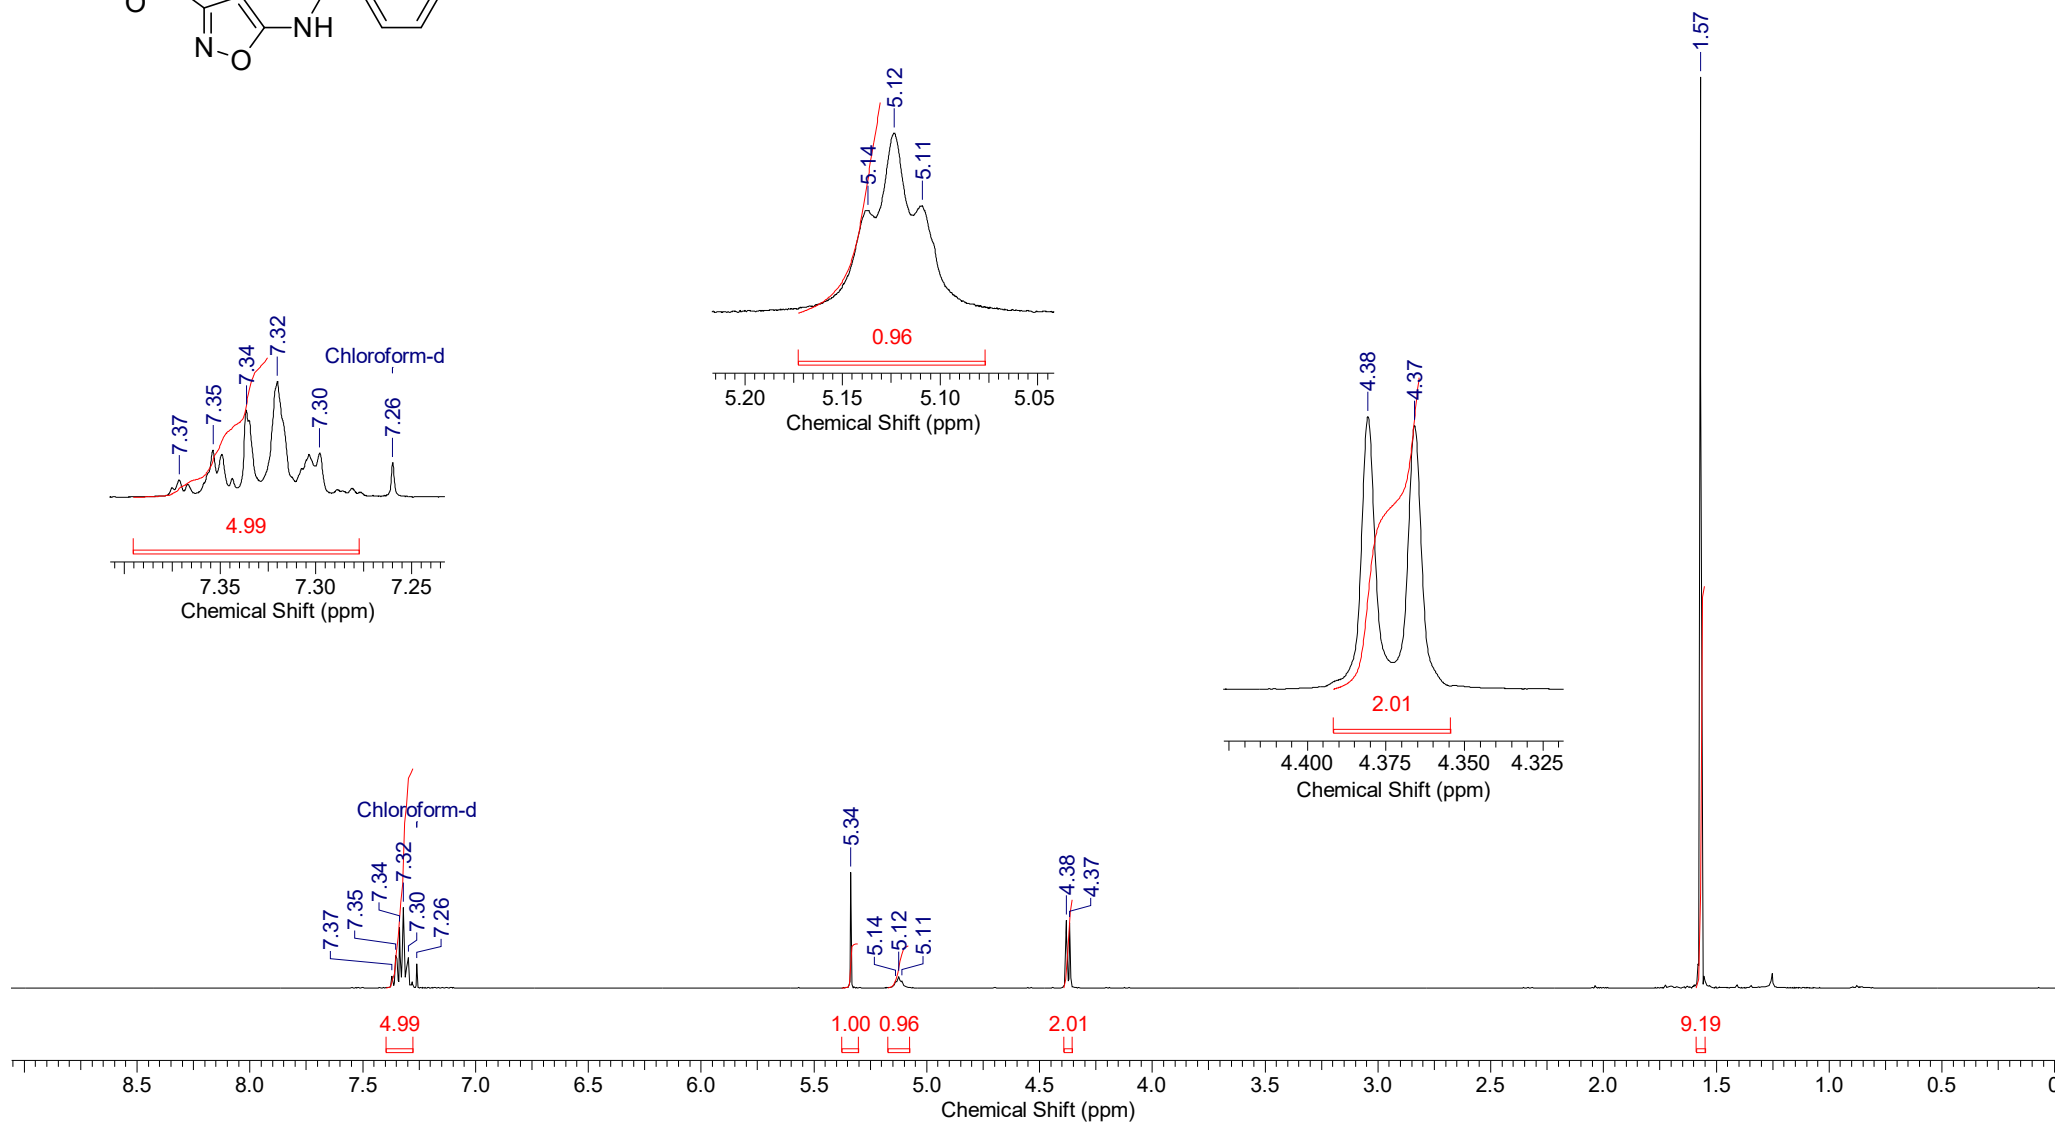

tert-Butyl 5-(benzylamino)isoxazole-3-carboxylate **2e** ( $^{13}\text{C}$  NMR)

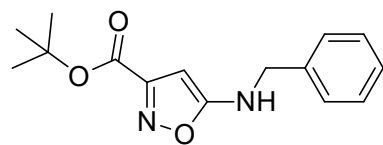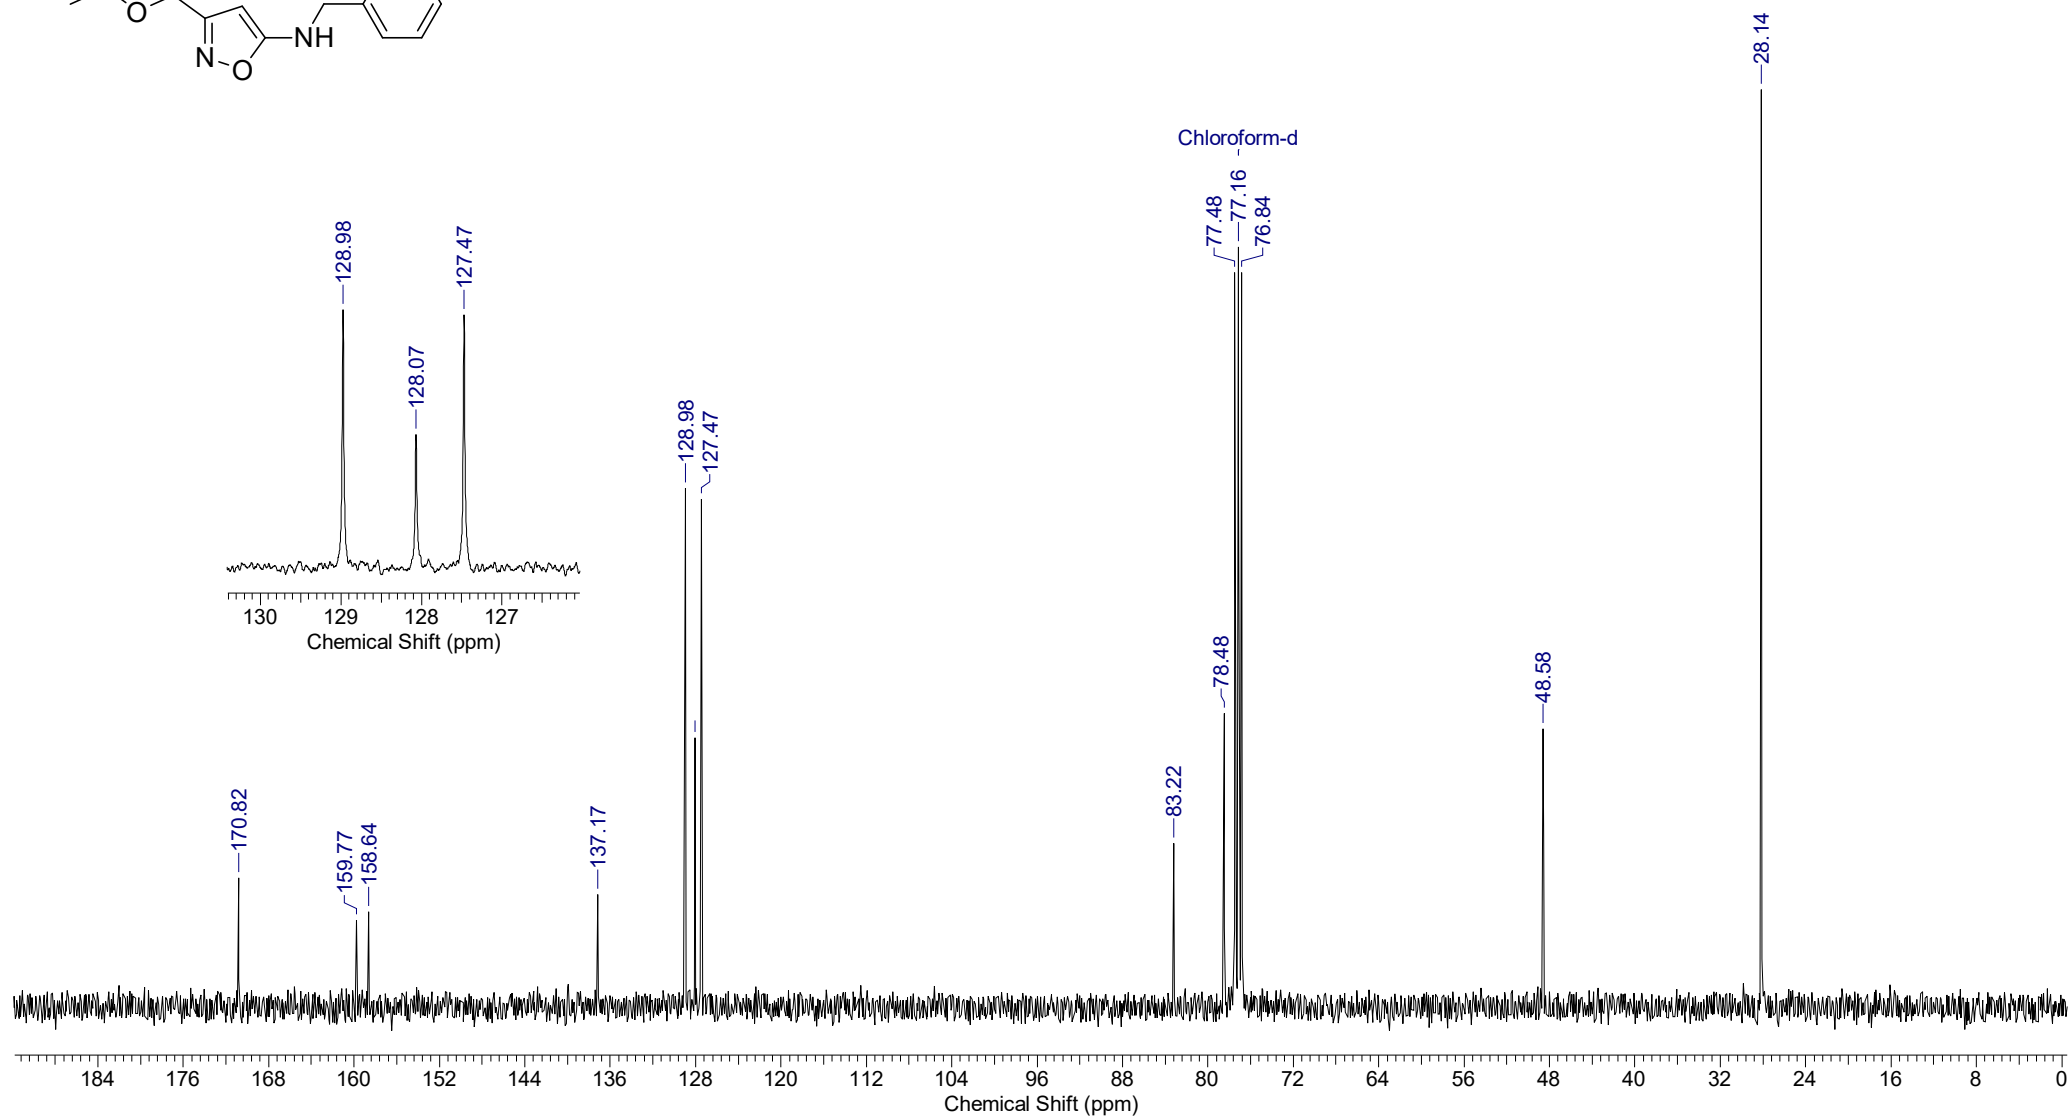

tert-Butyl 5-azidoisoxazole-3-carboxylate **2f** ( $^1\text{H}$  NMR)

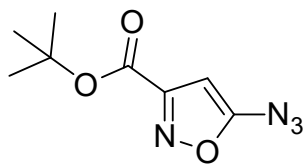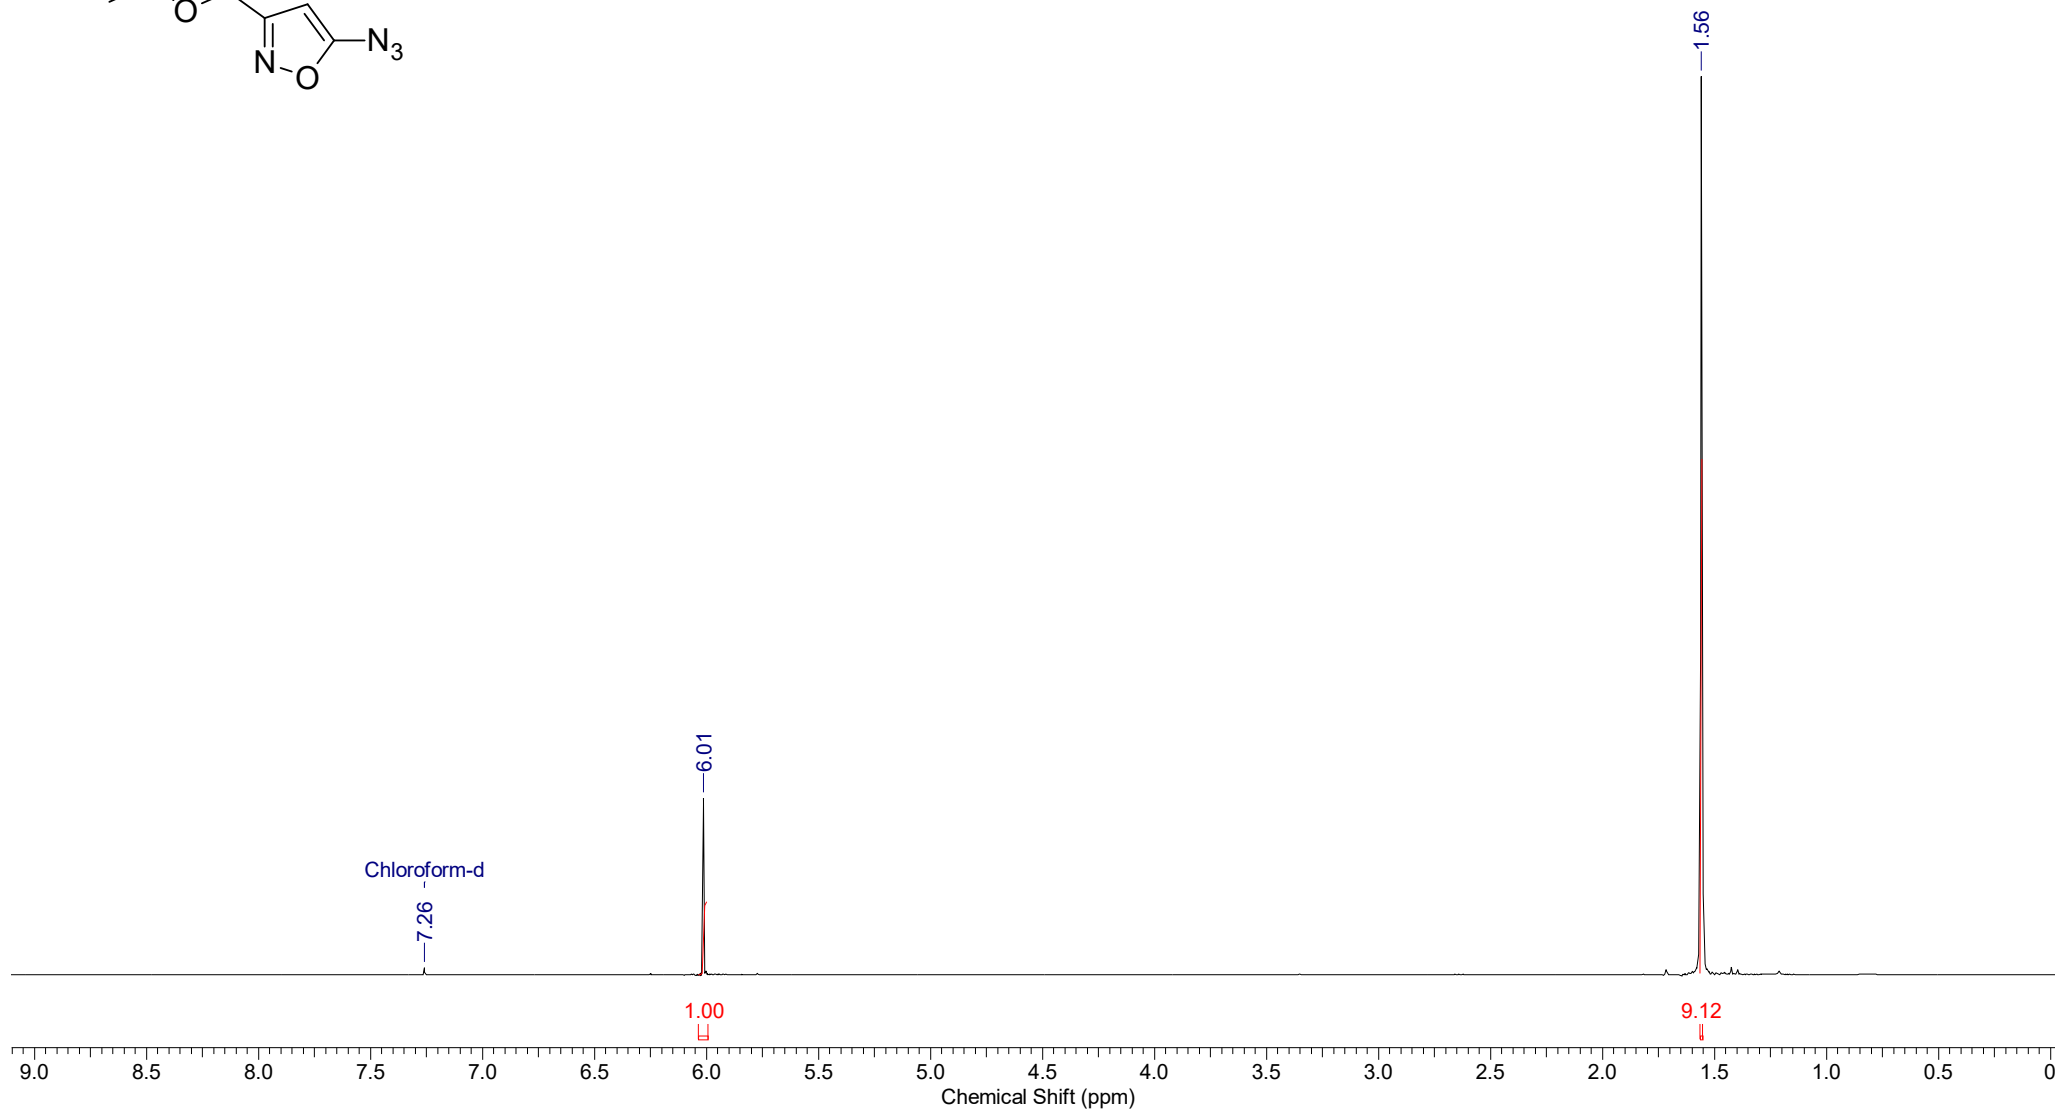

tert-Butyl 5-azidoisoxazole-3-carboxylate **2f** ( $^{13}\text{C}$  NMR)

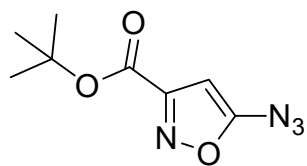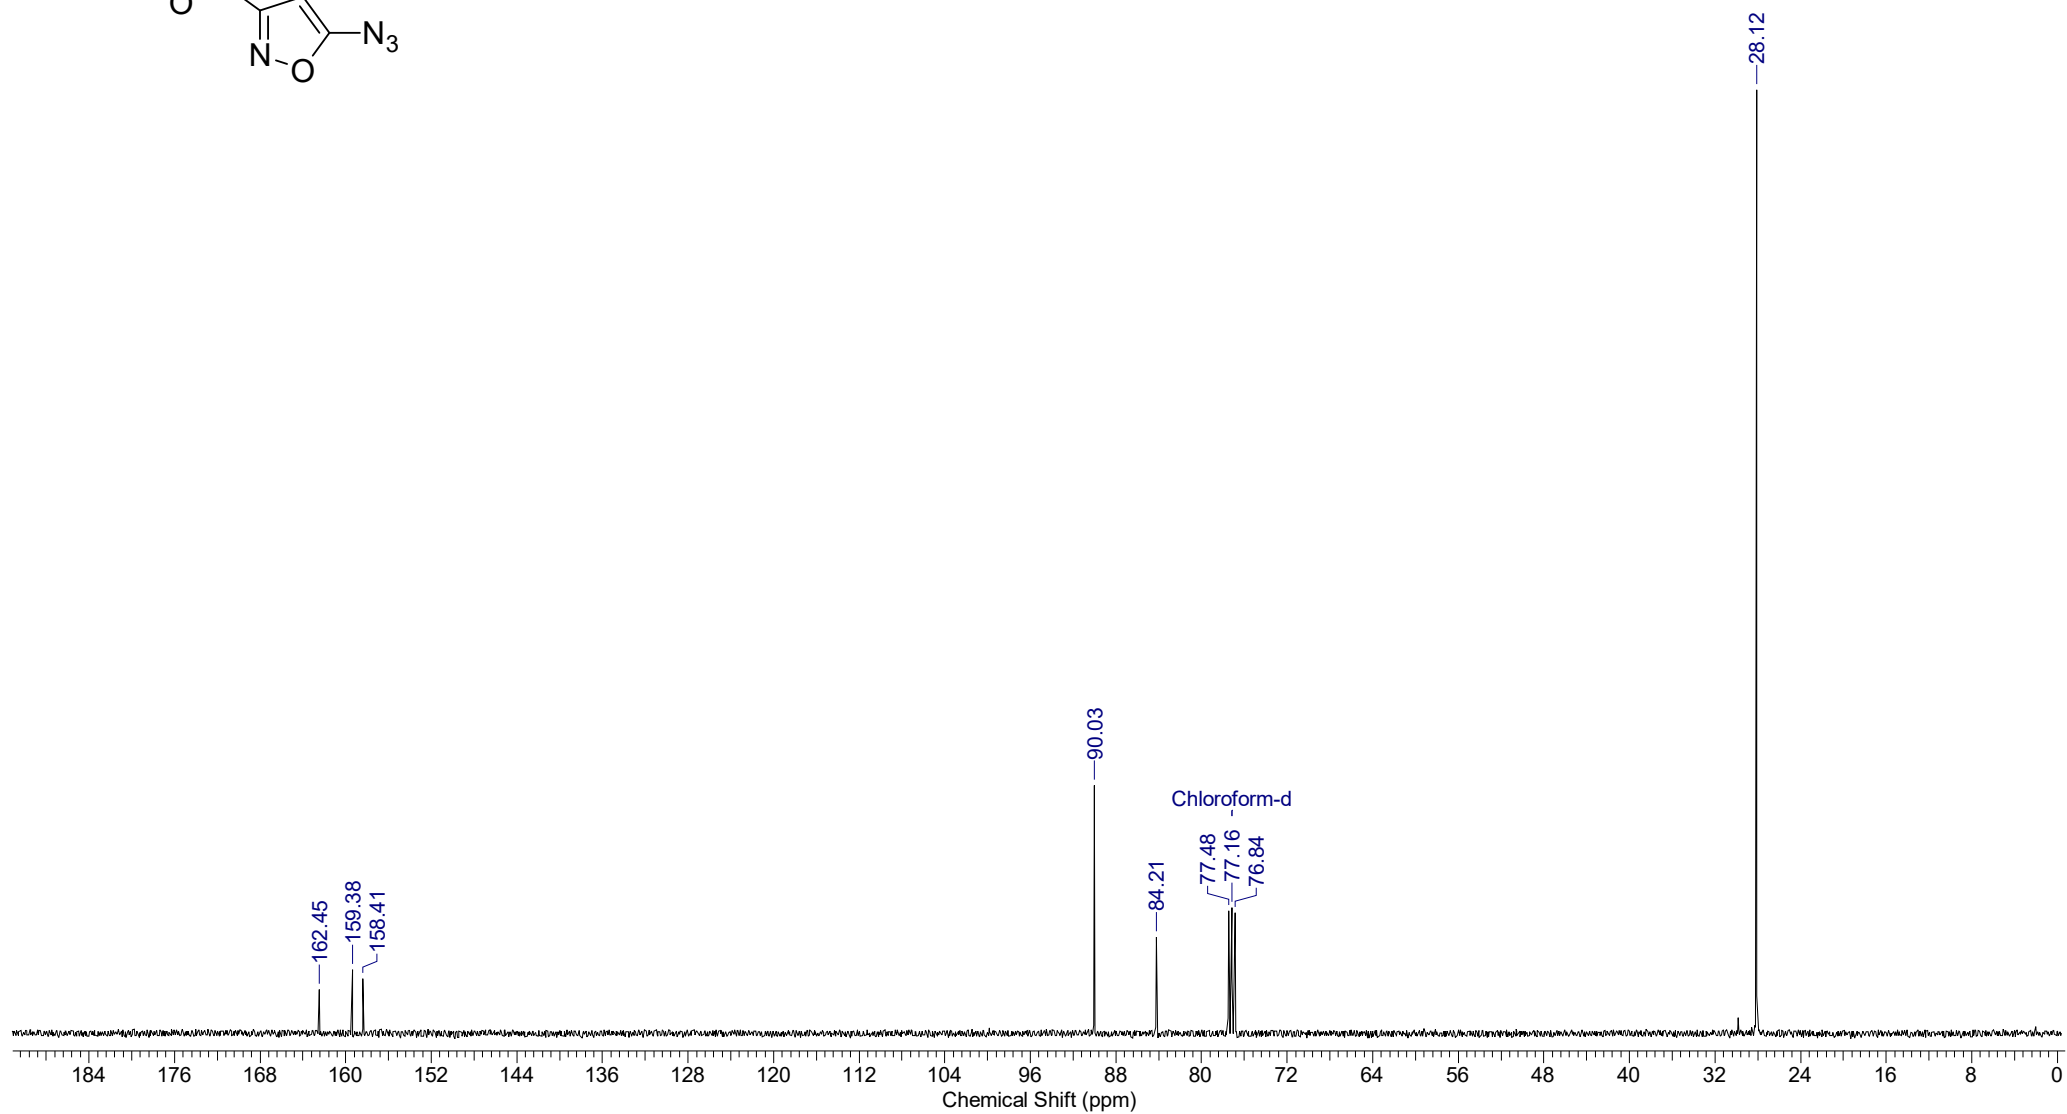

tert-Butyl 5-phenoxyisoxazole-3-carboxylate **2g** ( $^1\text{H}$  NMR)

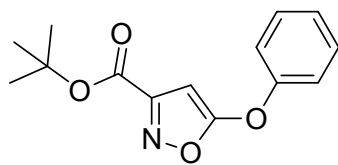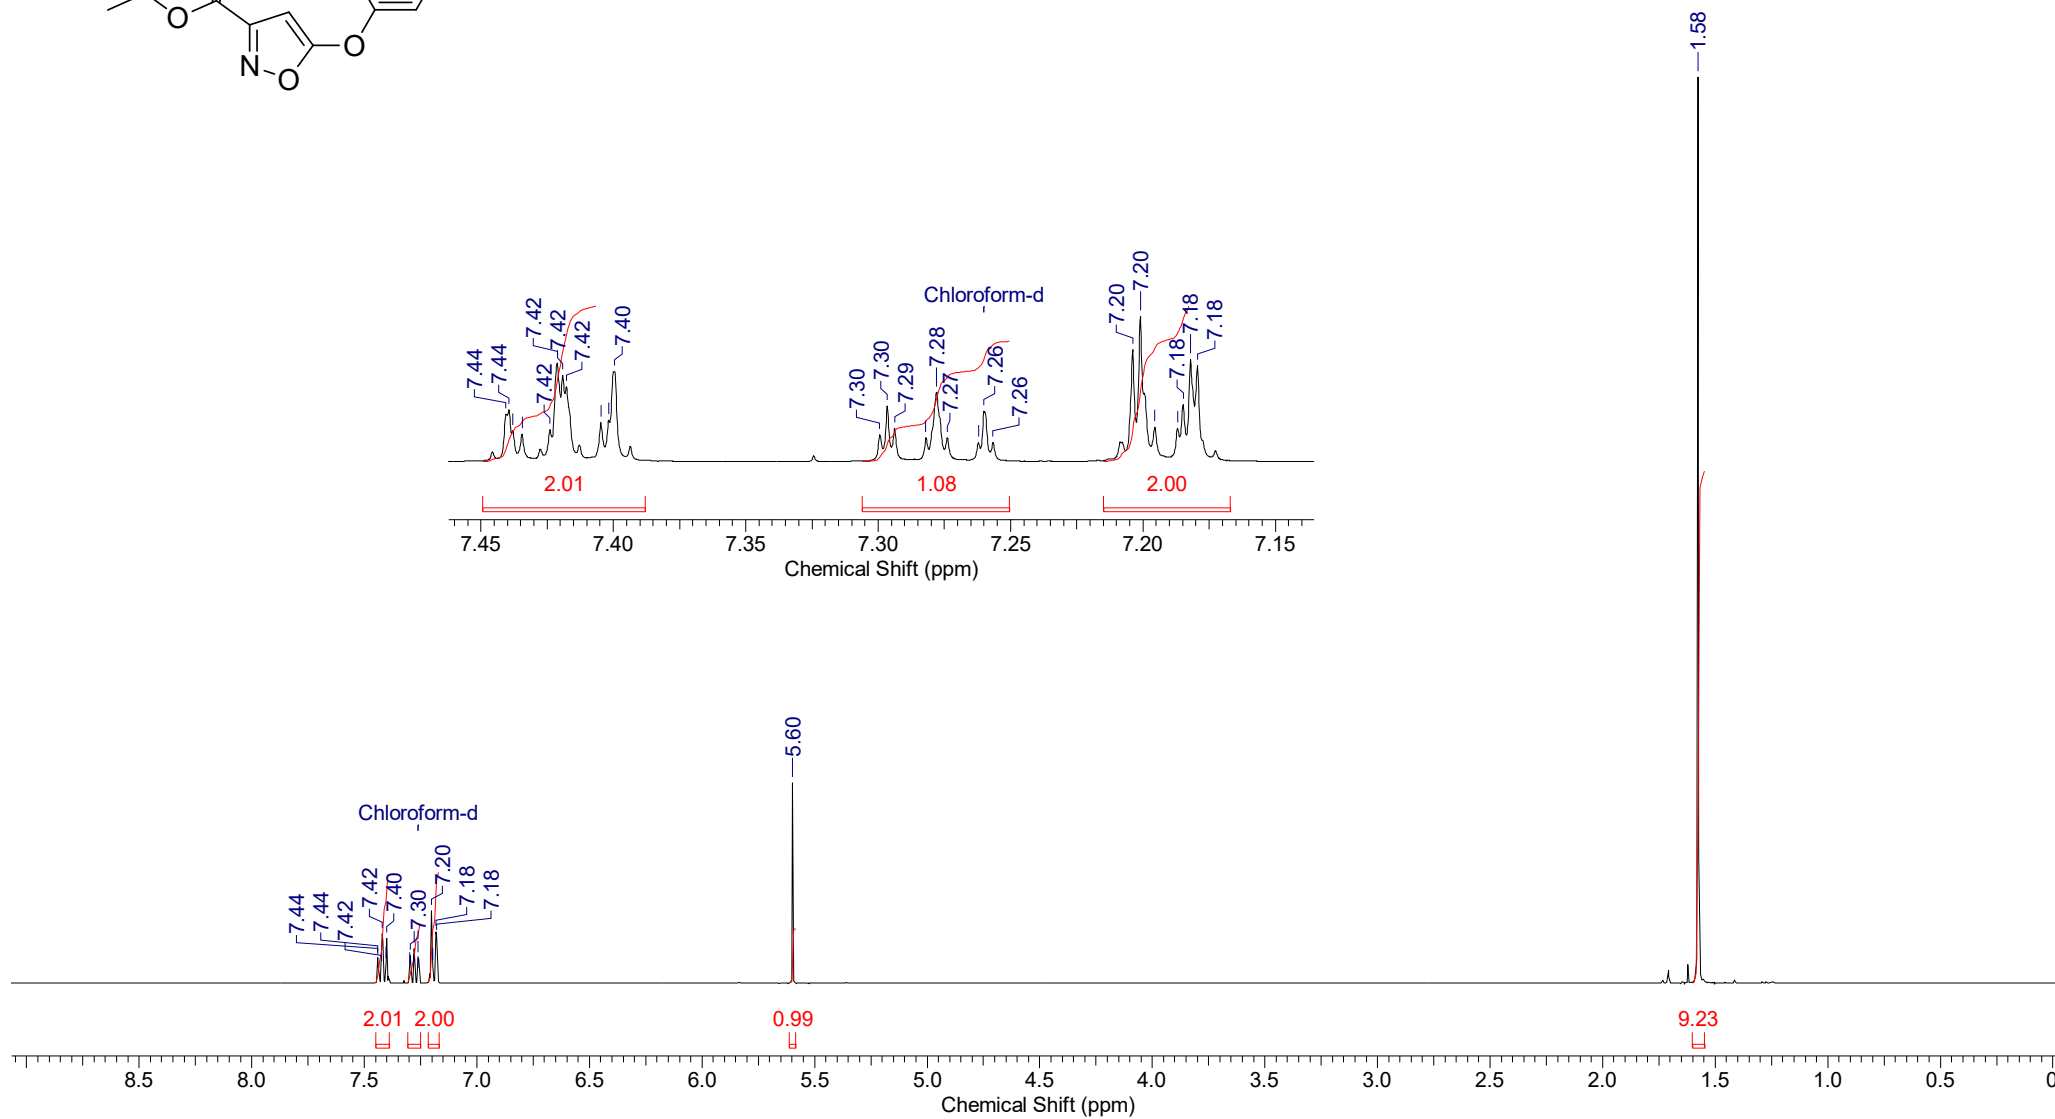

tert-Butyl 5-phenoxyisoxazole-3-carboxylate **2g** ( $^{13}\text{C}$  NMR)

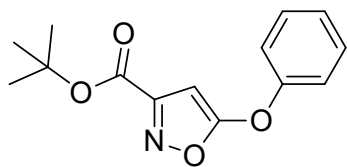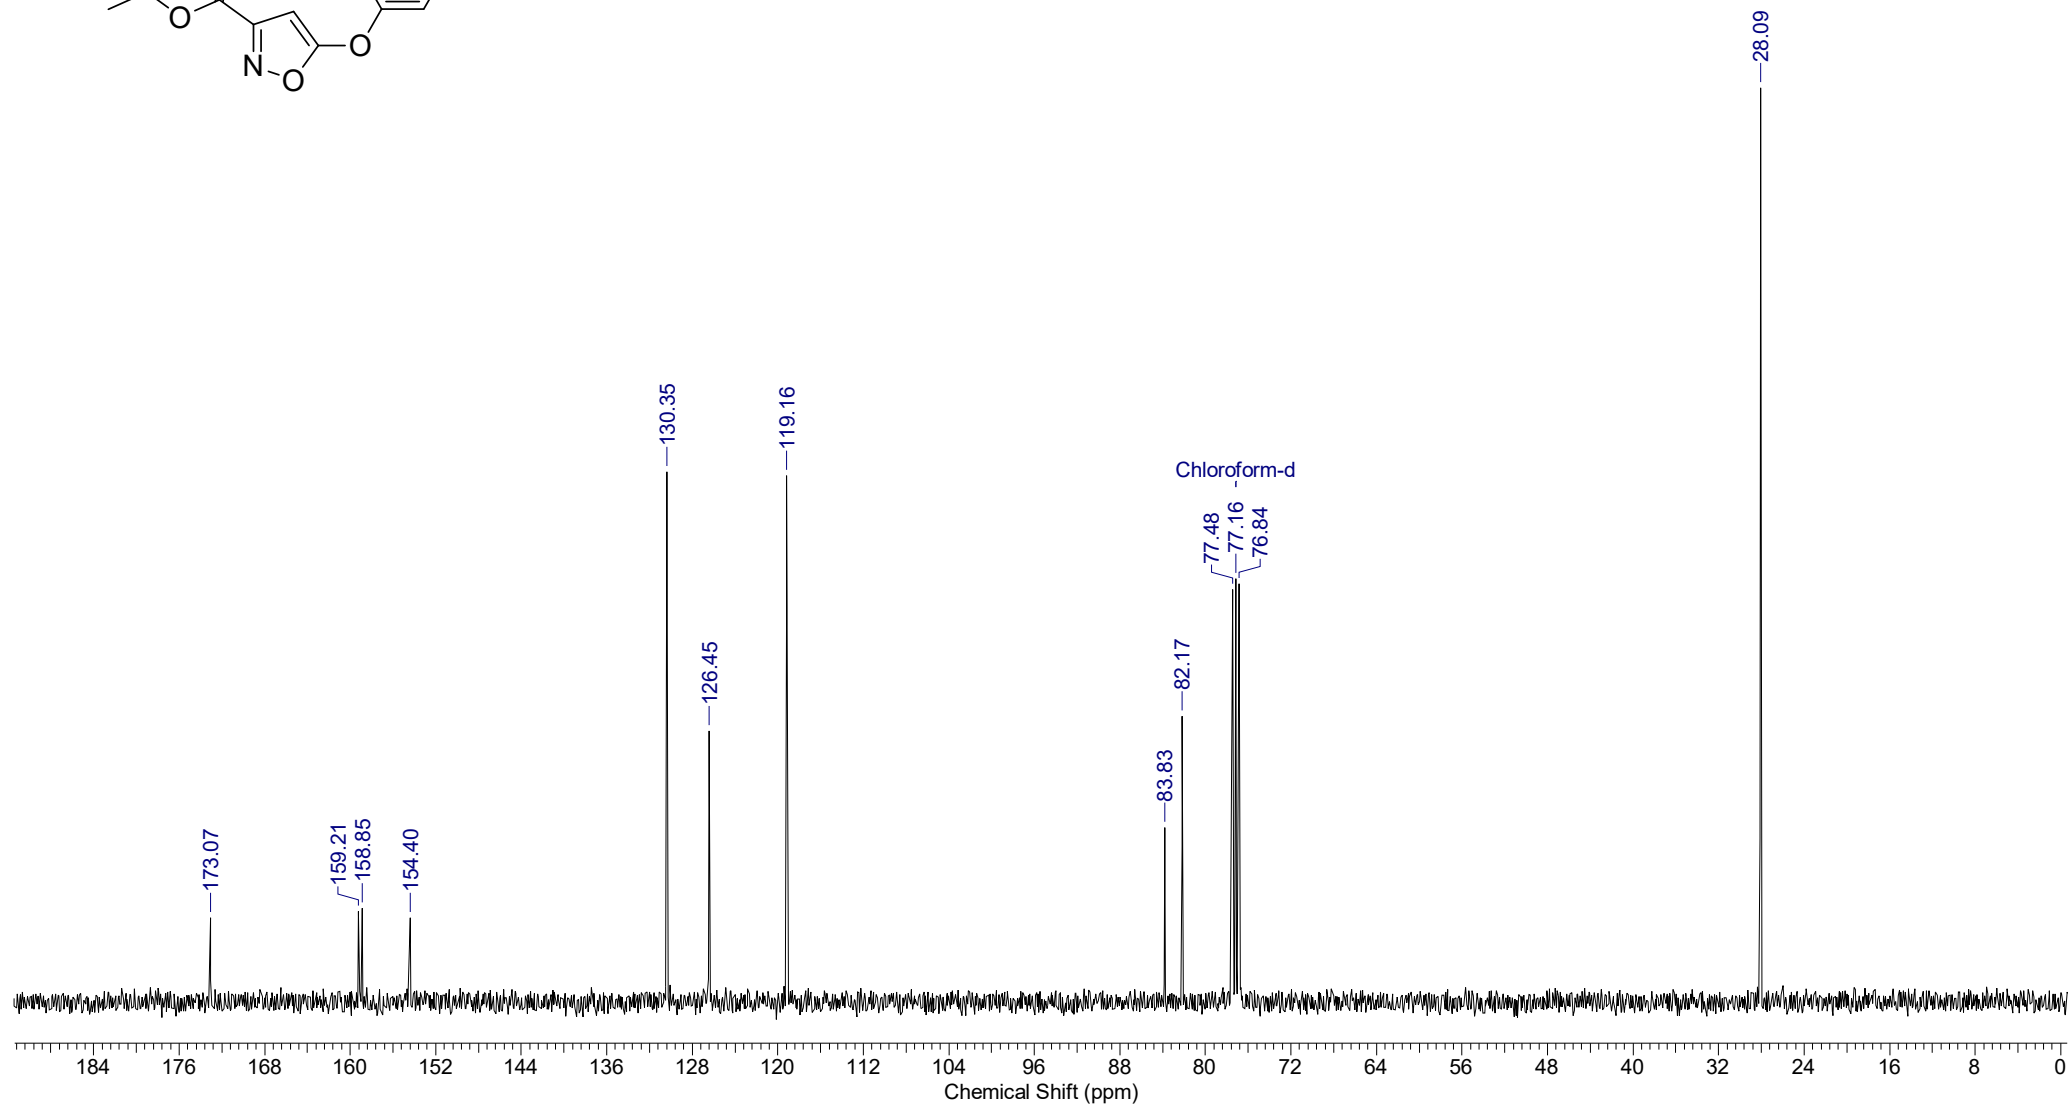



tert-Butyl 5-(3-aminophenoxy)isoxazole-3-carboxylate **2h** ( $^1\text{H}$  NMR)

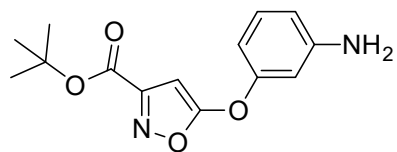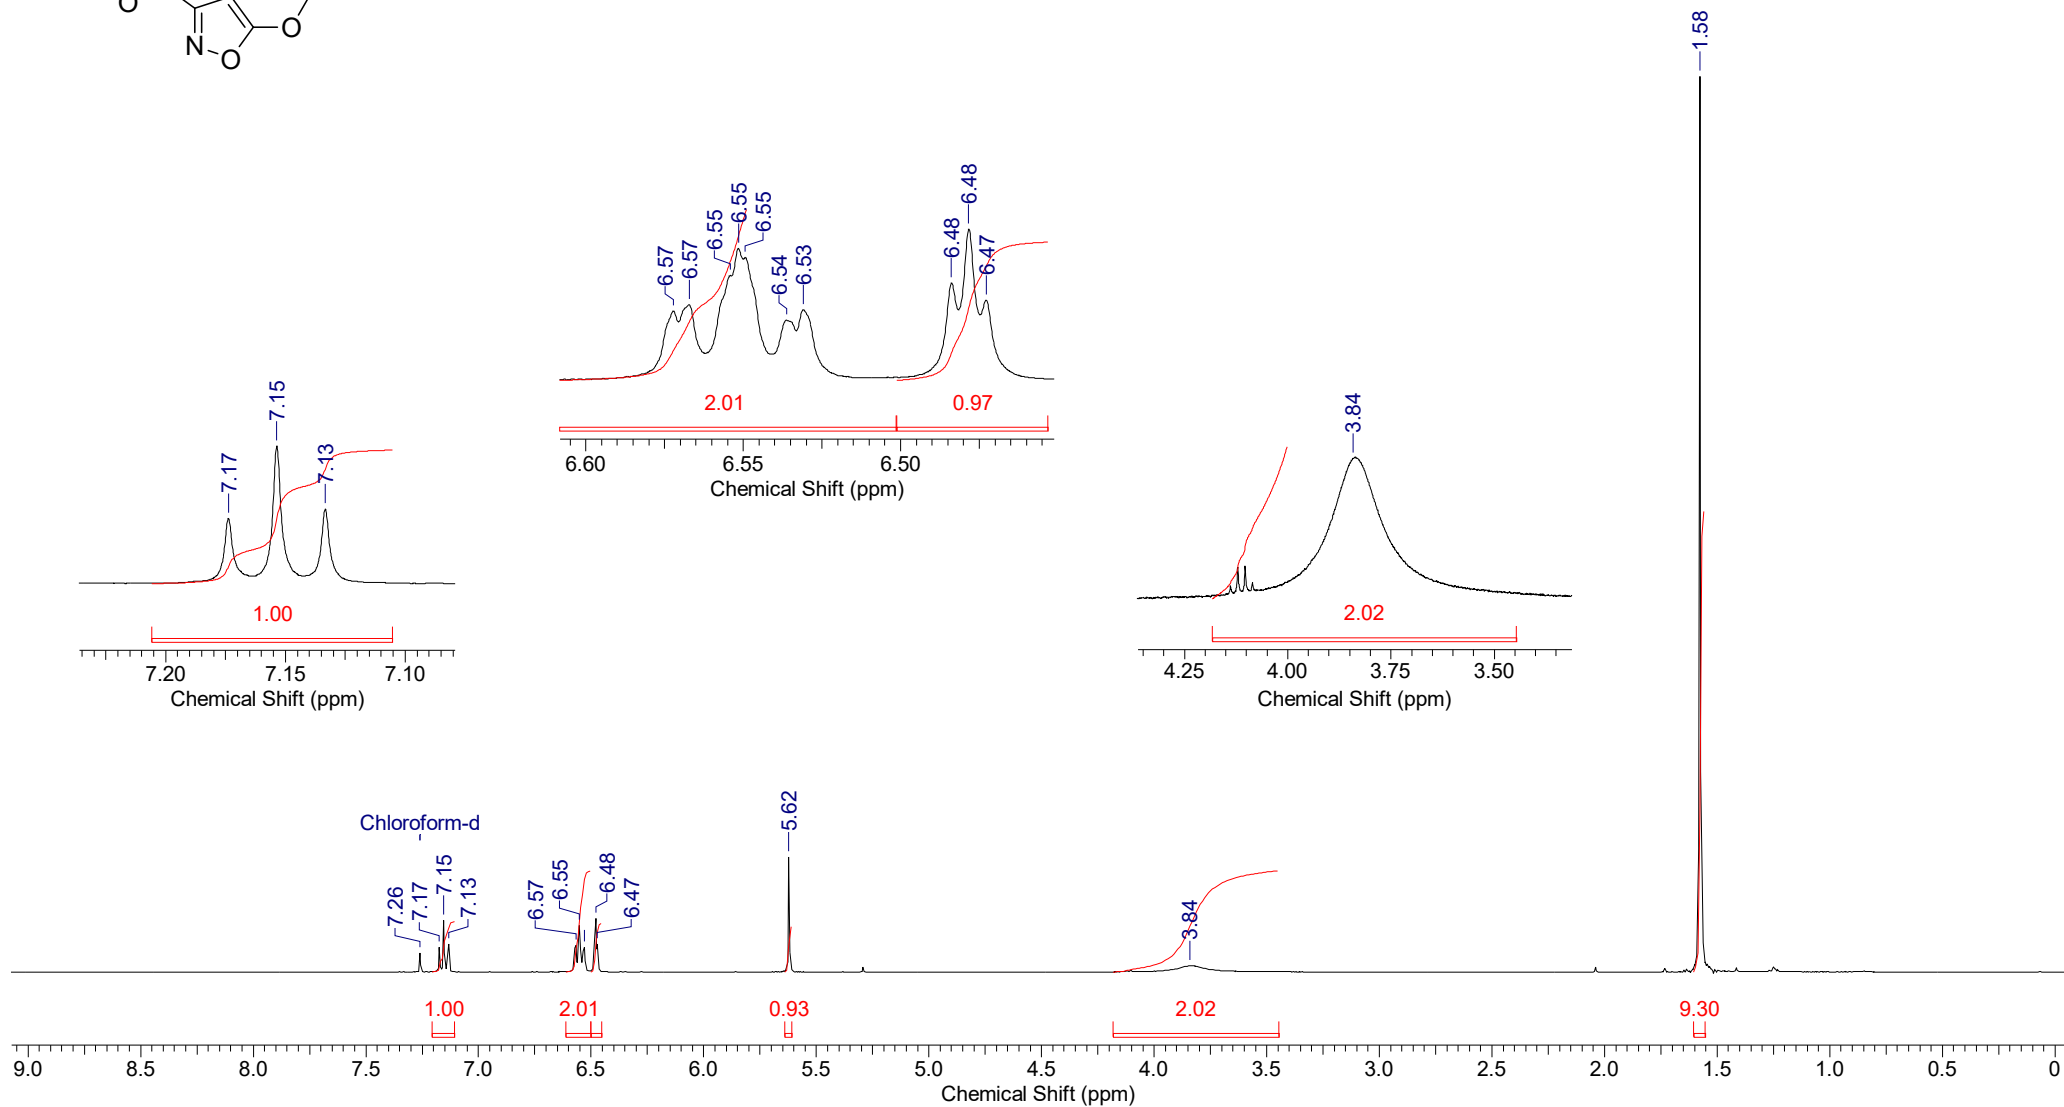

tert-Butyl 5-(3-aminophenoxy)isoxazole-3-carboxylate **2h** ( $^{13}\text{C}$  NMR)

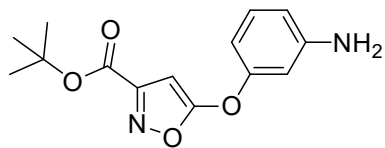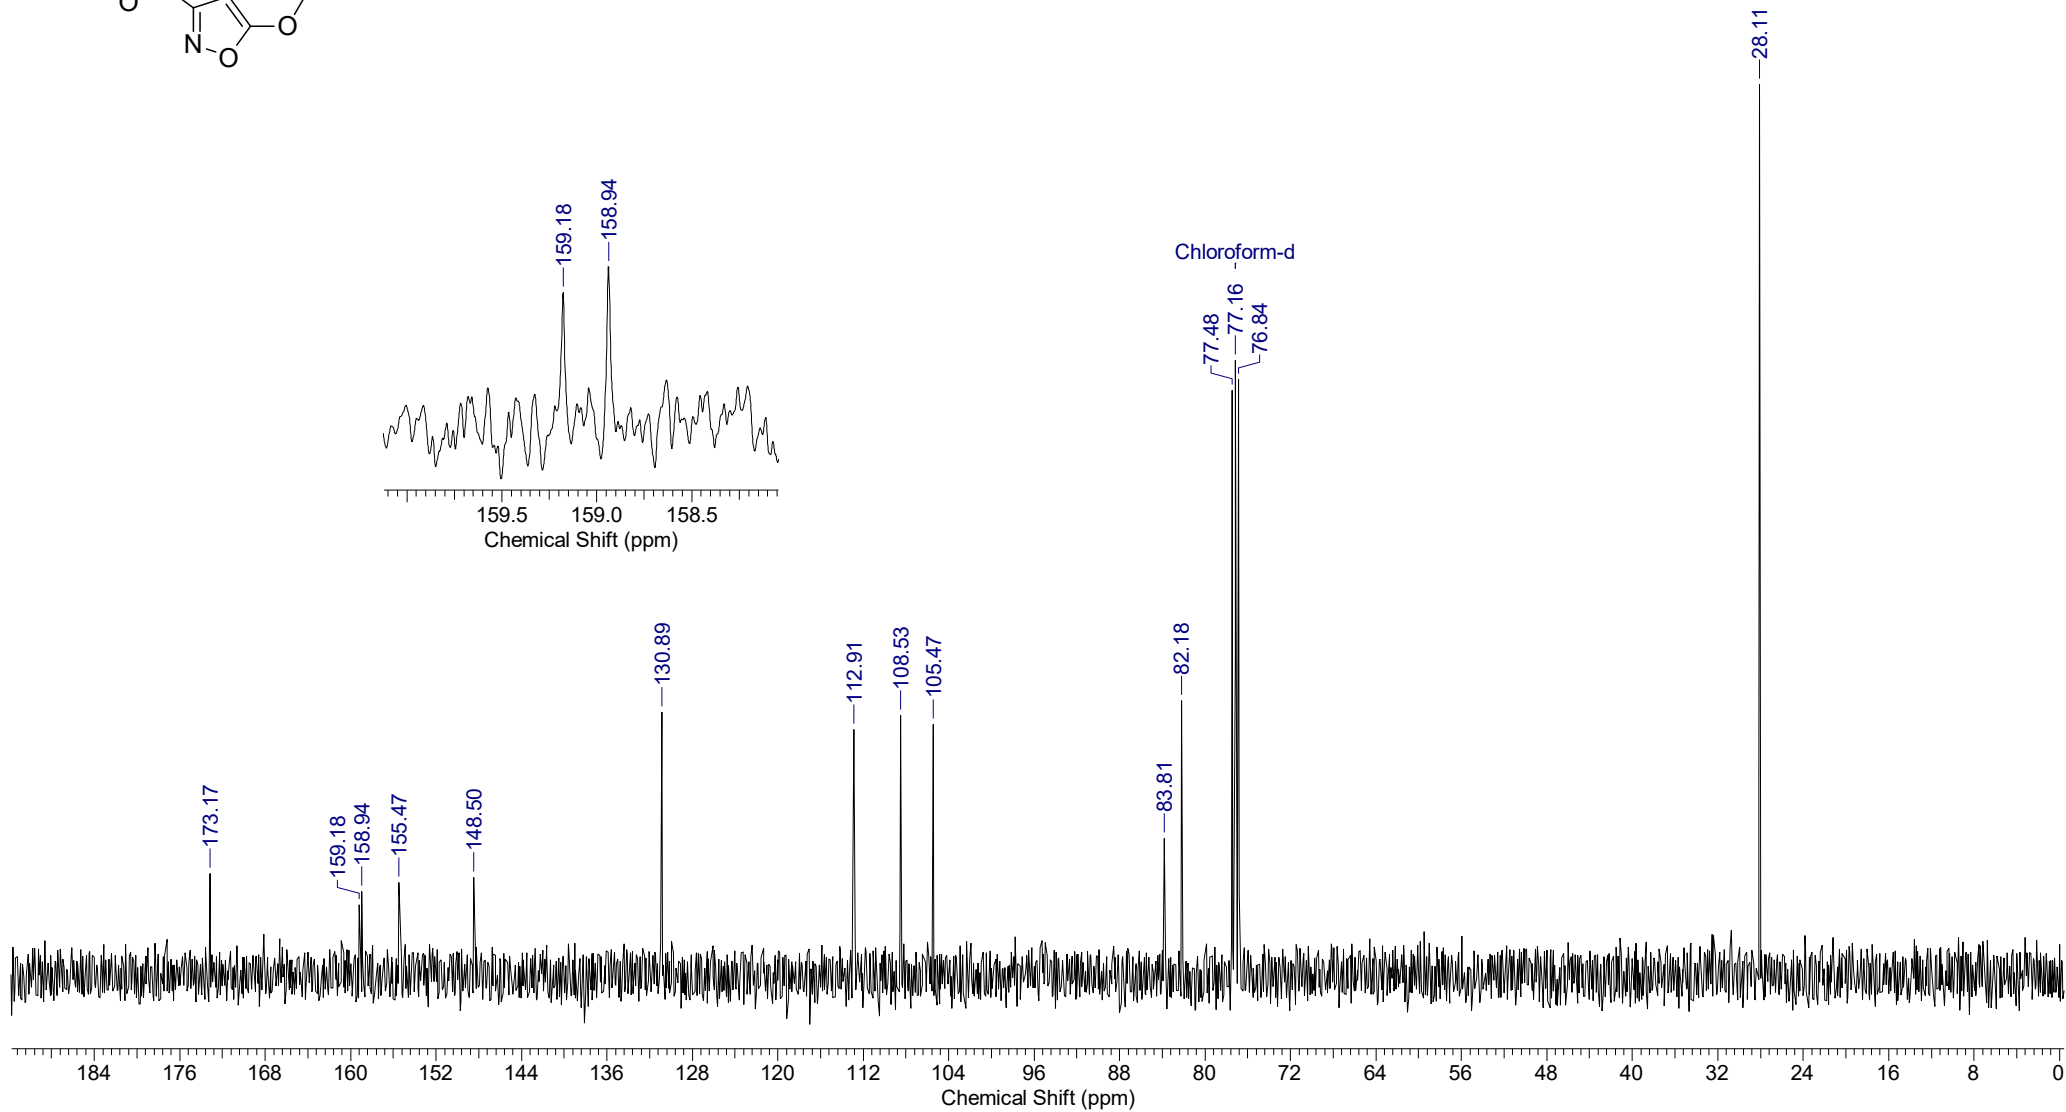

tert-Butyl 5-methoxyisoxazole-3-carboxylate **2i** (<sup>1</sup>H NMR)

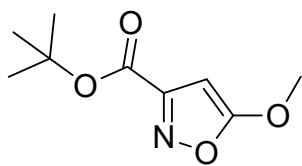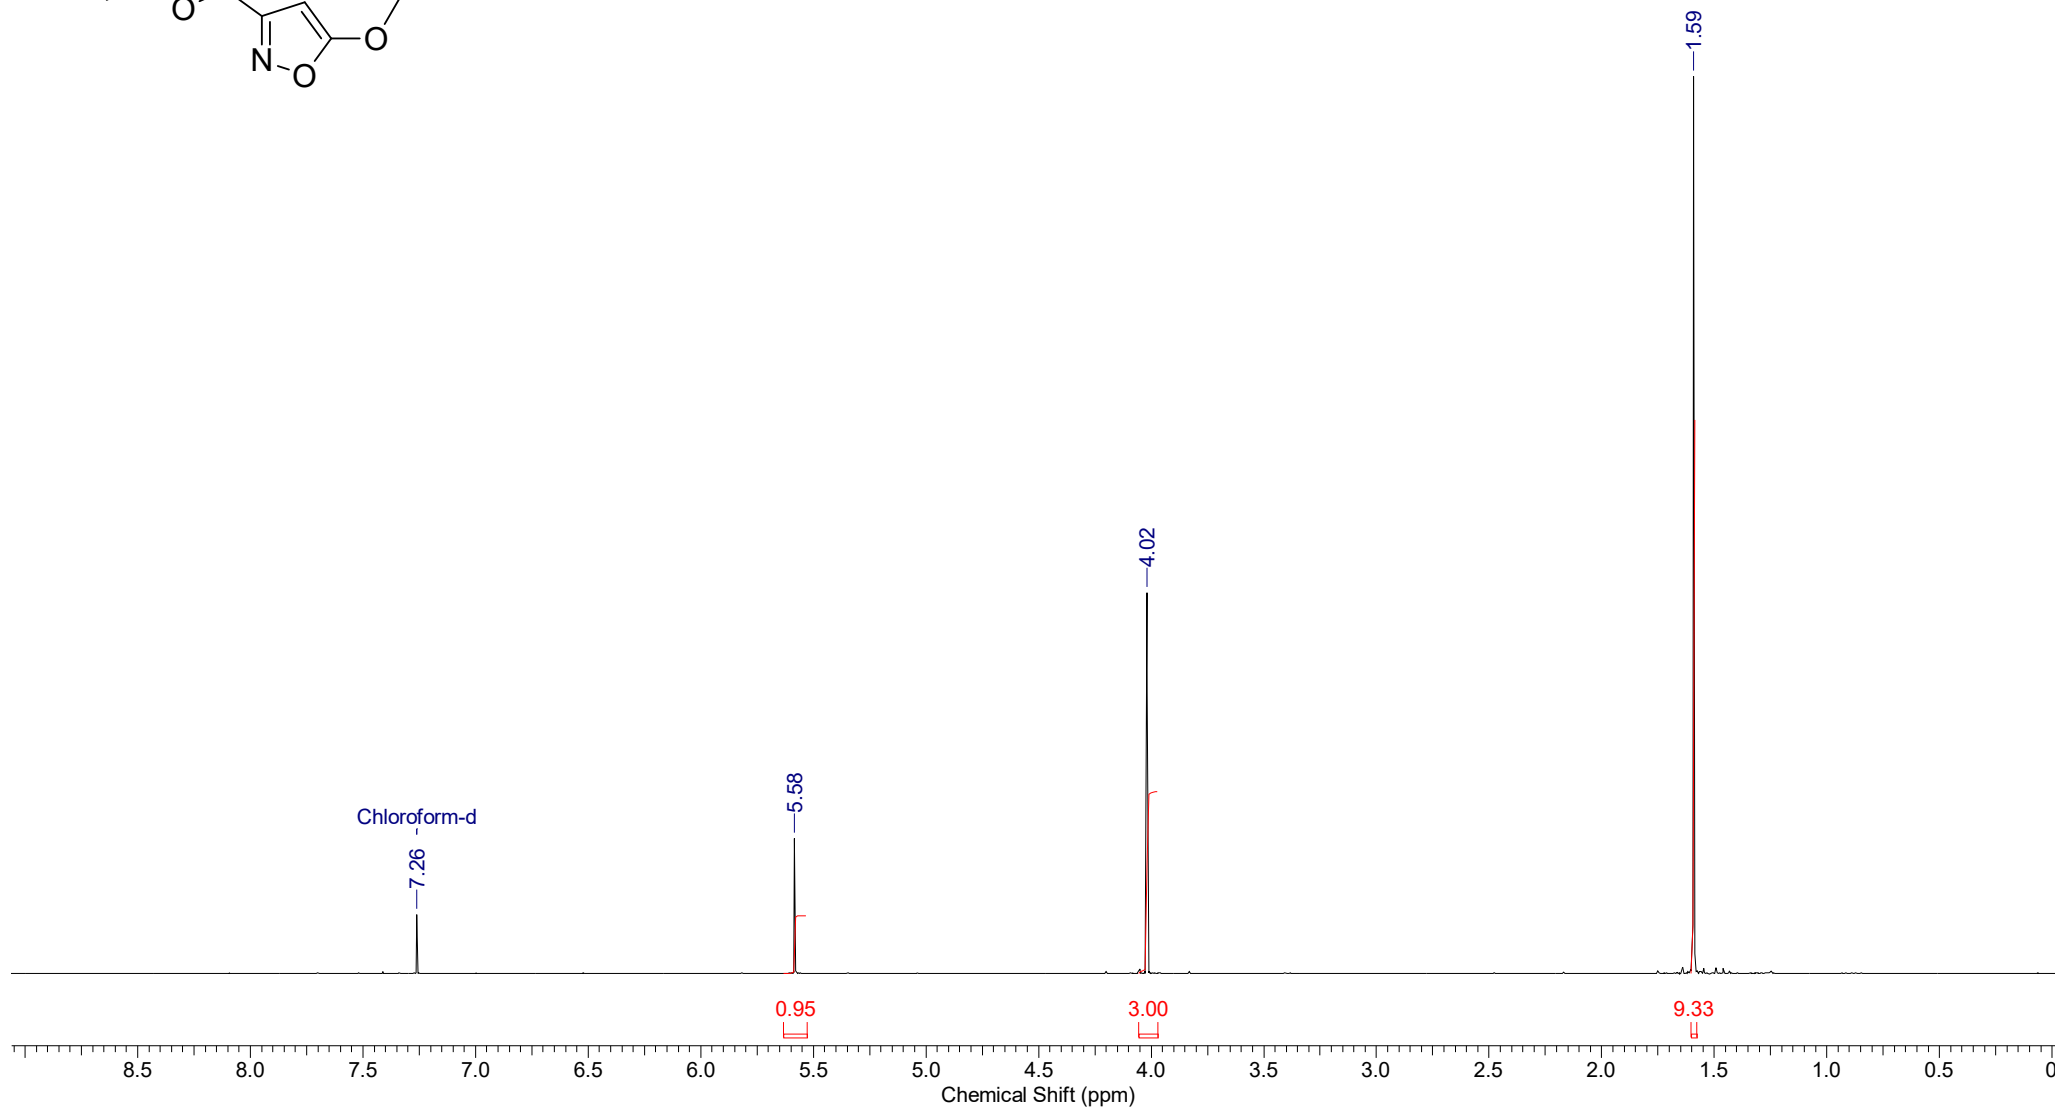

tert-Butyl 5-methoxyisoxazole-3-carboxylate **2i** ( $^{13}\text{C}$  NMR)

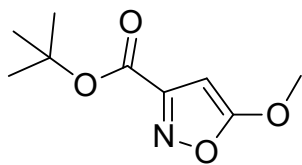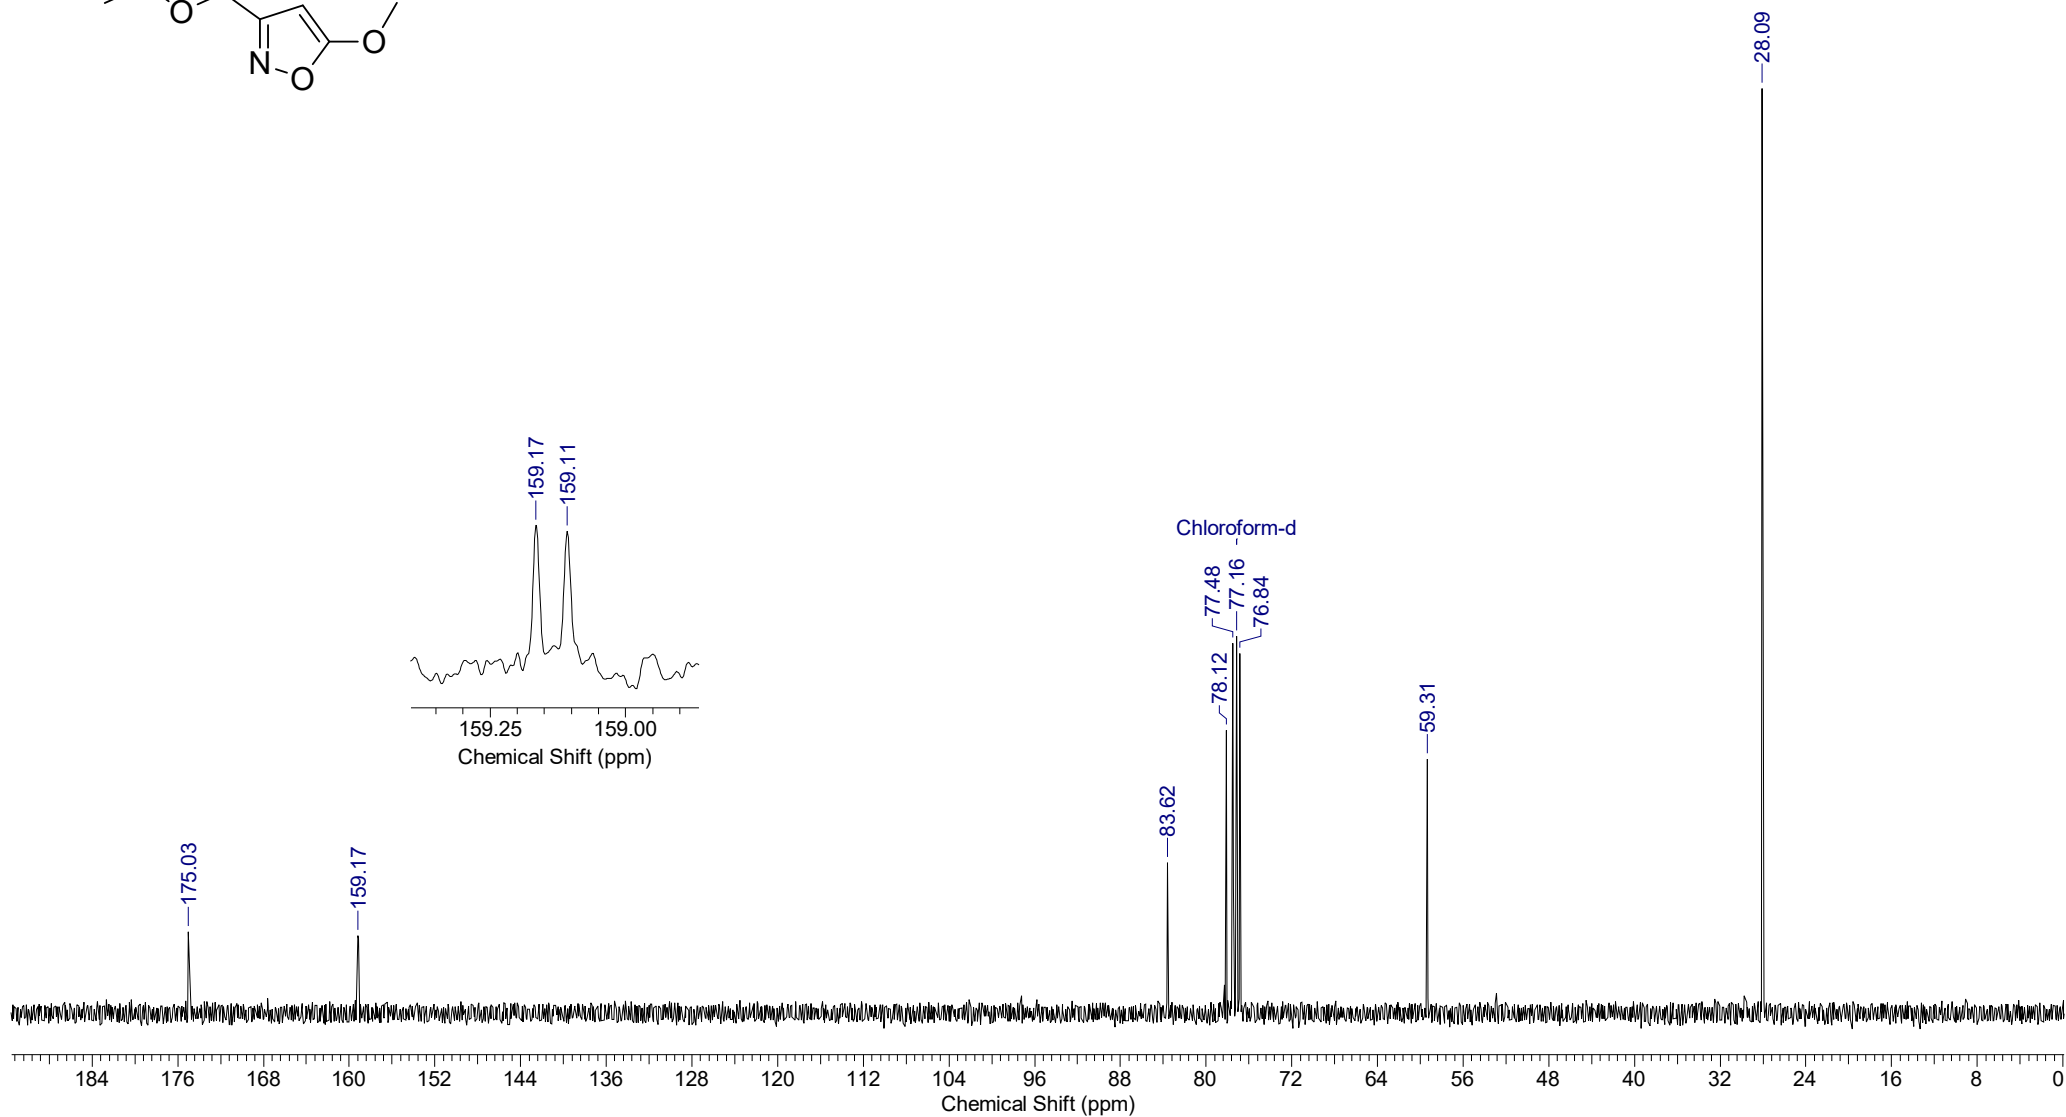

tert-Butyl 5-ethoxyisoxazole-3-carboxylate **2j** ( $^1\text{H}$  NMR)

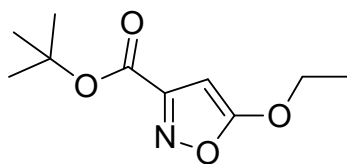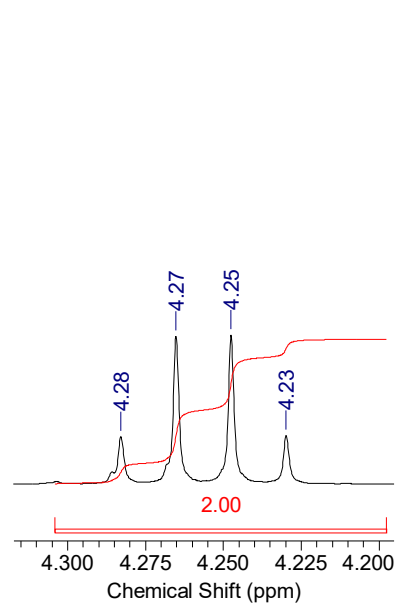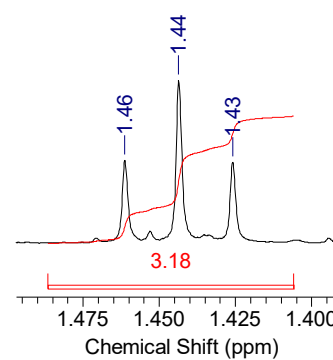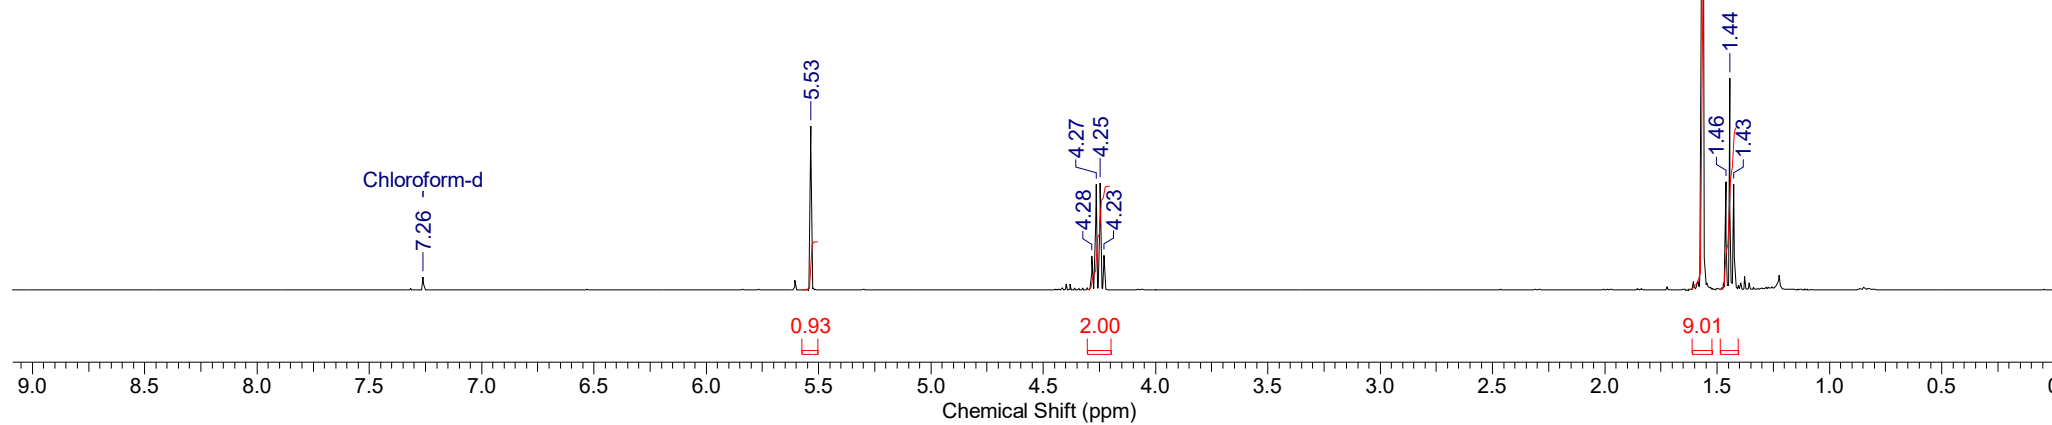

tert-Butyl 5-ethoxyisoxazole-3-carboxylate **2j** (<sup>1</sup>H NMR)

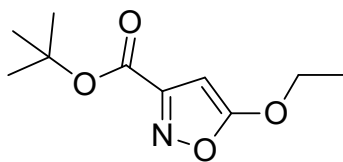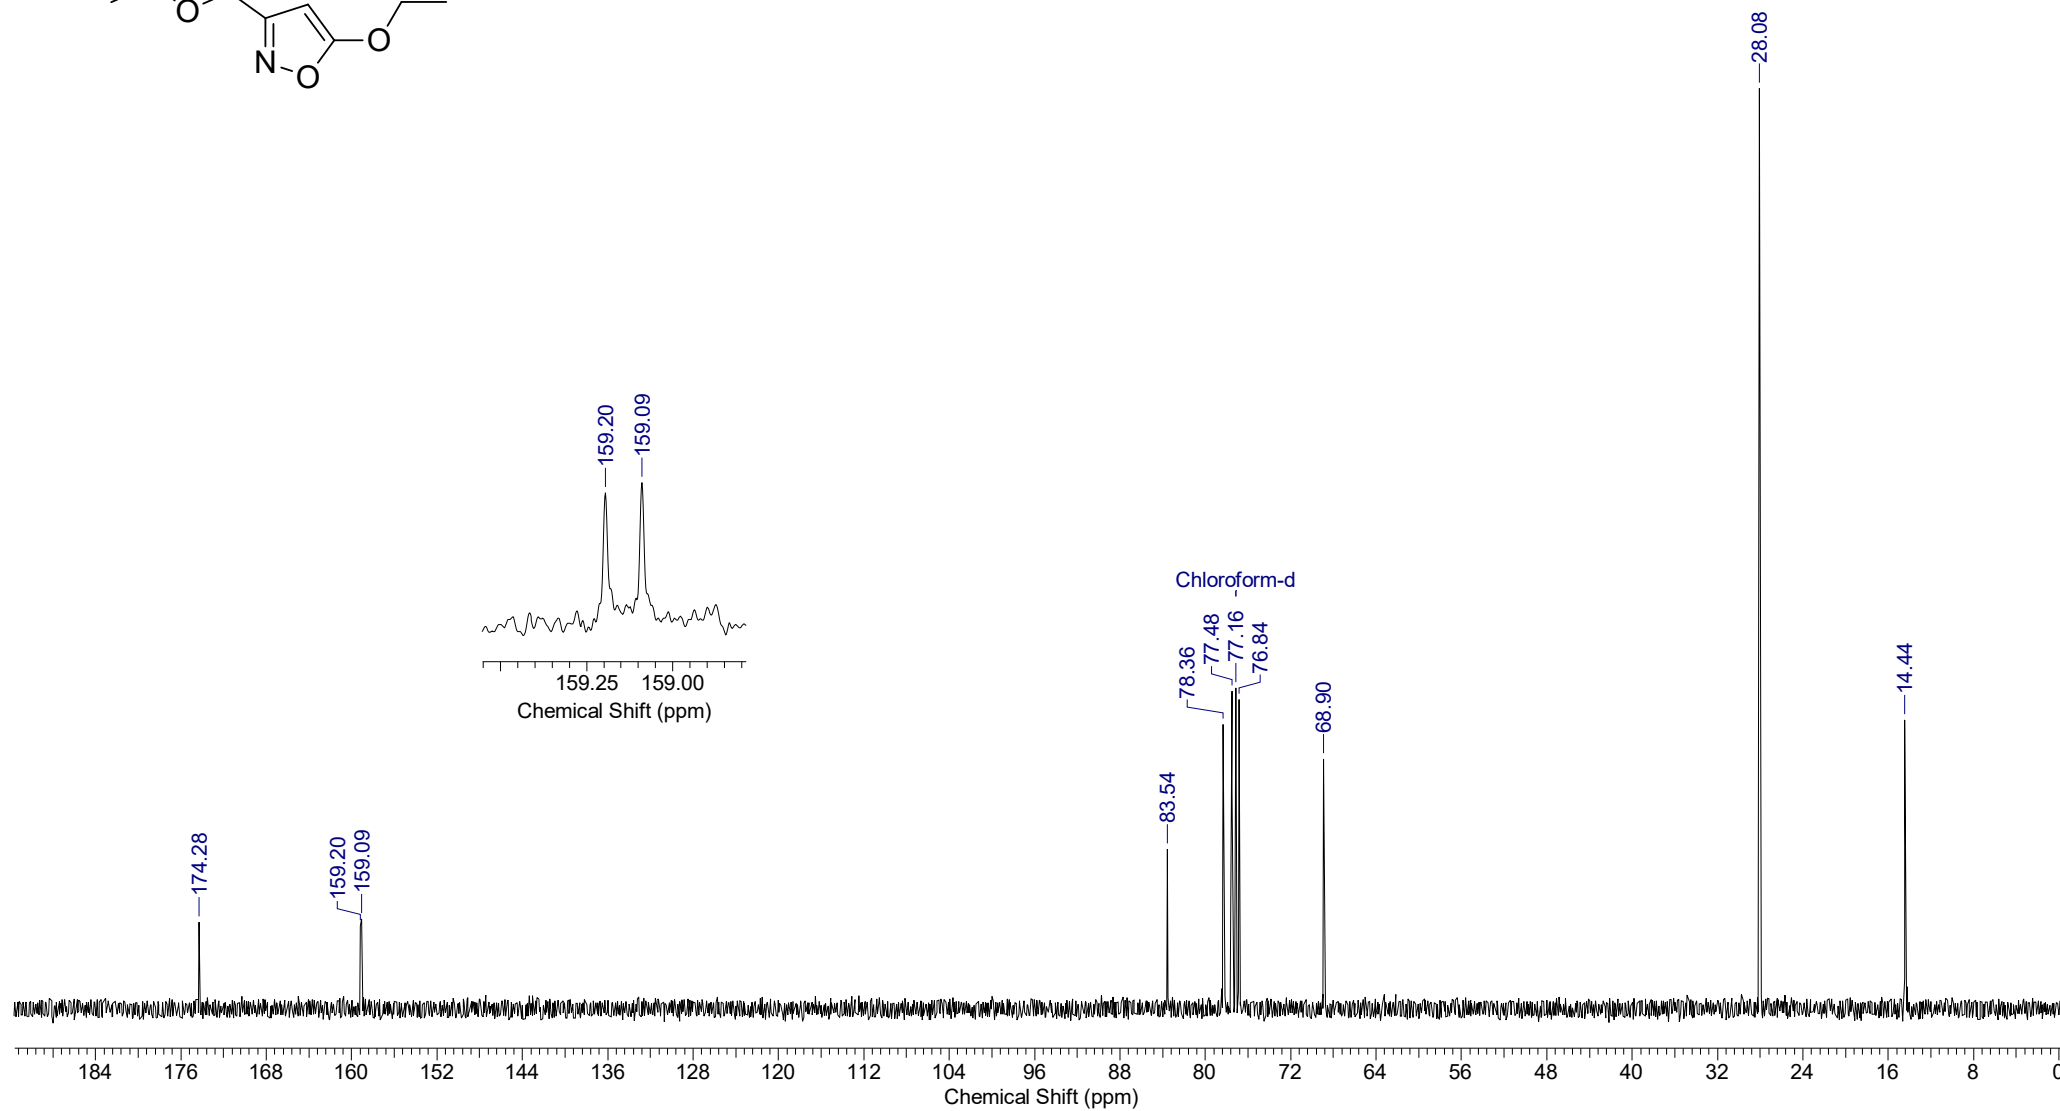

# Di-tert-butyl 5,5'-[1,2-phenylenebis(oxy)]diisoxazole-3-carboxylate **2k** ( $^1\text{H}$ NMR)

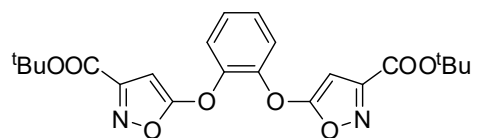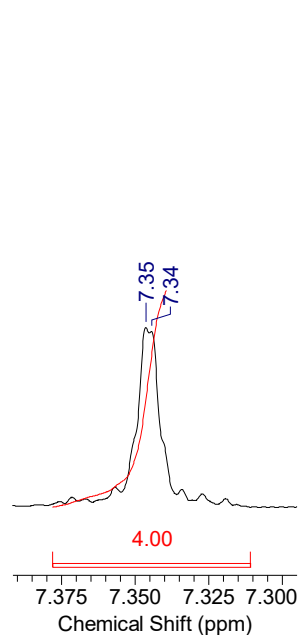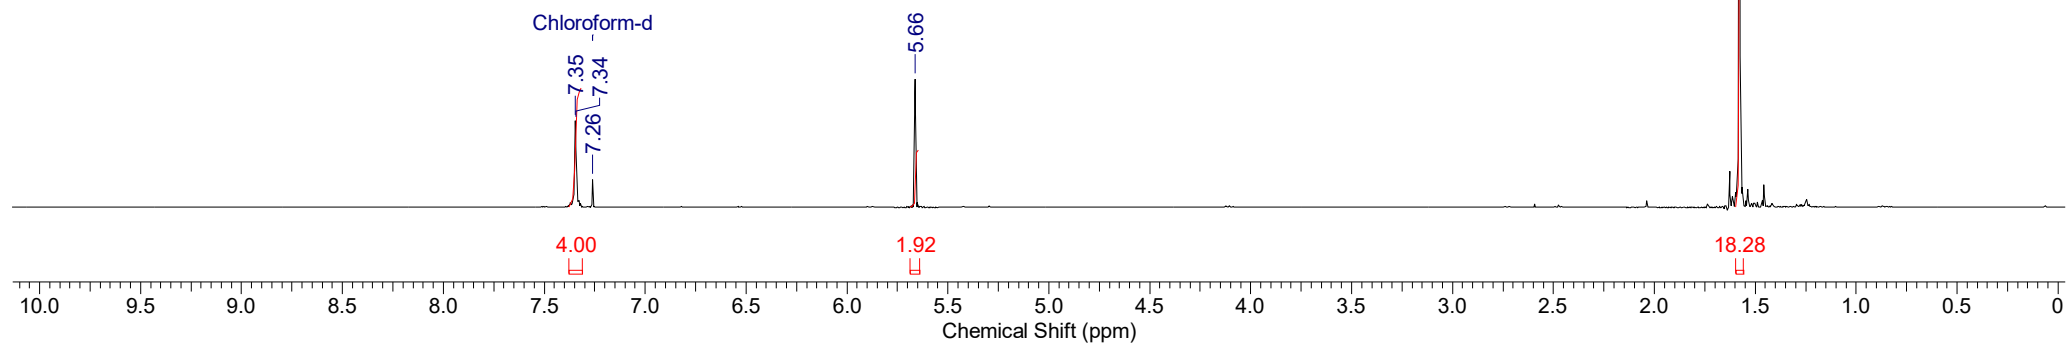

# Di-tert-butyl 5,5'-[1,2-phenylenebis(oxy)]diisoxazole-3-carboxylate **2k** ( $^{13}\text{C}$ NMR)

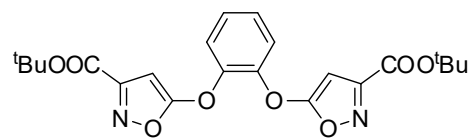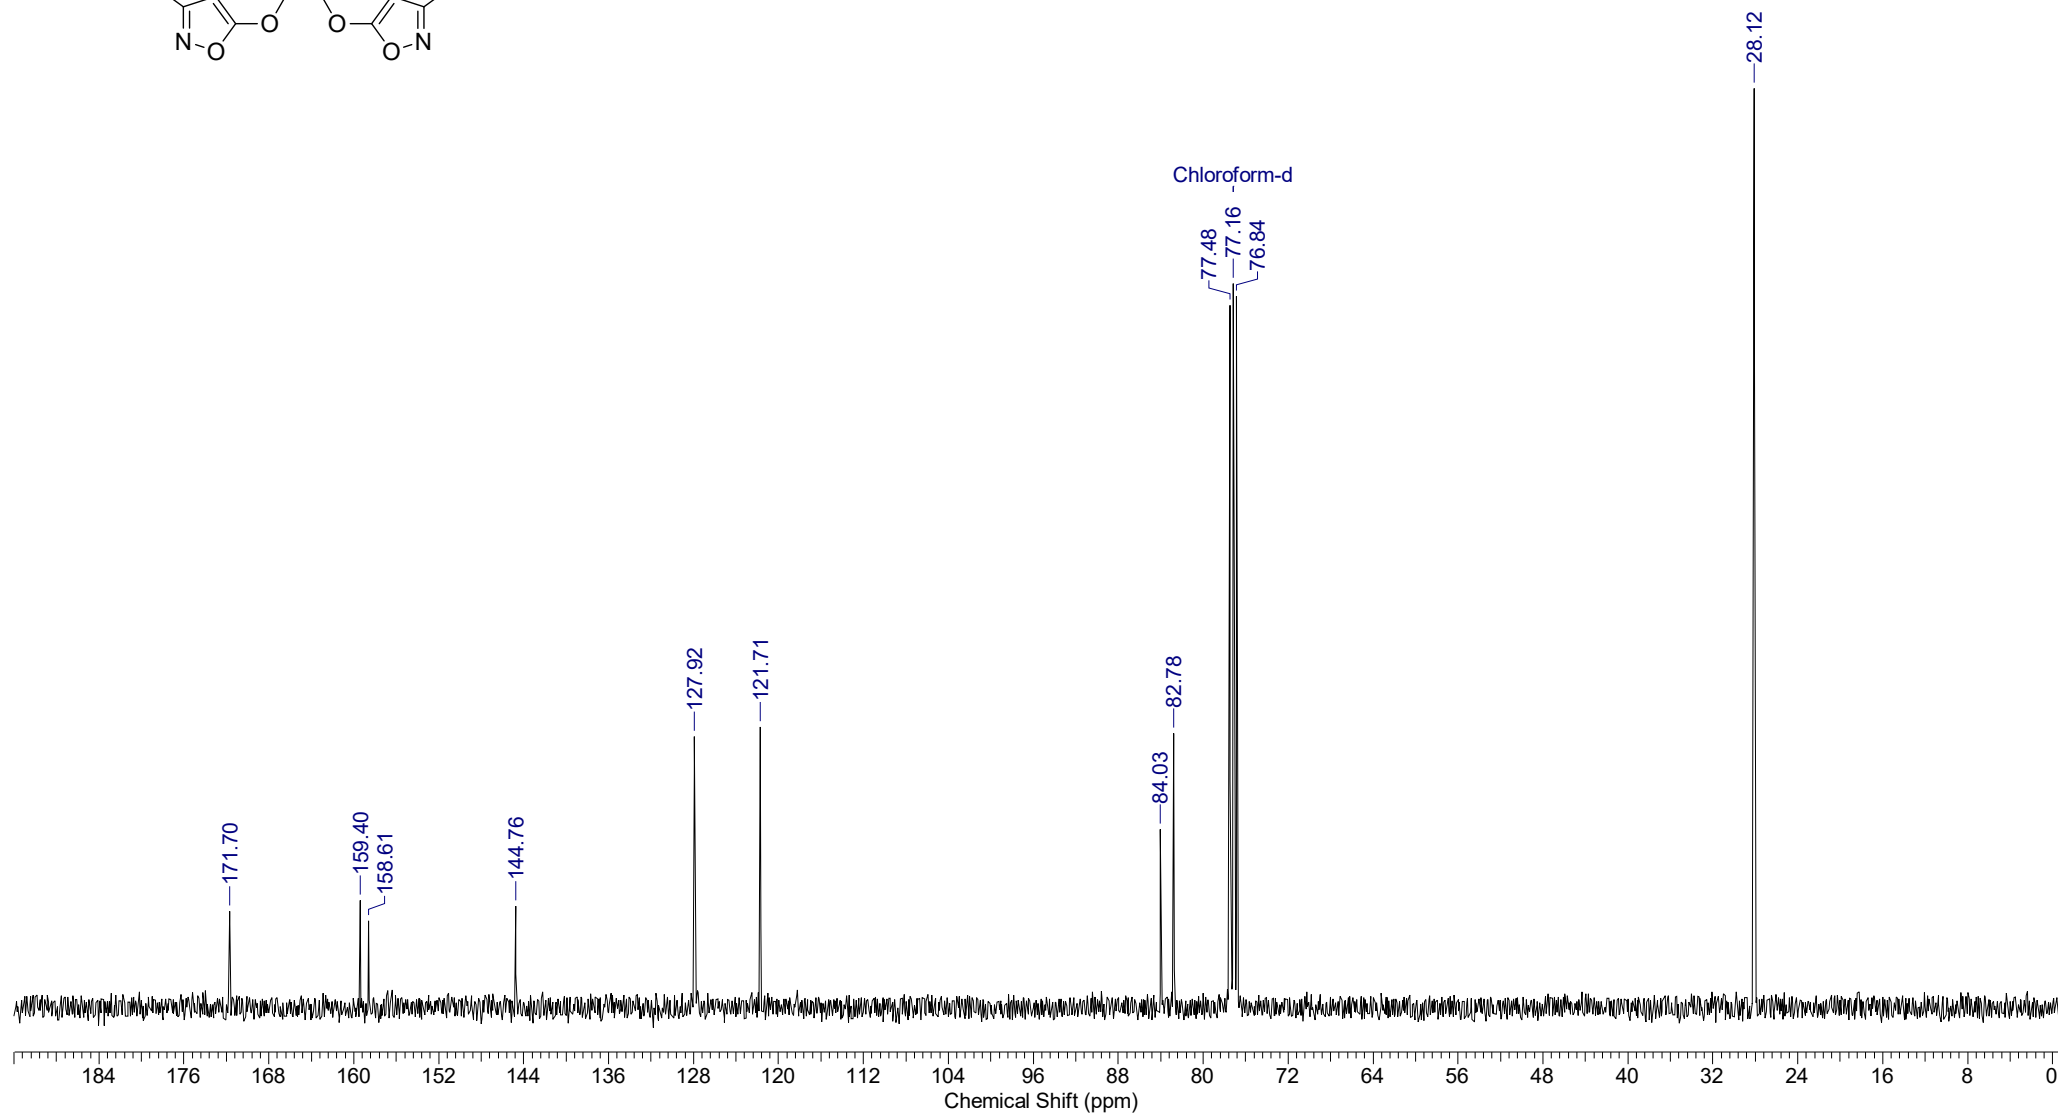



# Di-tert-butyl 5,5'-[1,2-phenylenebis(oxy)]diisoxazole-3-carboxylate **2k** (APT)

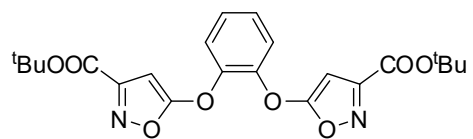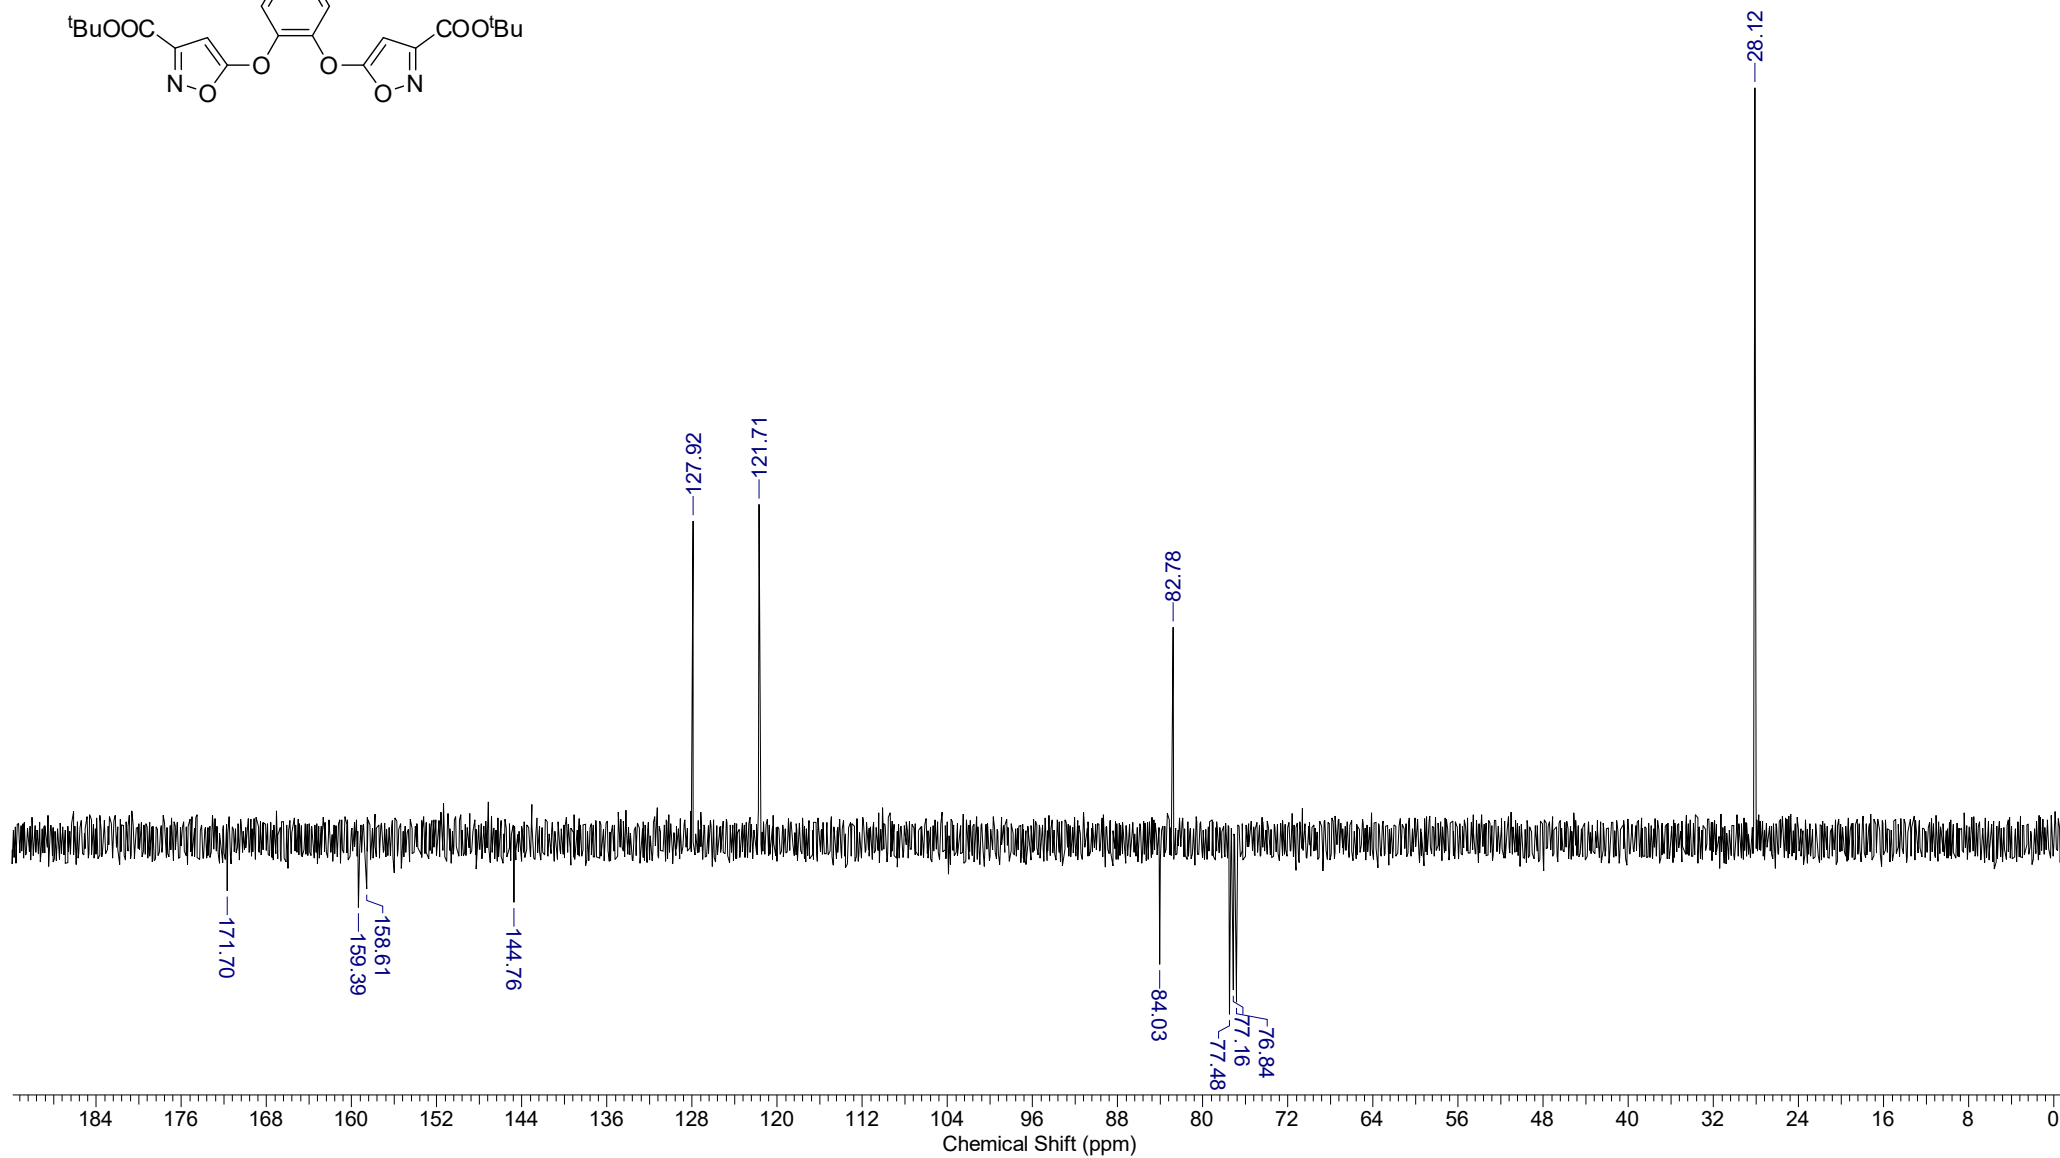

# Di-tert-butyl 5,5'-[1,3-phenylenebis(oxy)]diisoxazole-3-carboxylate **2I** ( $^1\text{H}$ NMR)

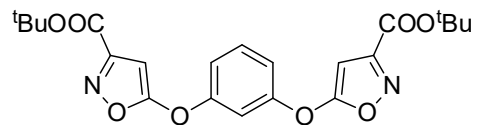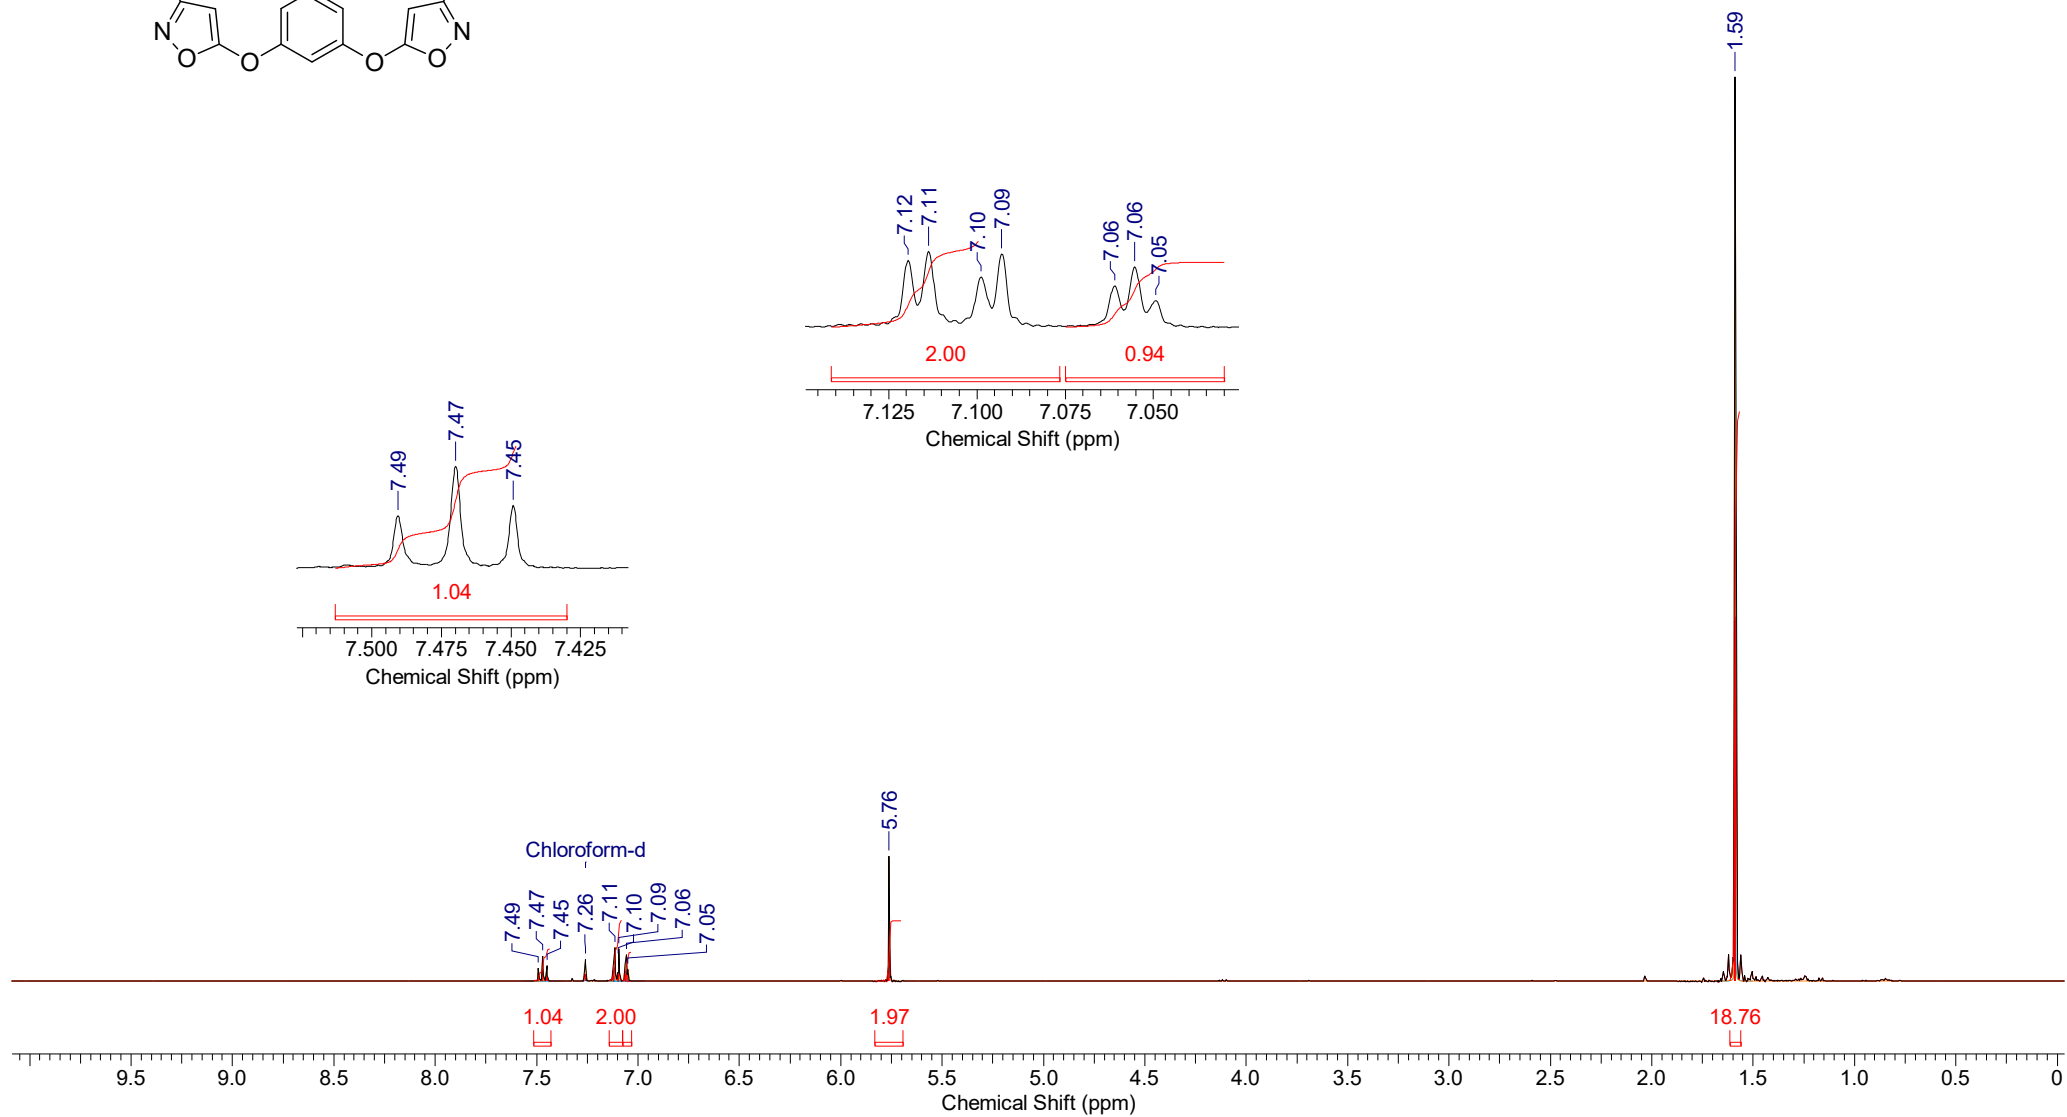

# Di-tert-butyl 5,5'-[1,3-phenylenebis(oxy)]diisoxazole-3-carboxylate **2I** ( $^{13}\text{C}$ NMR)

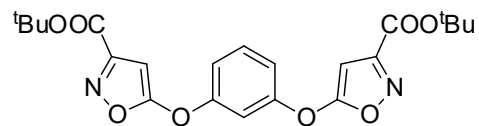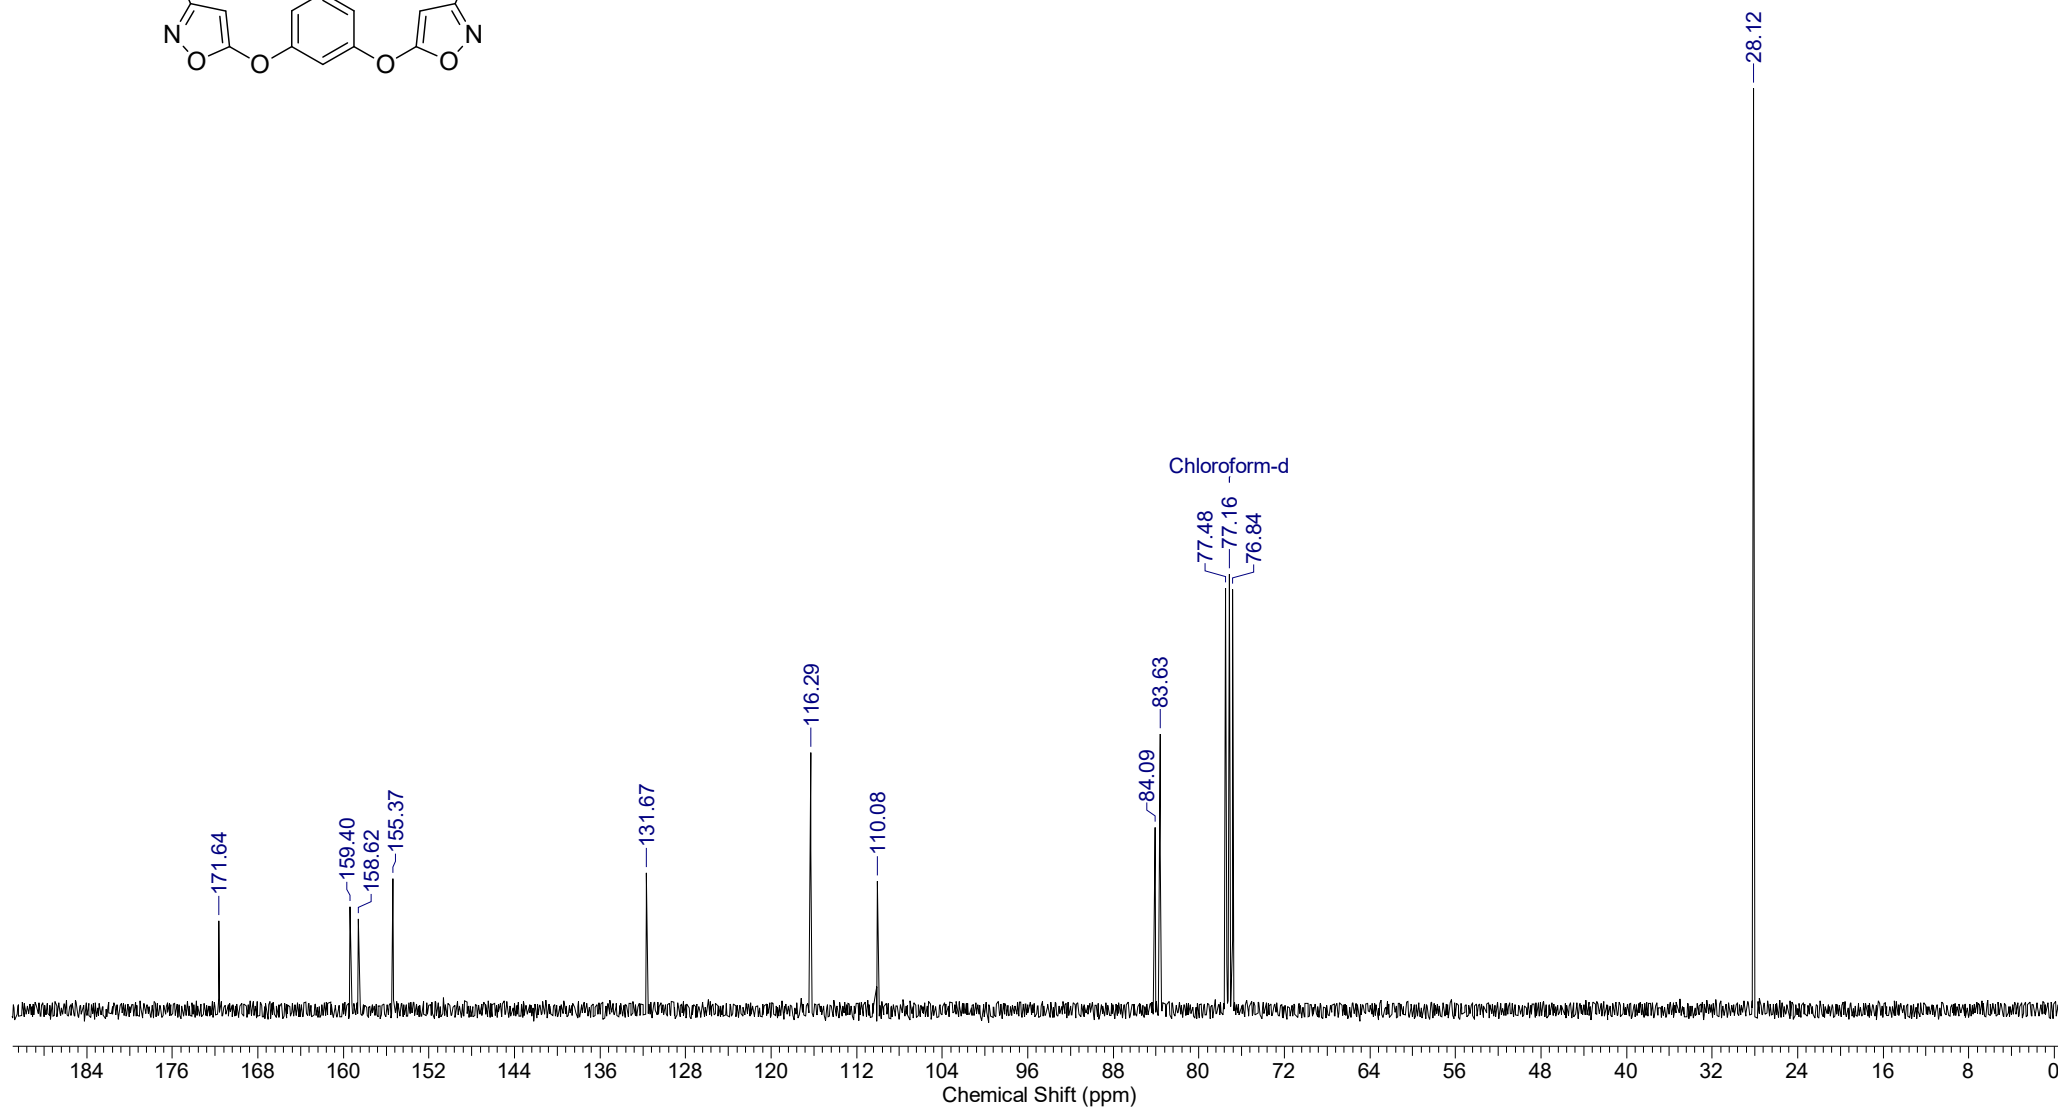

Di-tert-butyl 5,5'-[1,4-phenylenebis(oxy)]diisoxazole-3-carboxylate **2m** ( $^1\text{H}$  NMR)

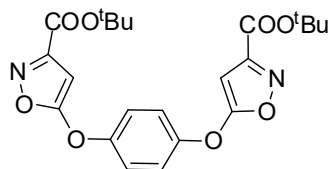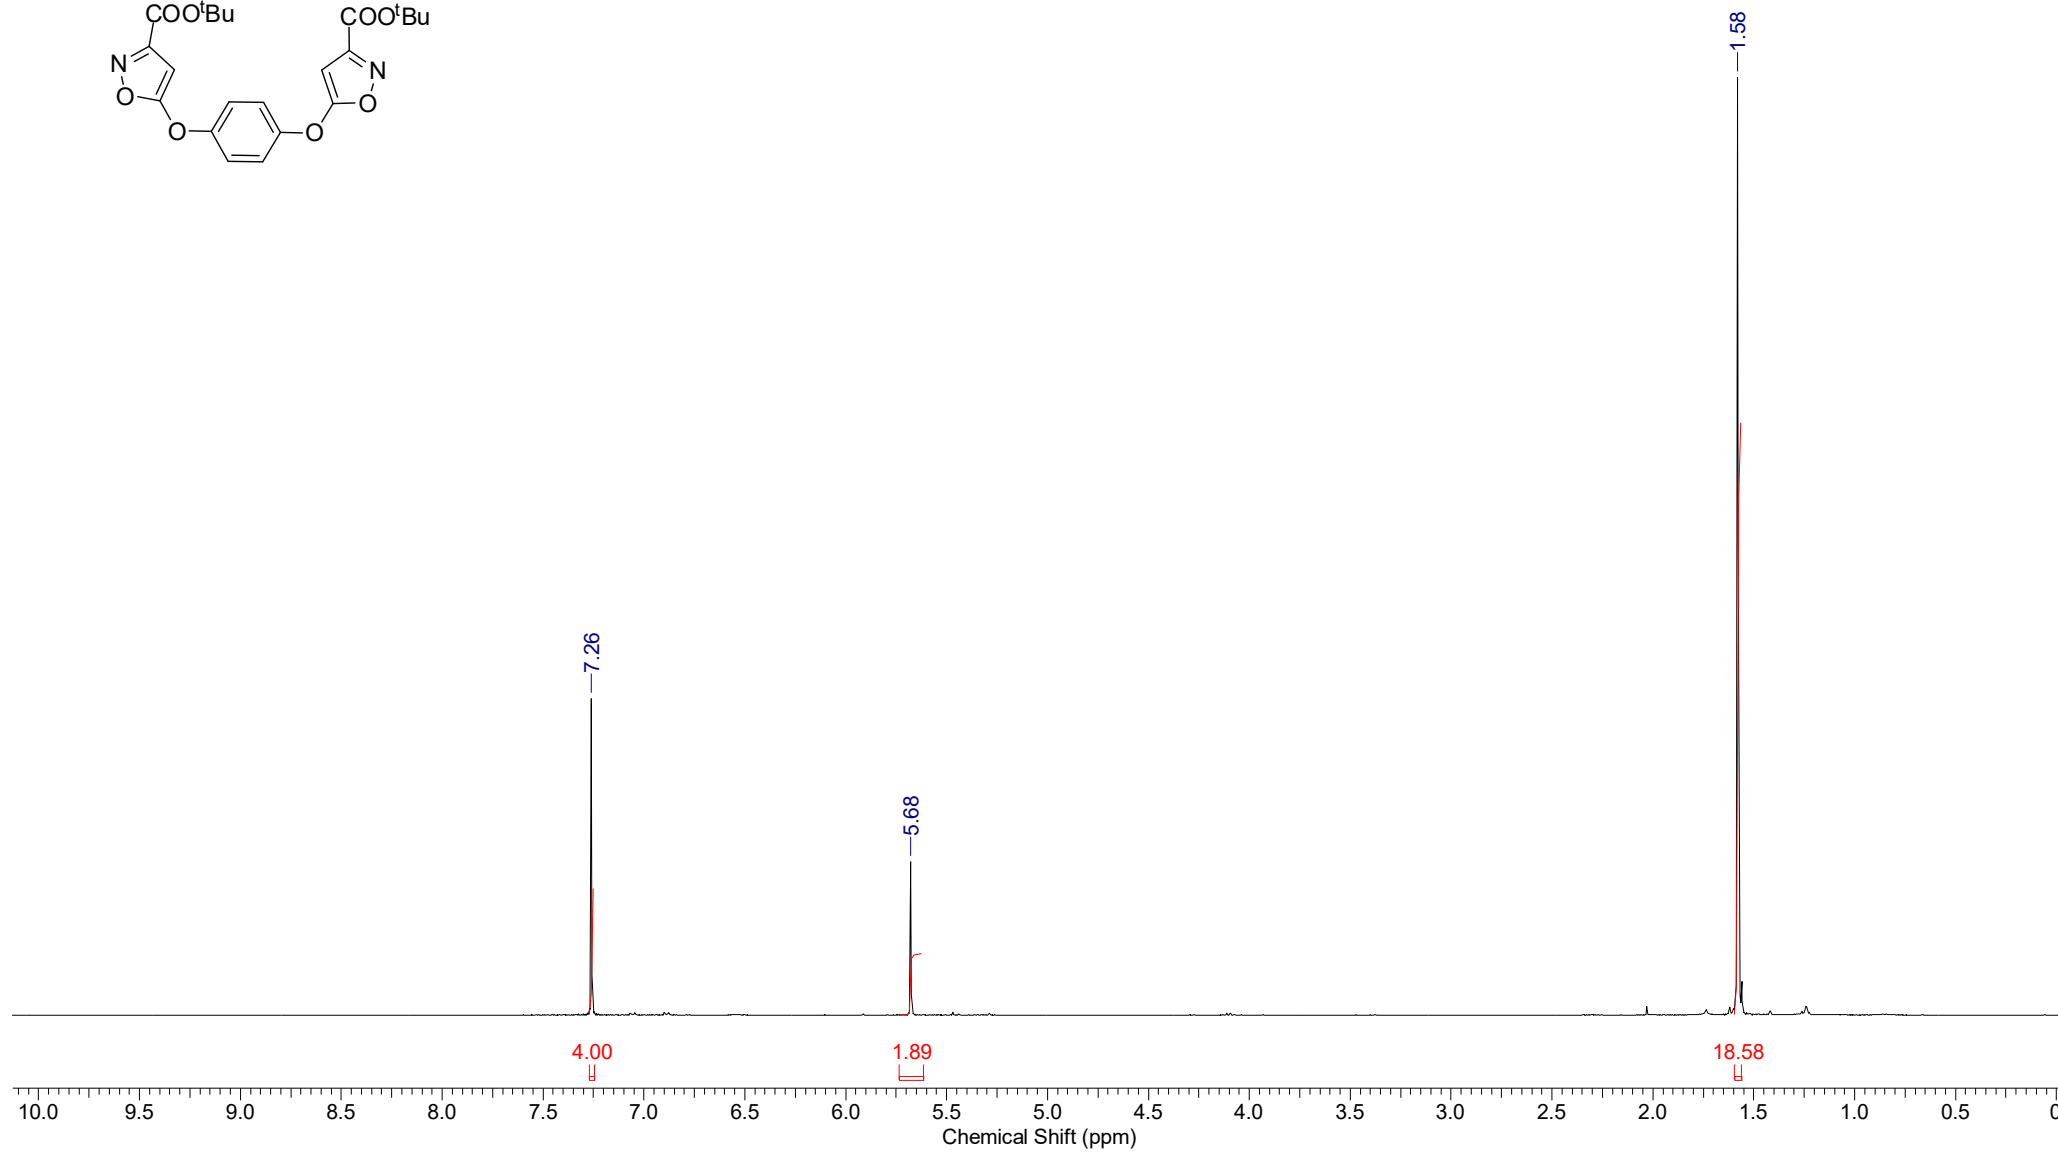

# Di-tert-butyl 5,5'-[1,4-phenylenebis(oxy)]diisoxazole-3-carboxylate **2m** ( $^{13}\text{C}$ NMR)

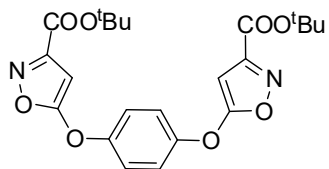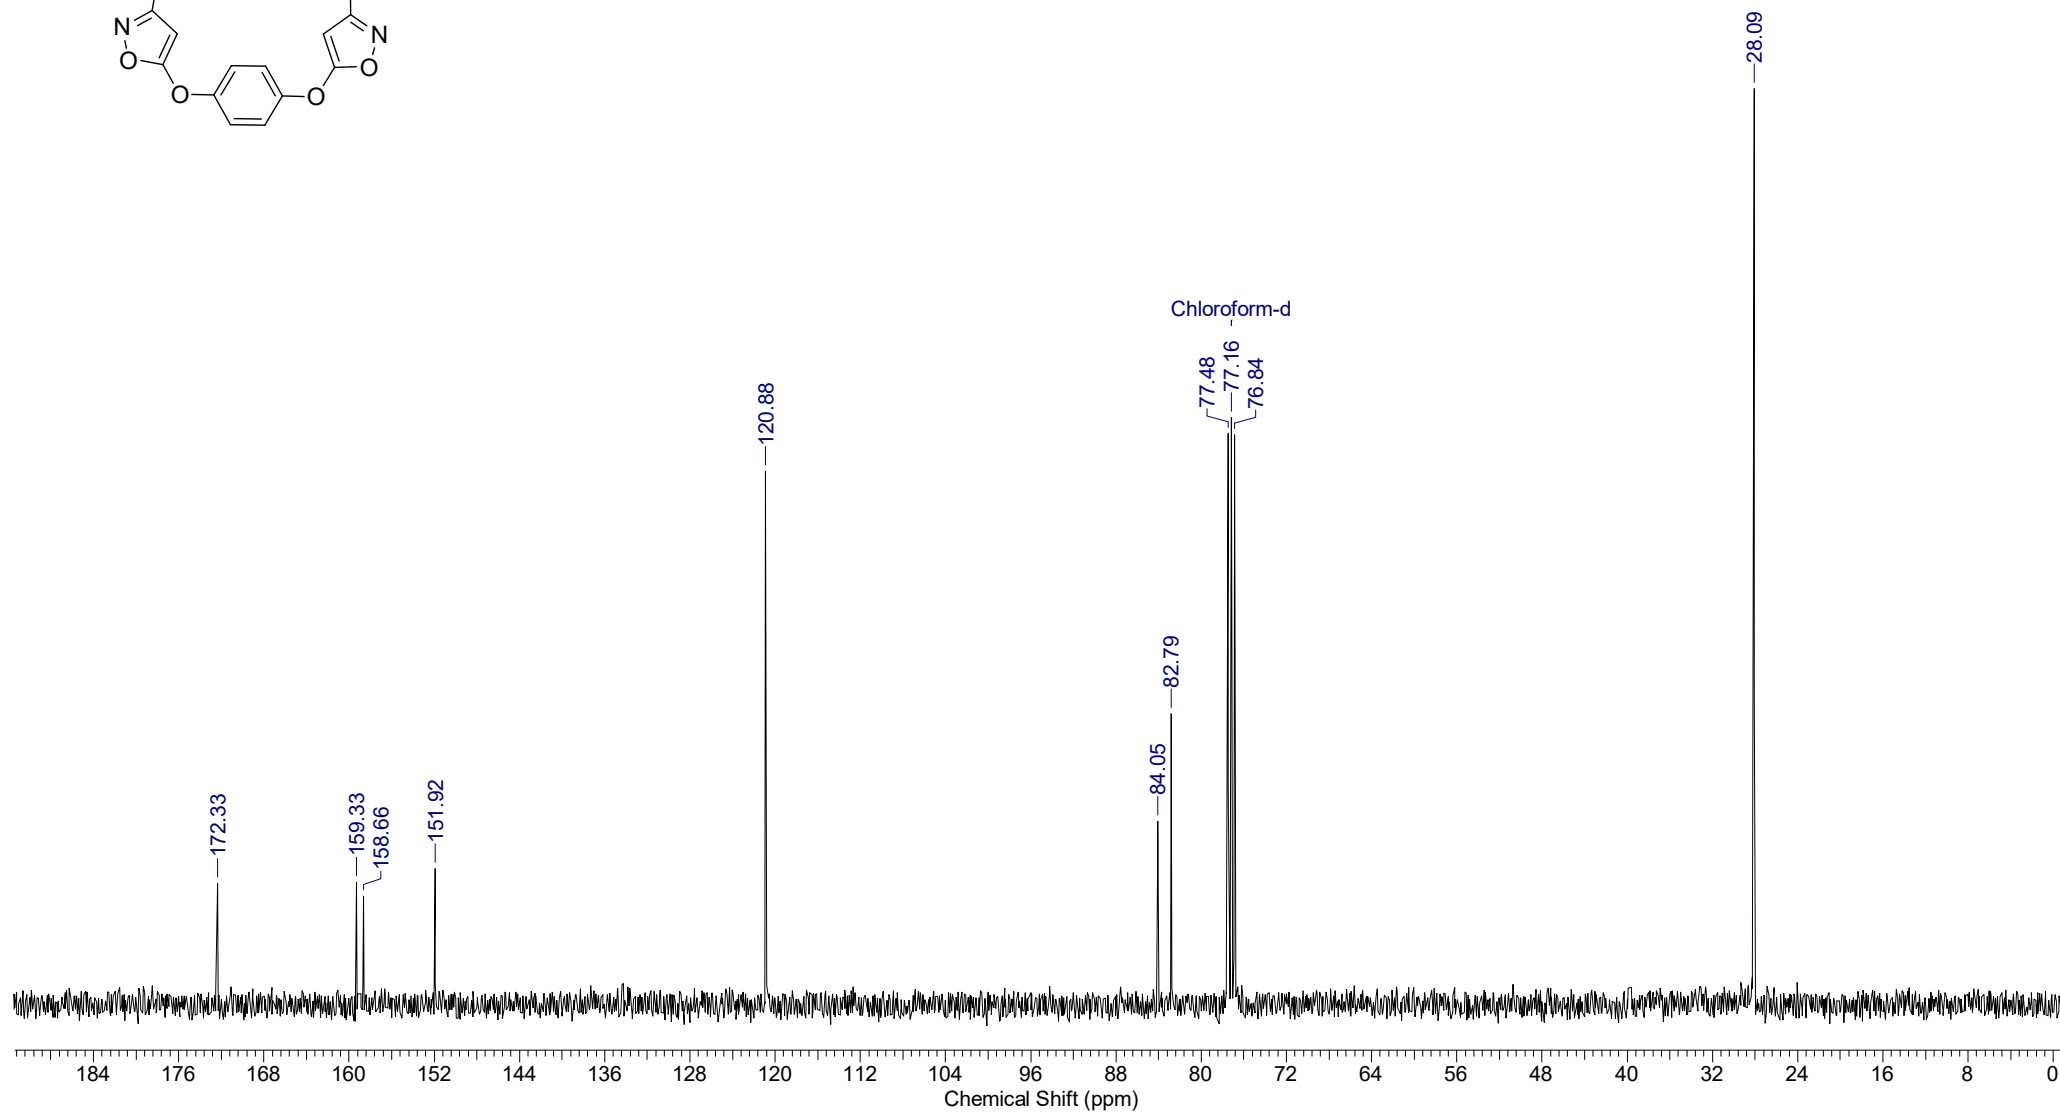

tert-Butyl 5-(phenylsulfanyl)isoxazole-3-carboxylate **2n** ( $^1\text{H}$  NMR)

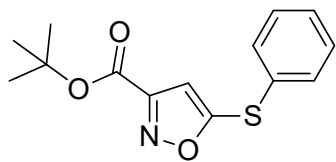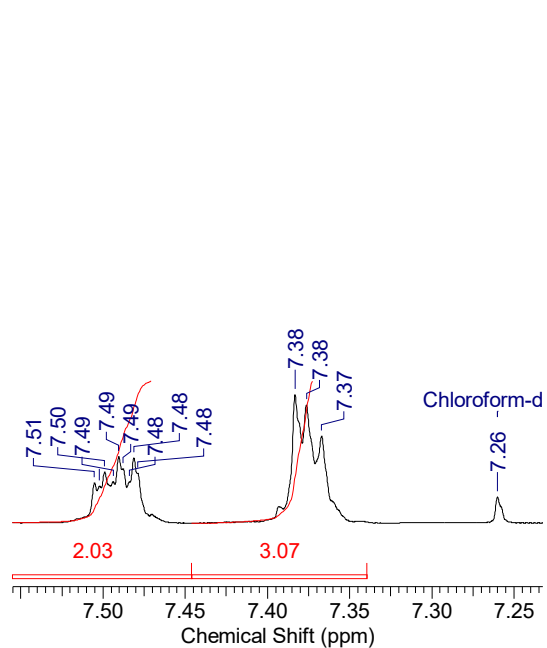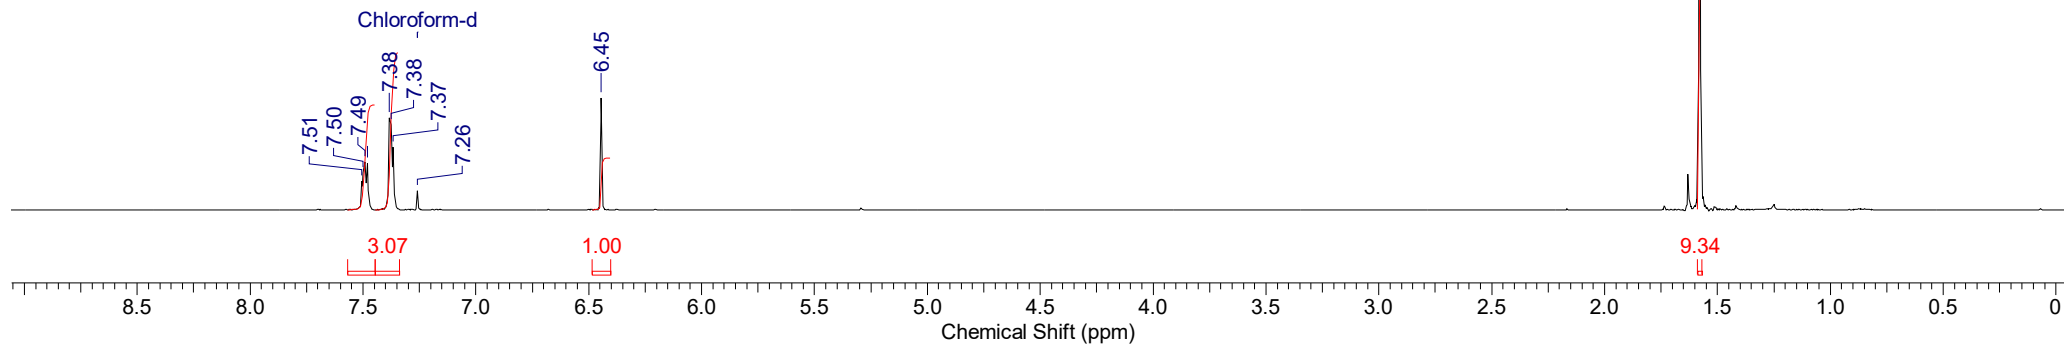

tert-Butyl 5-(phenylsulfanyl)isoxazole-3-carboxylate **2n** ( $^{13}\text{C}$  NMR)

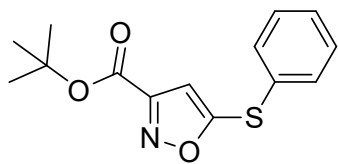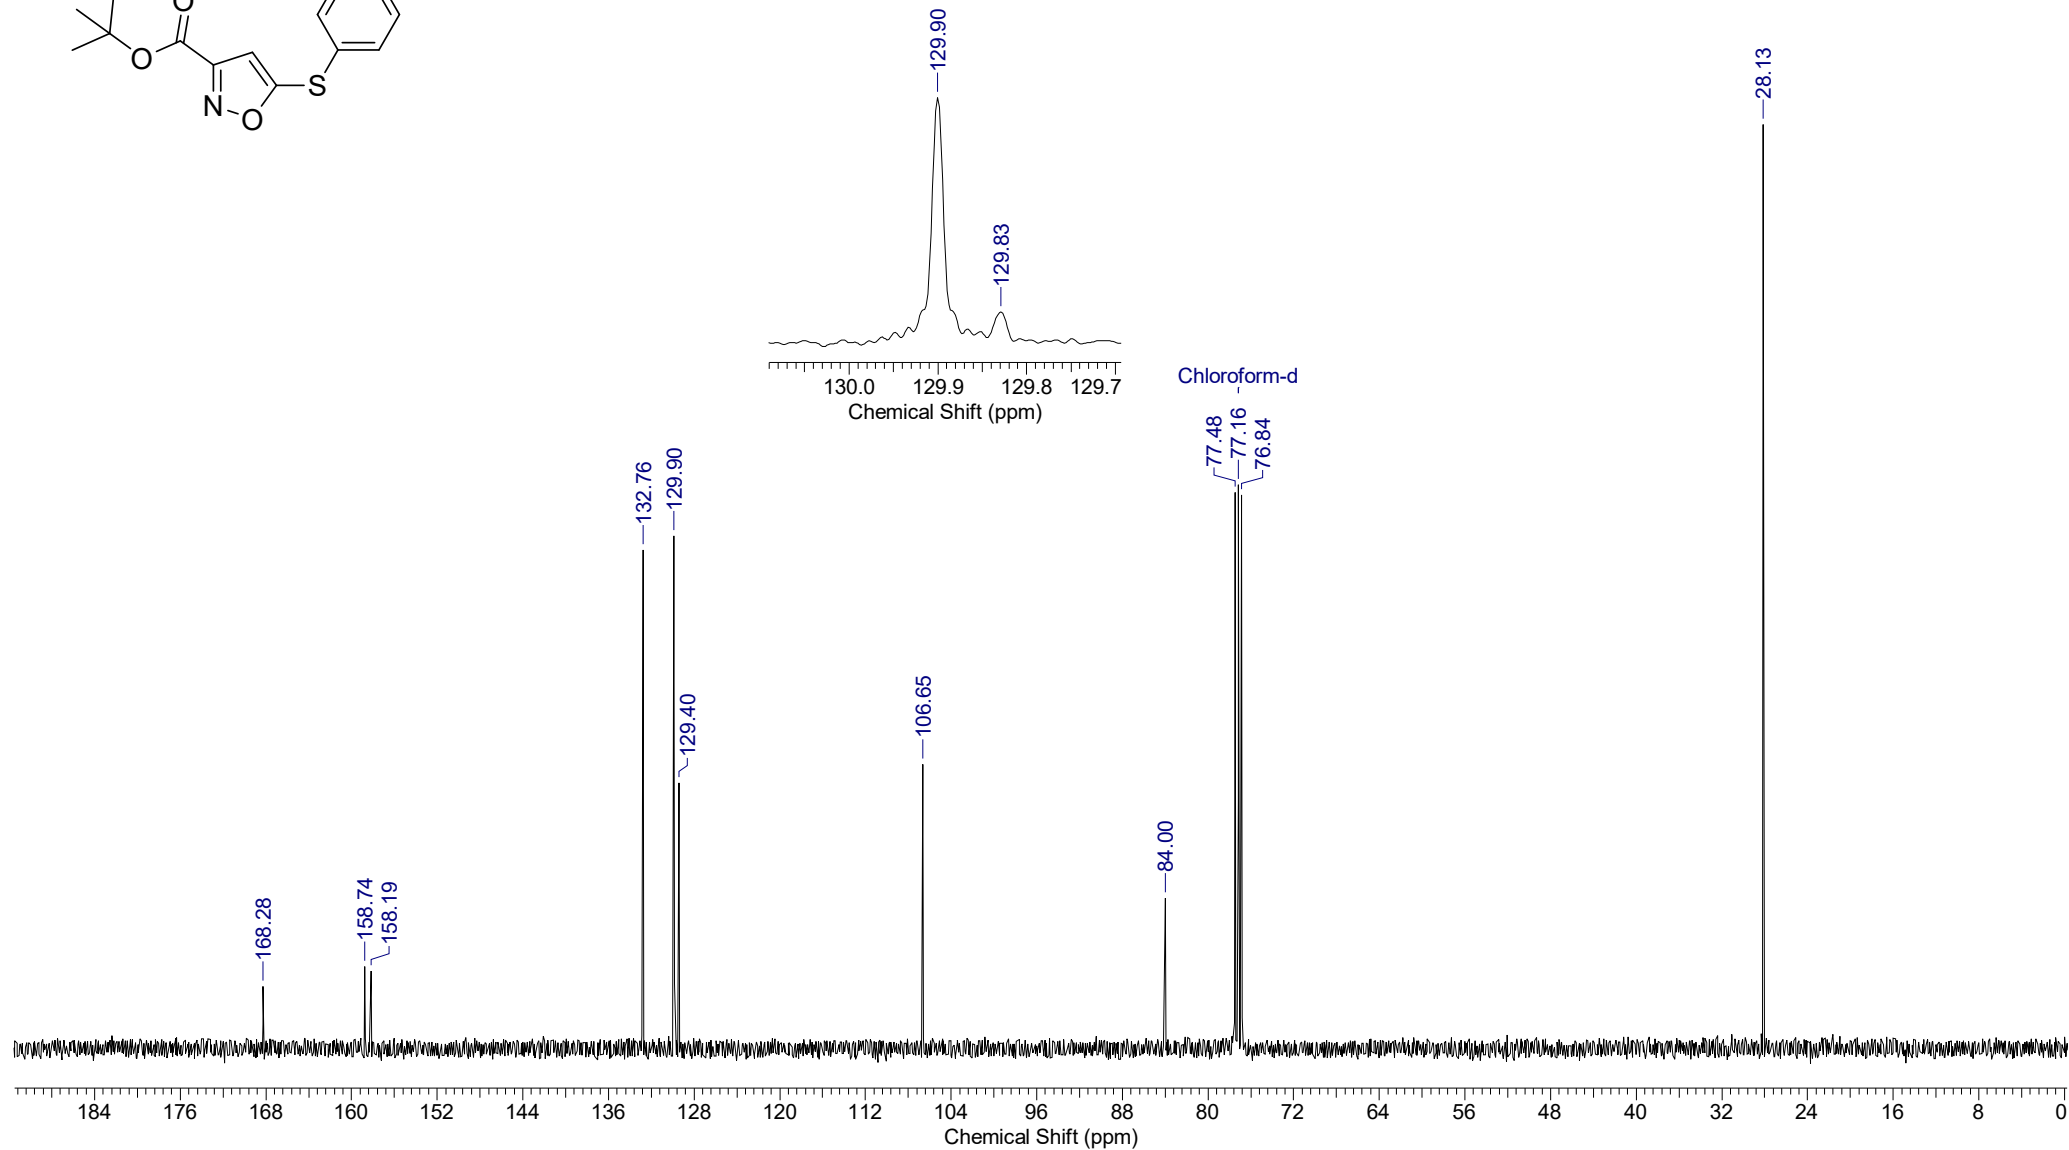

tert-Butyl 5-(benzylsulfanyl)isoxazole-3-carboxylate **2o** ( $^1\text{H}$  NMR)

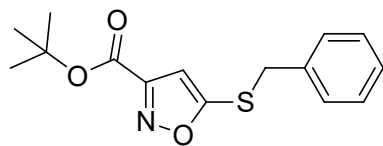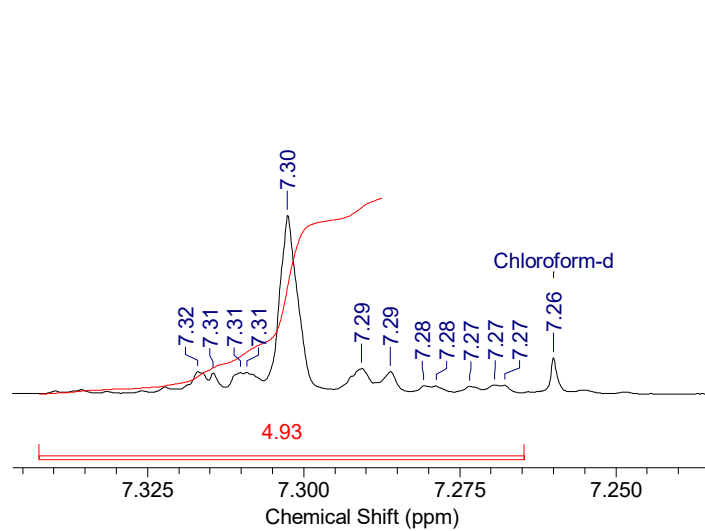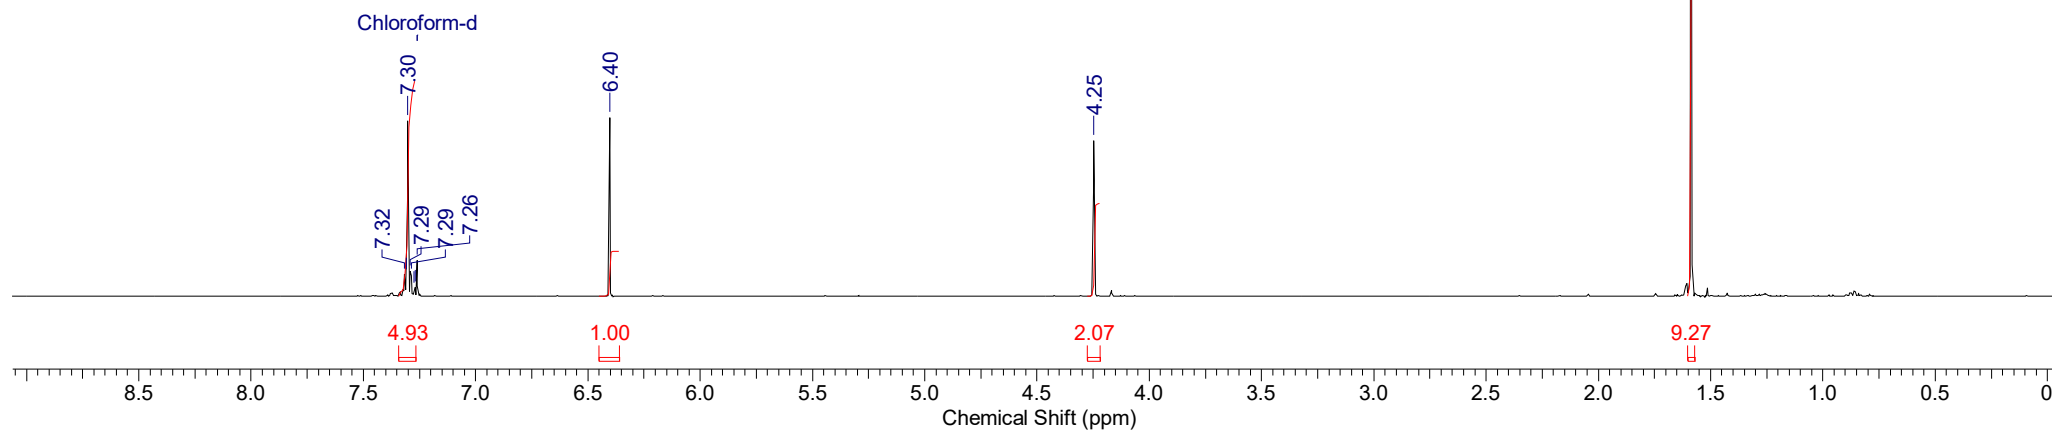



tert-Butyl 5-(benzylsulfanyl)isoxazole-3-carboxylate **2o** ( $^{13}\text{C}$  NMR)

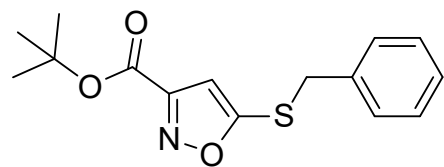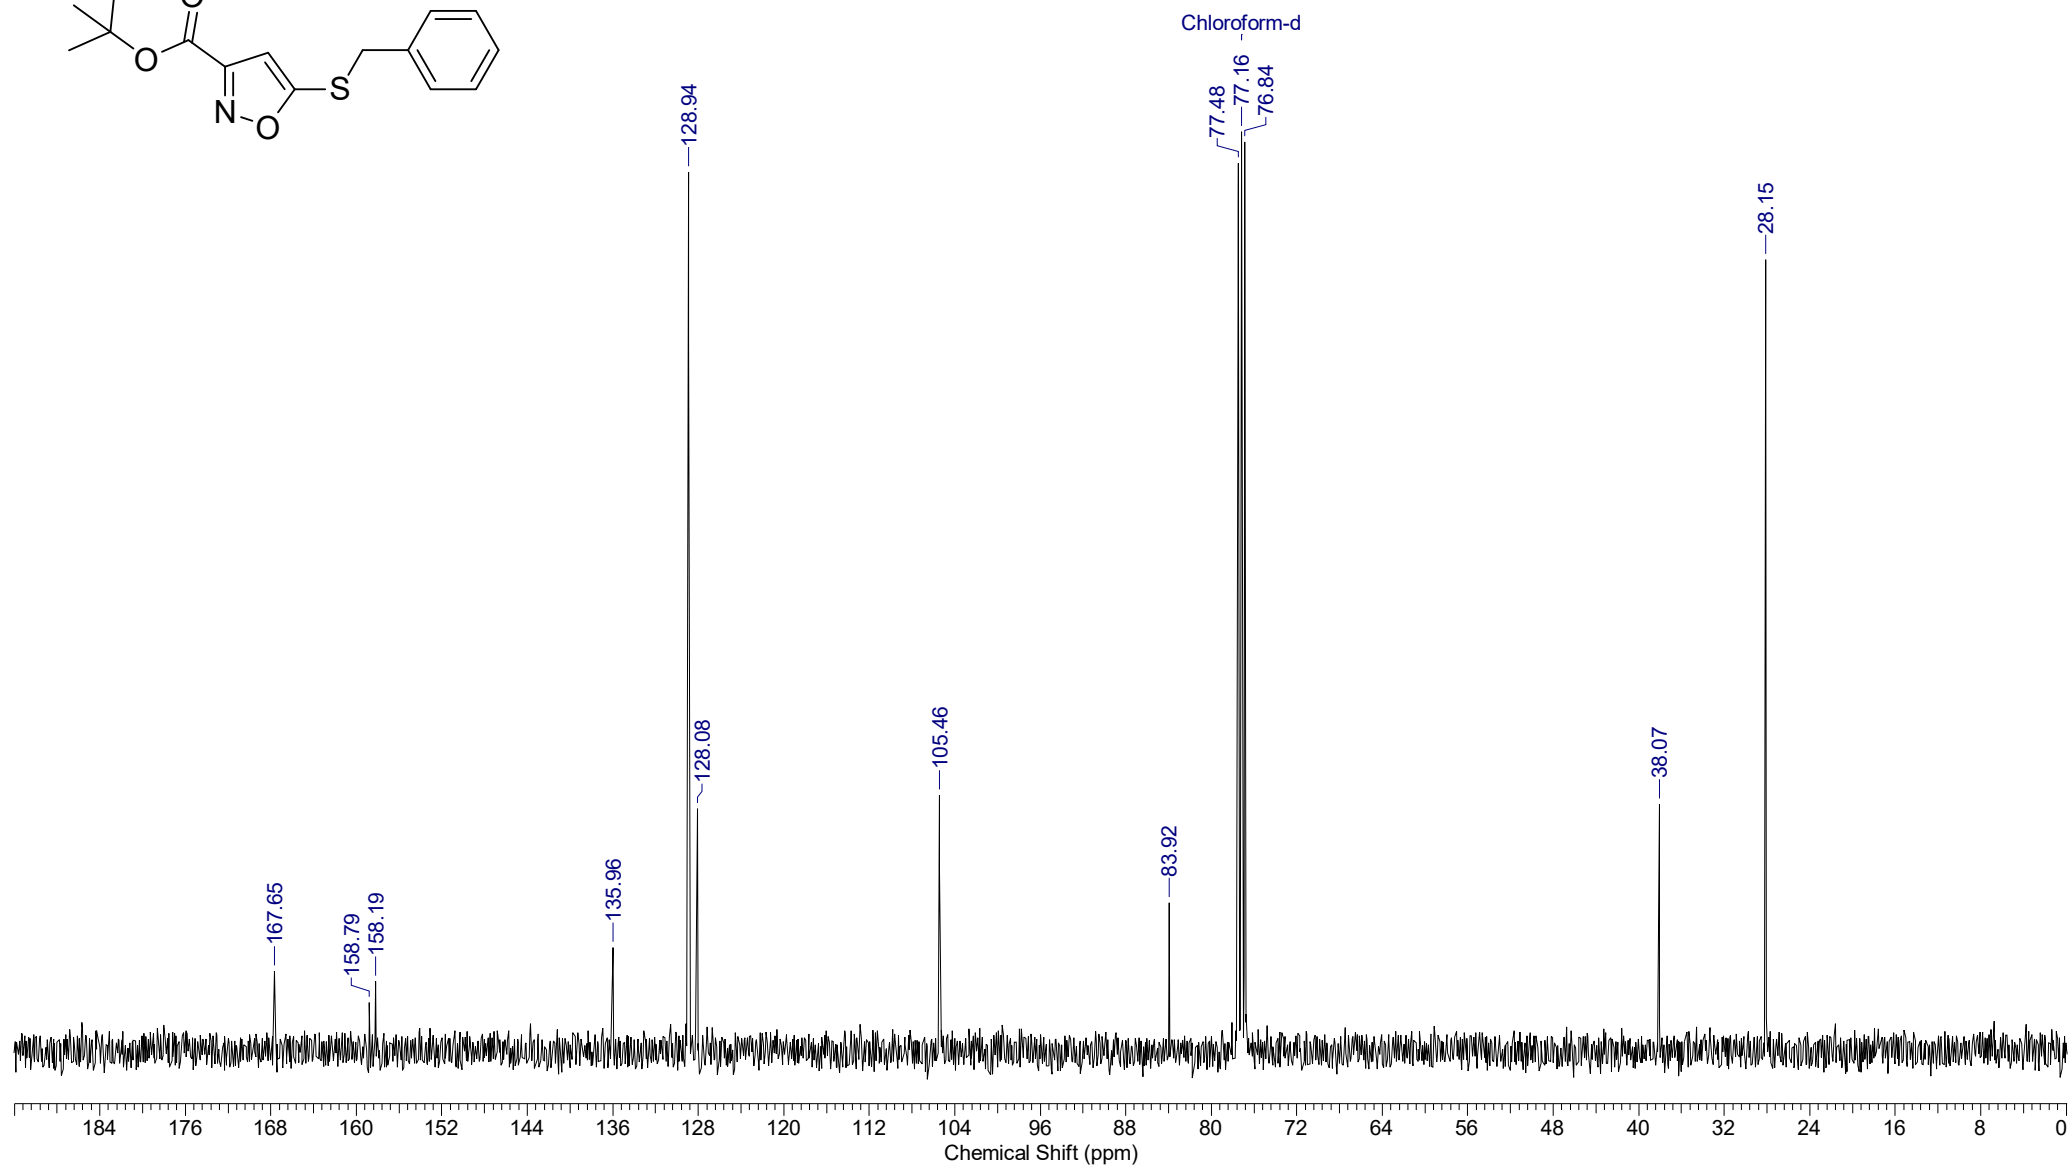

# tert-Butyl isoxazole-3-carboxylate **2p** ( $^1\text{H}$ NMR)

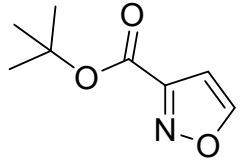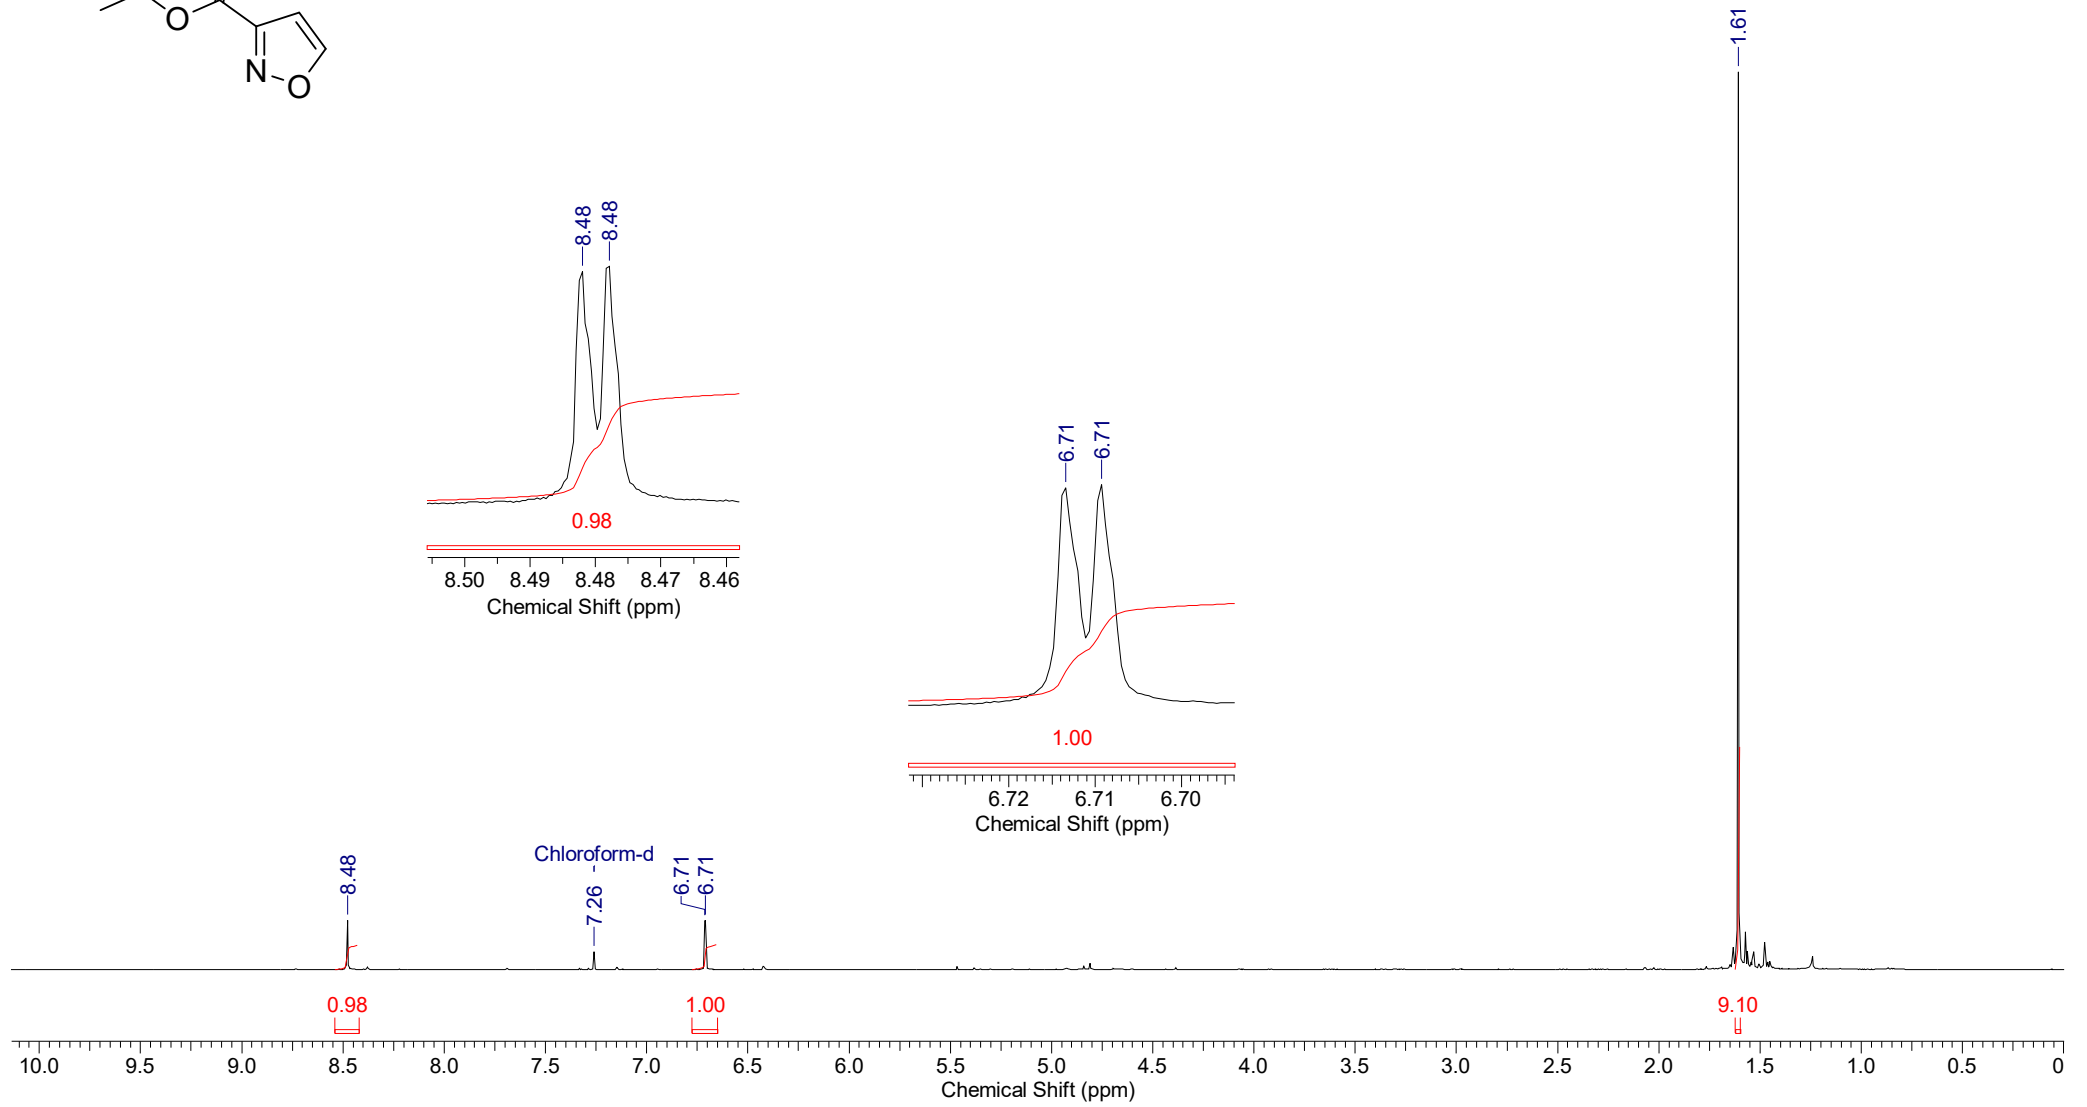

tert-Butyl isoxazole-3-carboxylate **2p** ( $^{13}\text{C}$  NMR)

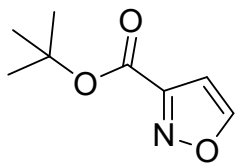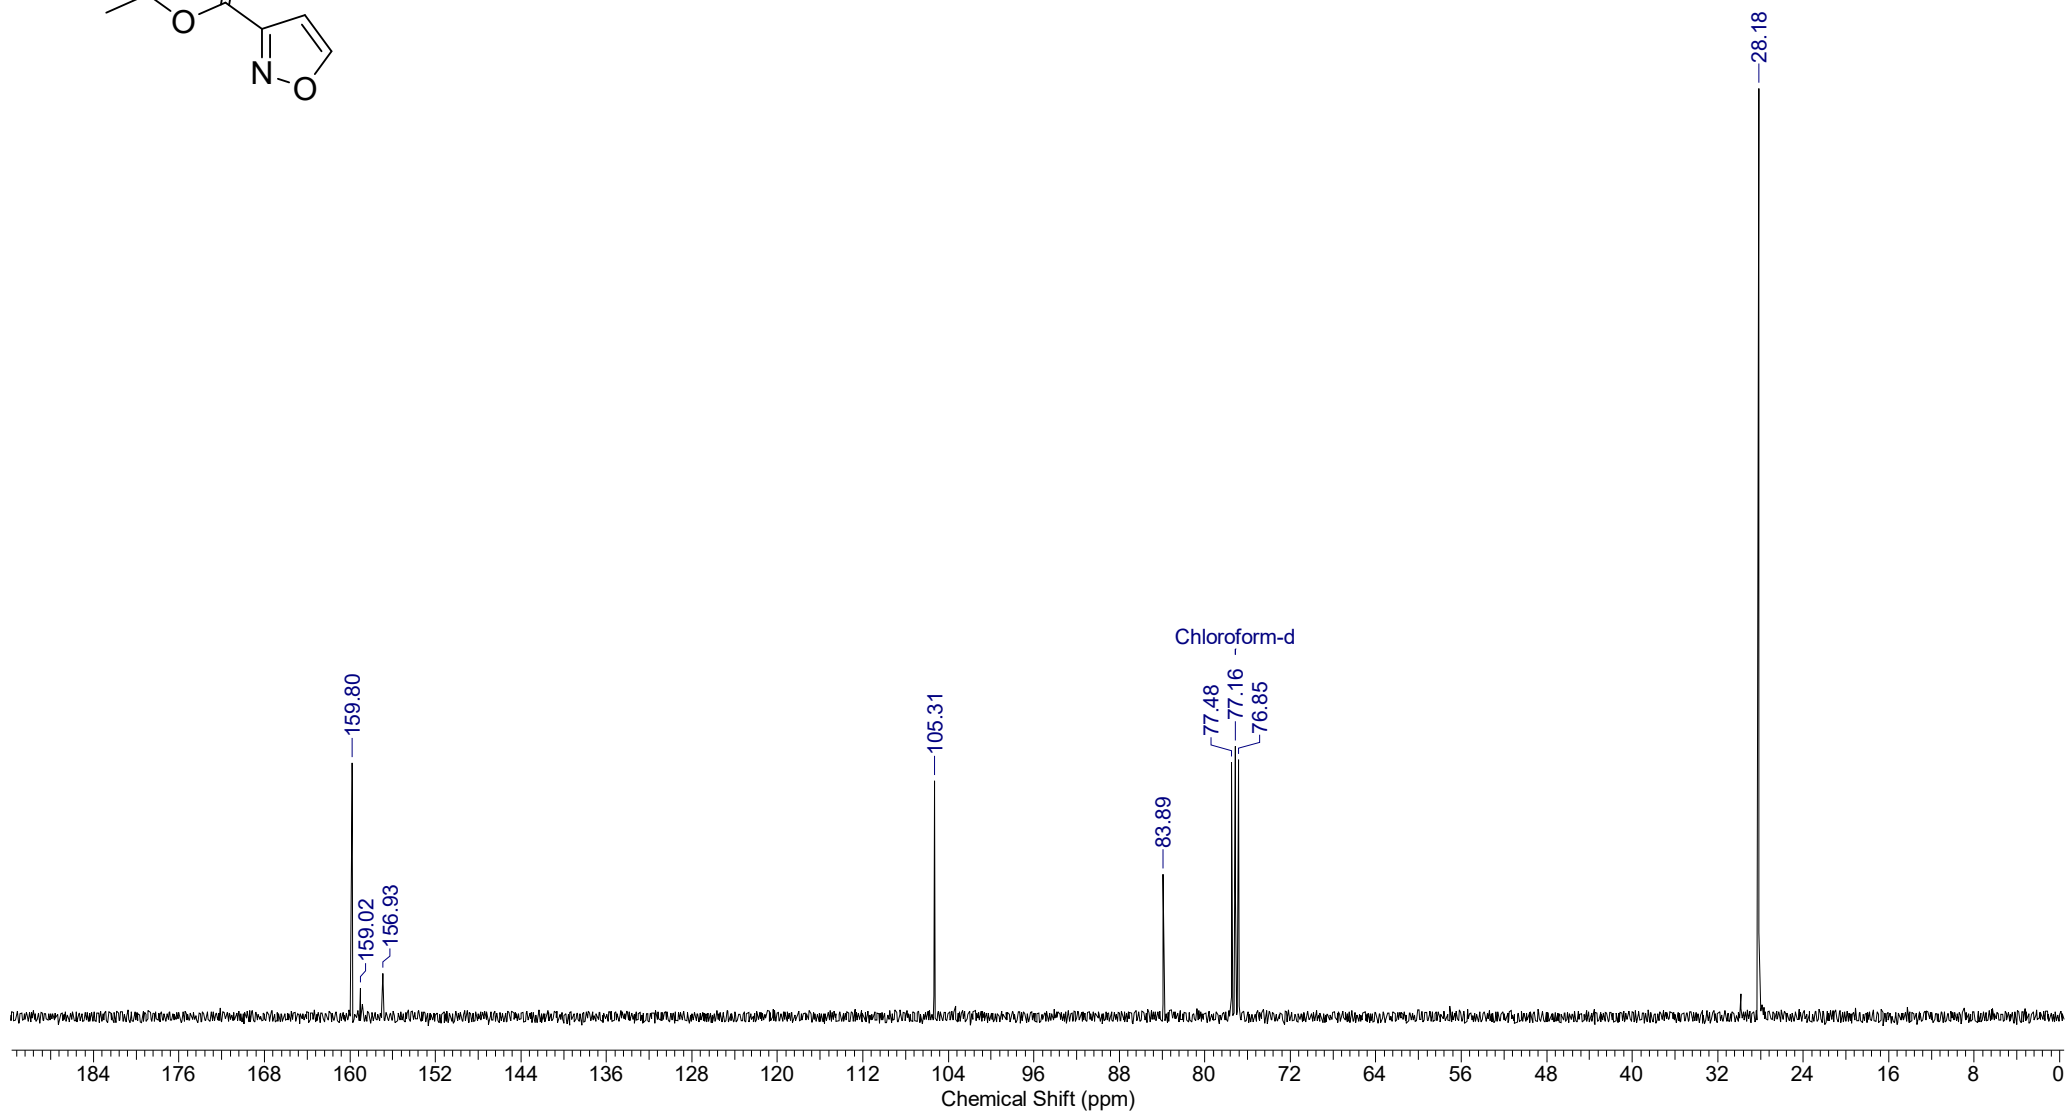

tert-Butyl isoxazole-3-carboxylate **2p** (HMBS)

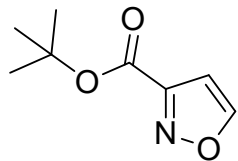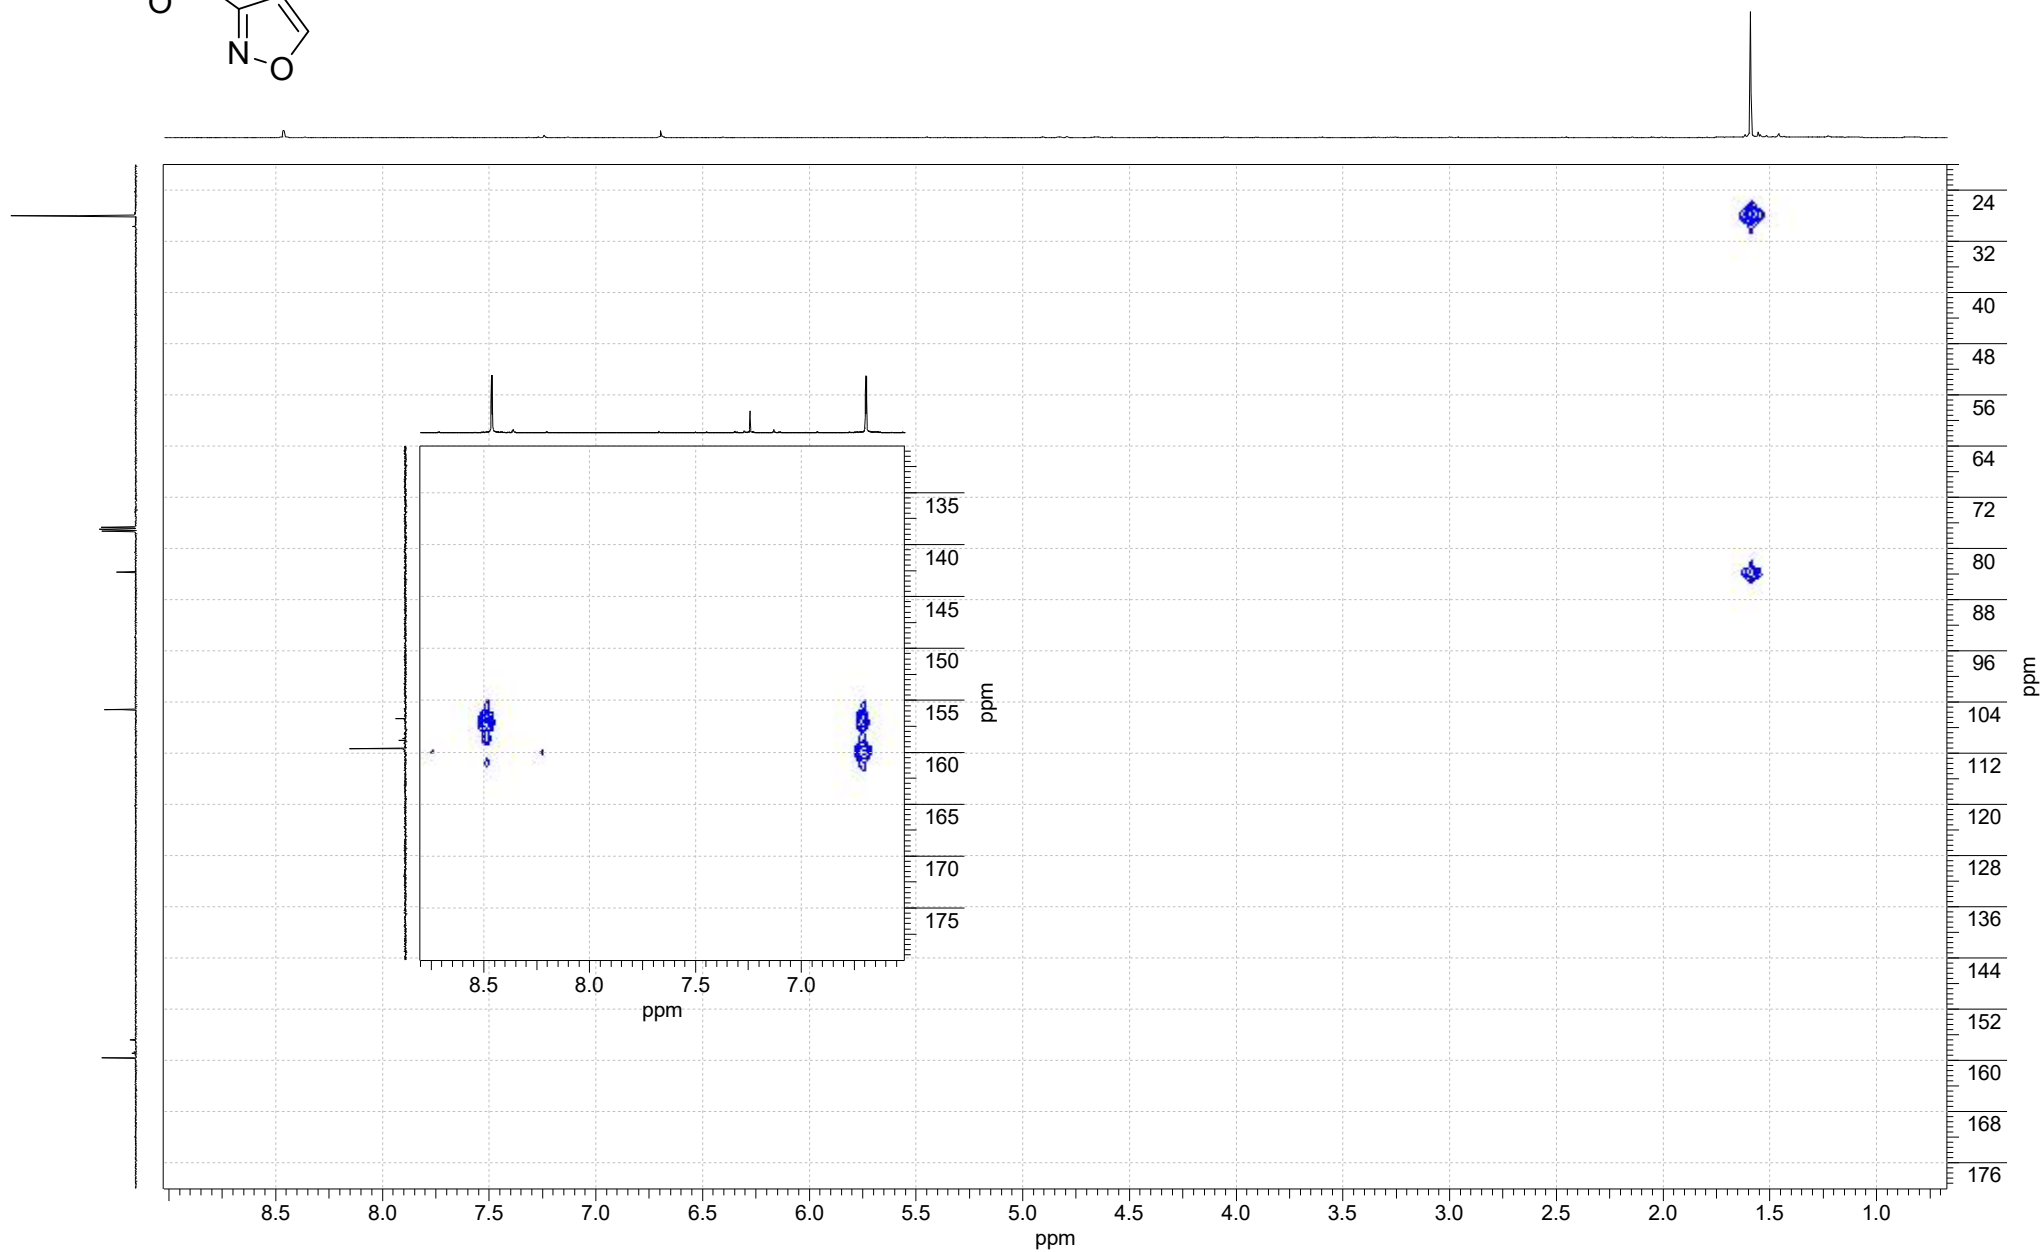

# tert-Butyl isoxazole-3-carboxylate **2p** (HSQC)

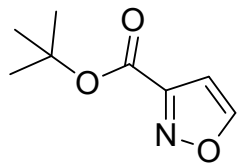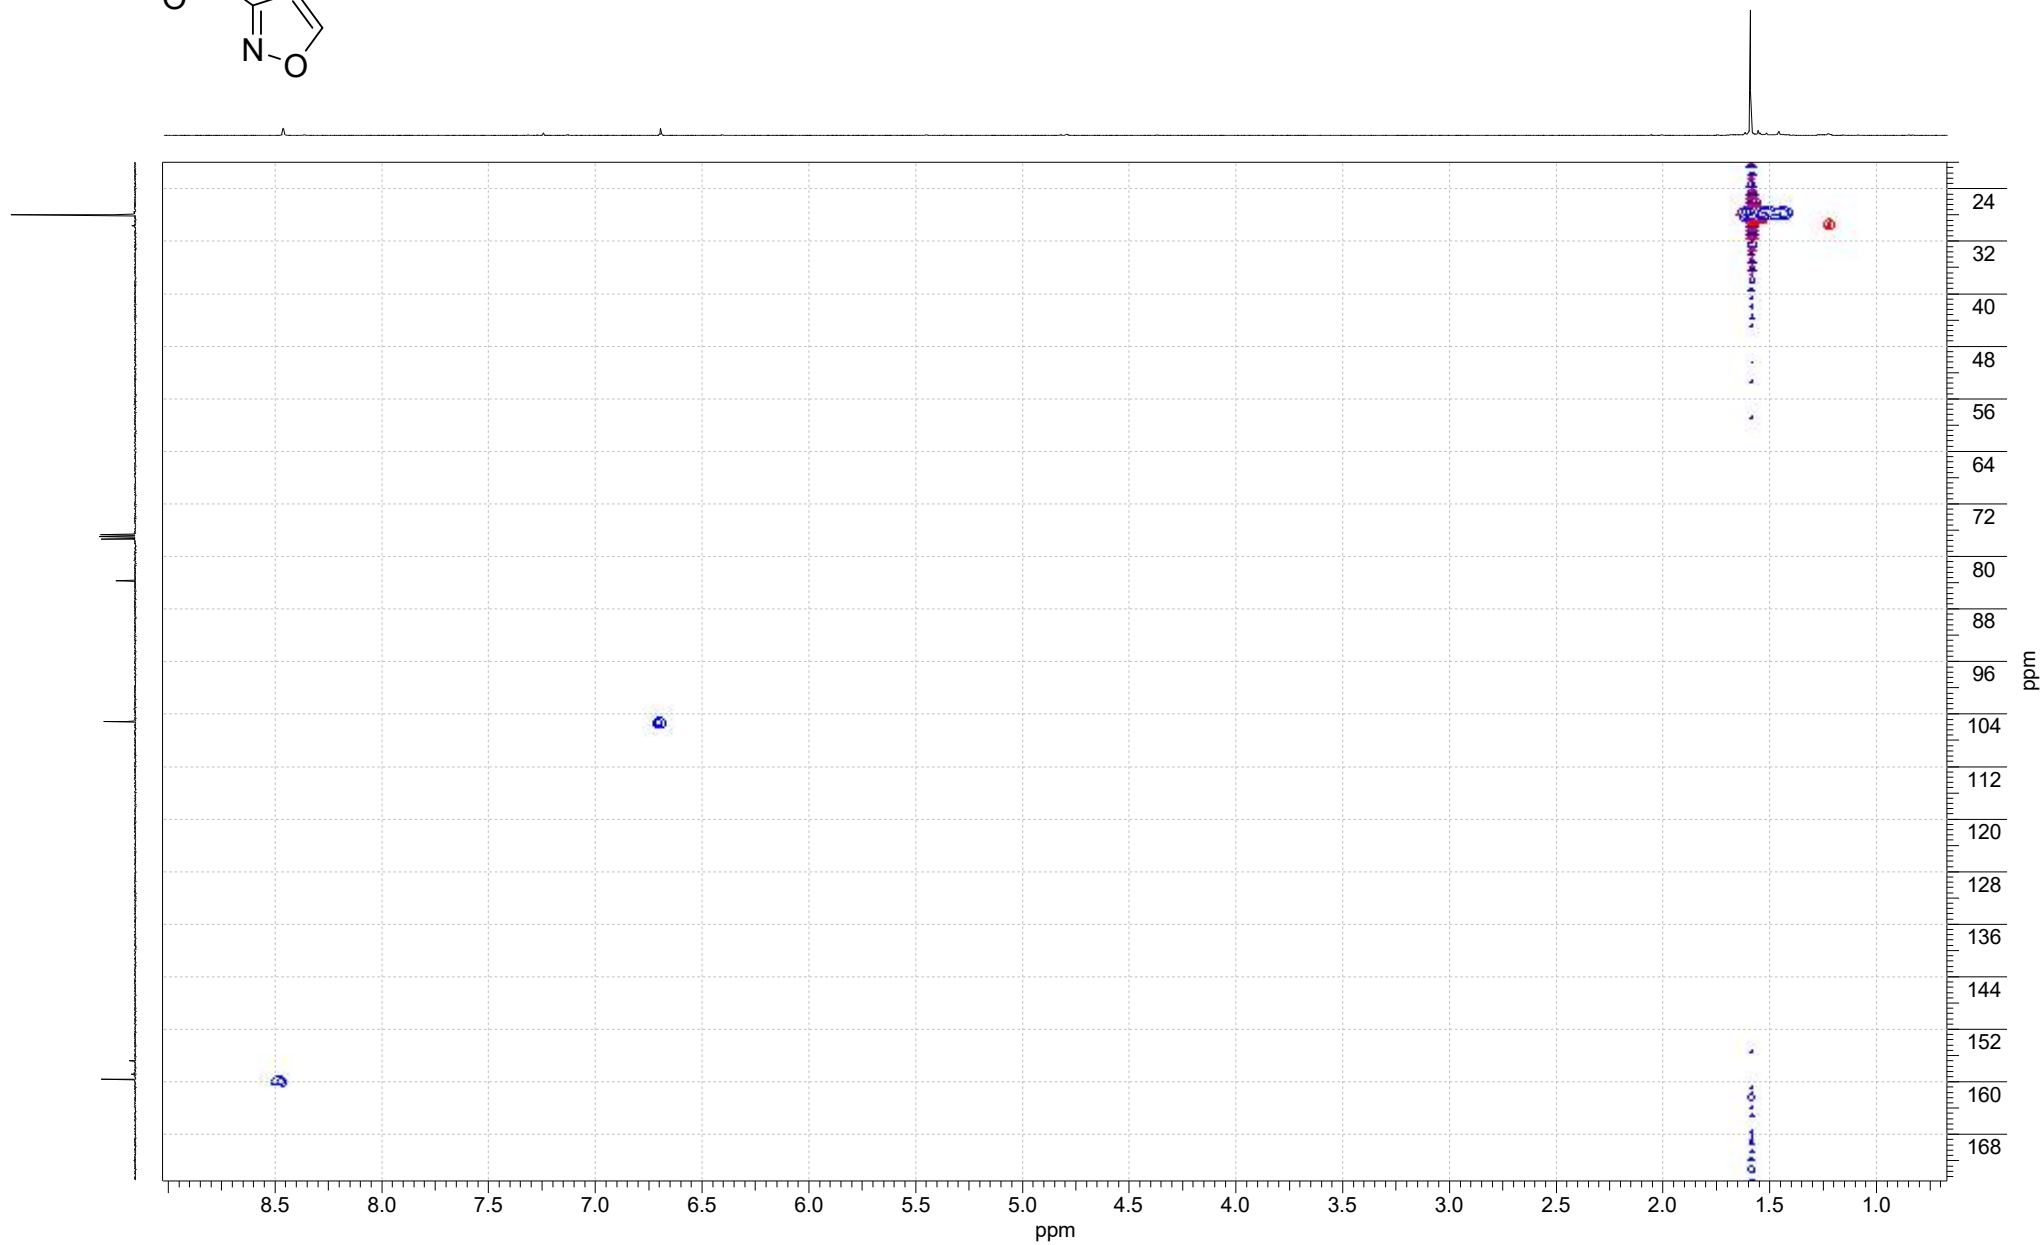

# Methyl 5-morpholinoisoxazole-3-carboxylate **2r** ( $^1\text{H}$ NMR)

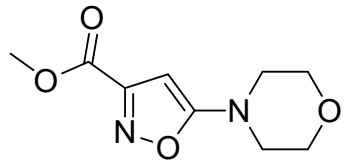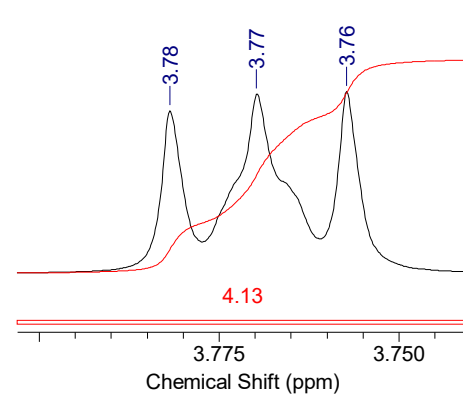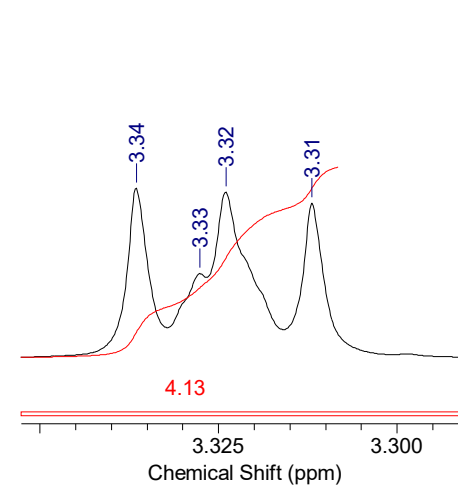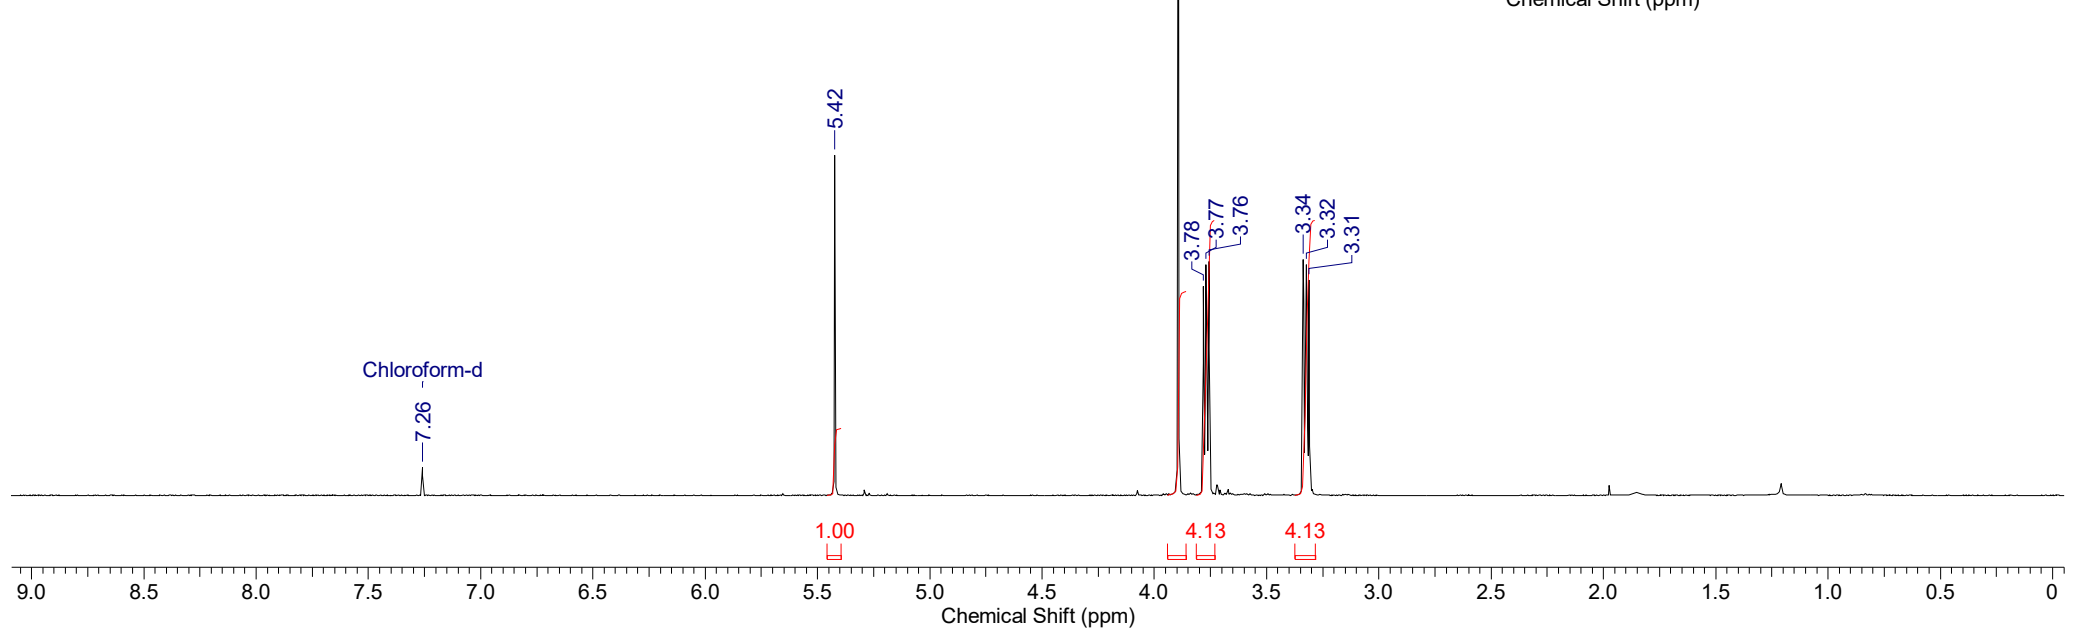

# Methyl 5-morpholinoisoxazole-3-carboxylate **2r** ( $^{13}\text{C}$ NMR)

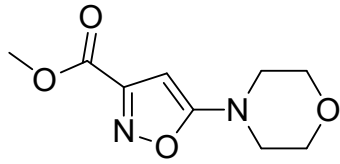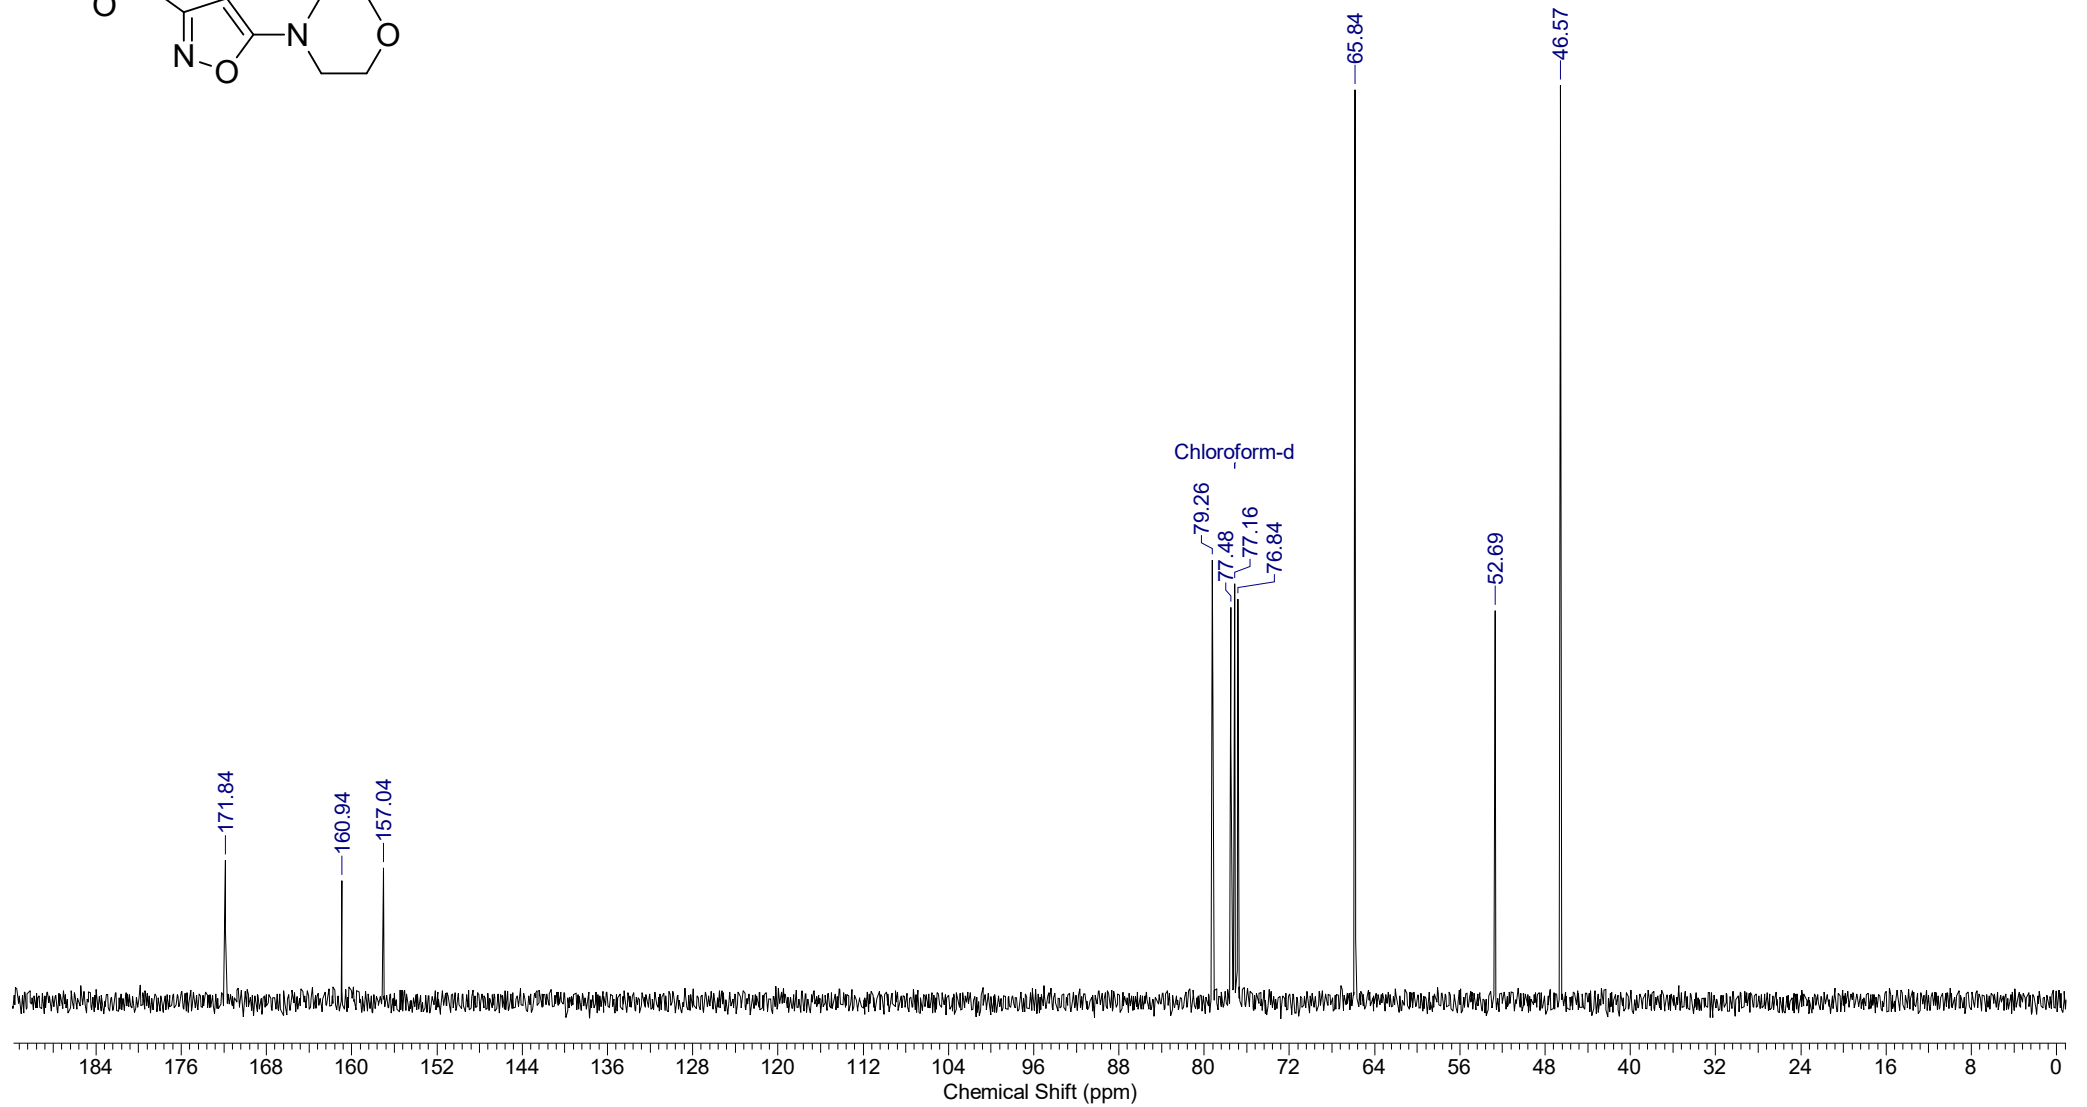

# Methyl 5-phenoxyisoxazole-3-carboxylate **2s** ( $^1\text{H}$ NMR)

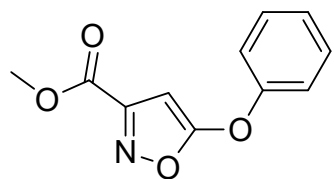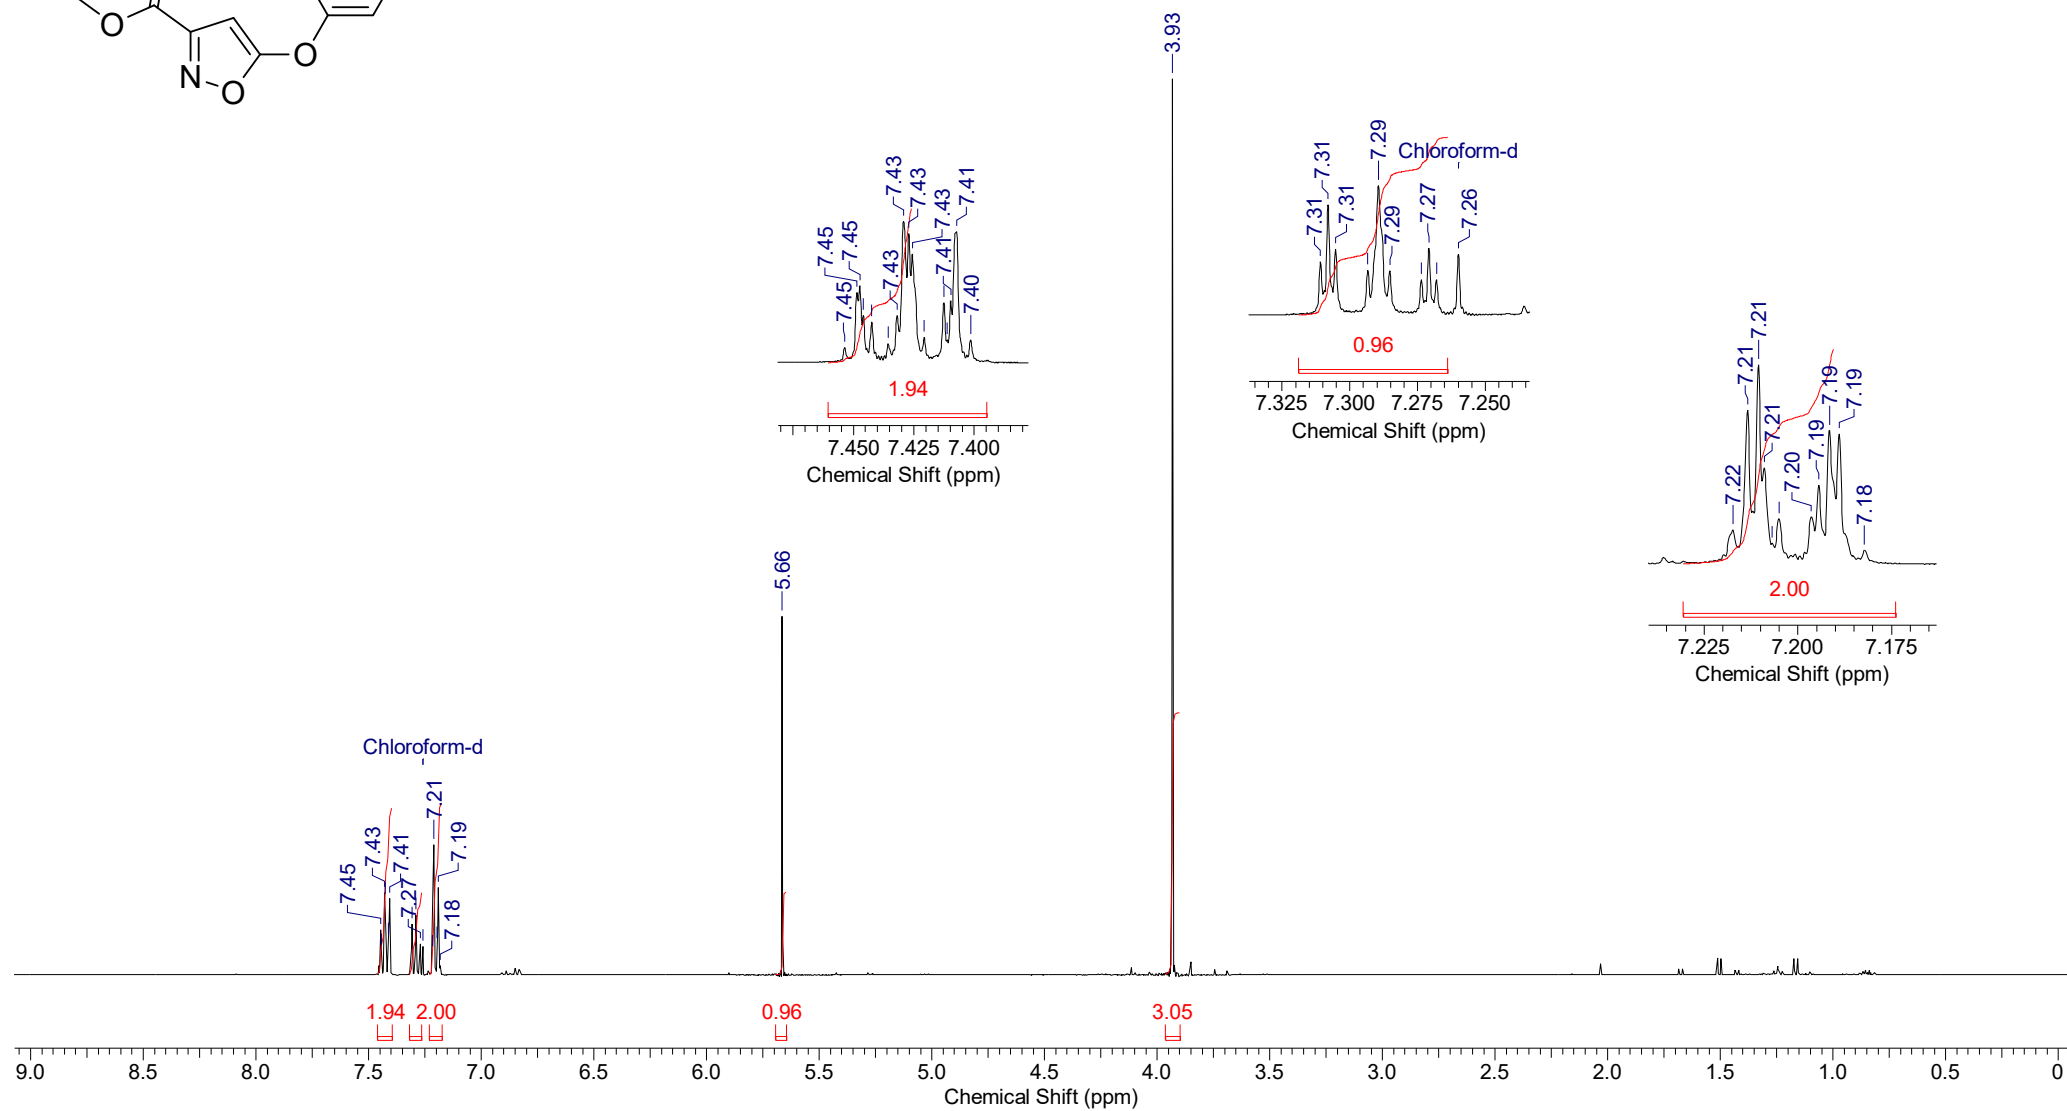



# Methyl 5-phenoxyisoxazole-3-carboxylate **2s** ( $^{13}\text{C}$ NMR)

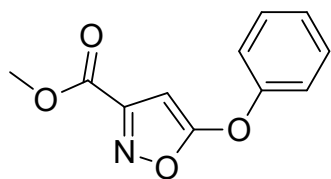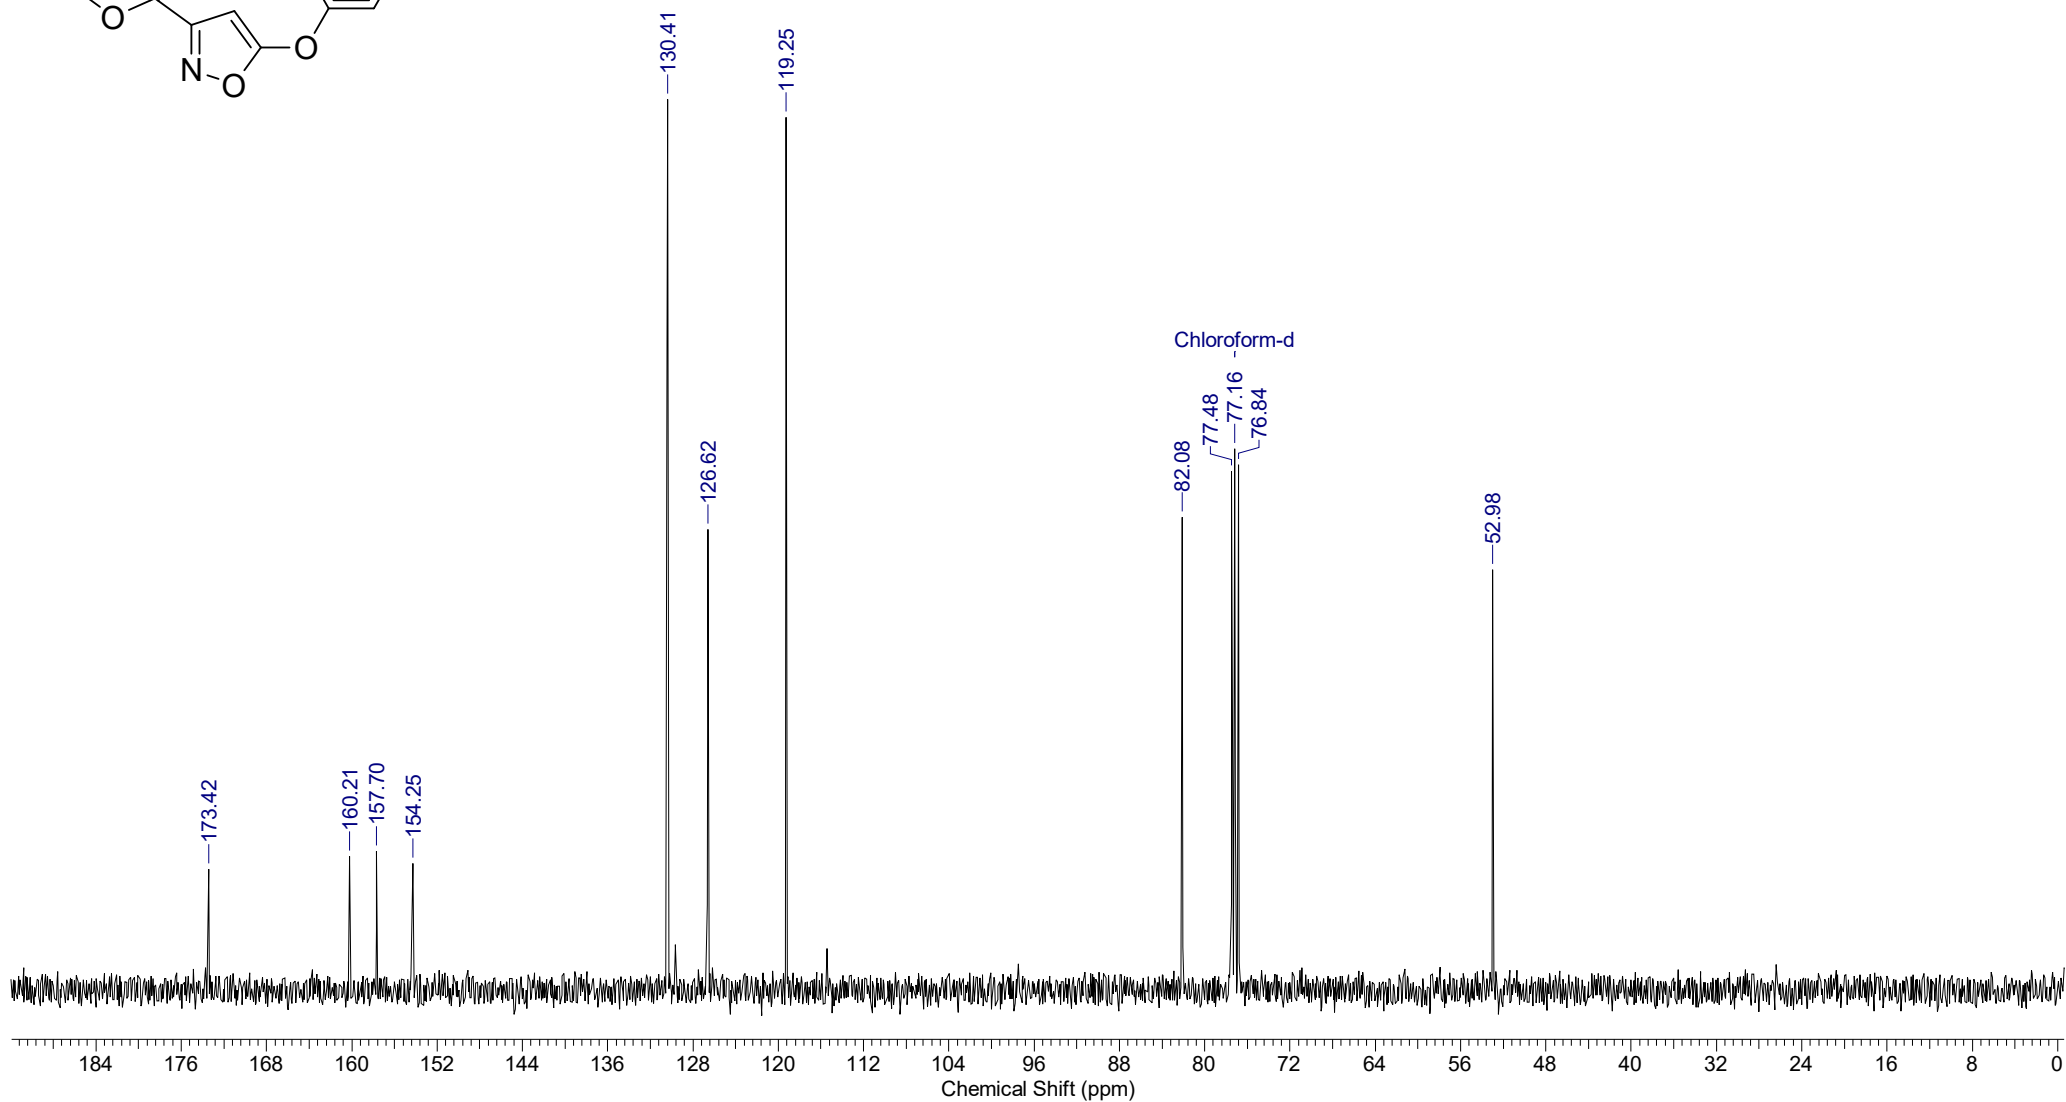

# Methyl 5-(phenylsulfanyl)isoxazole-3-carboxylate **2t** ( $^1\text{H}$ NMR)

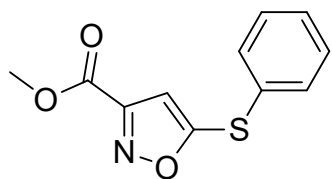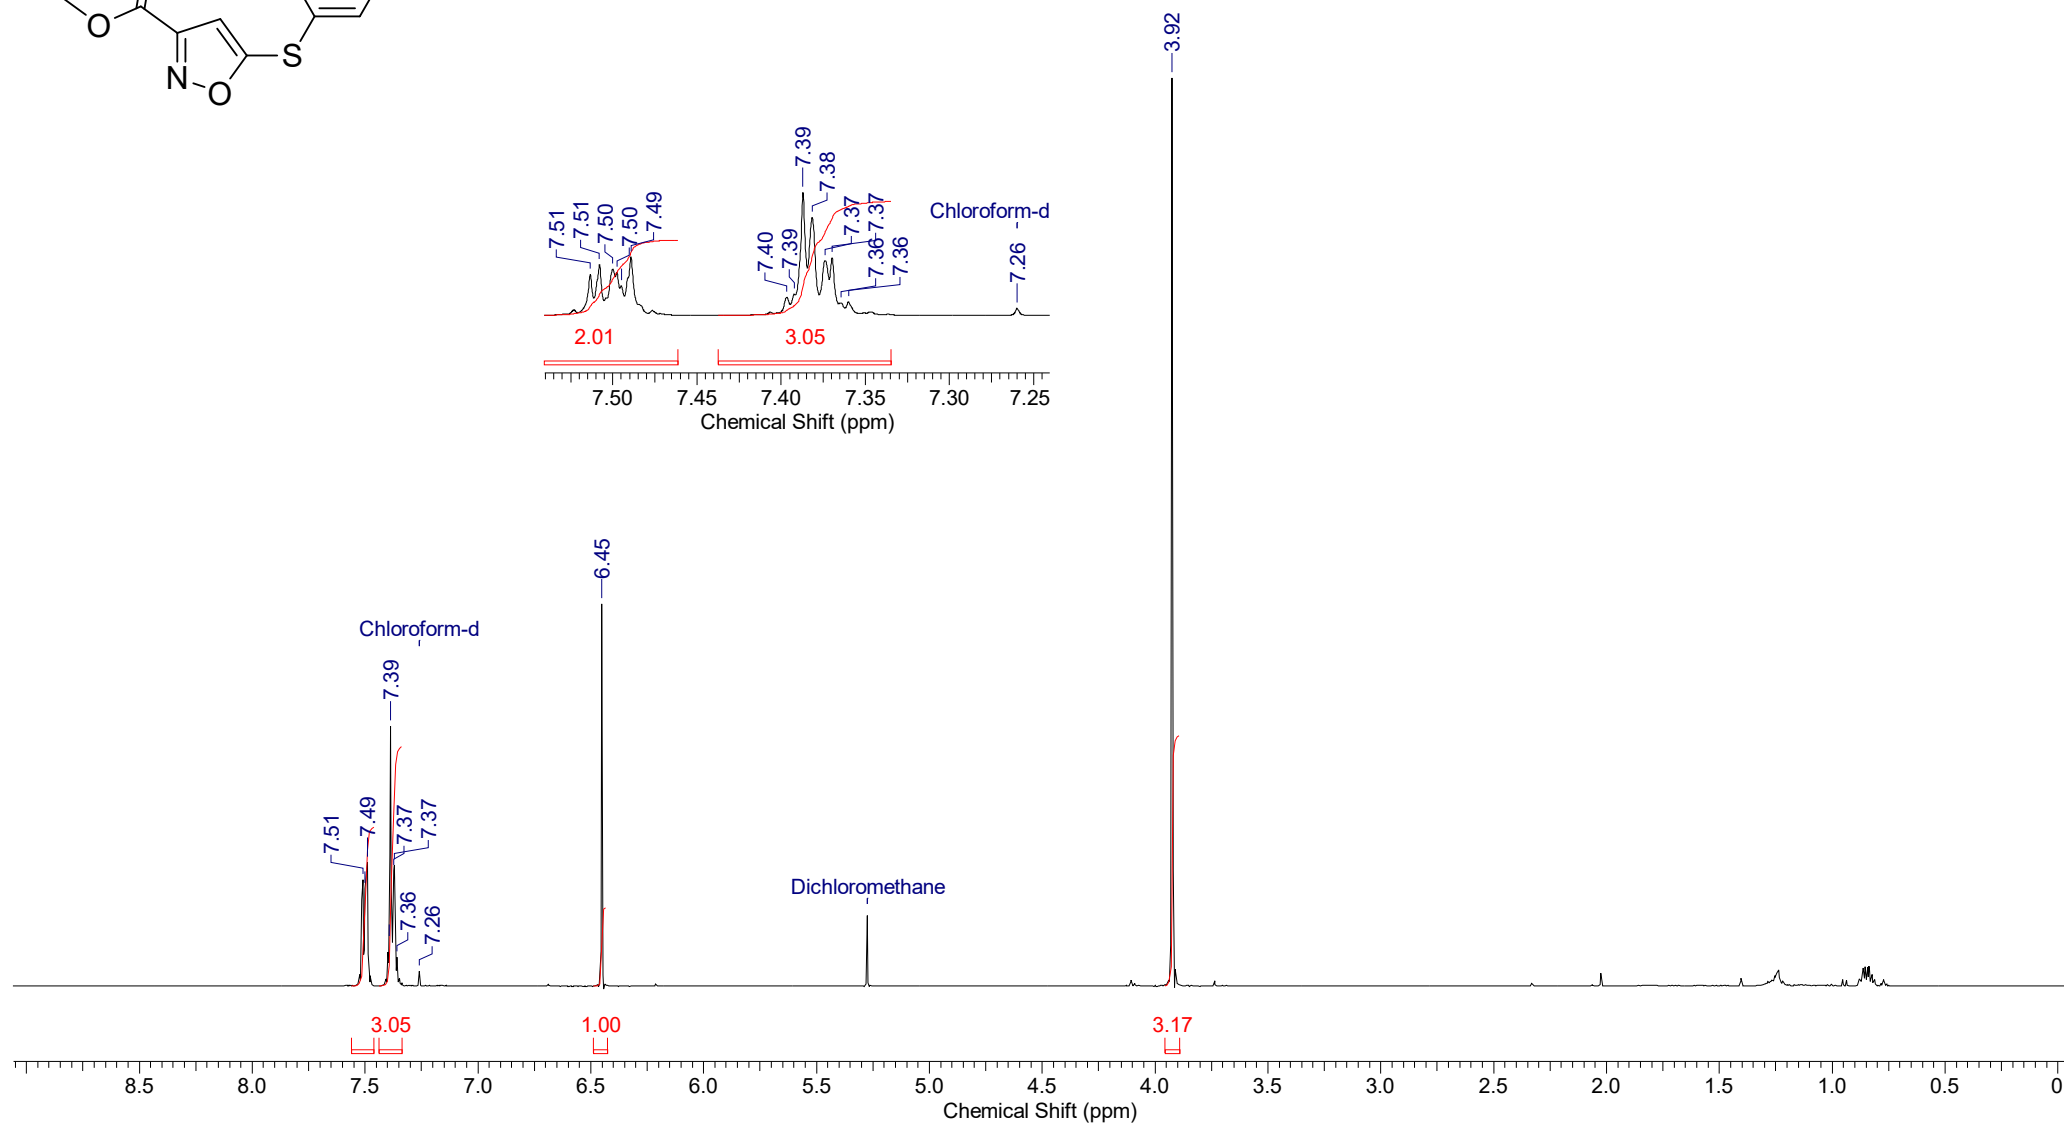

# Methyl 5-(phenylsulfanyl)isoxazole-3-carboxylate **2t** ( $^{13}\text{C}$ NMR)

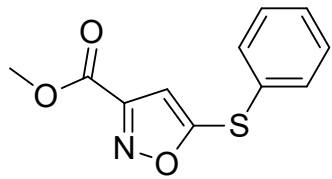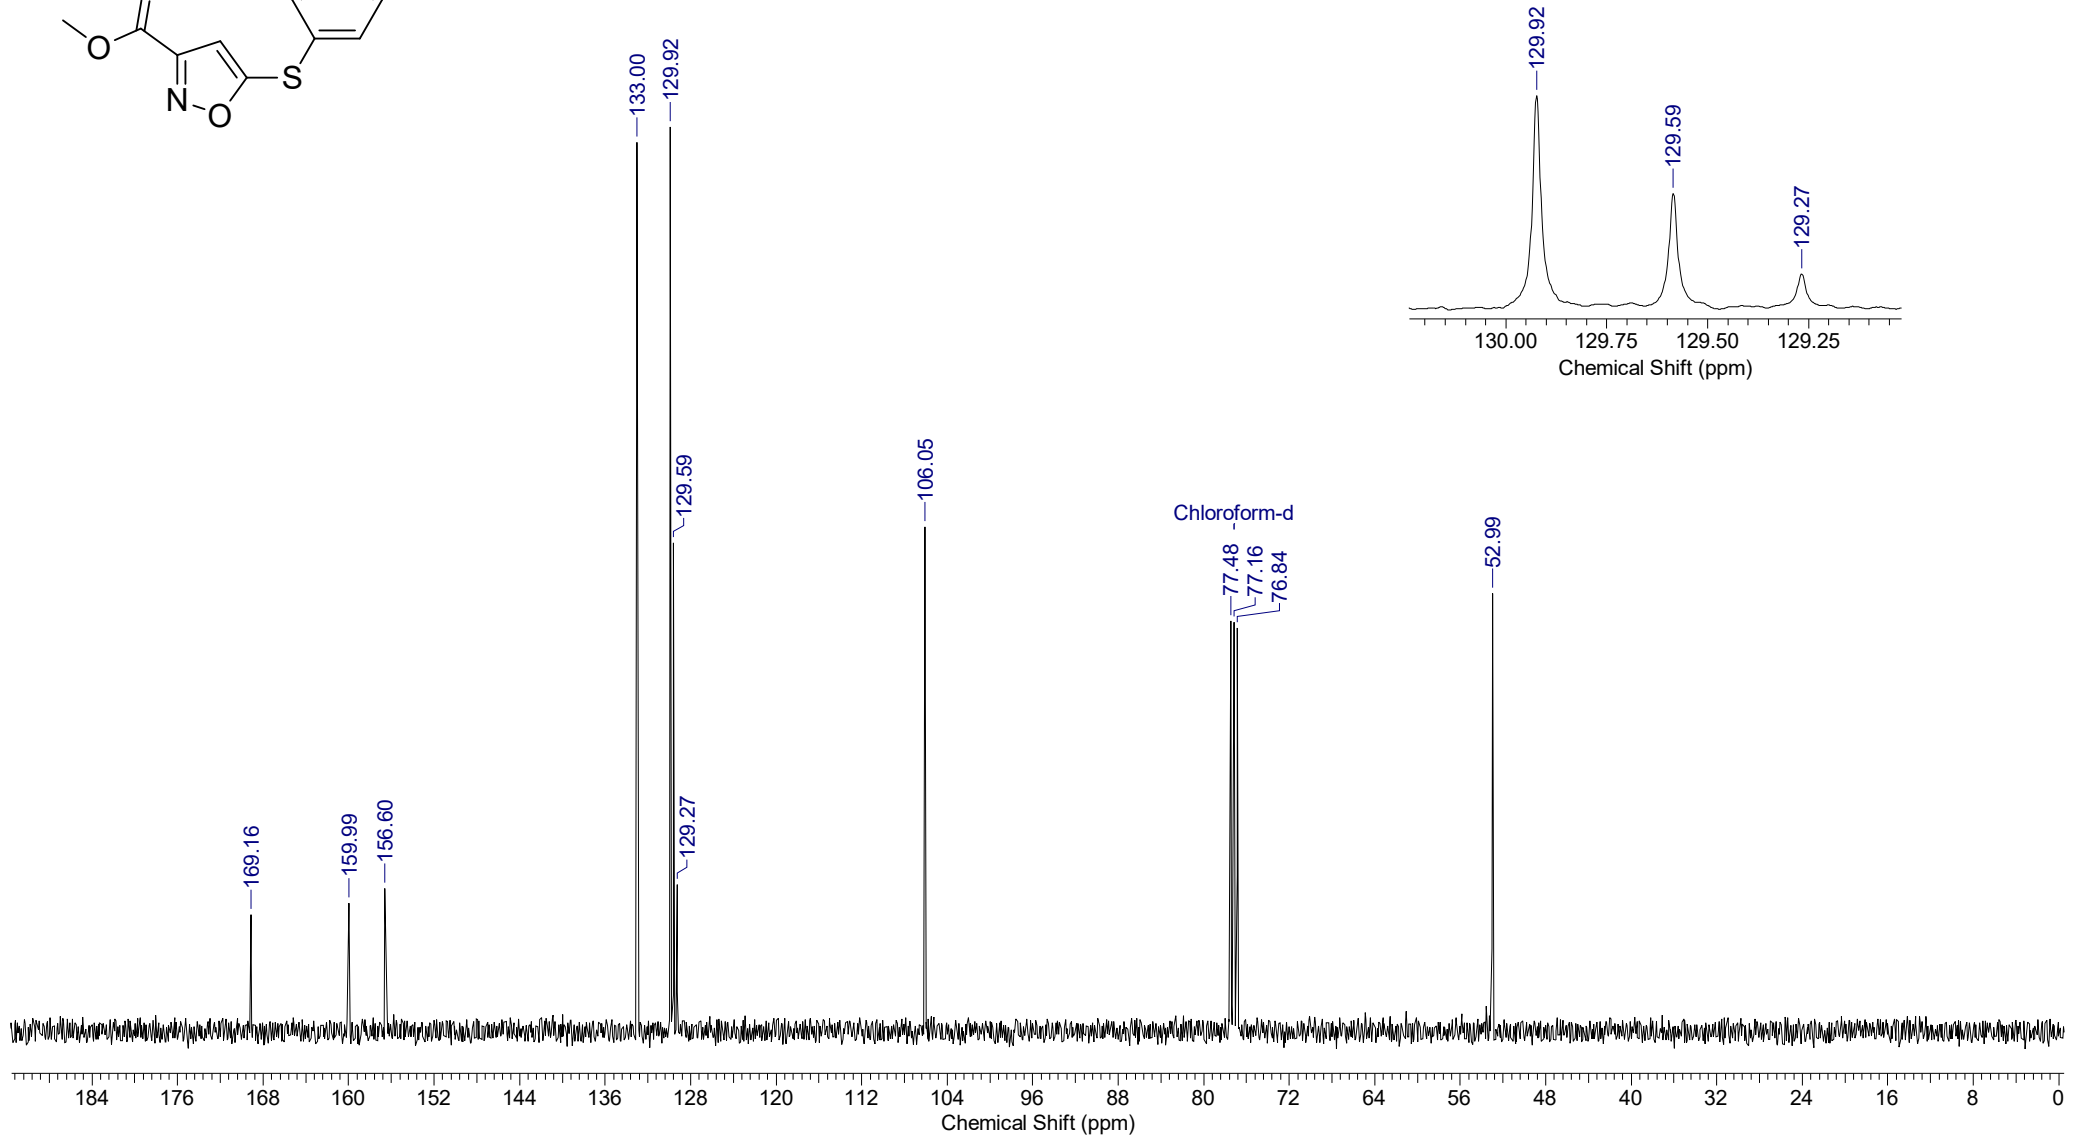

# 1-(5-Morpholinoisoxazol-3-yl)ethanone **2u** ( $^1\text{H}$ NMR)

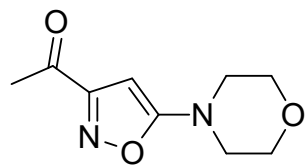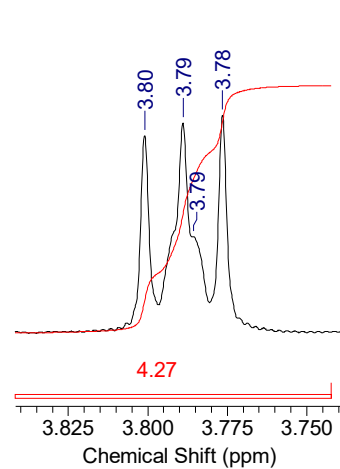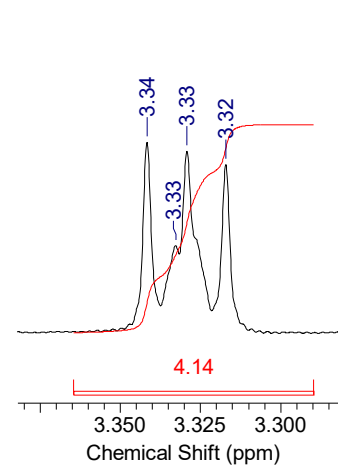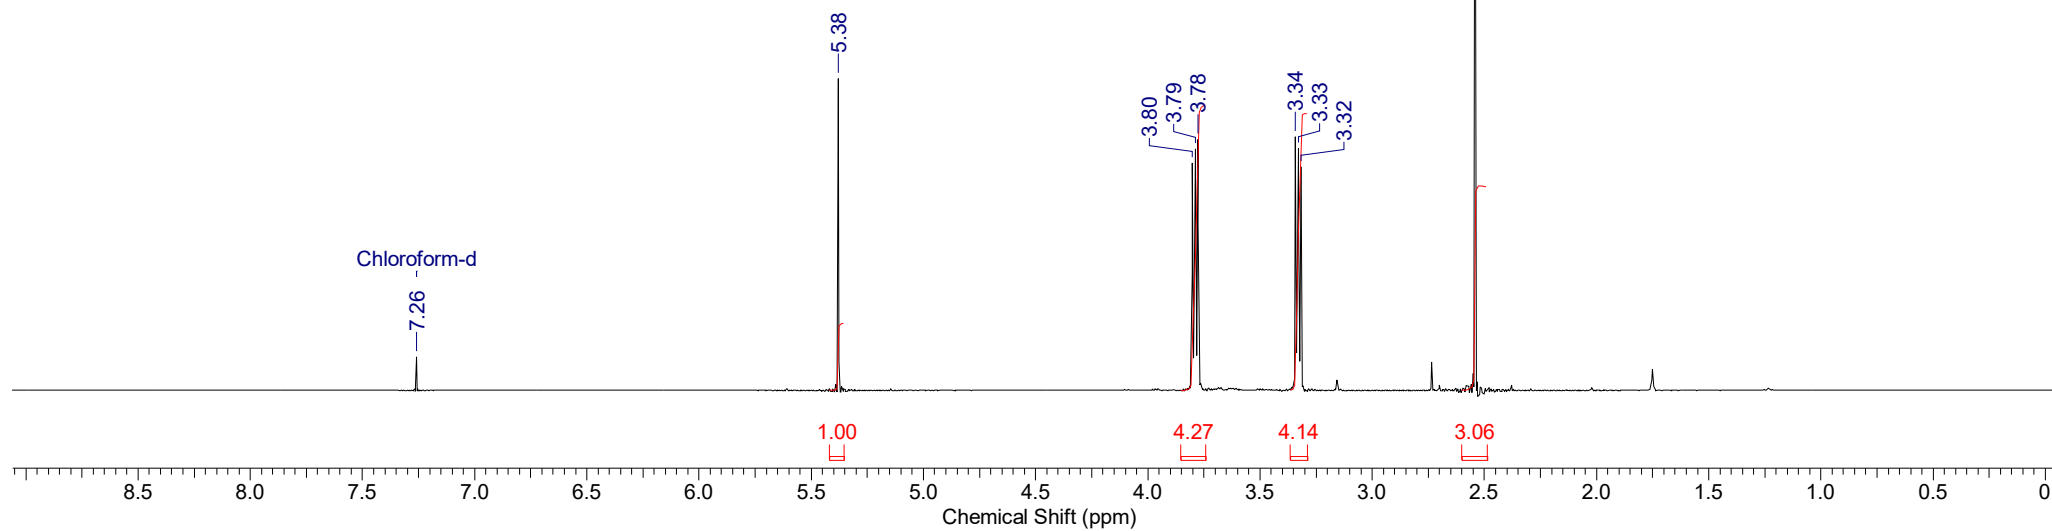

# 1-(5-Morpholinoisoxazol-3-yl)ethanone **2u** ( $^{13}\text{C}$ NMR)

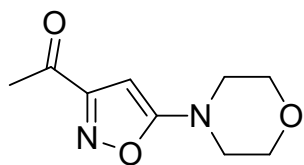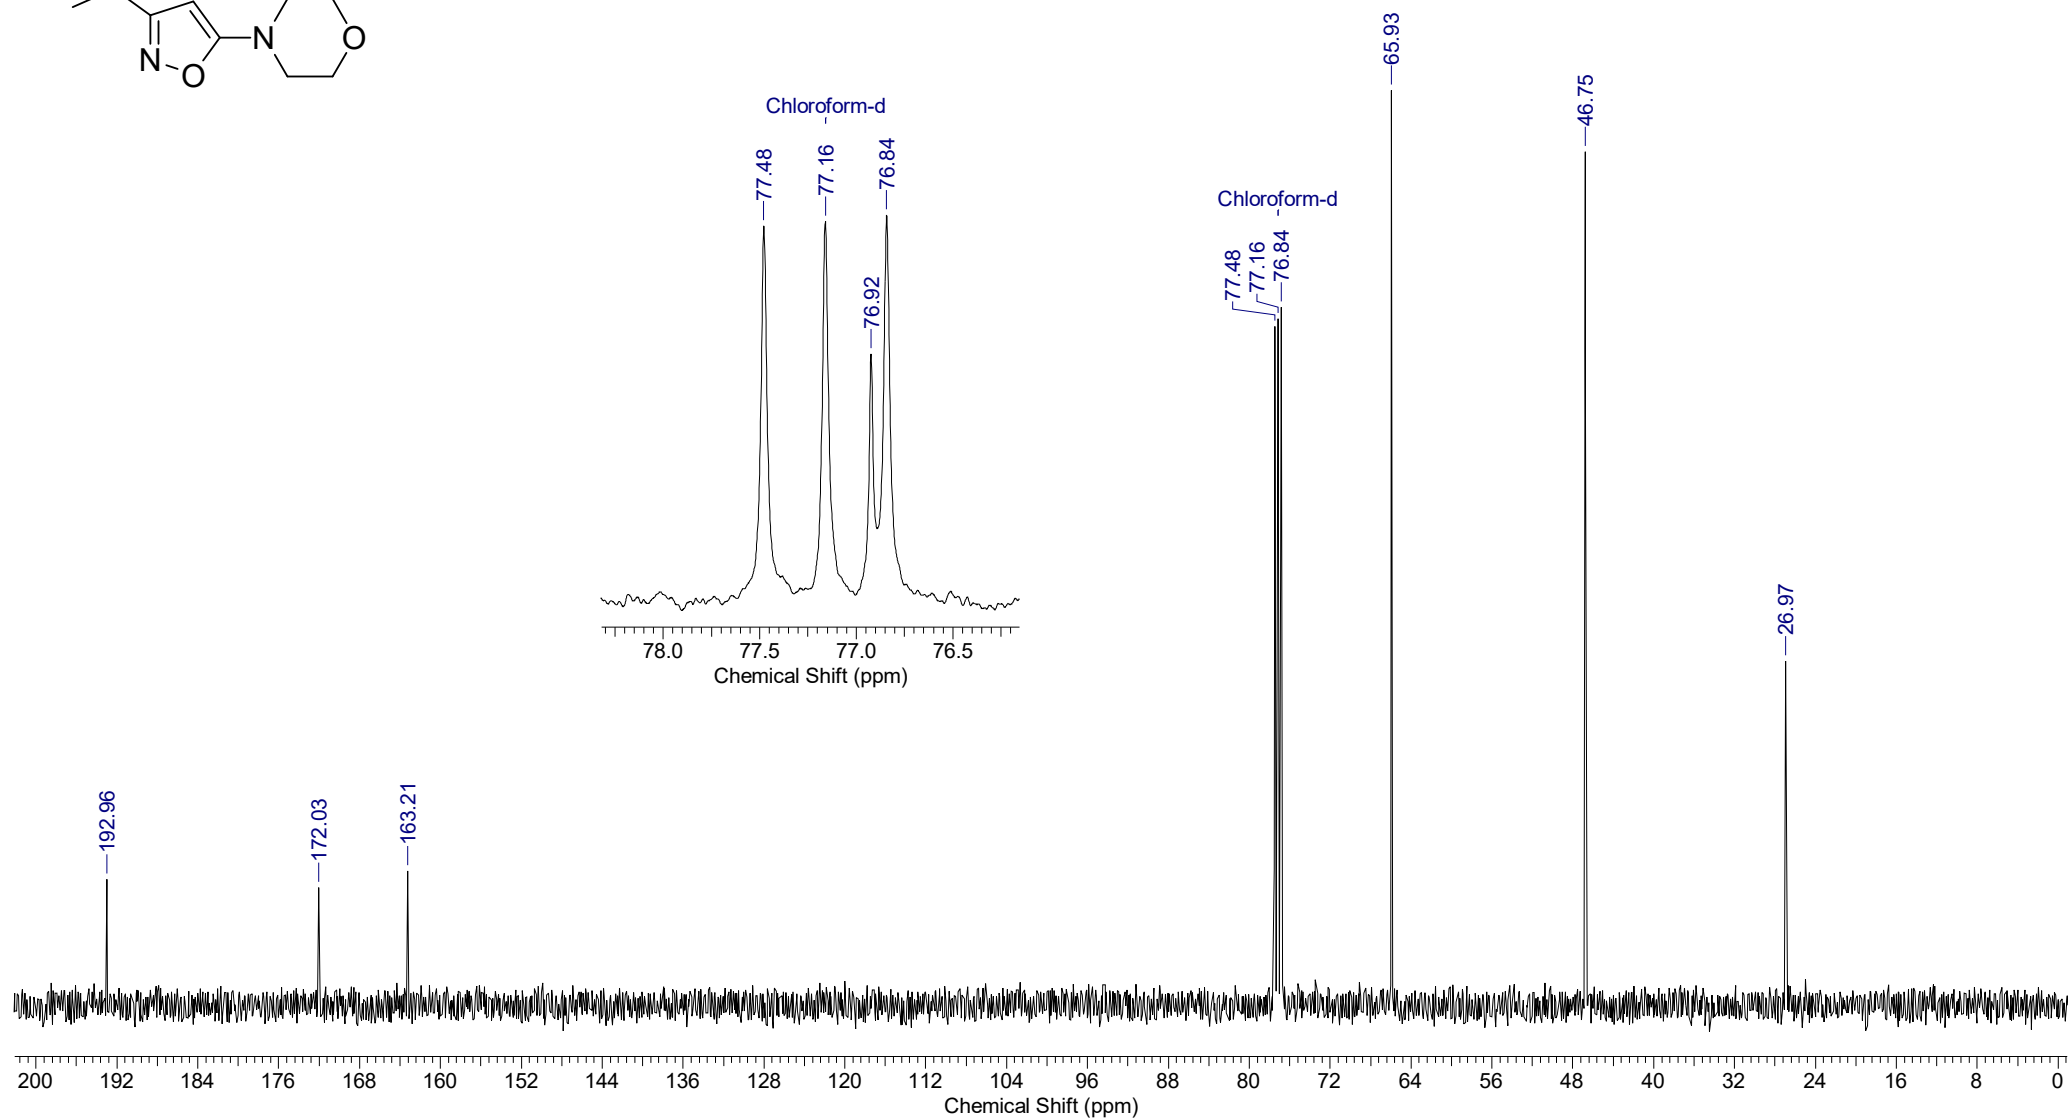

# 1-(5-(Phenylsulfanyl)isoxazol-3-yl)ethanone **2w** (<sup>1</sup>H NMR)

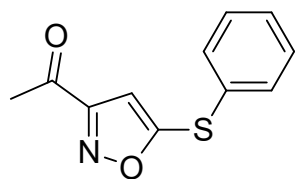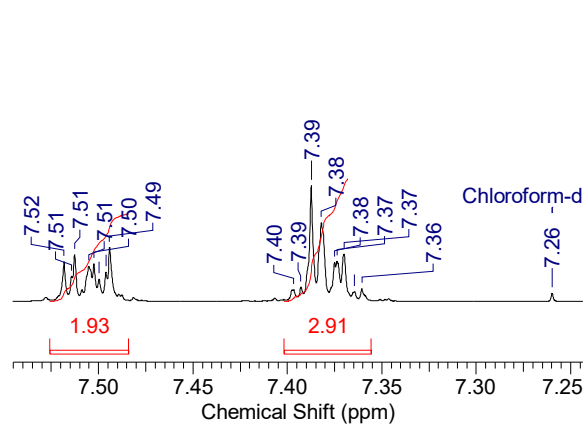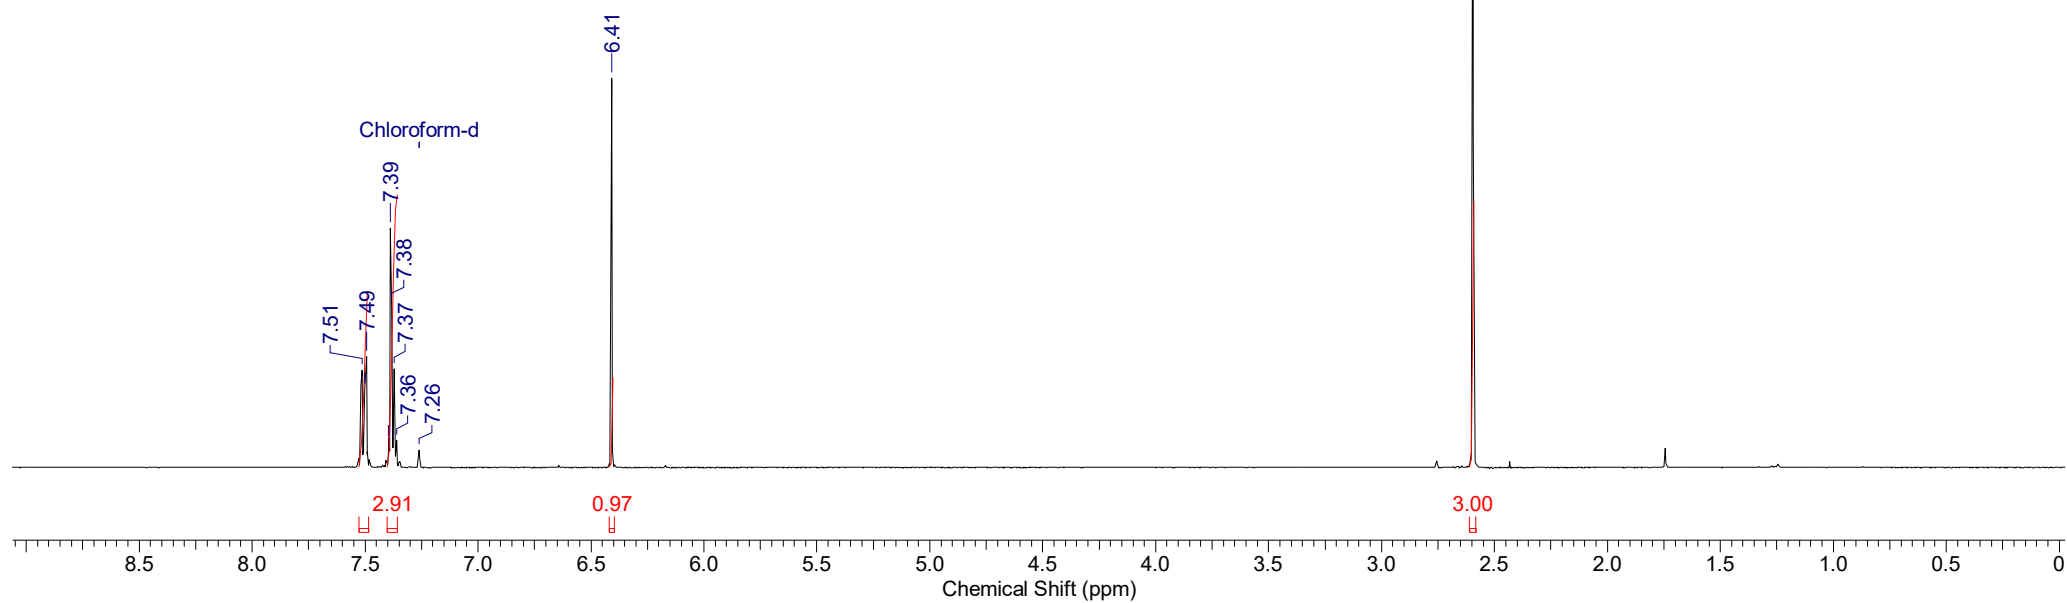

# 1-(5-(Phenylsulfanyl)isoxazol-3-yl)ethanone **2w** ( $^{13}\text{C}$ NMR)

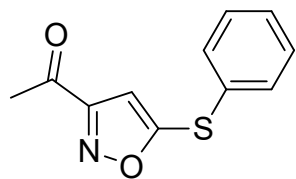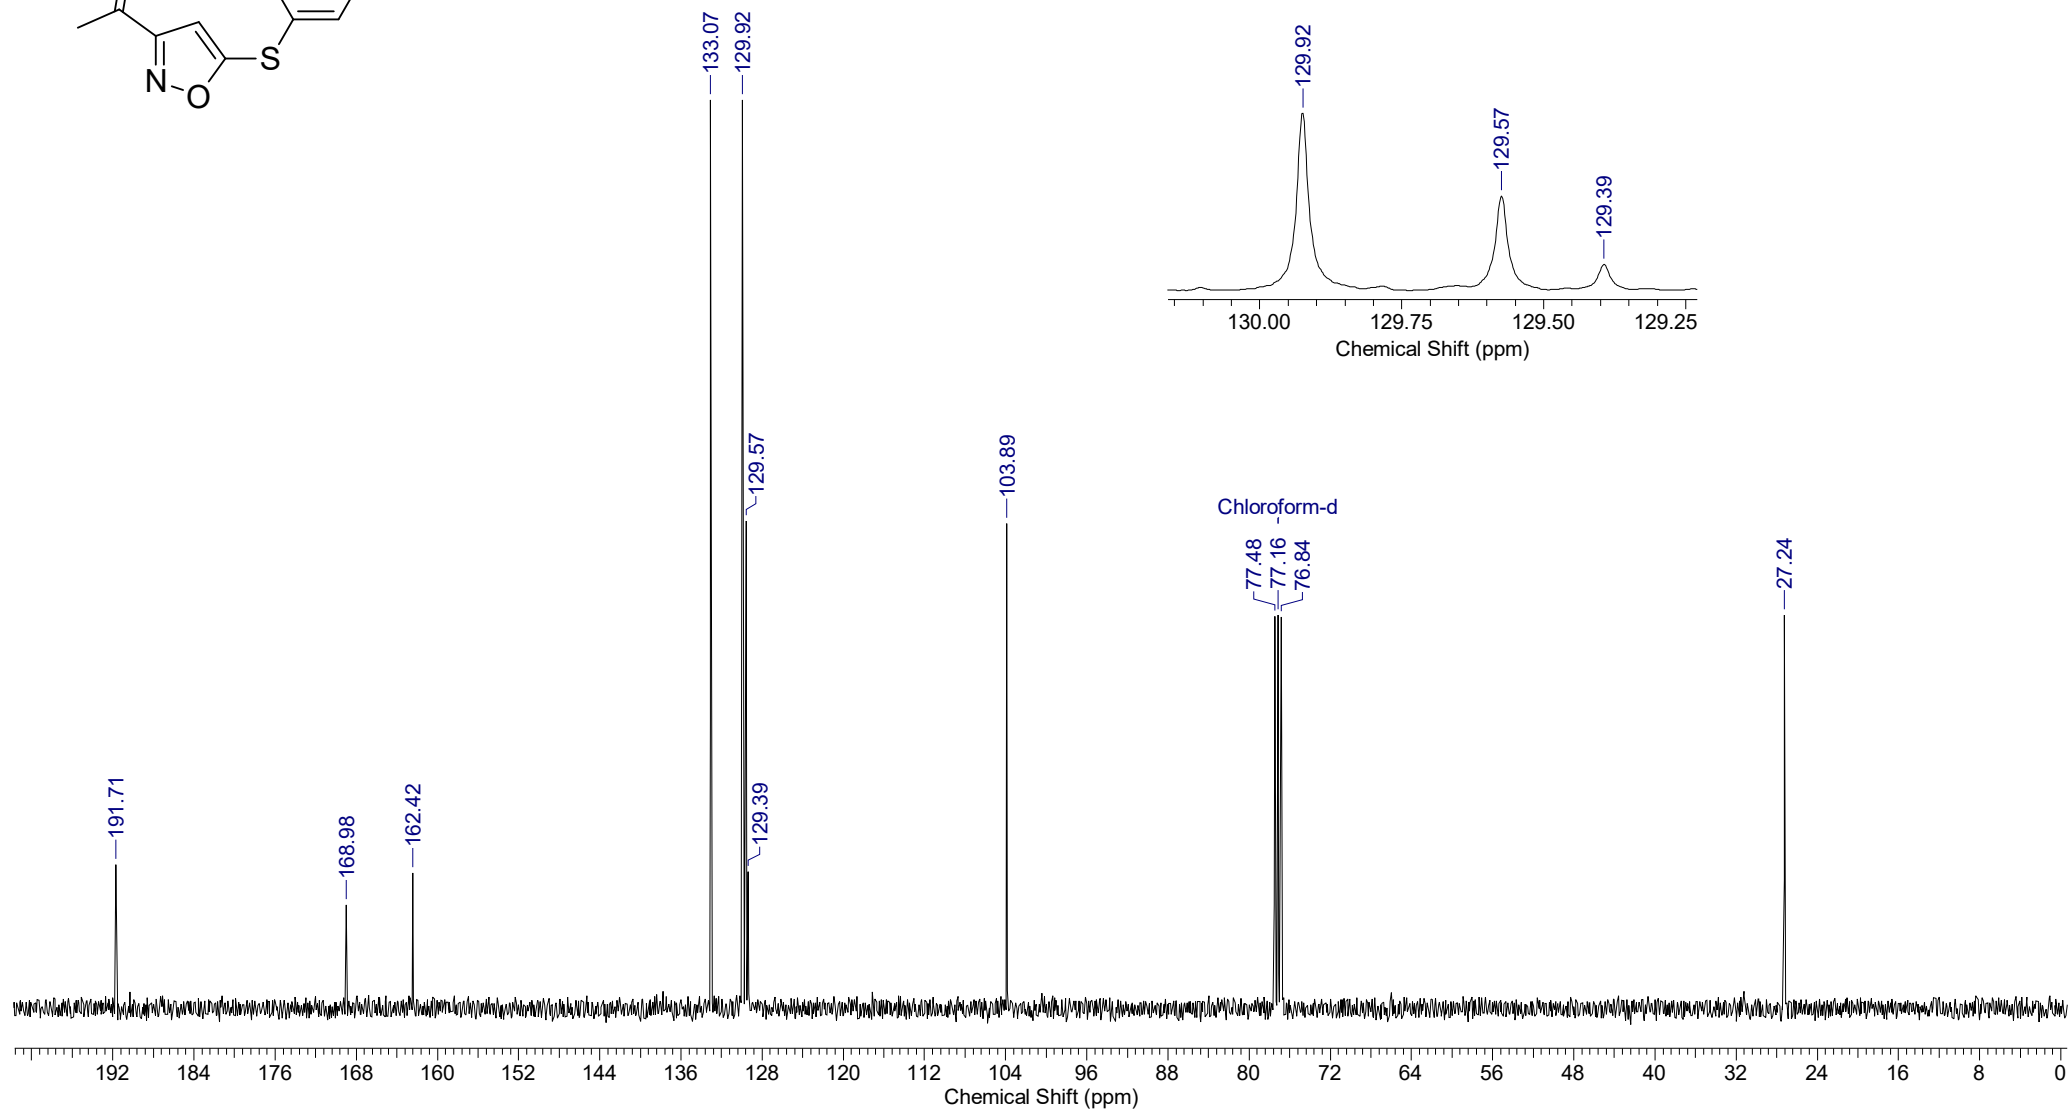

# (5-Morpholinoisoxazol-3-yl)(phenyl)methanone **2x** (<sup>1</sup>H NMR)

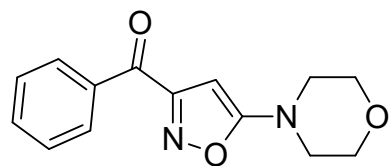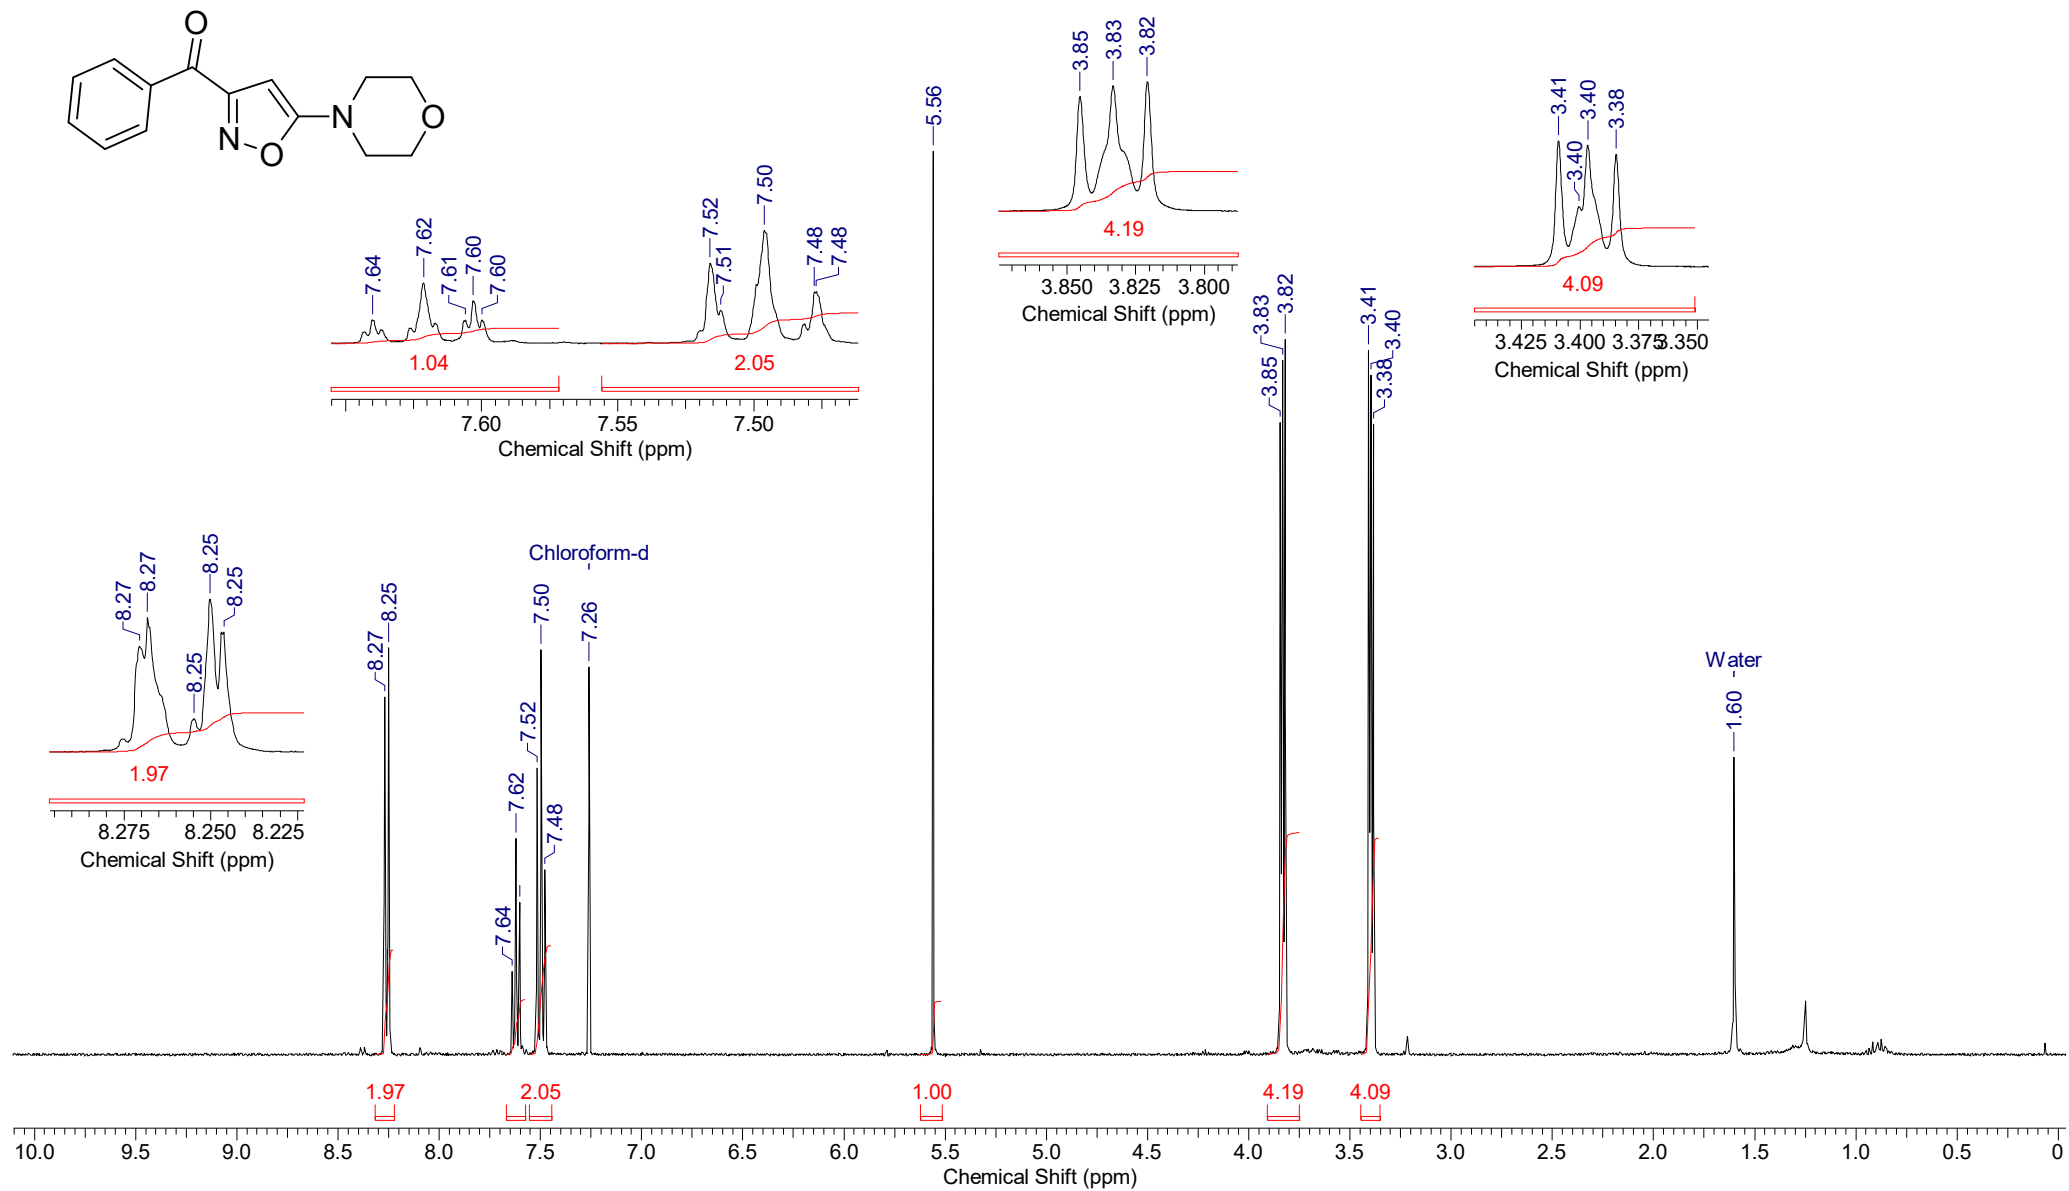



(5-Morpholinoisoxazol-3-yl)(phenyl)methanone **2x** ( $^{13}\text{C}$  NMR)

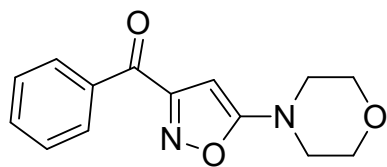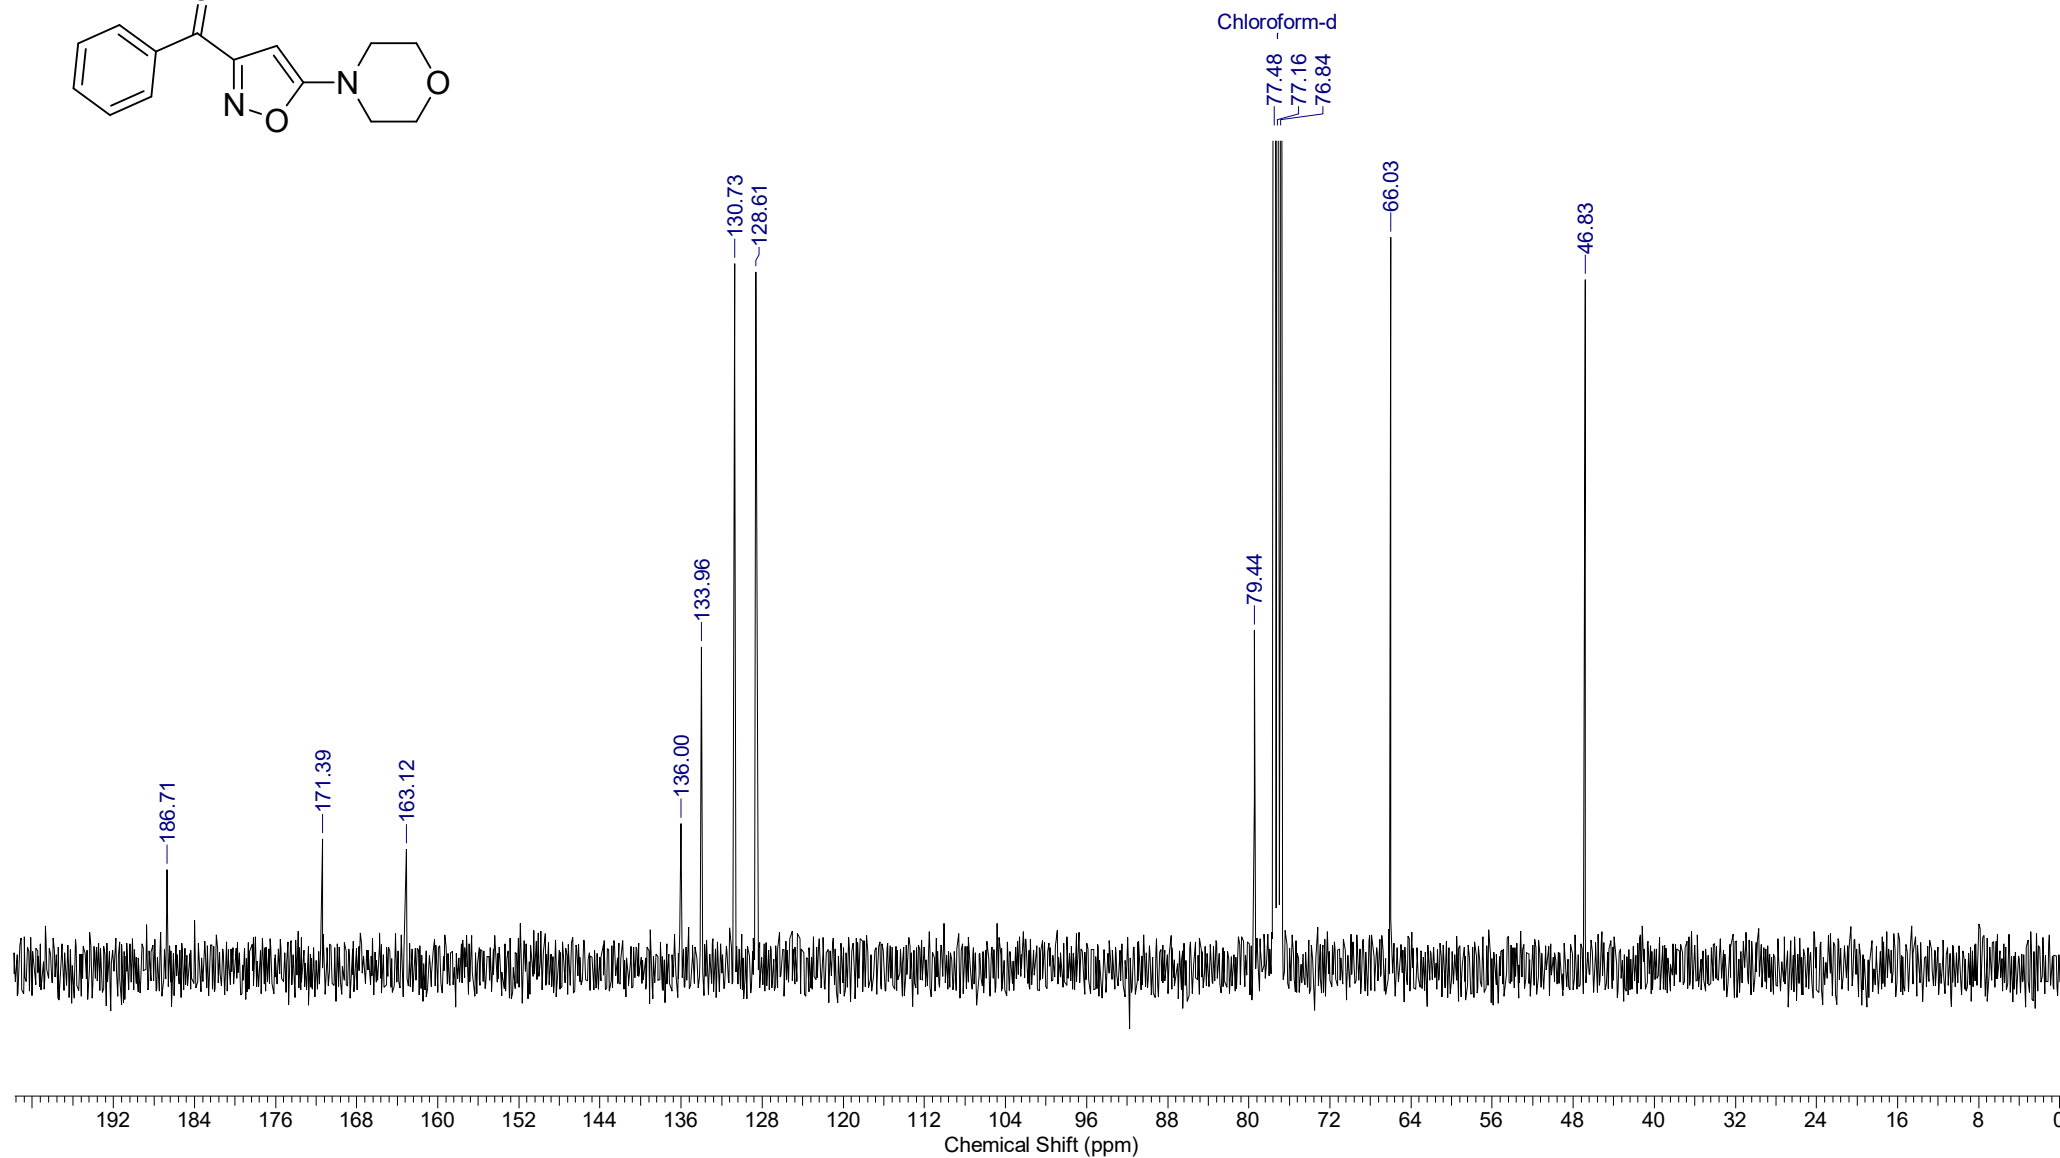

# 5-Morpholinoisoxazole-3-carboxamide **2y** ( $^1\text{H}$ NMR)

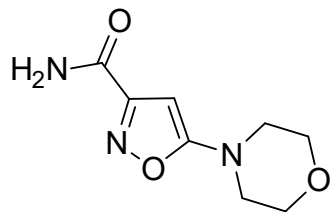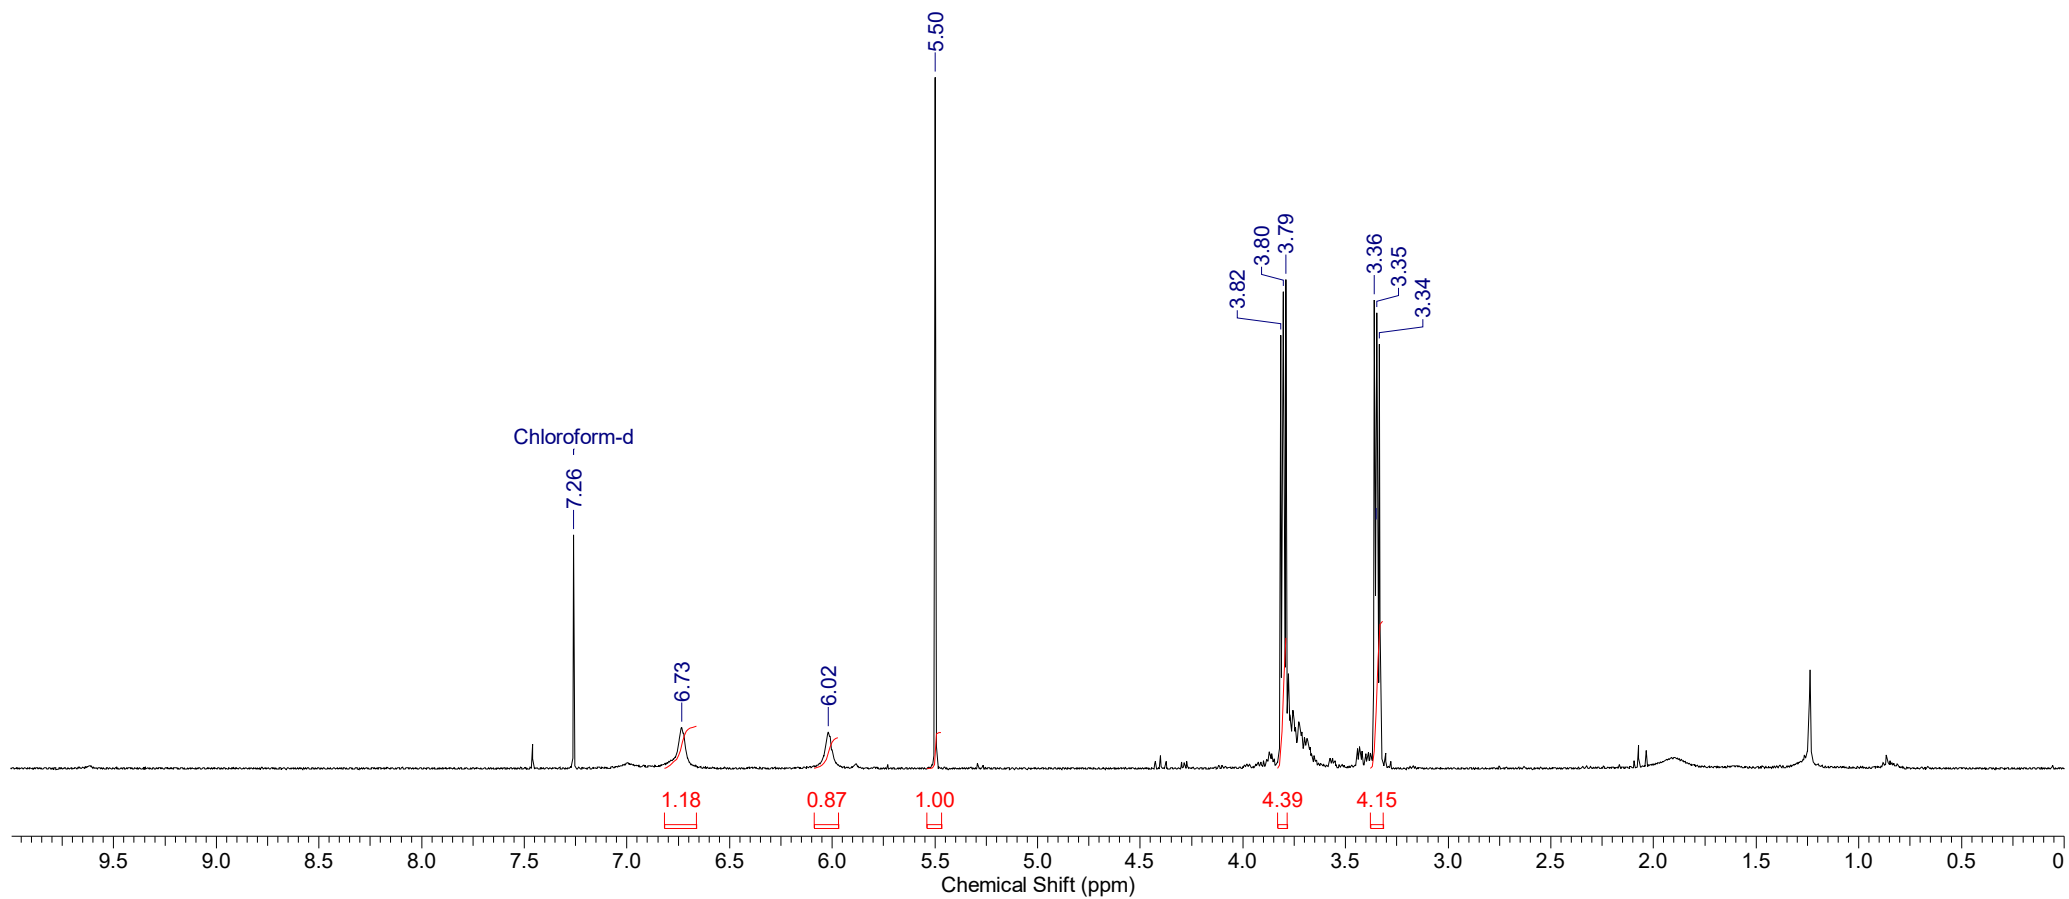

# 5-Morpholinoisoxazole-3-carboxamide **2y** ( $^{13}\text{C}$ NMR)

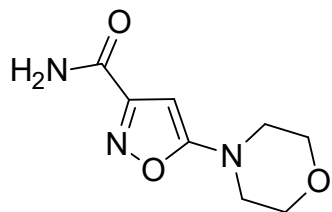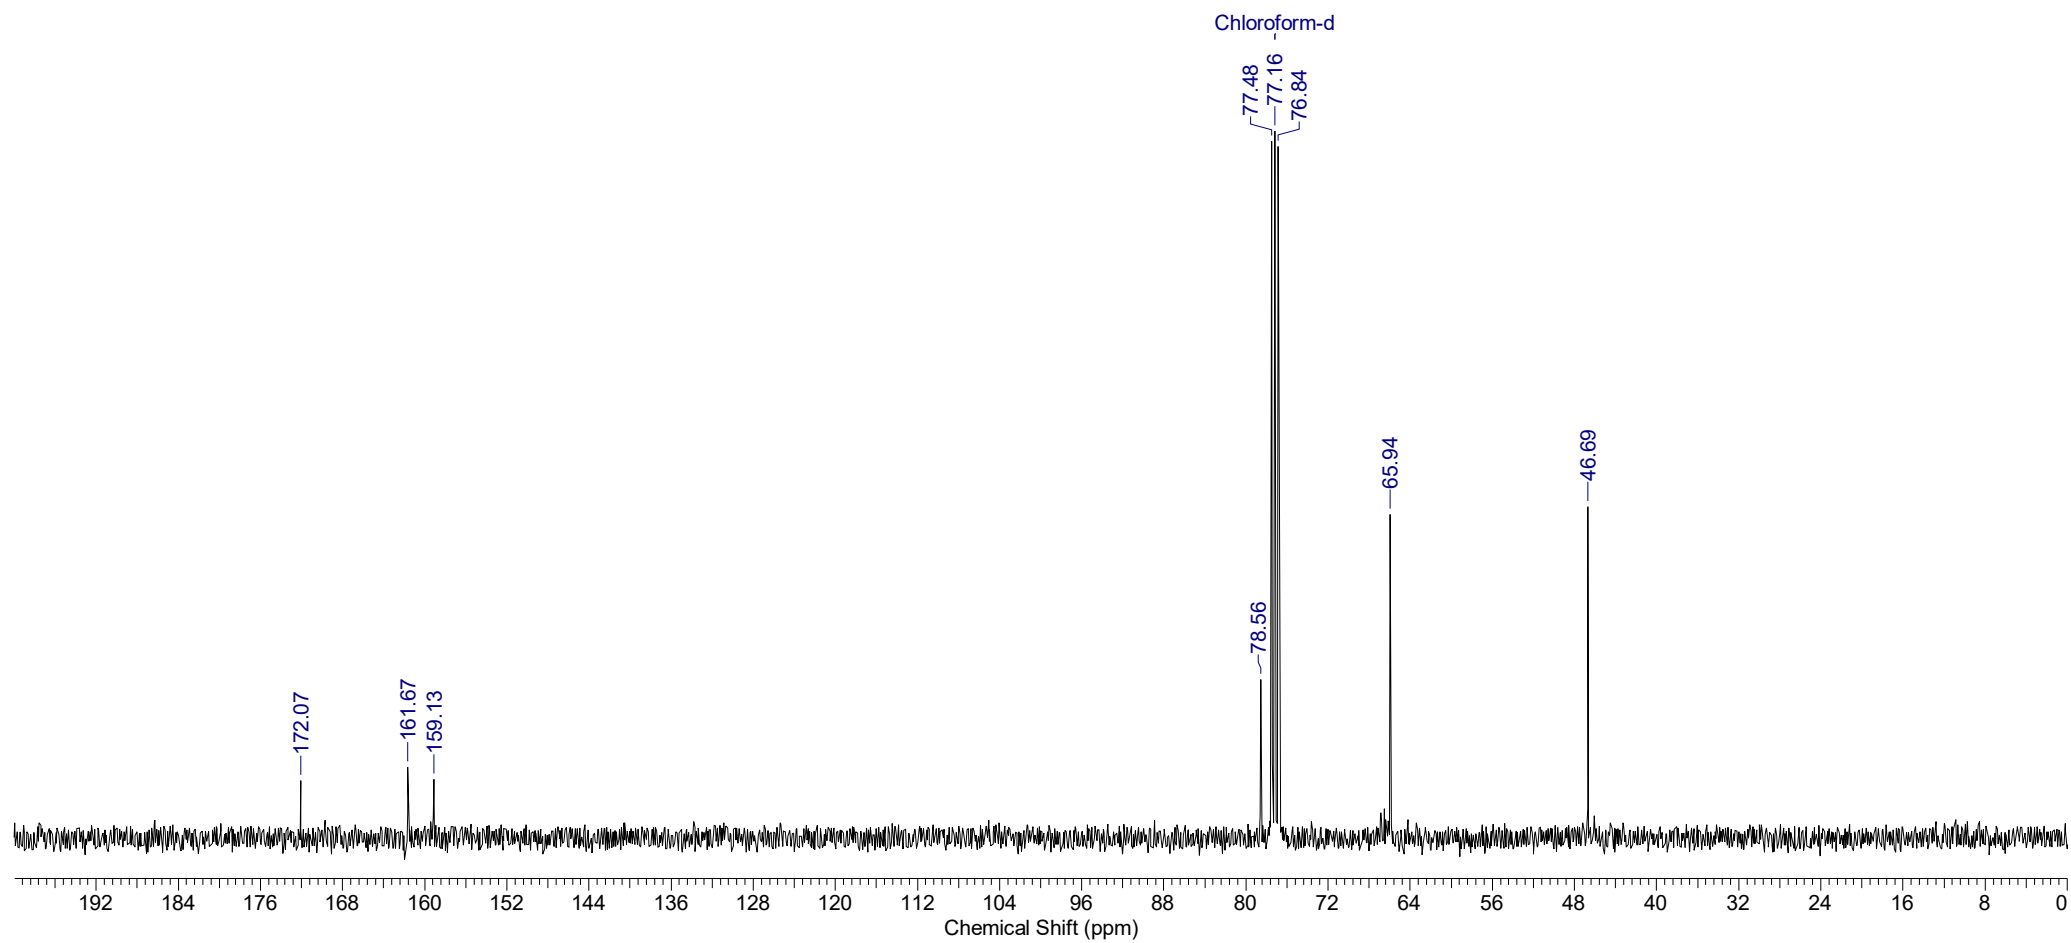

# Diethyl (5-morpholinoisoxazol-3-yl)phosphonate **2z** ( $^1\text{H}$ NMR)

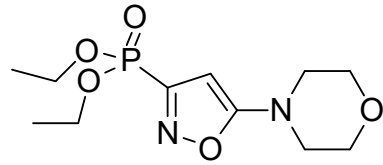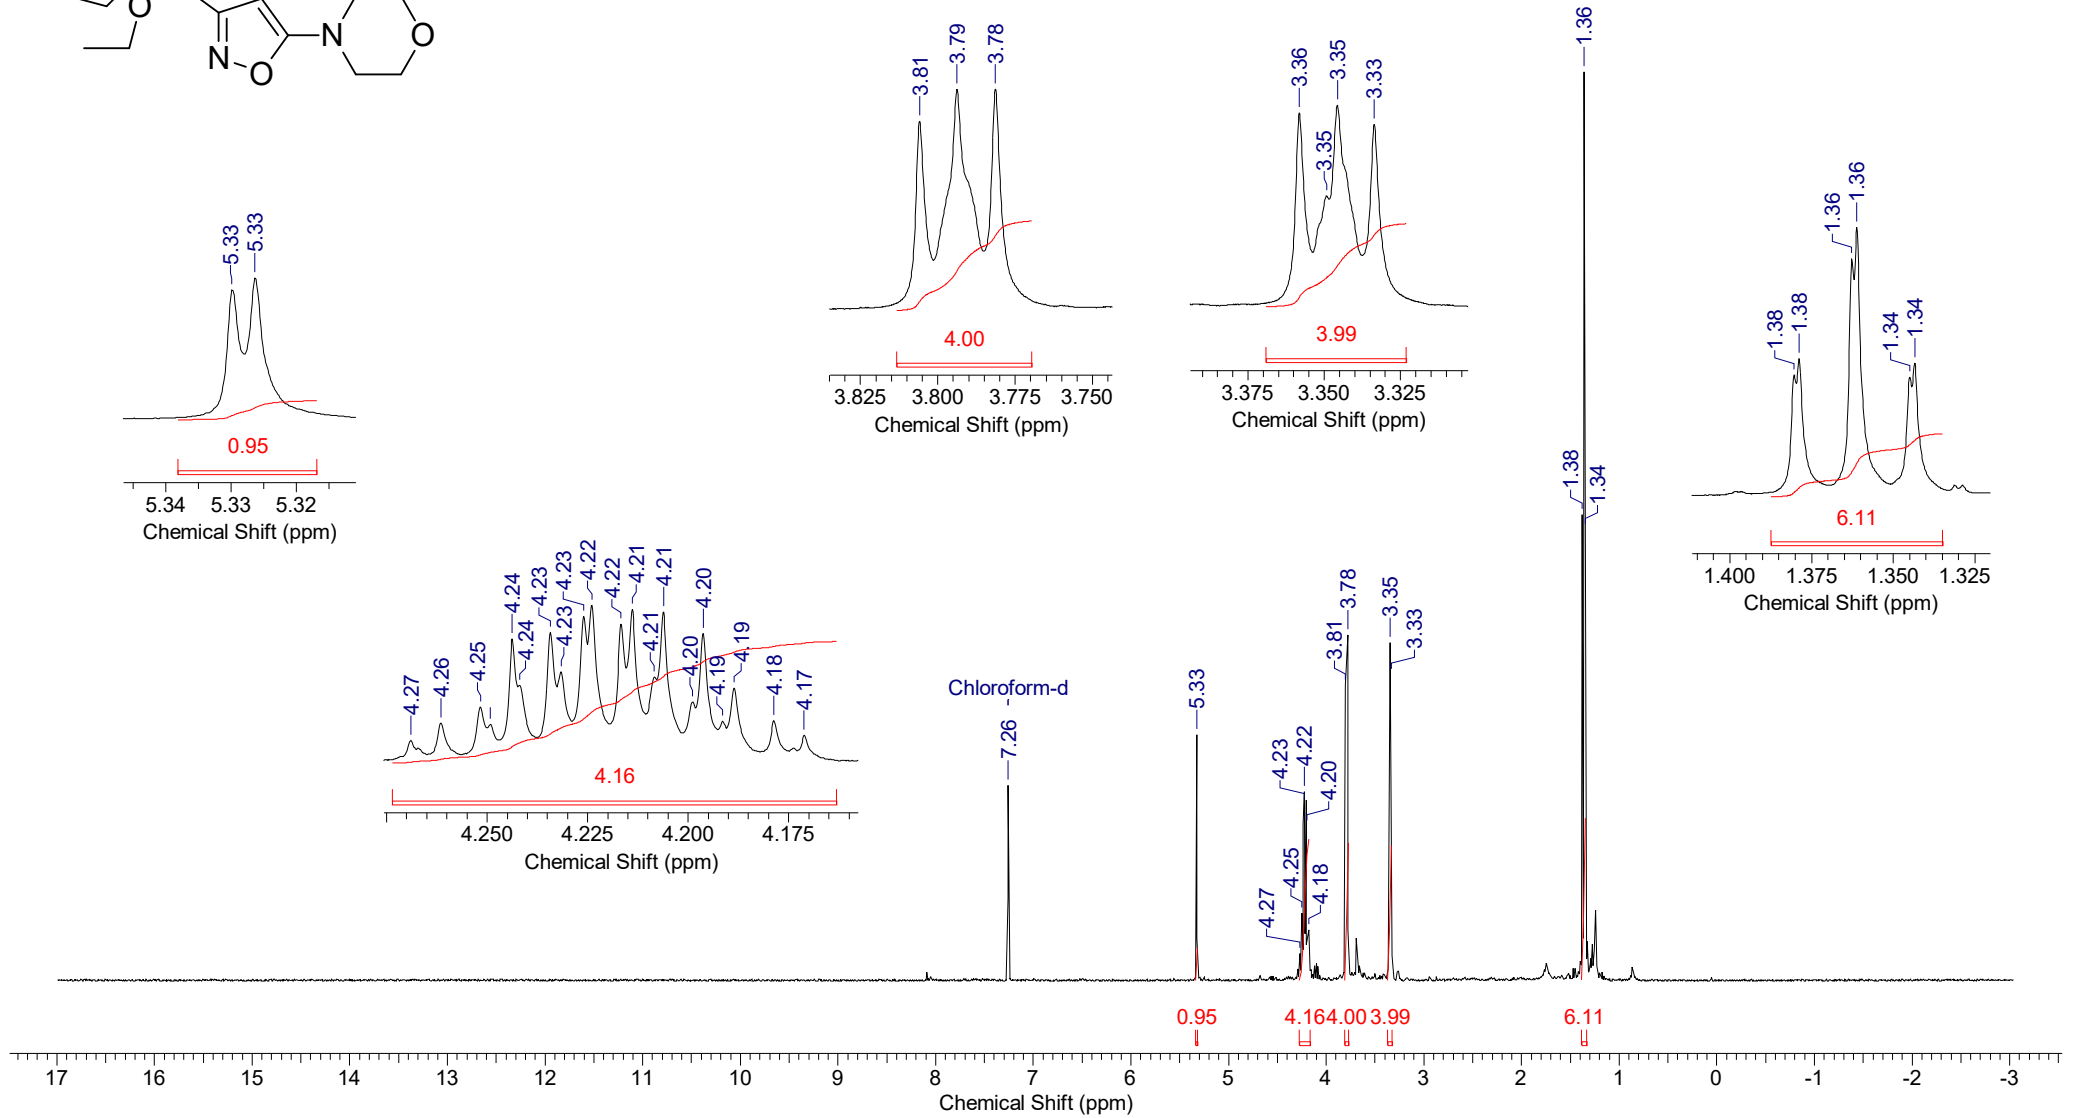

# Diethyl (5-morpholinoisoxazol-3-yl)phosphonate **2z** ( $^{13}\text{C}$ NMR)

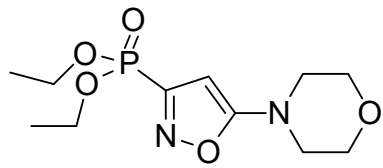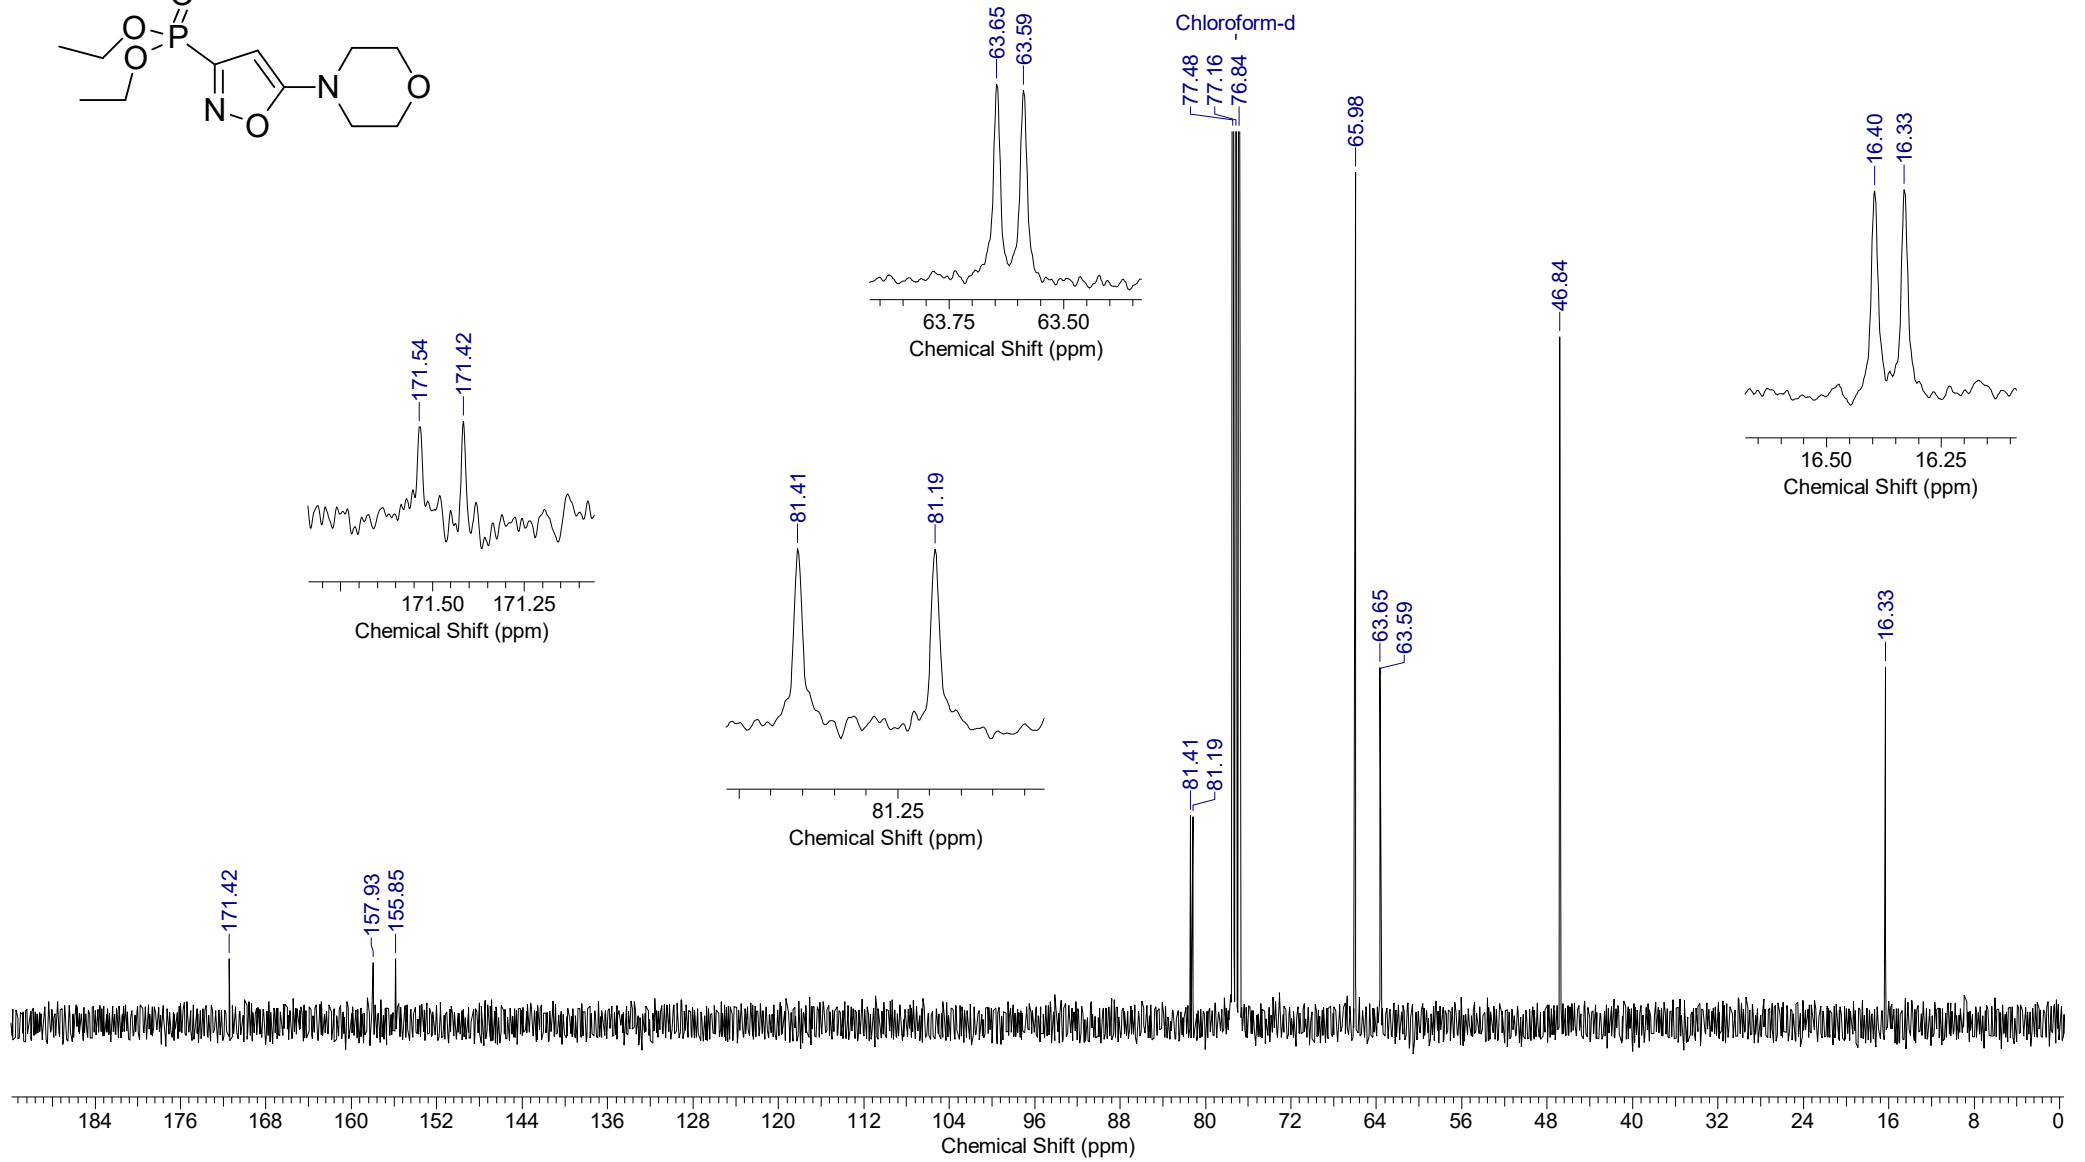

Diethyl (5-morpholinoisoxazol-3-yl)phosphonate **2z** ( $^{31}\text{P}$  NMR)

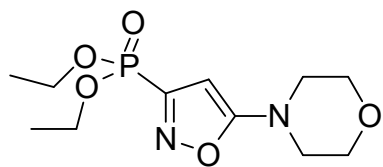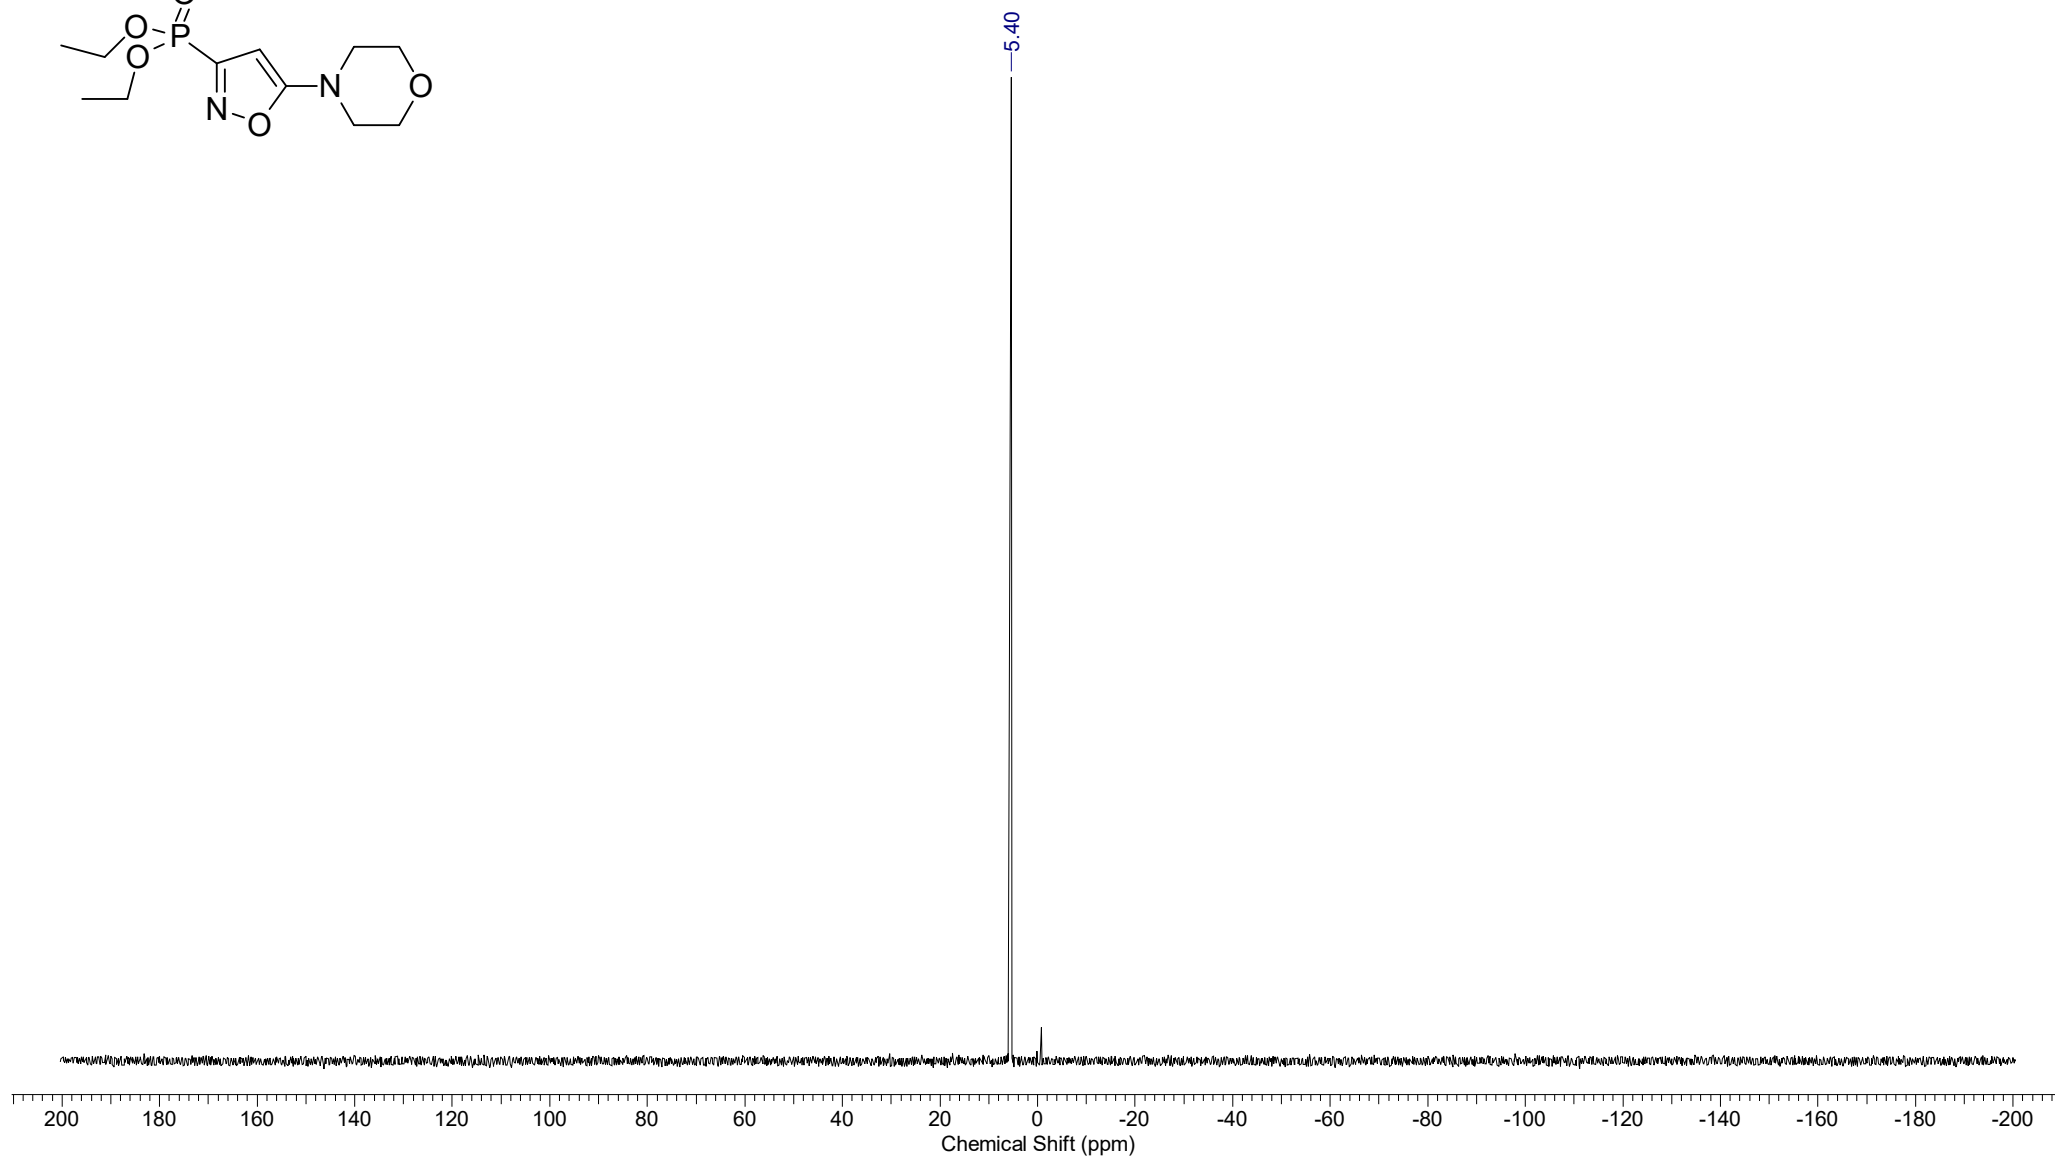

# Diethyl (5-phenoxyisoxazol-3-yl)phosphonate **2za** ( $^1\text{H}$ NMR)

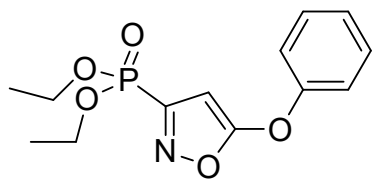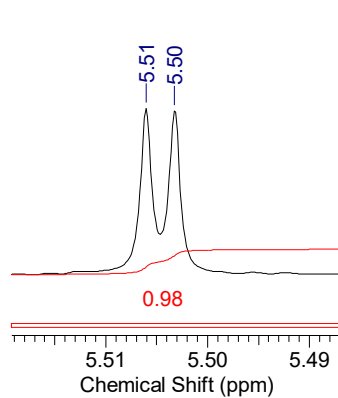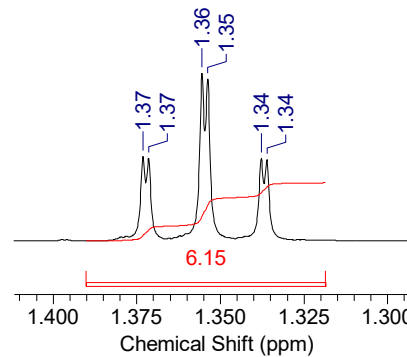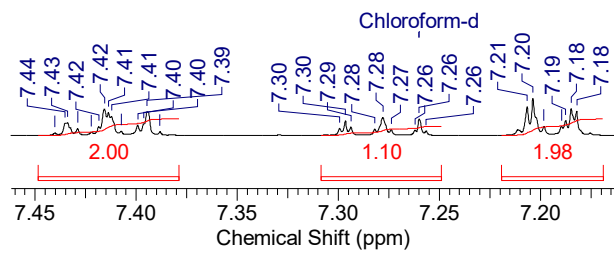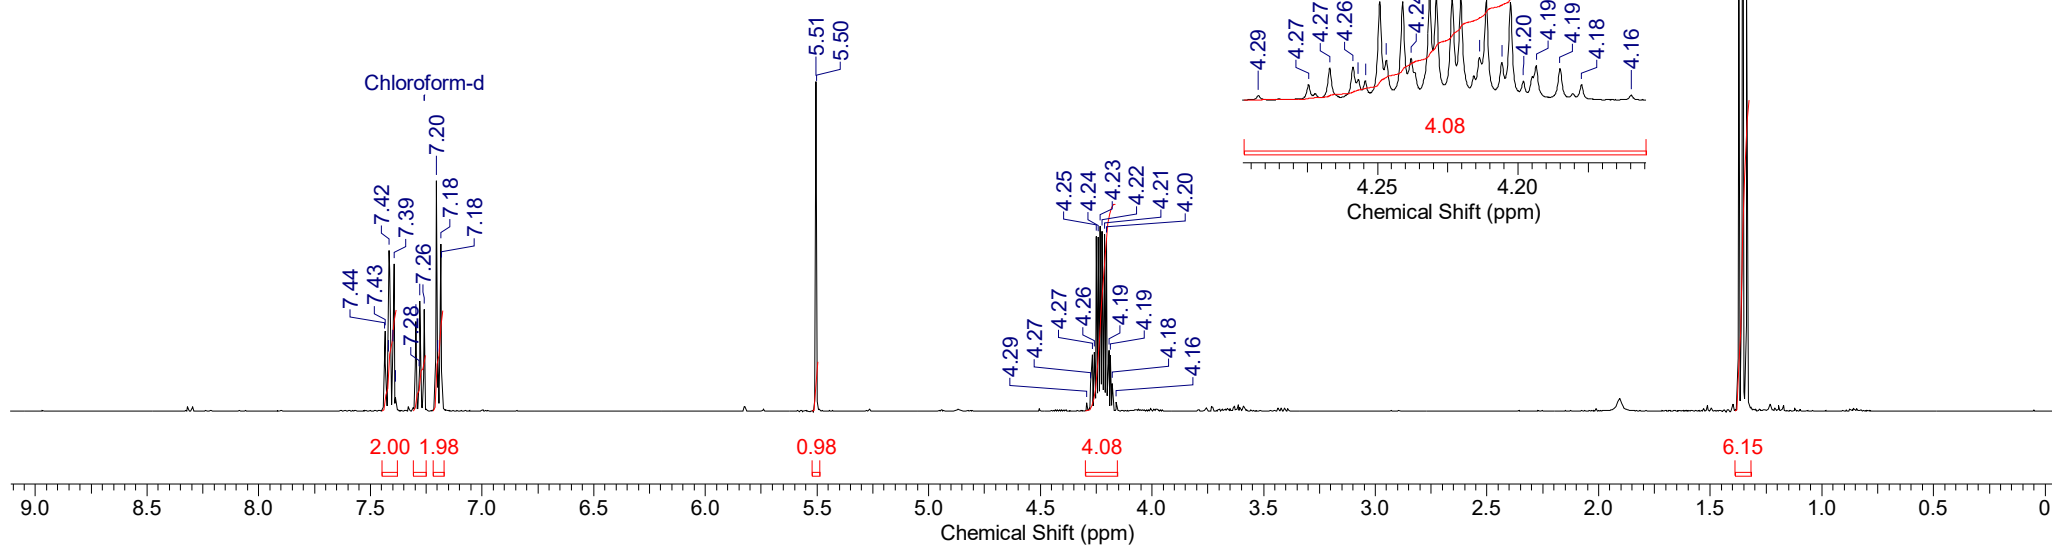

# Diethyl (5-phenoxyisoxazol-3-yl)phosphonate **2za** ( $^{13}\text{C}$ NMR)

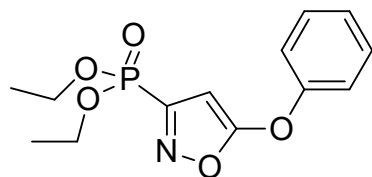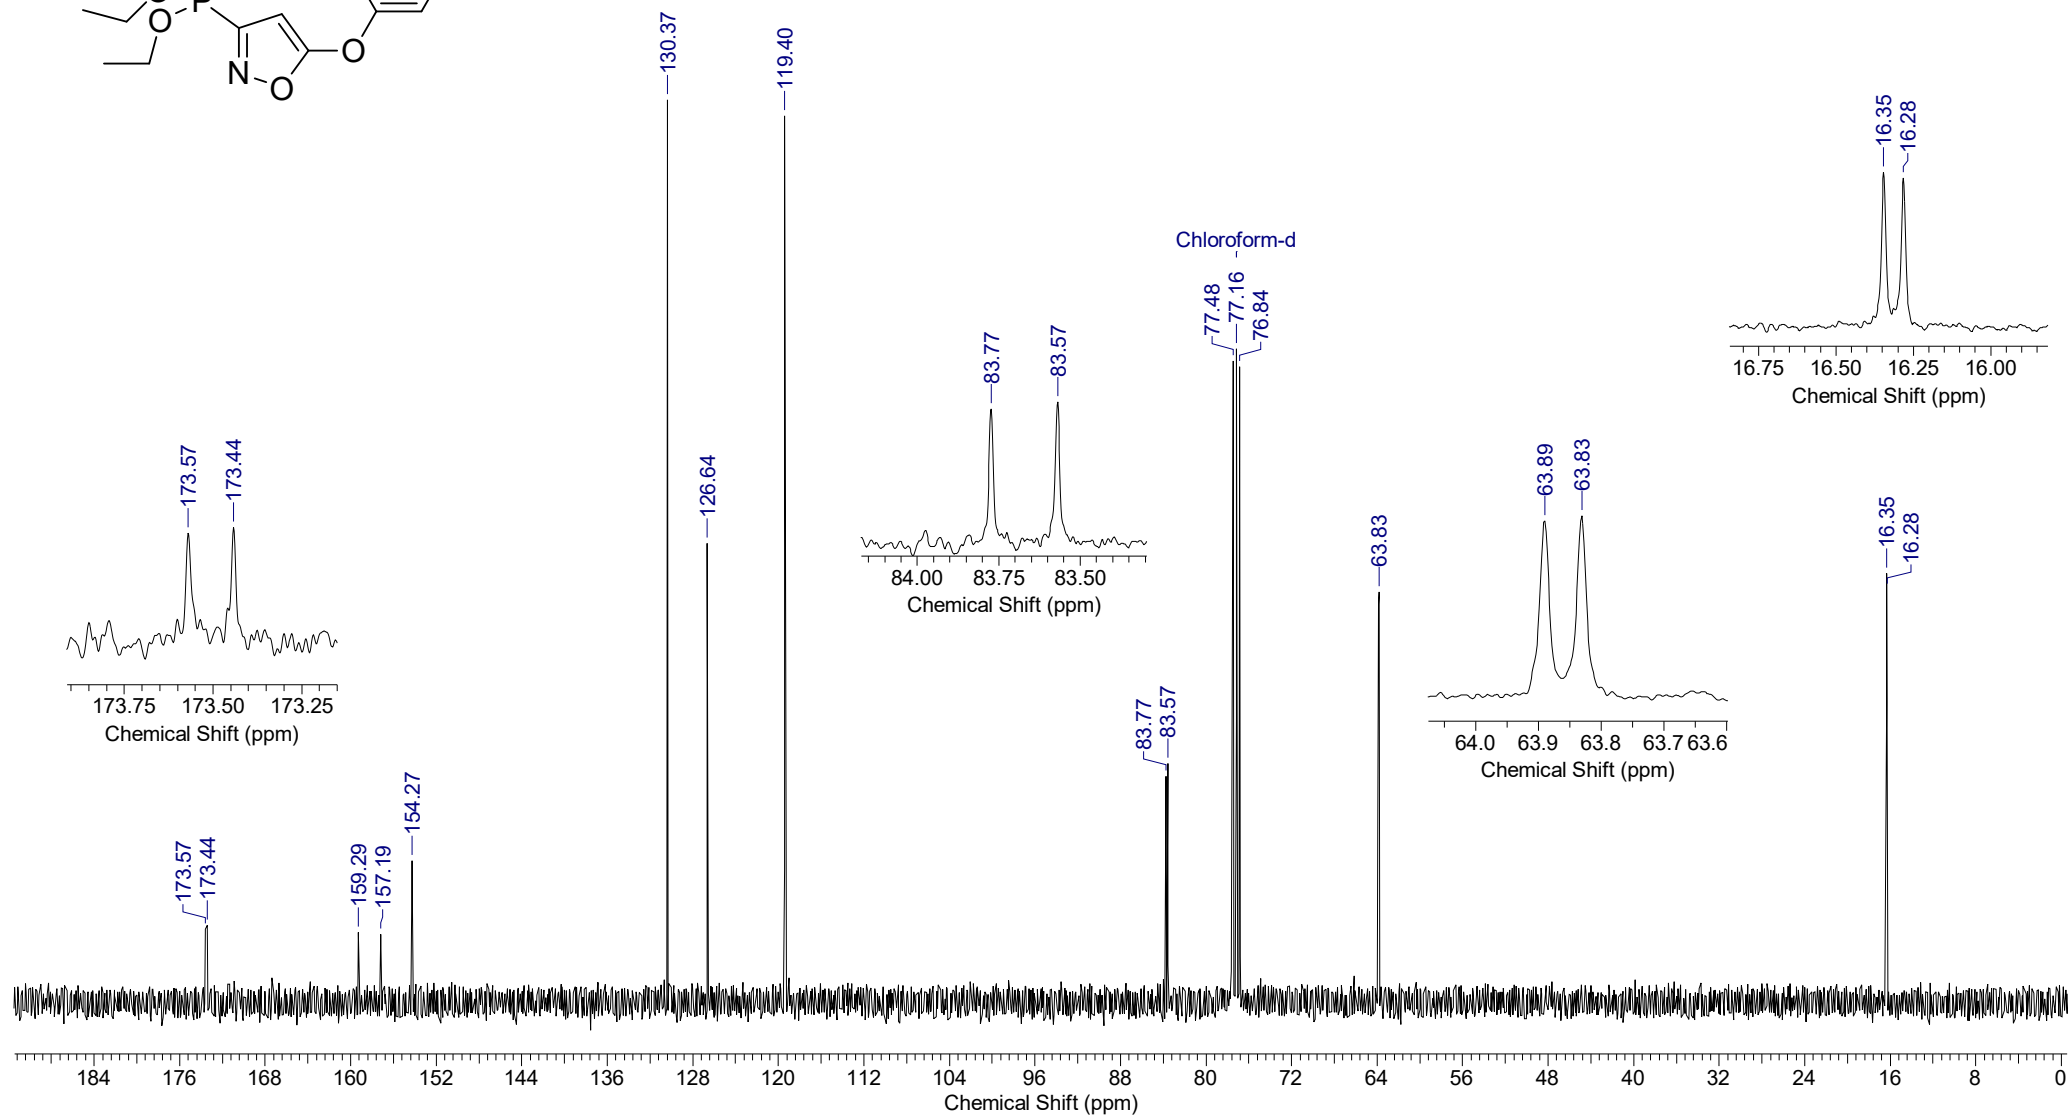



Diethyl (5-phenoxyisoxazol-3-yl)phosphonate **2za** ( $^{31}\text{P}$  NMR)

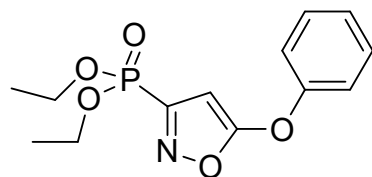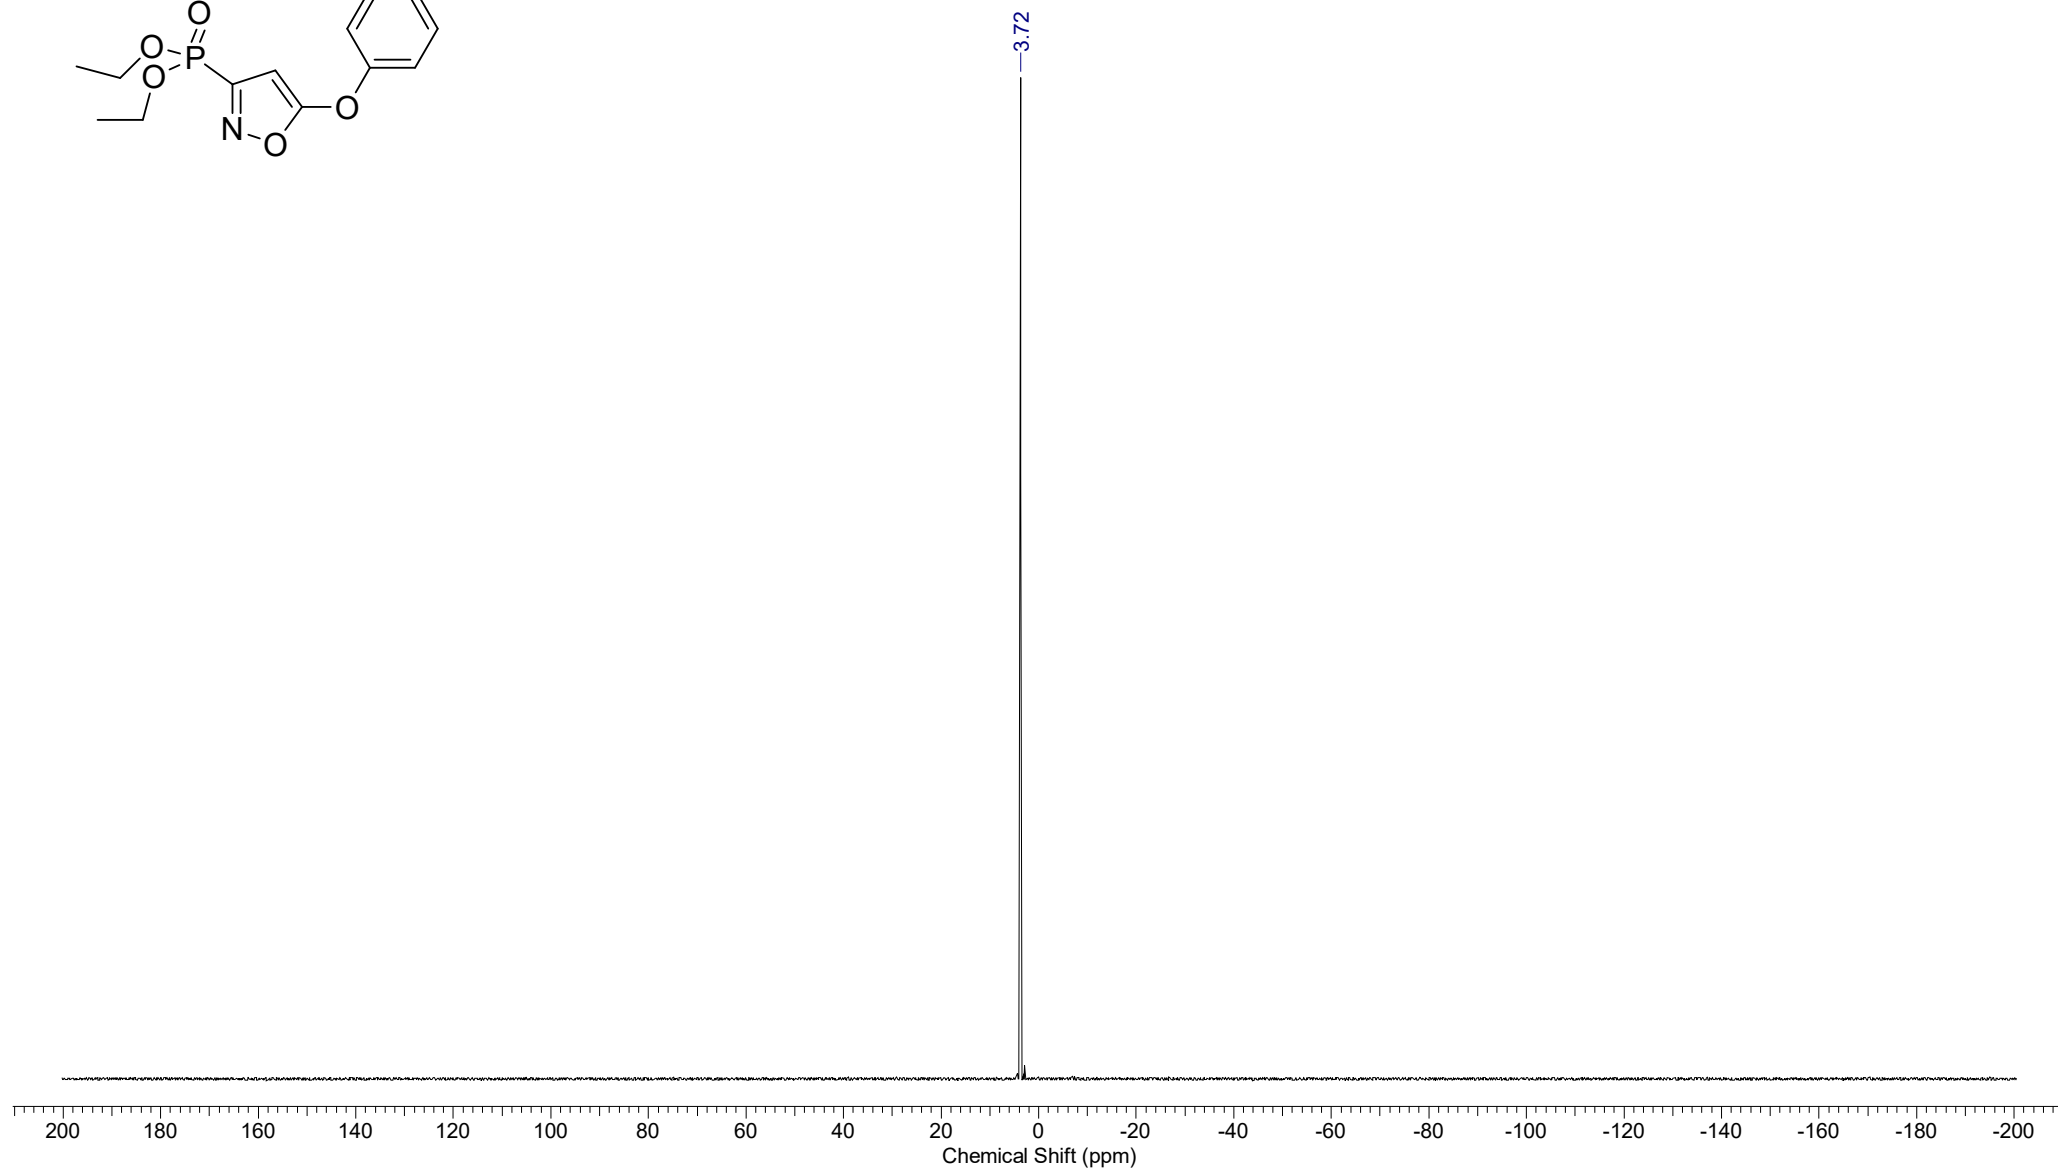

# Diethyl (5-(phenylsulfanyl)isoxazol-3-yl)phosphonate **2zb** ( $^1\text{H}$ NMR)

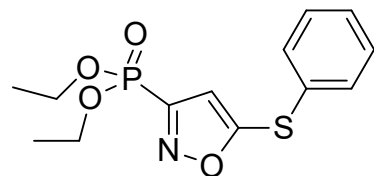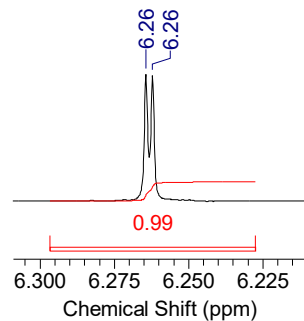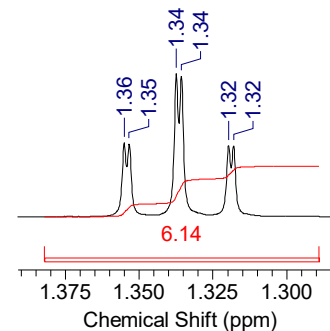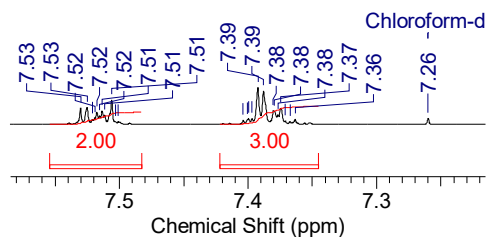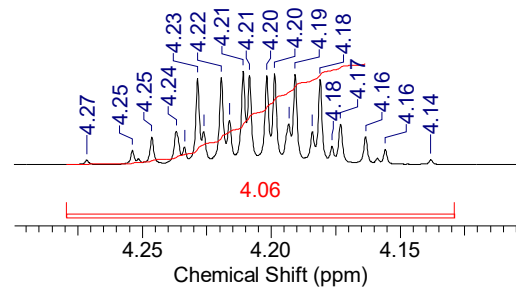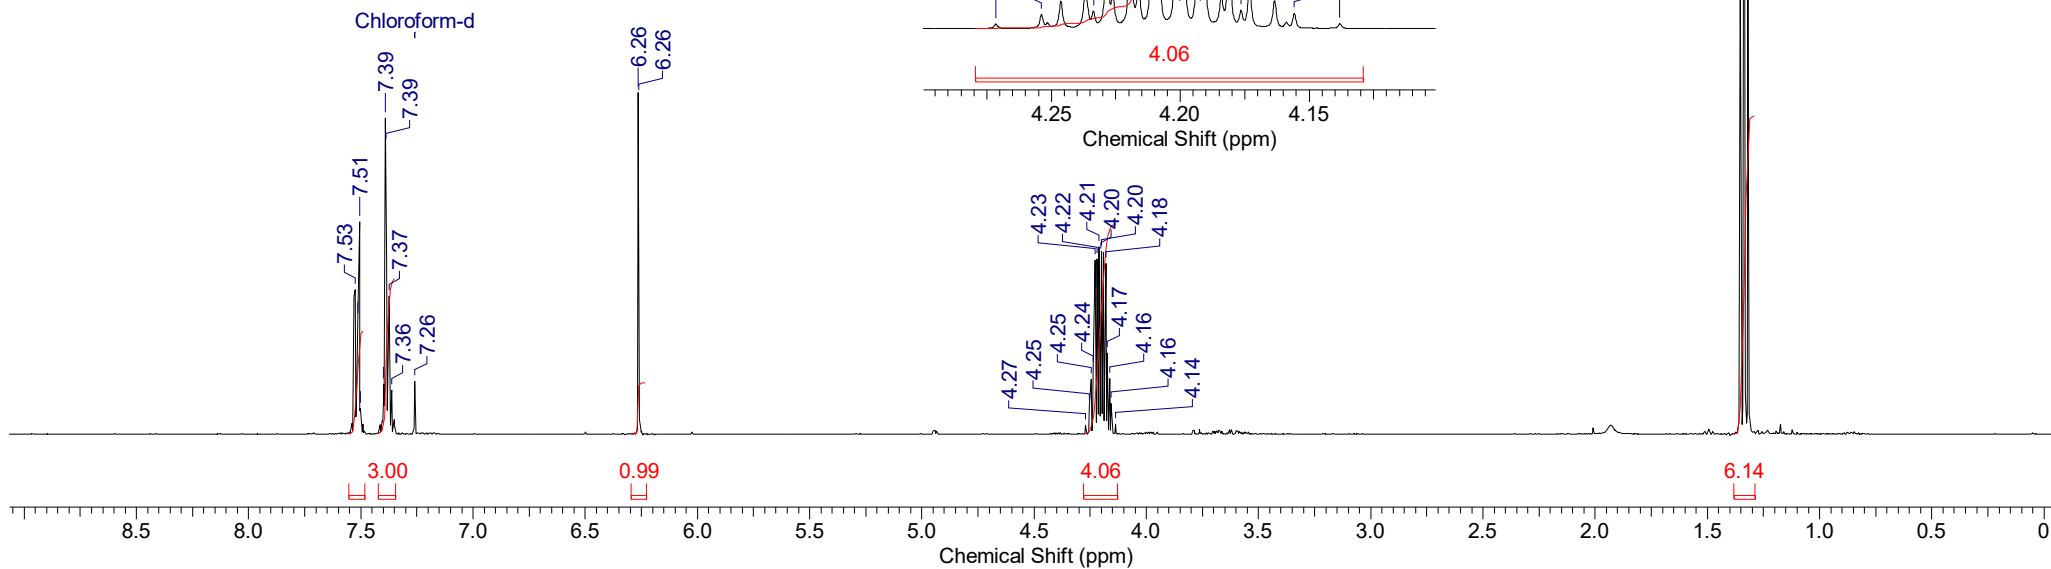

# Diethyl (5-(phenylsulfanyl)isoxazol-3-yl)phosphonate **2zb** ( $^{13}\text{C}$ NMR)

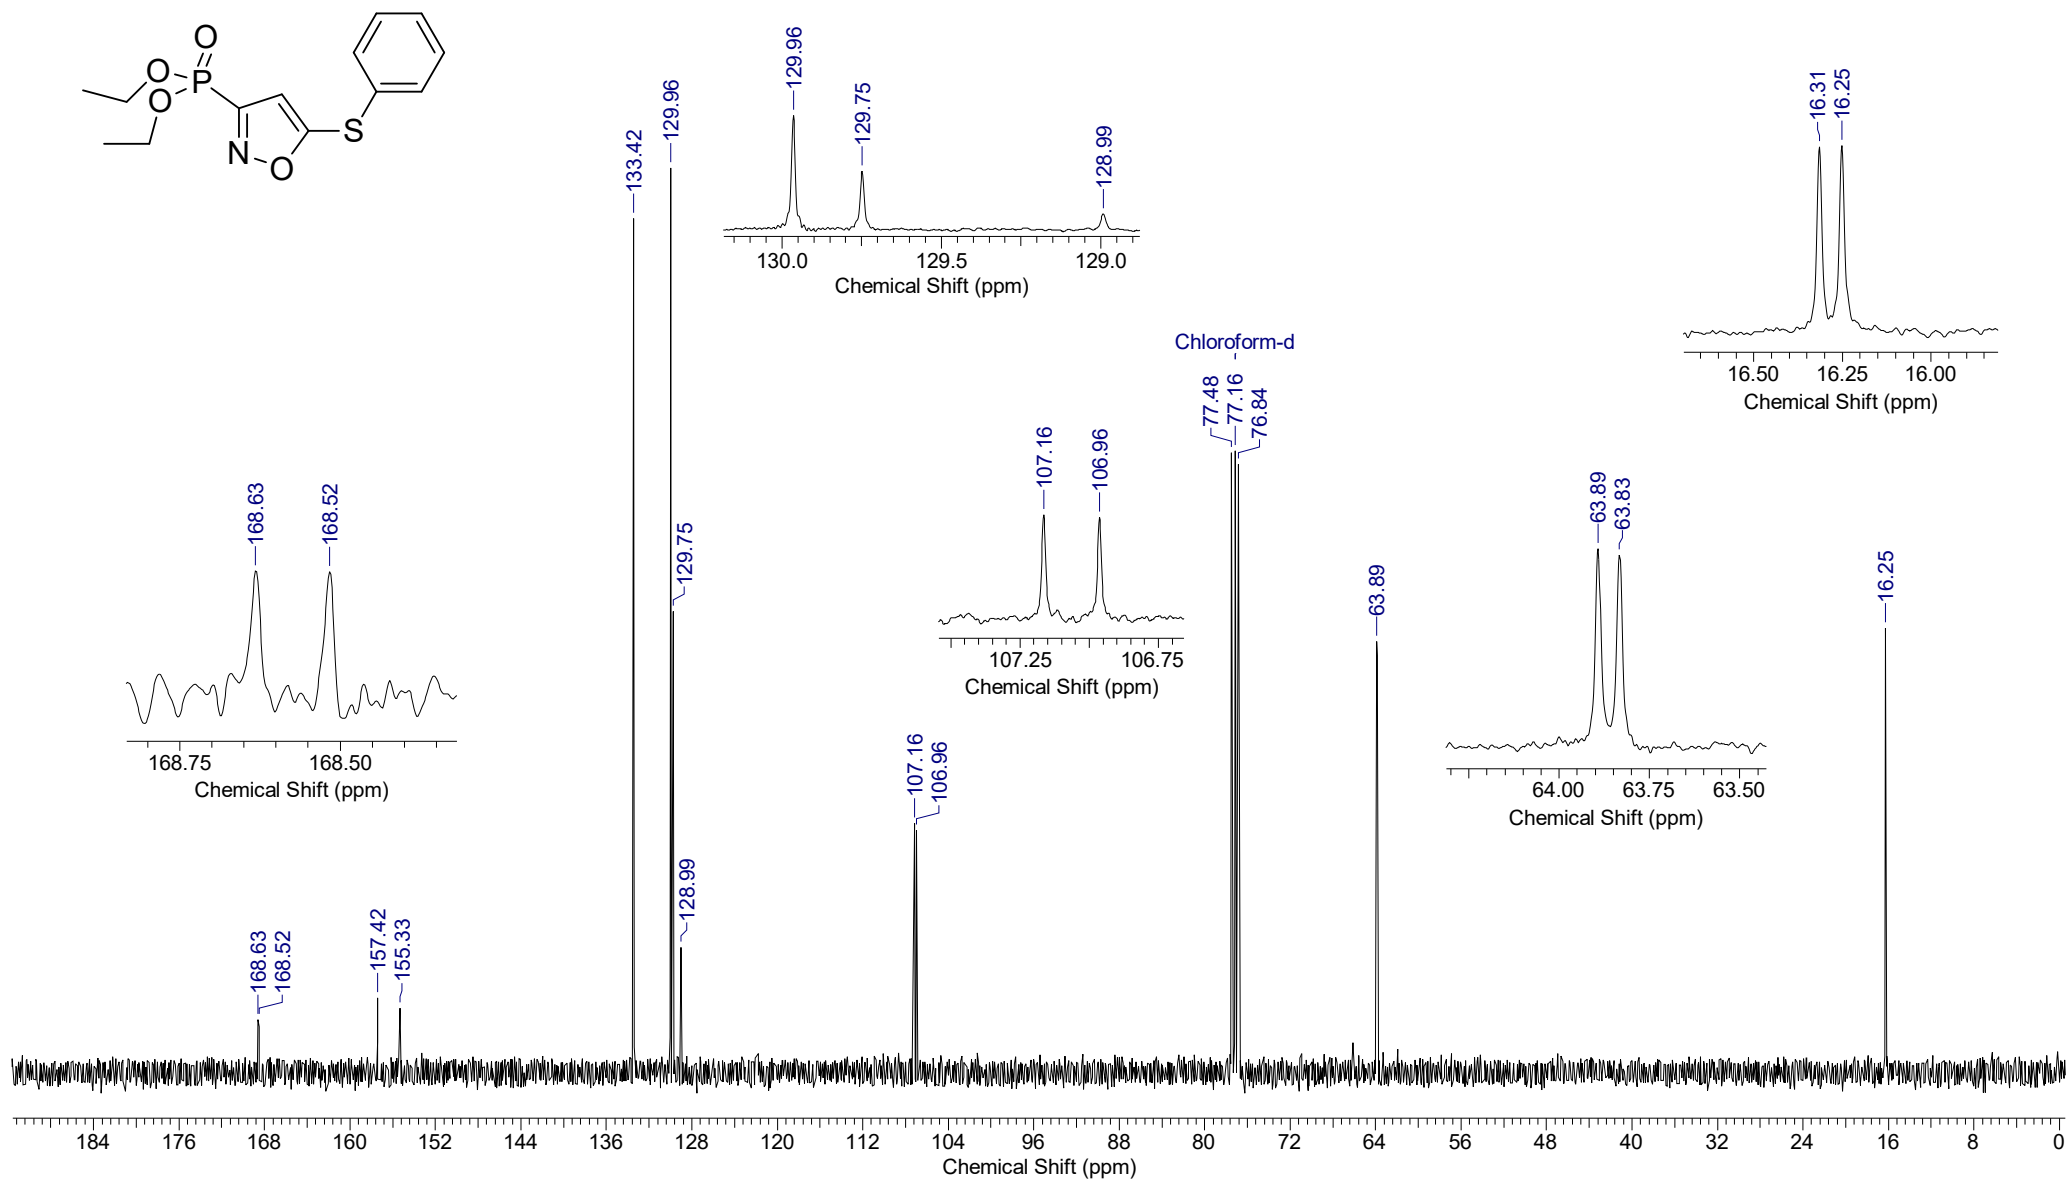

Diethyl (5-(phenylsulfanyl)isoxazol-3-yl)phosphonate **2zb** ( $^{31}\text{P}$  NMR)

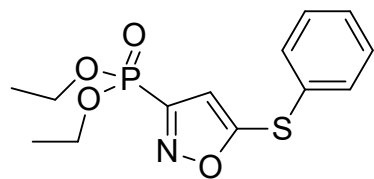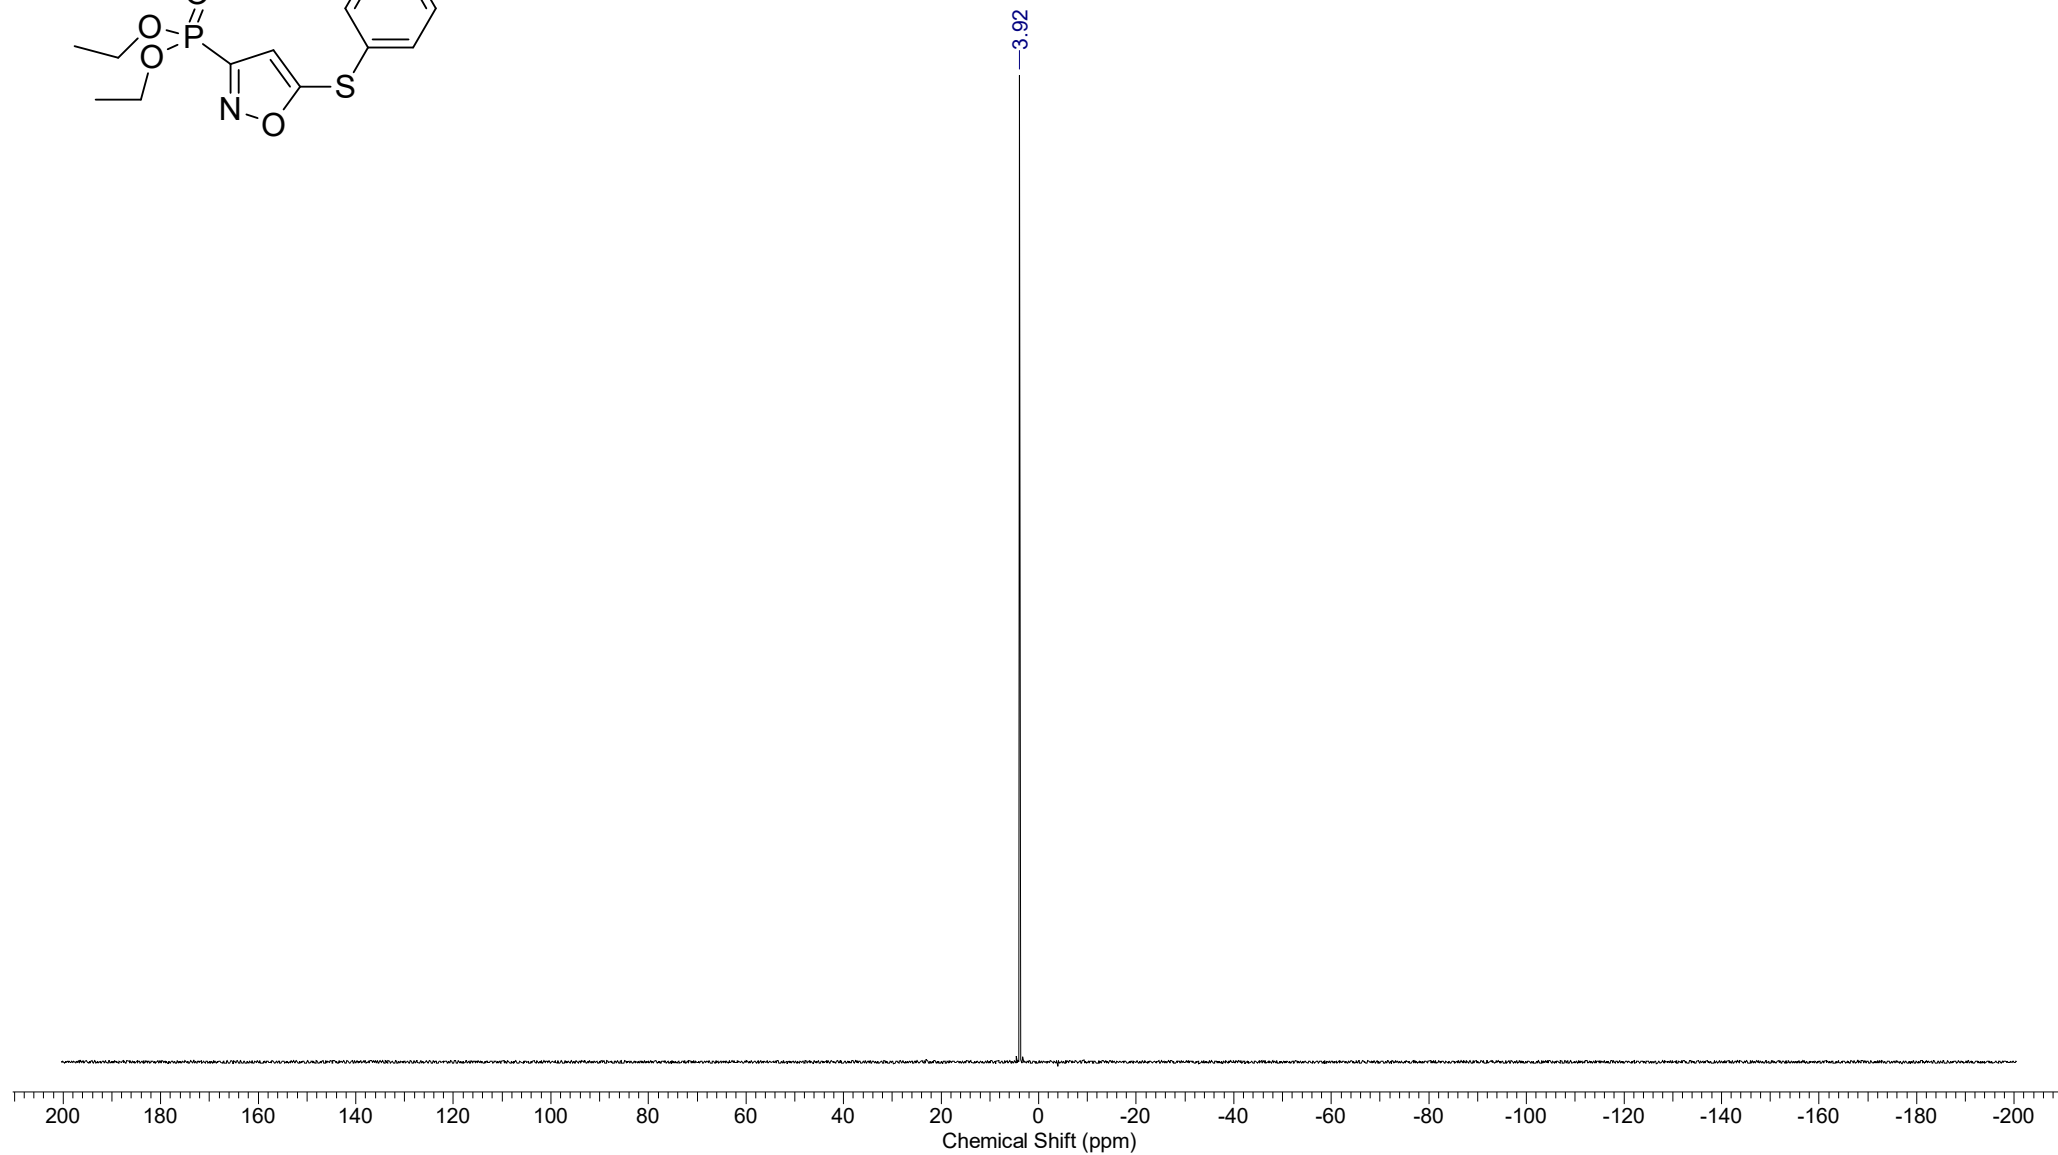

# Adamantan-1-ylmethyl 5-morpholinoisoxazole-3-carboxylate **2zc** ( $^1\text{H}$ NMR)

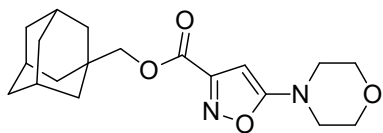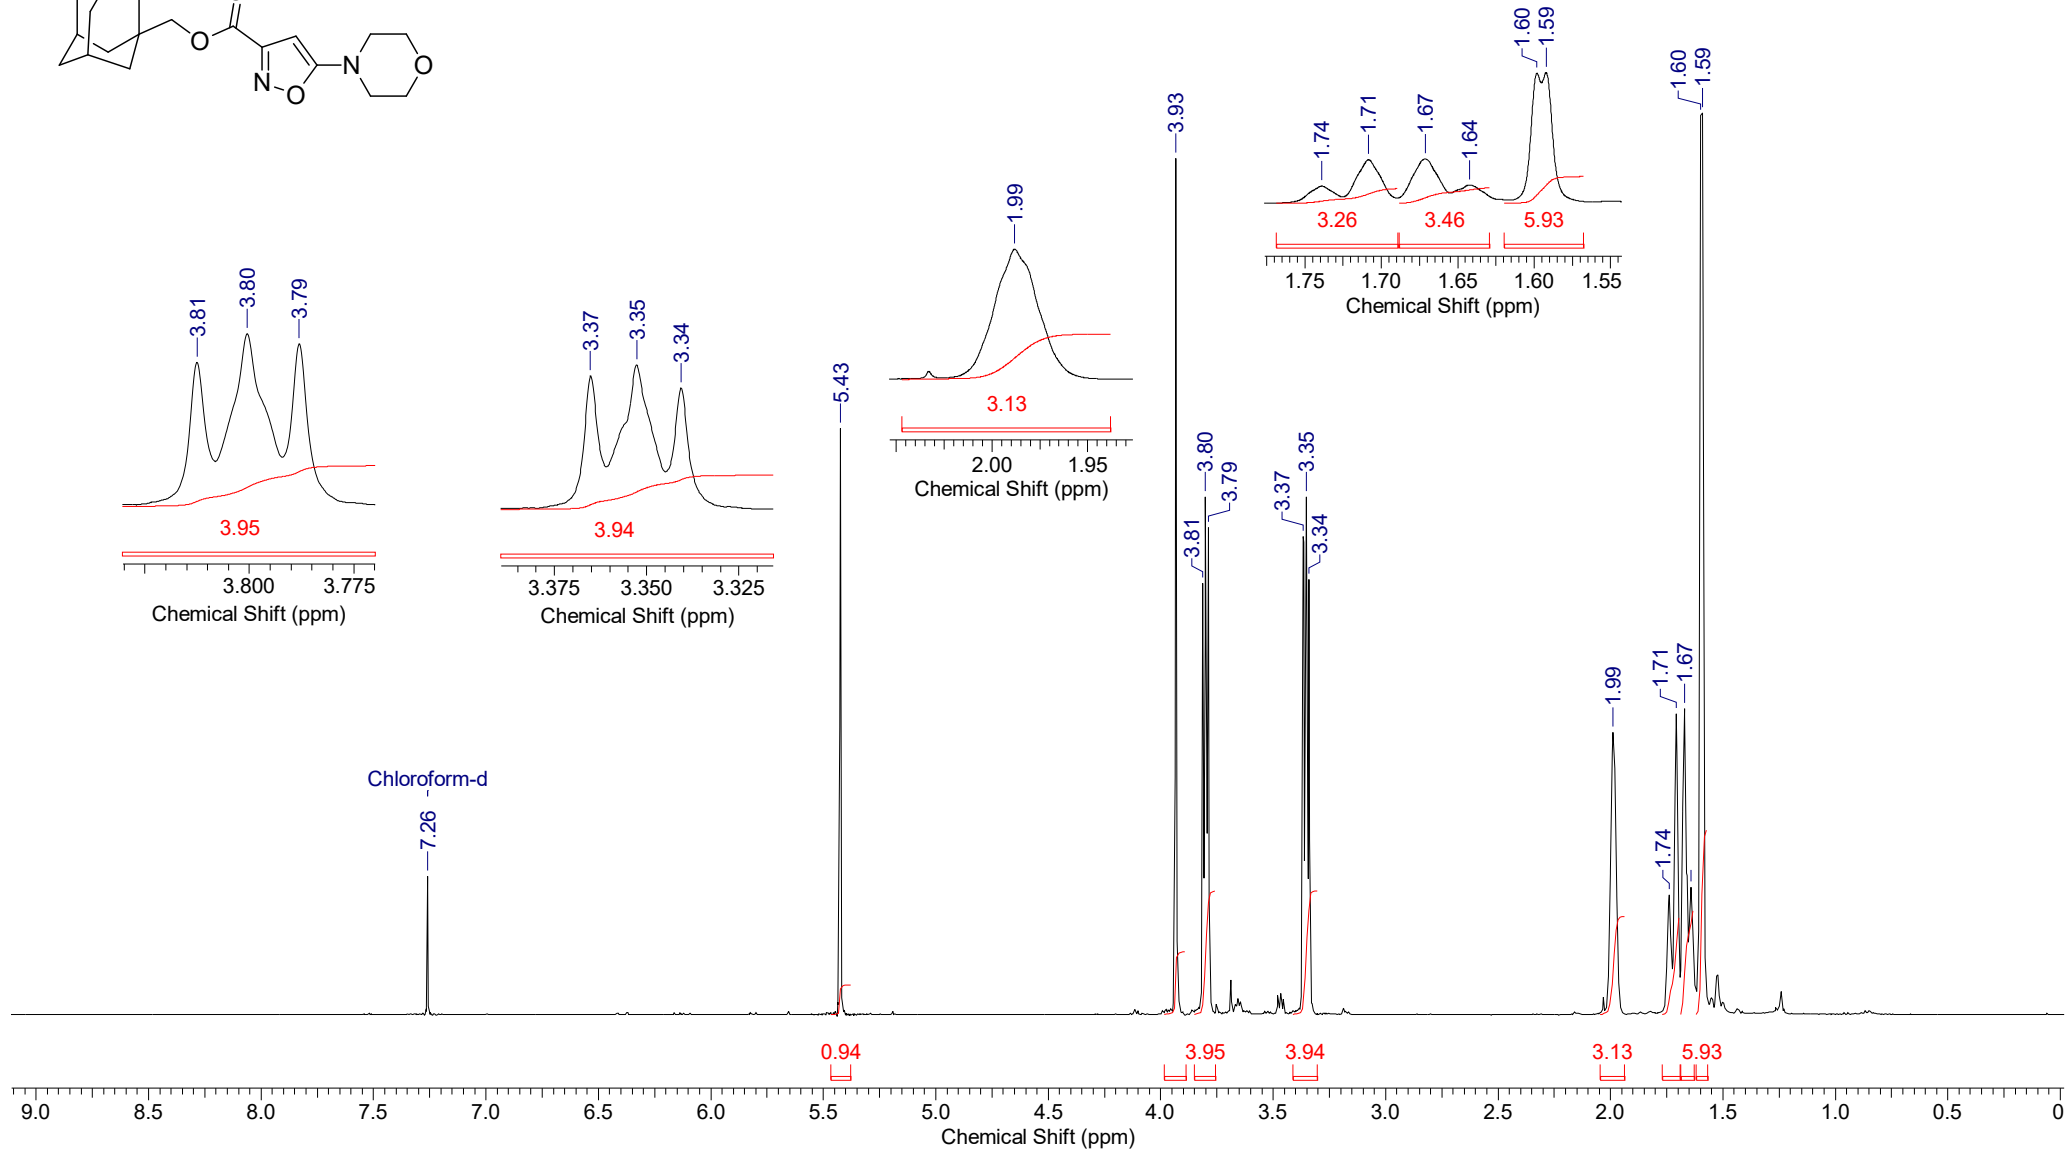

# Adamantan-1-ylmethyl 5-morpholinoisoxazole-3-carboxylate **2zc** ( $^1\text{H}$ NMR)

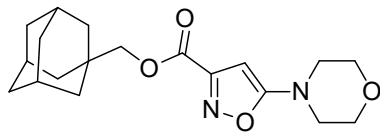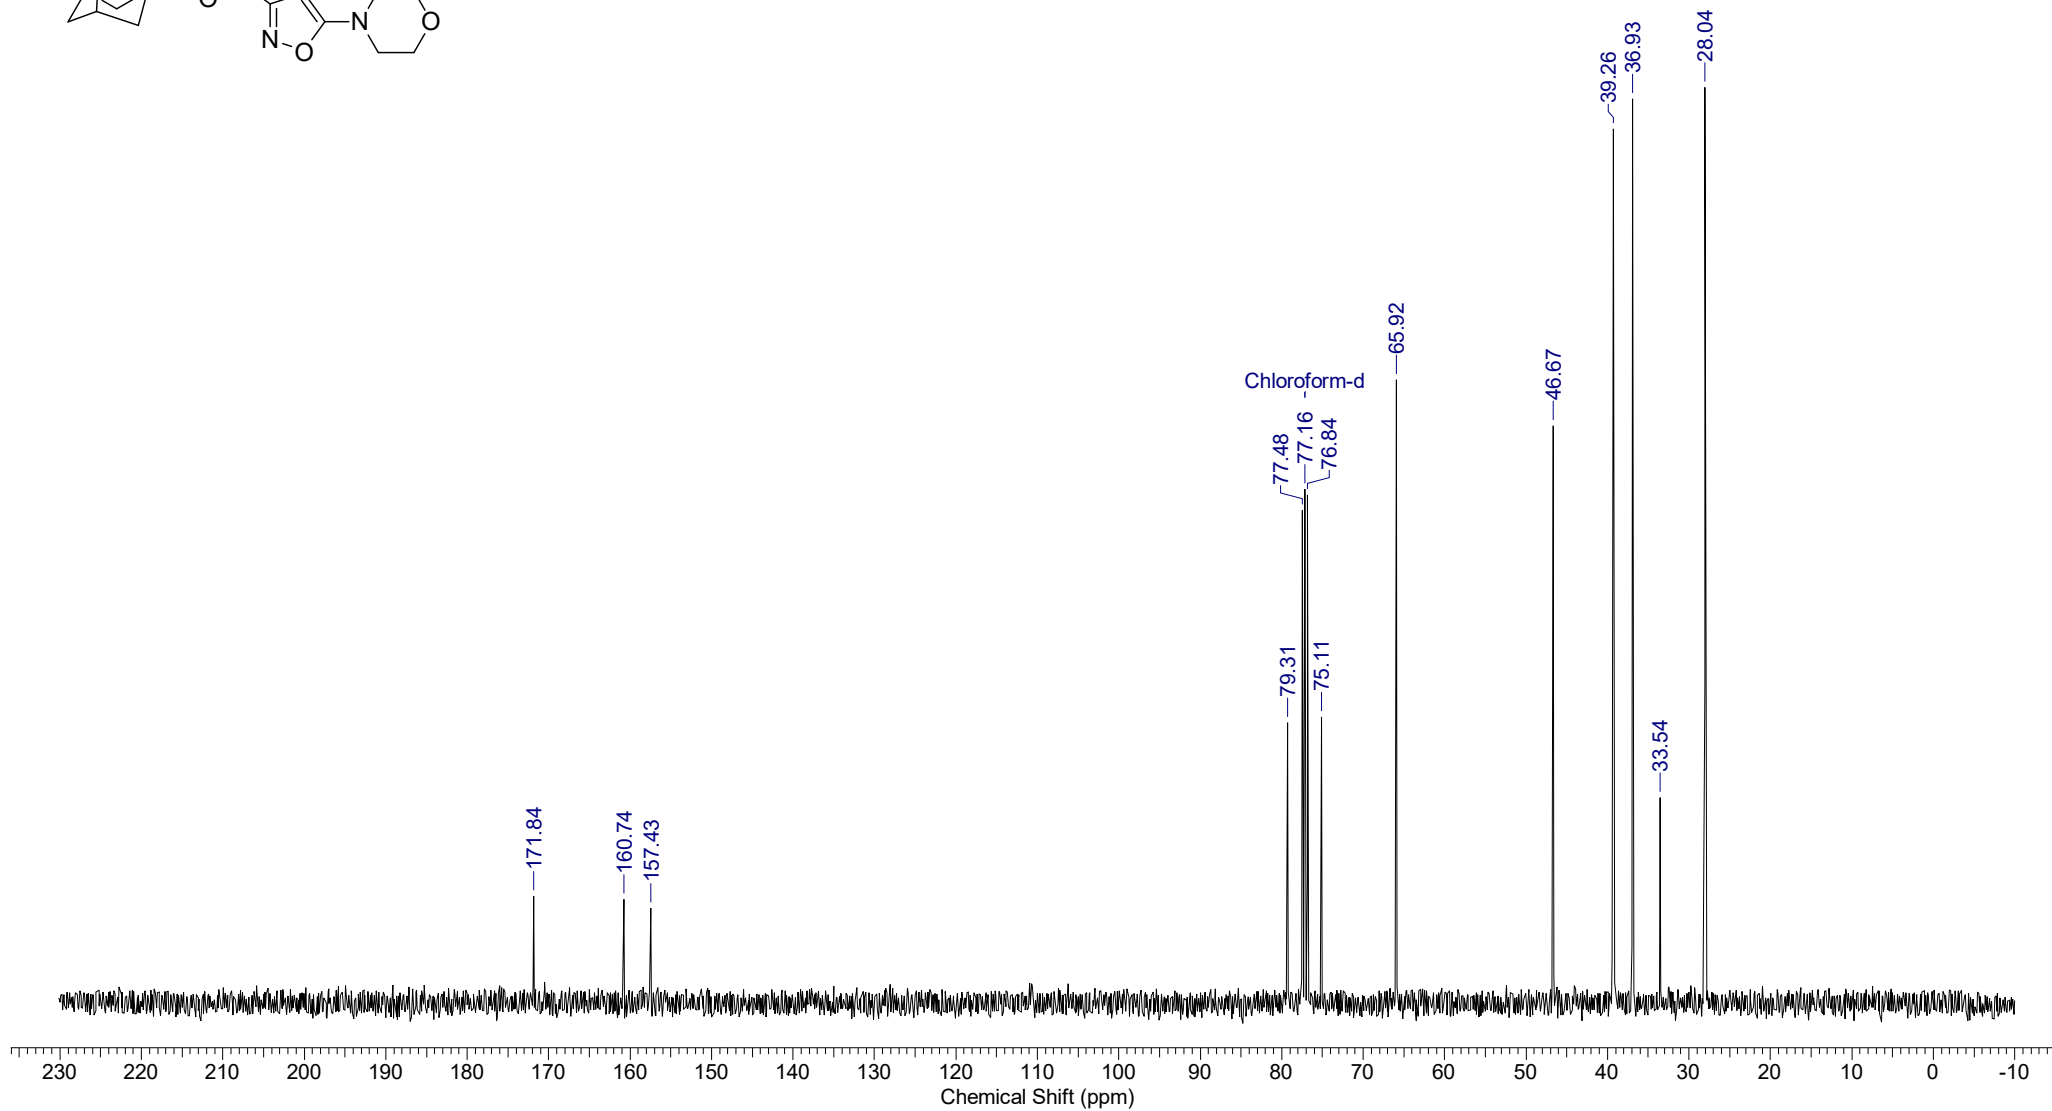

# Adamantan-1-ylmethyl 5-morpholinoisoxazole-3-carboxylate **2zc** (APT)

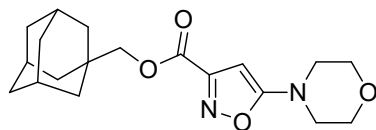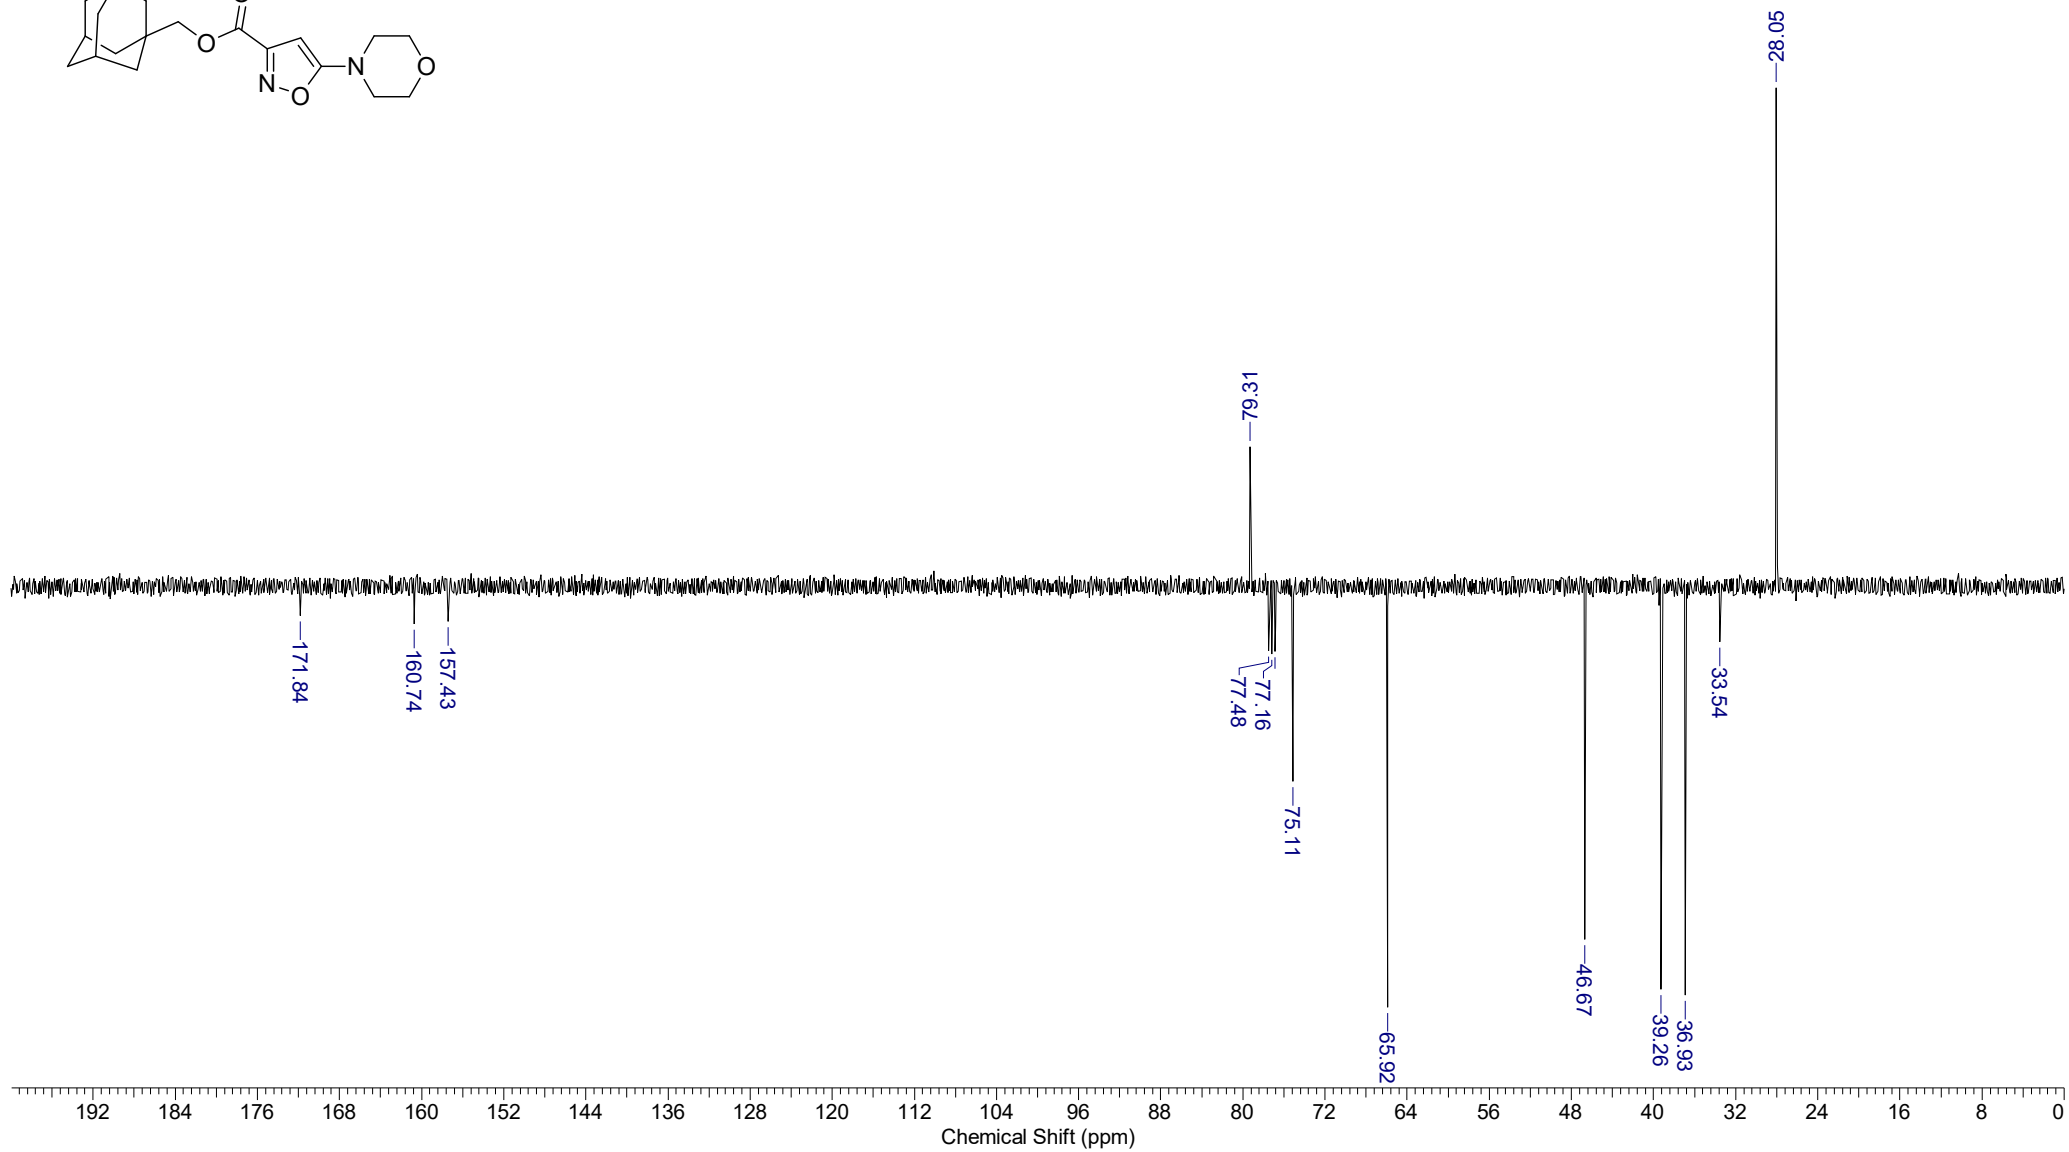

# Adamantan-1-ylmethyl 5-phenoxyisoxazole-3-carboxylate **2zd** ( $^1\text{H}$ NMR)

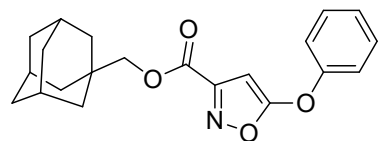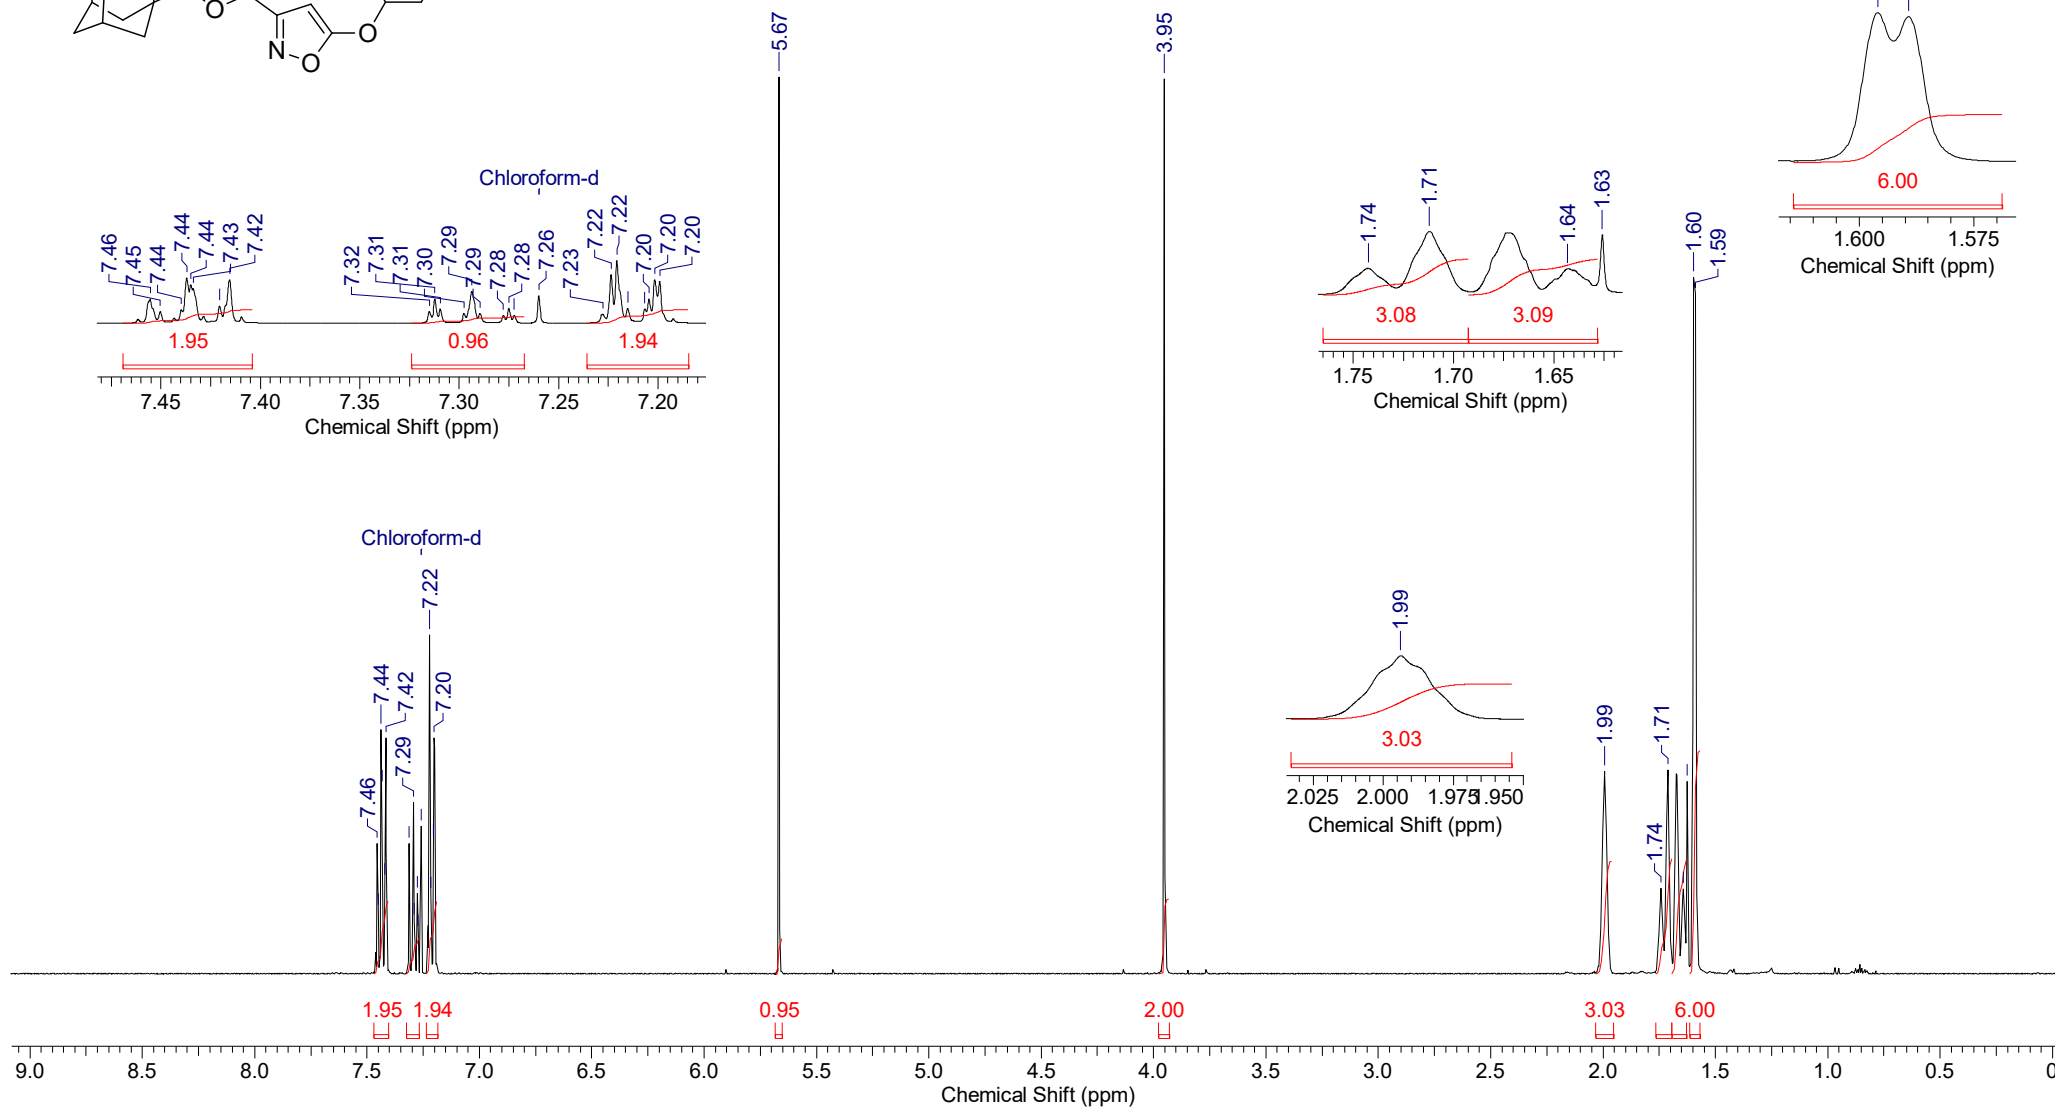



Adamantan-1-ylmethyl 5-phenoxyisoxazole-3-carboxylate **2zd** ( $^{13}\text{C}$  NMR)

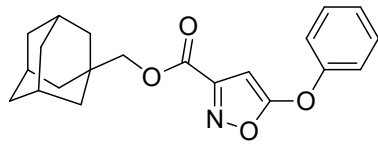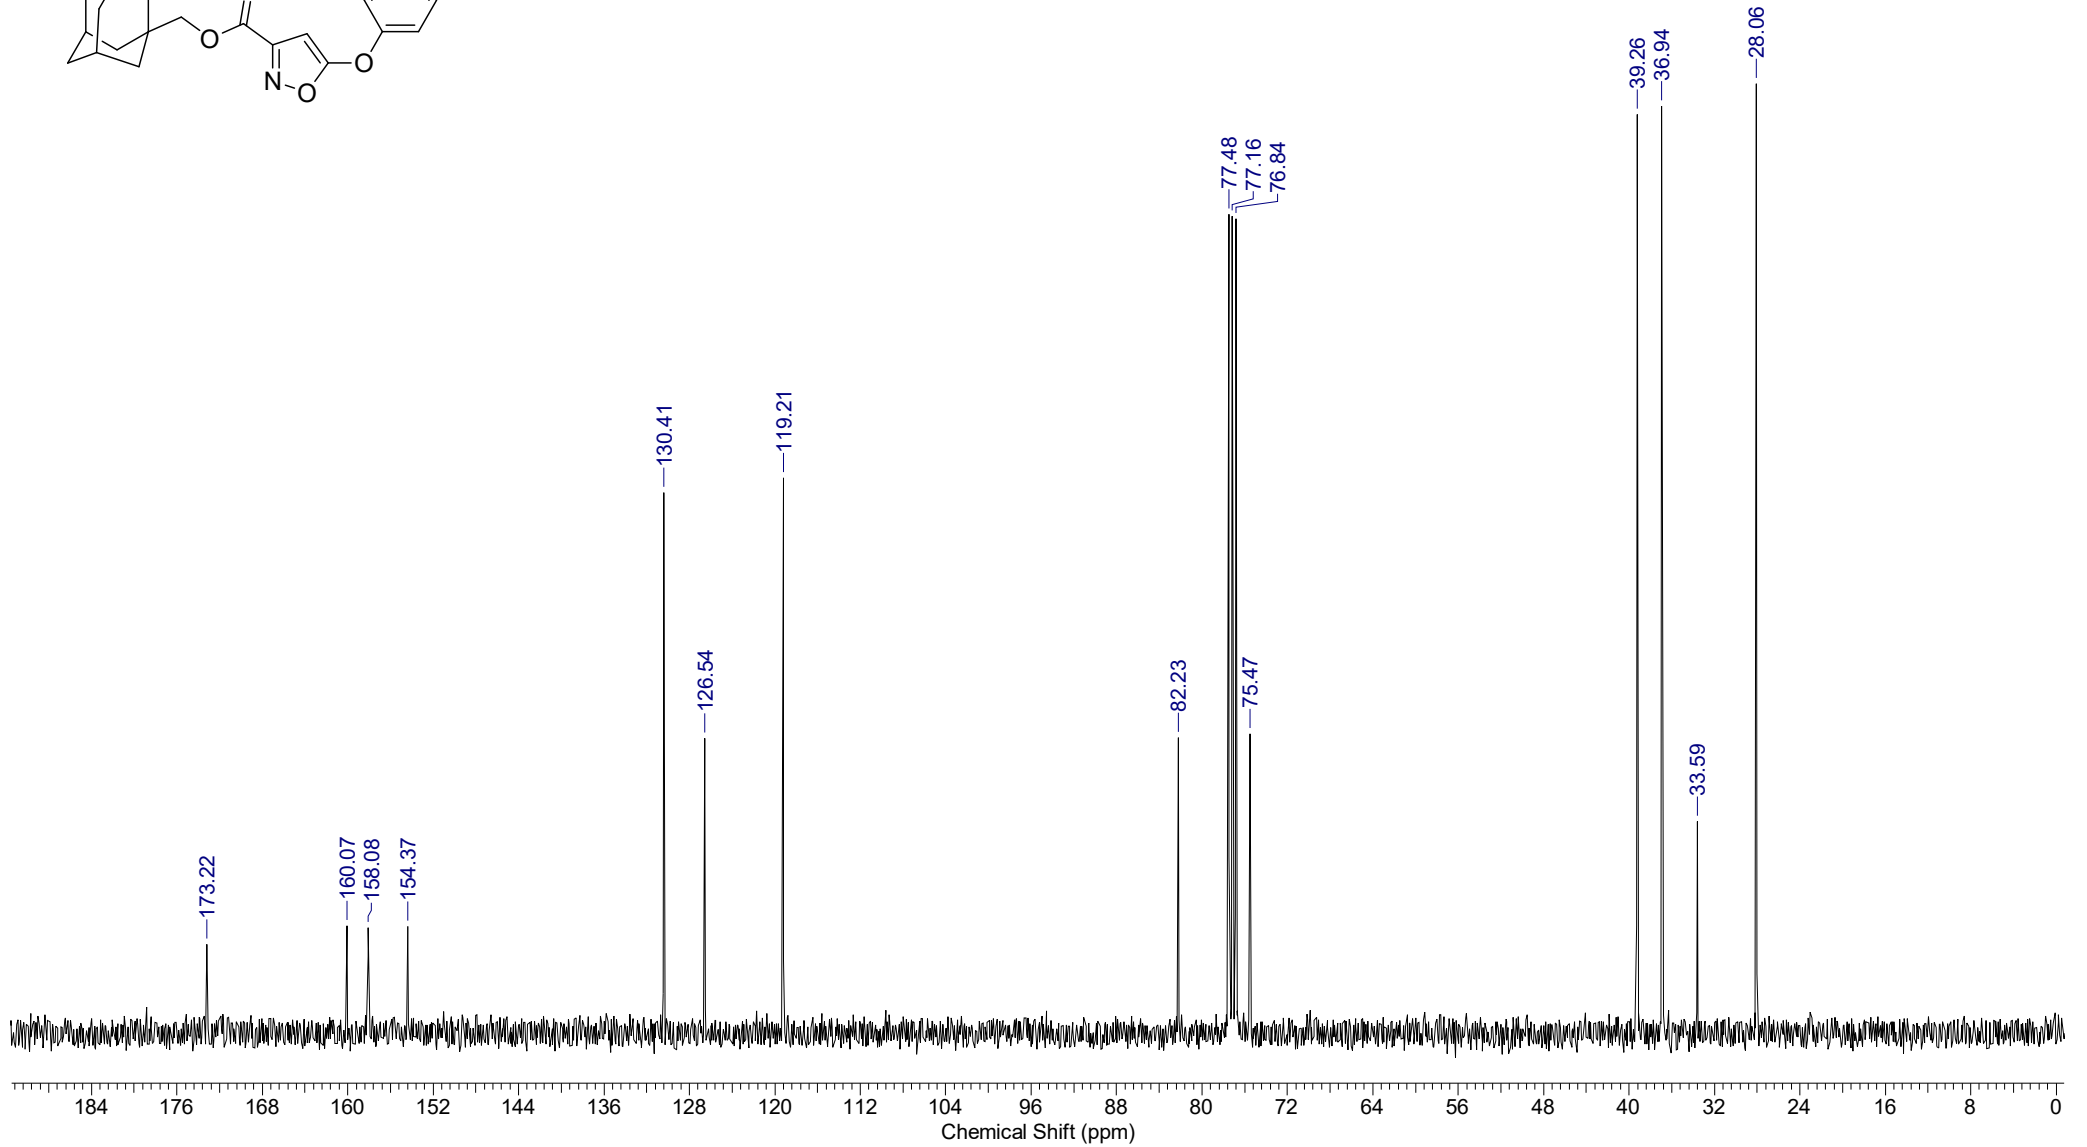

# Adamantan-1-ylmethyl 5-phenoxyisoxazole-3-carboxylate **2zd** (APT)

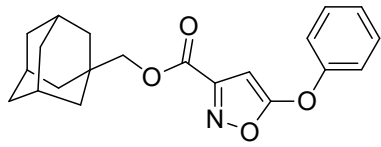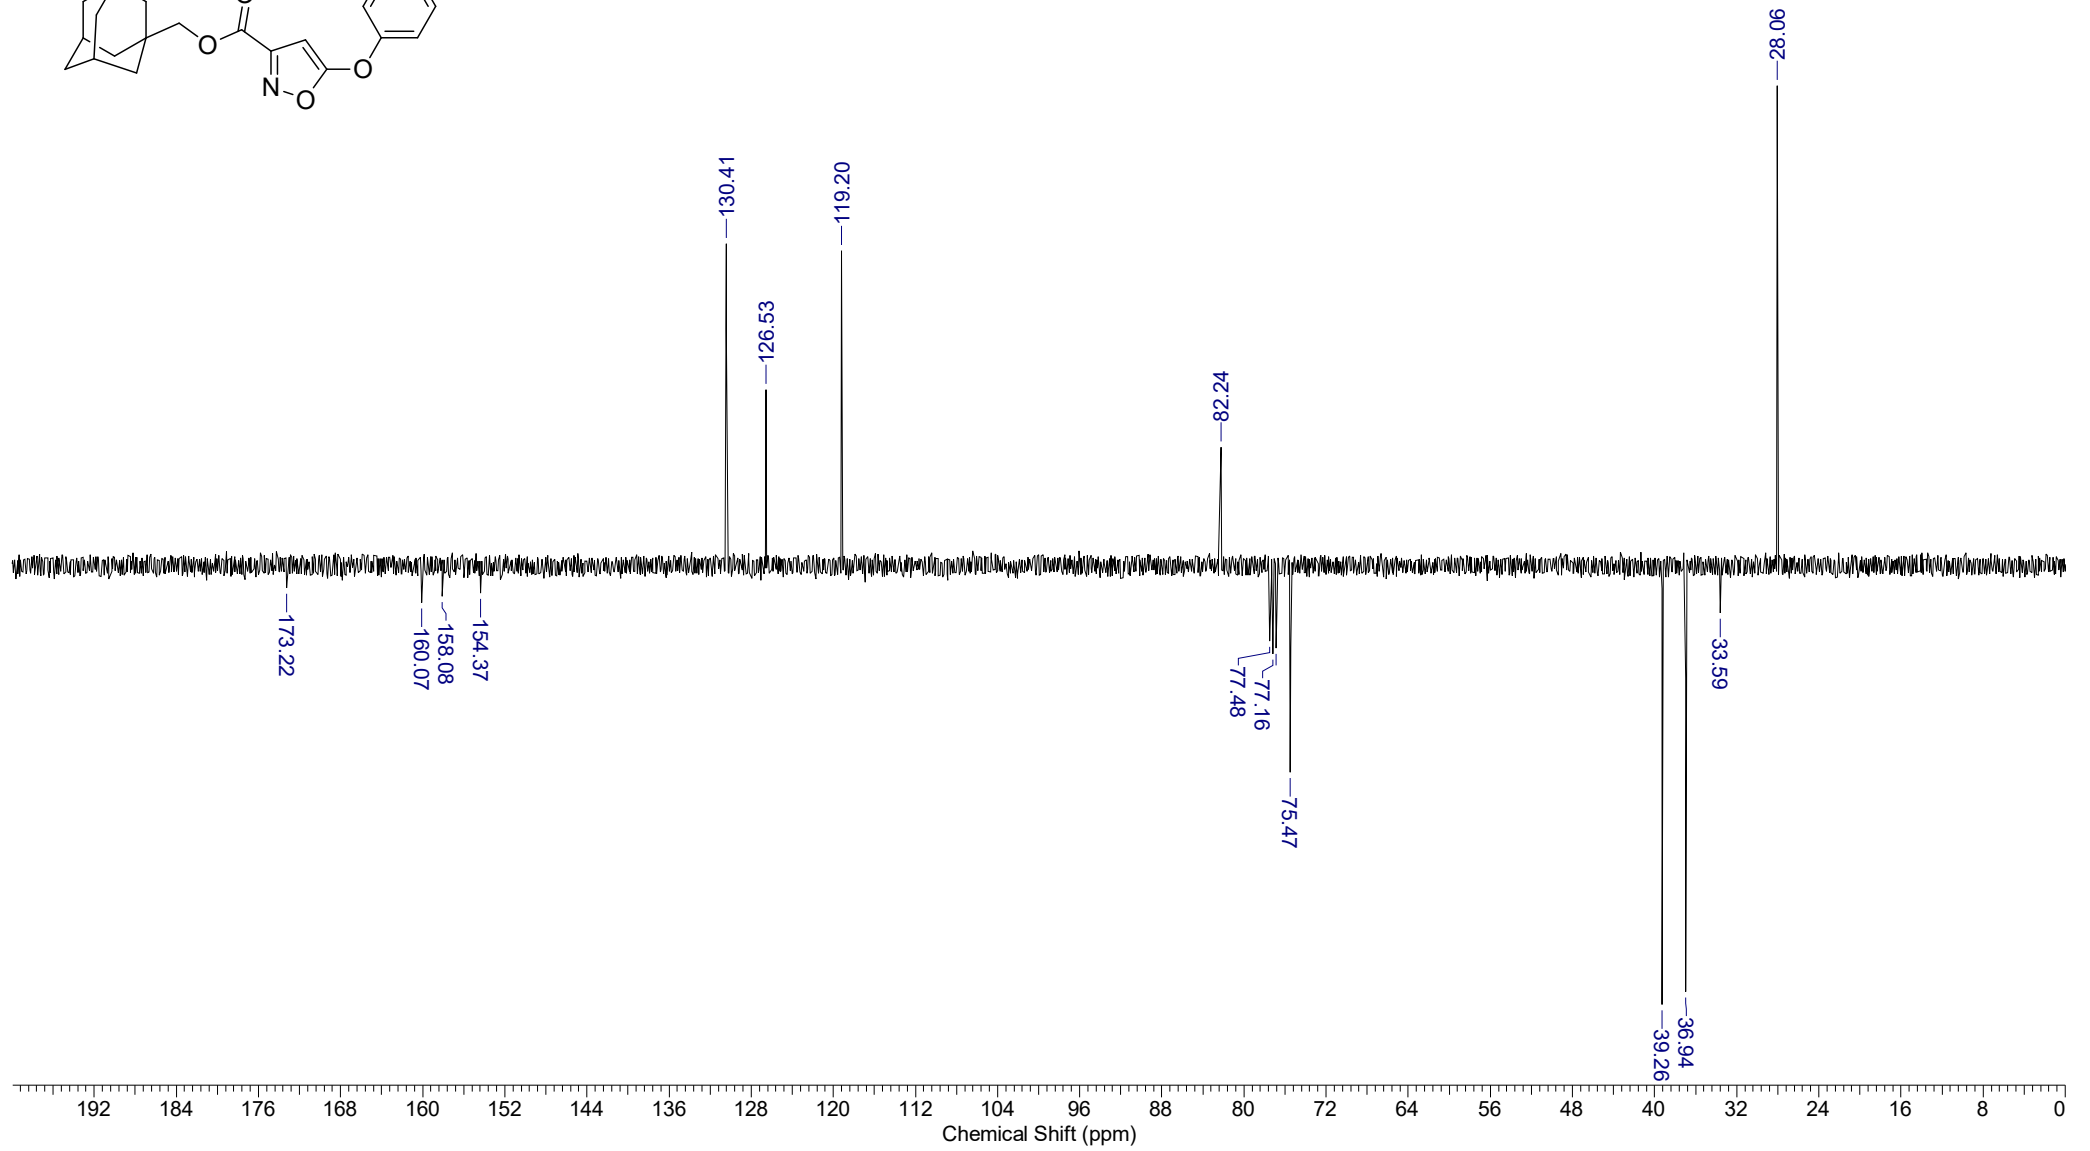

# Adamantan-1-ylmethyl 5-(phenylsulfanyl)isoxazole-3-carboxylate **2ze** ( $^1\text{H}$ NMR)

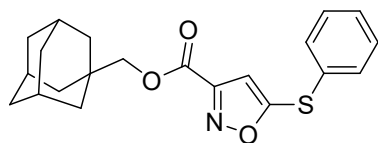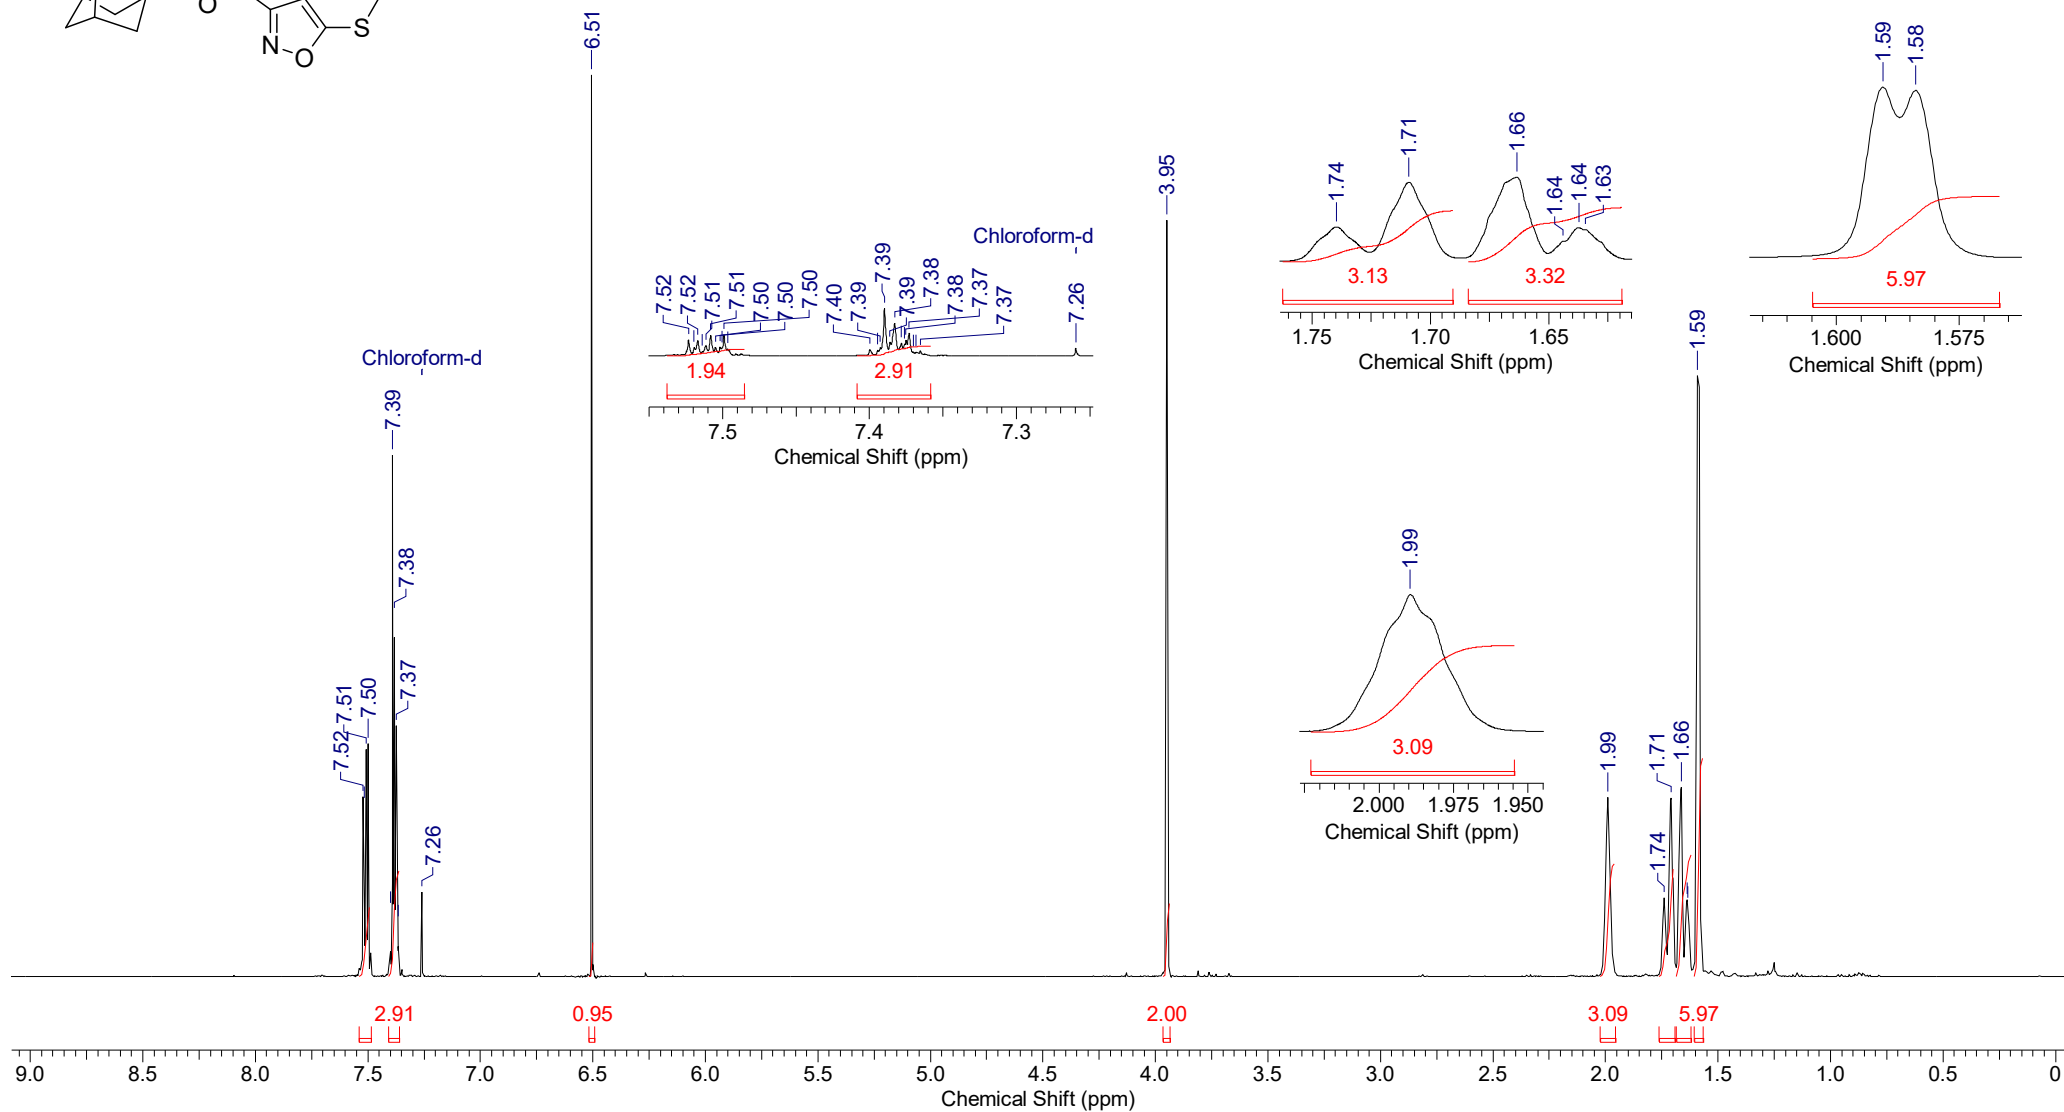

# Adamantan-1-ylmethyl 5-(phenylsulfanyl)isoxazole-3-carboxylate **2ze** ( $^{13}\text{C}$ NMR)

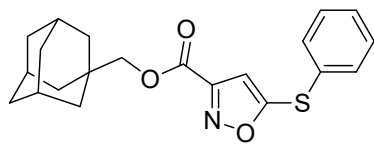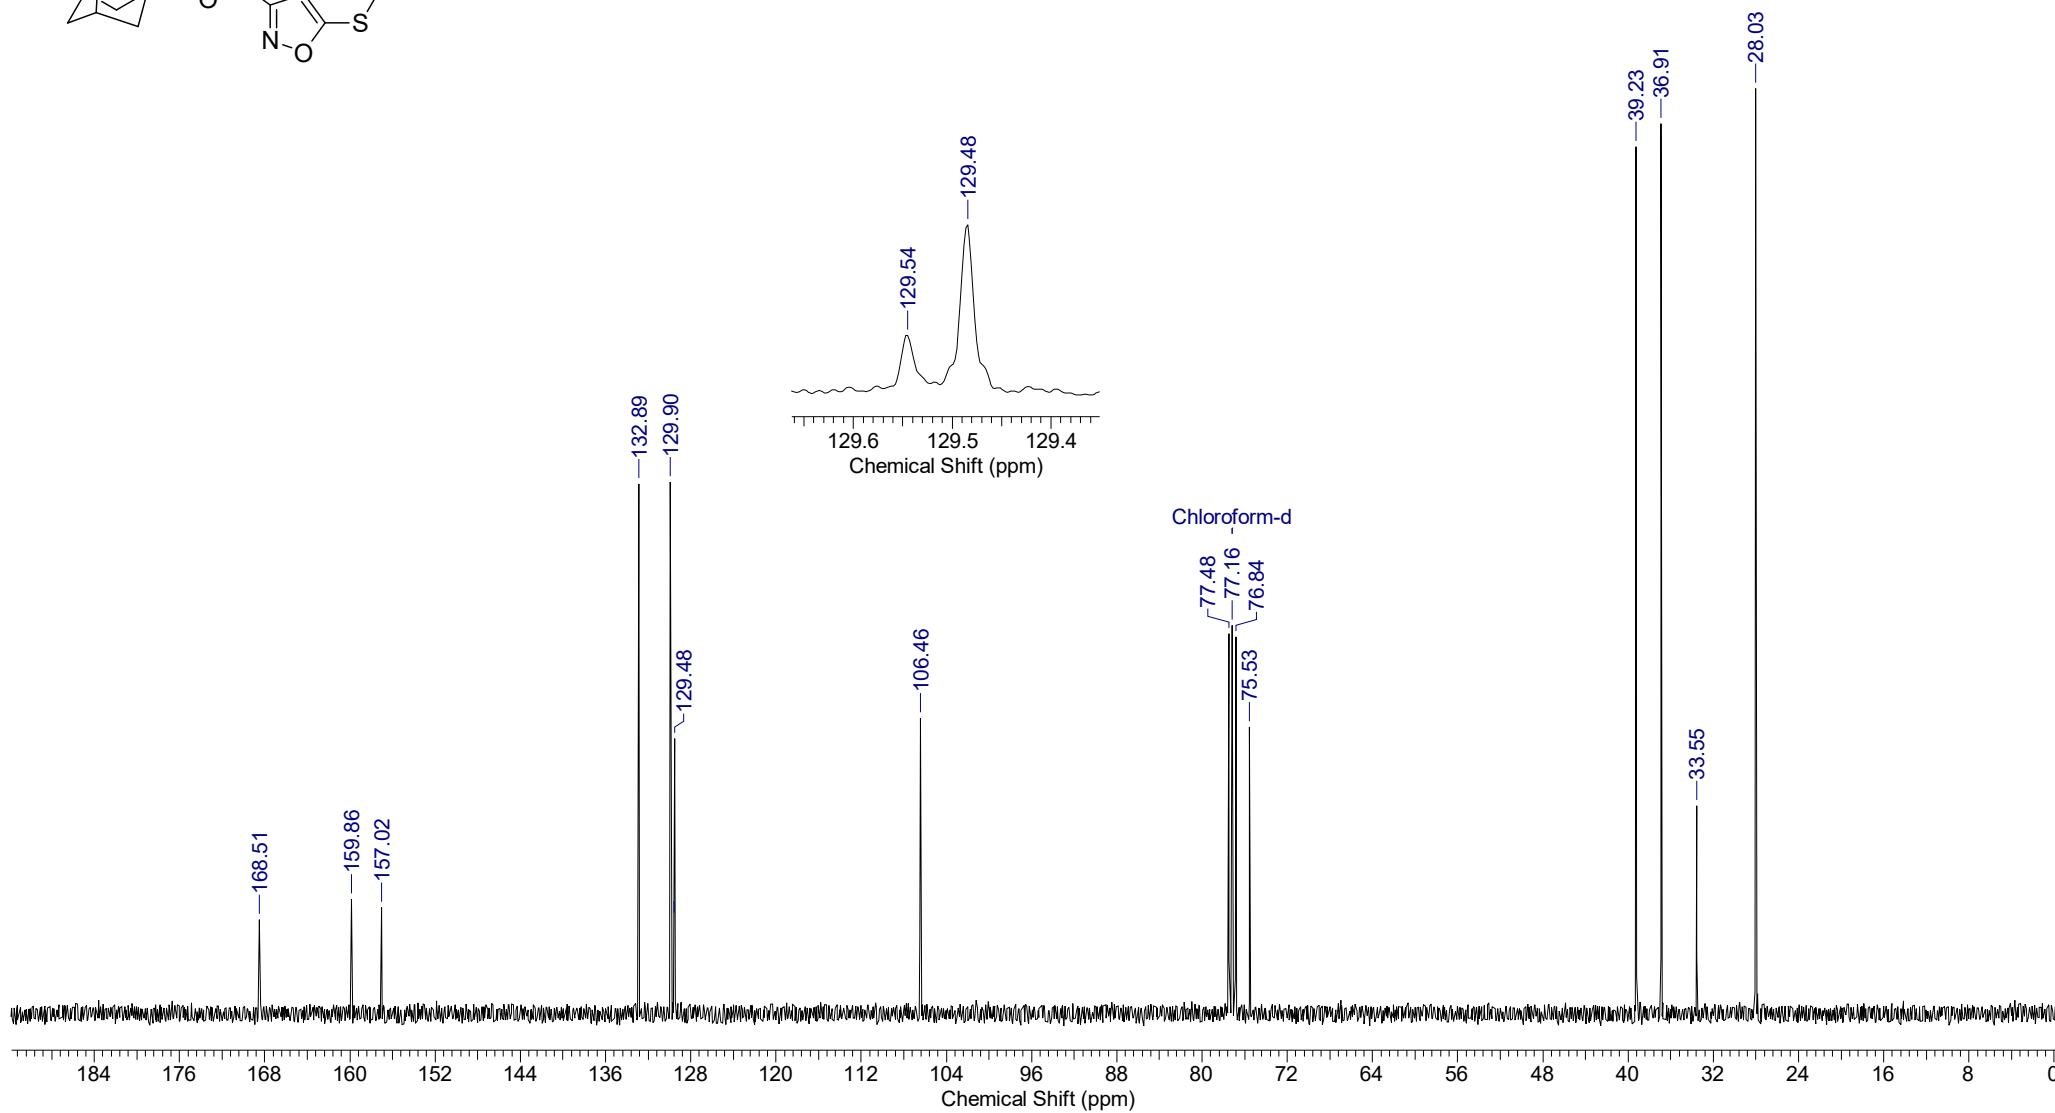

# Adamantan-1-ylmethyl 5-(phenylsulfanyl)isoxazole-3-carboxylate **2ze** (APT)

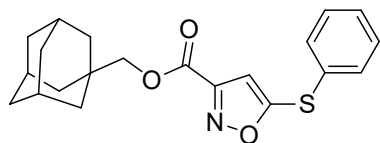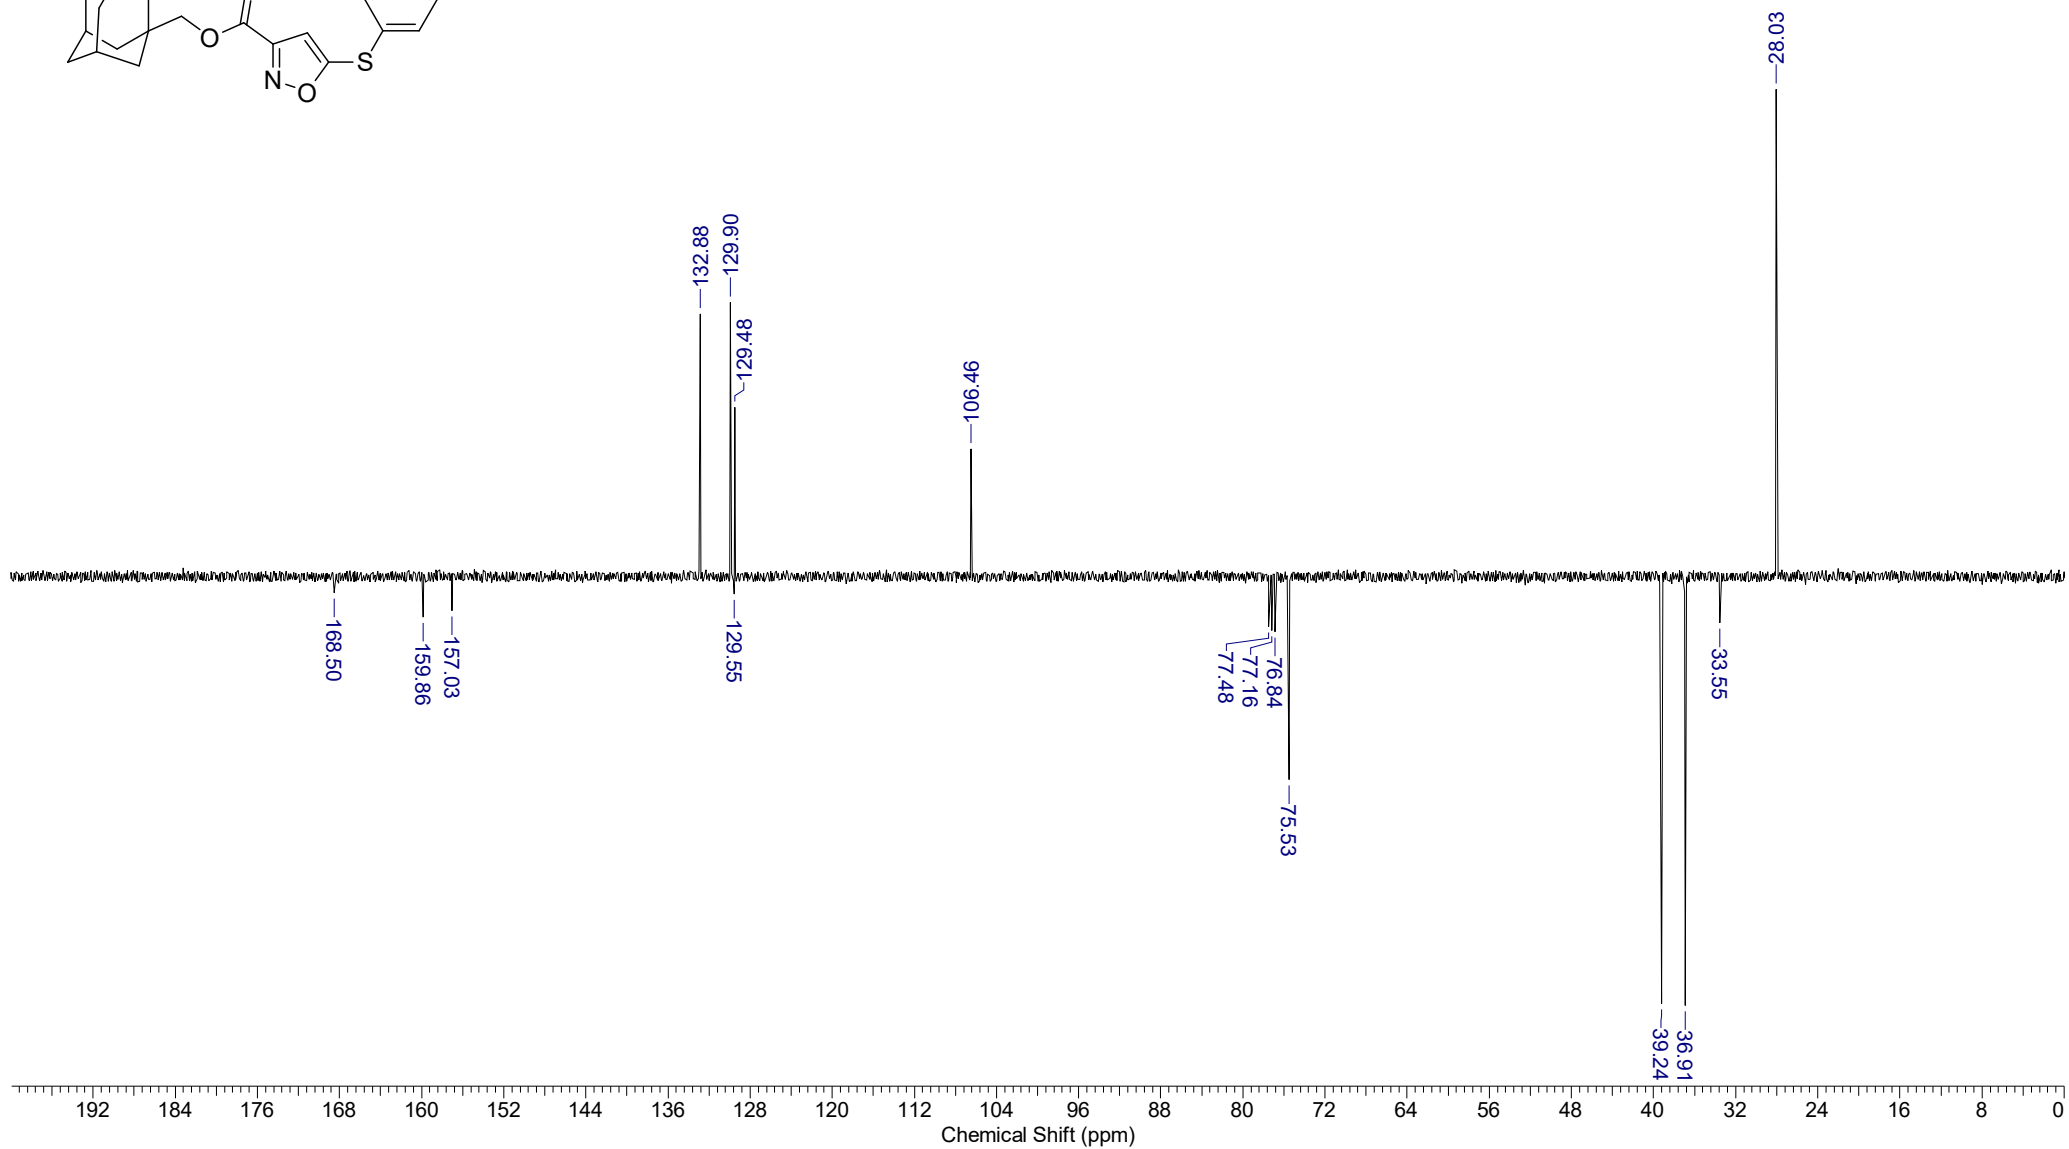



# Methyl 4-methyl-5-morpholinoisoxazole-3-carboxylate **2zf** ( $^{13}\text{C}$ NMR)

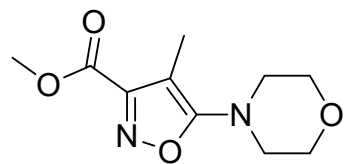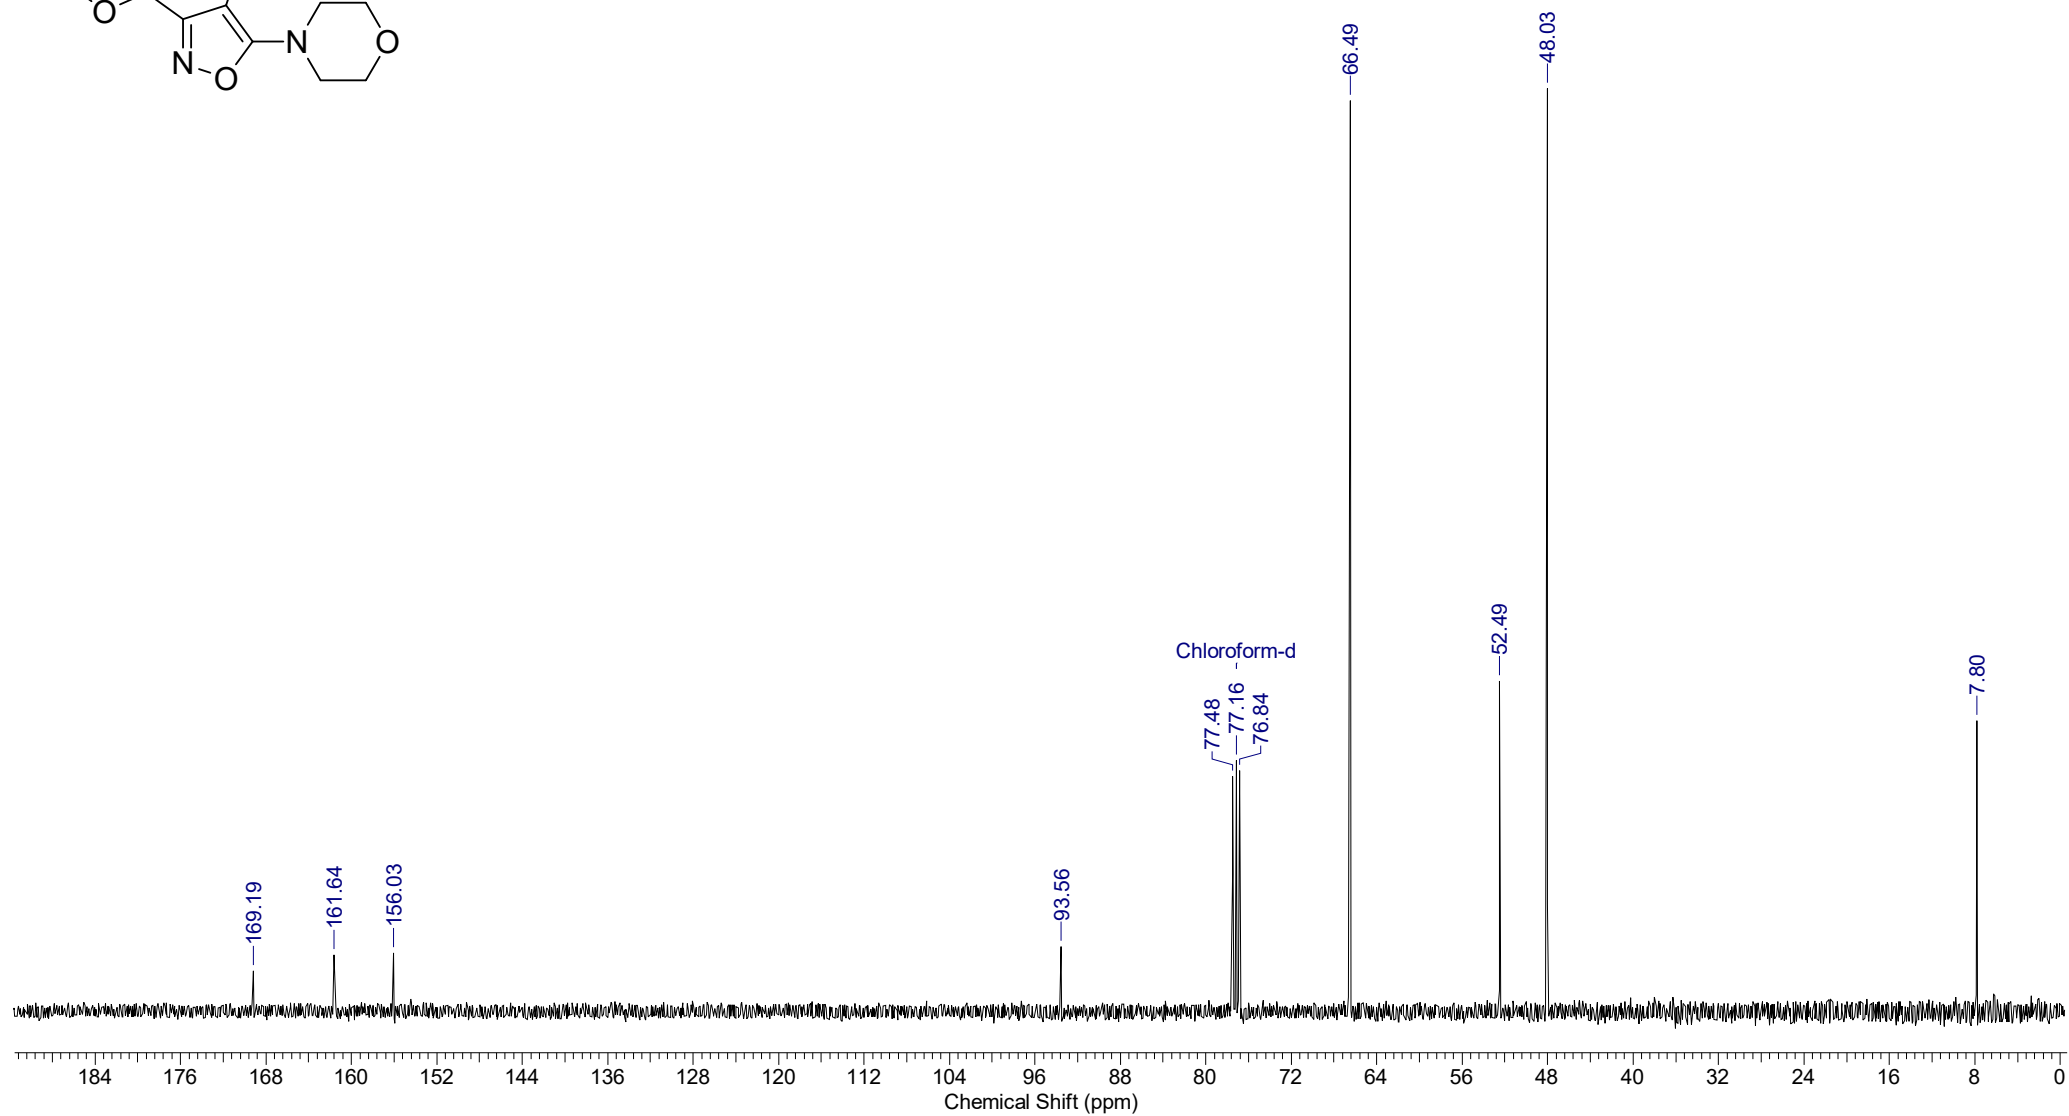

# Methyl 4-methyl-5-morpholinoisoxazole-3-carboxylate **2zf** (HMBC)

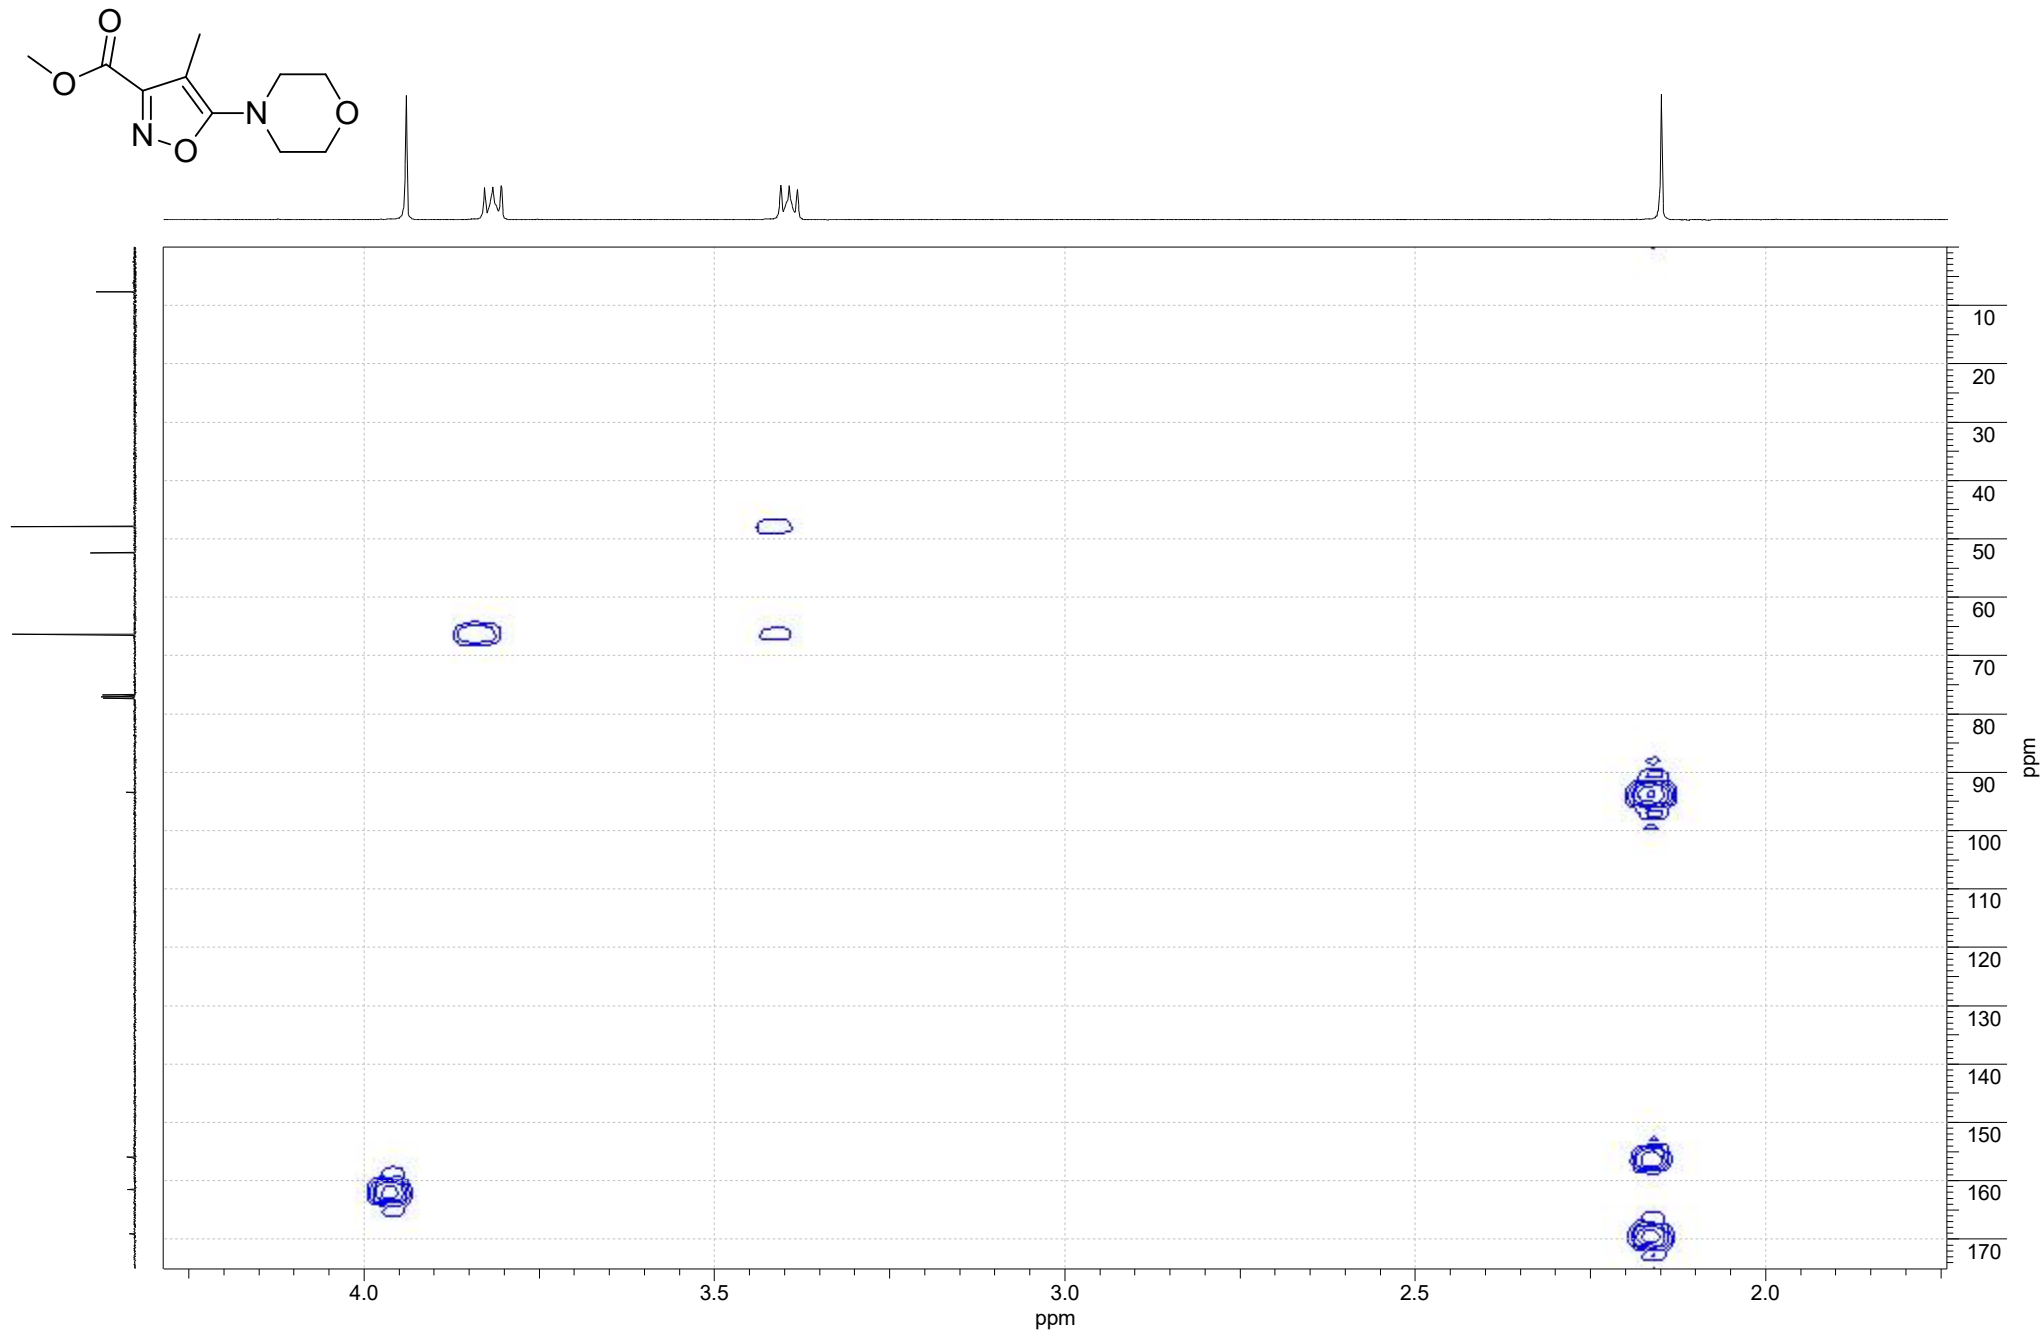



# 4-(3-Nitroisoxazol-5-yl)morpholine **2zg** ( $^1\text{H}$ NMR)

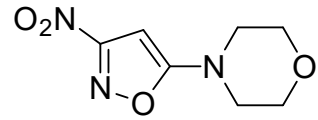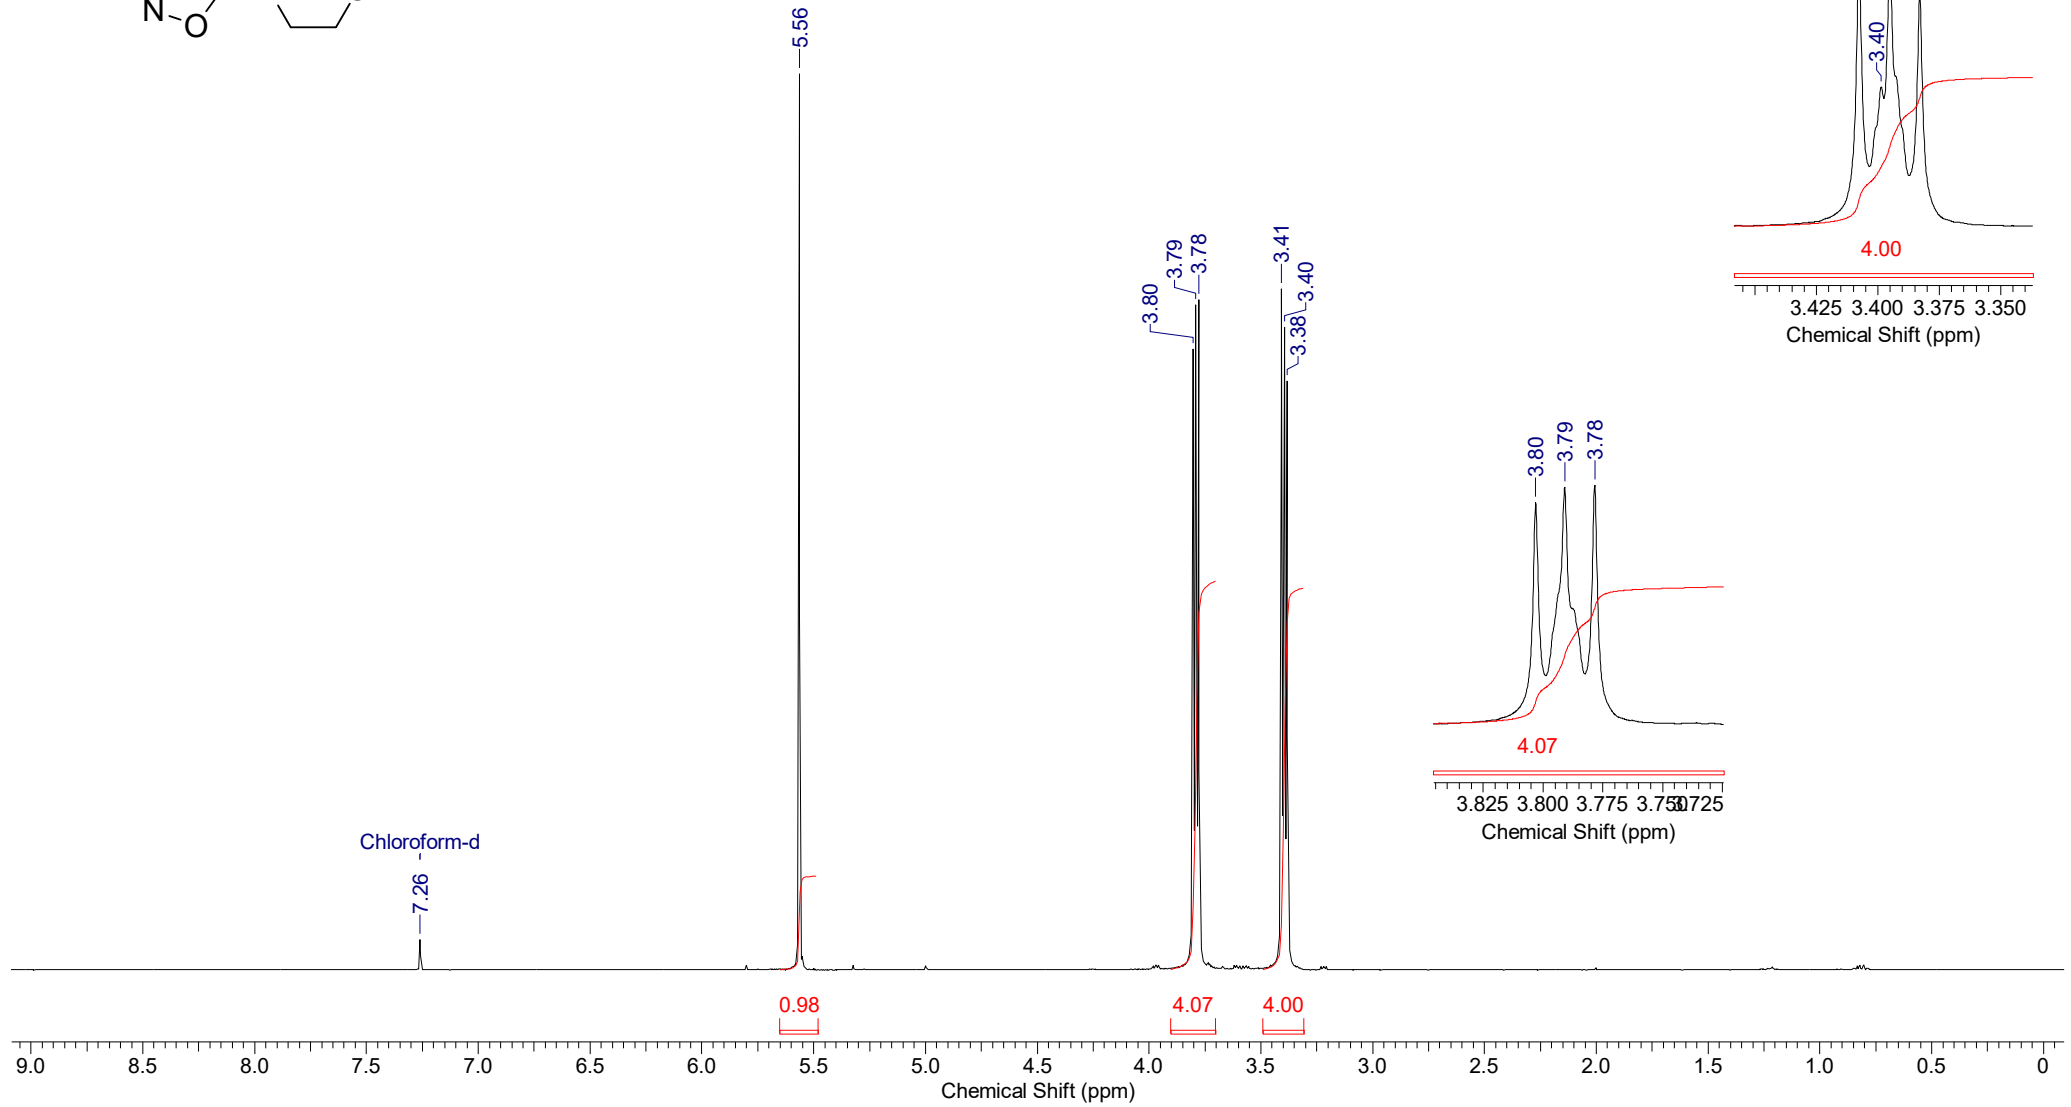

# 4-(3-Nitroisoxazol-5-yl)morpholine **2zg** ( $^{13}\text{C}$ NMR)

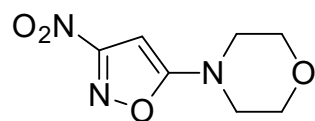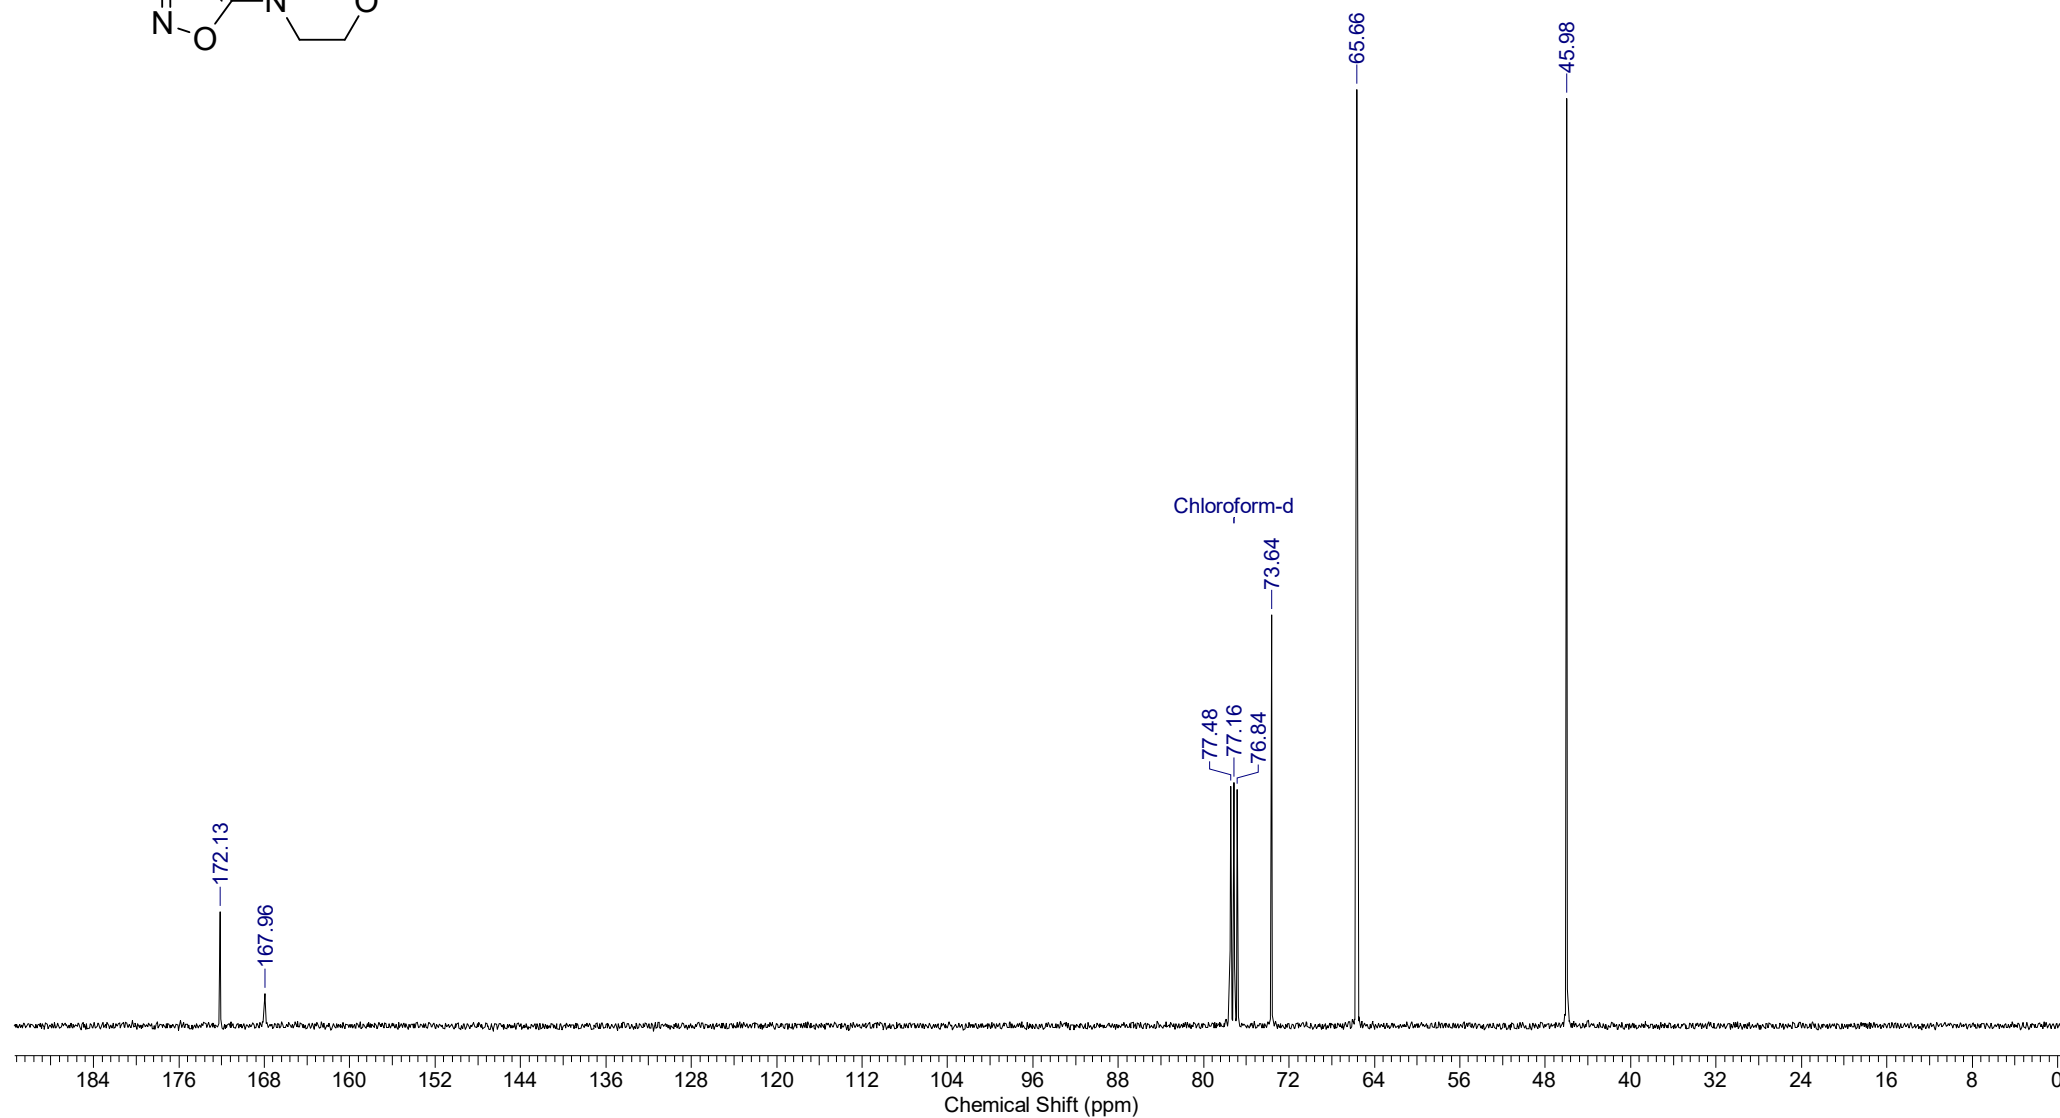

### 3-Nitro-5-phenoxyisoxazole **2zh** (<sup>1</sup>H NMR)

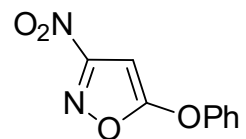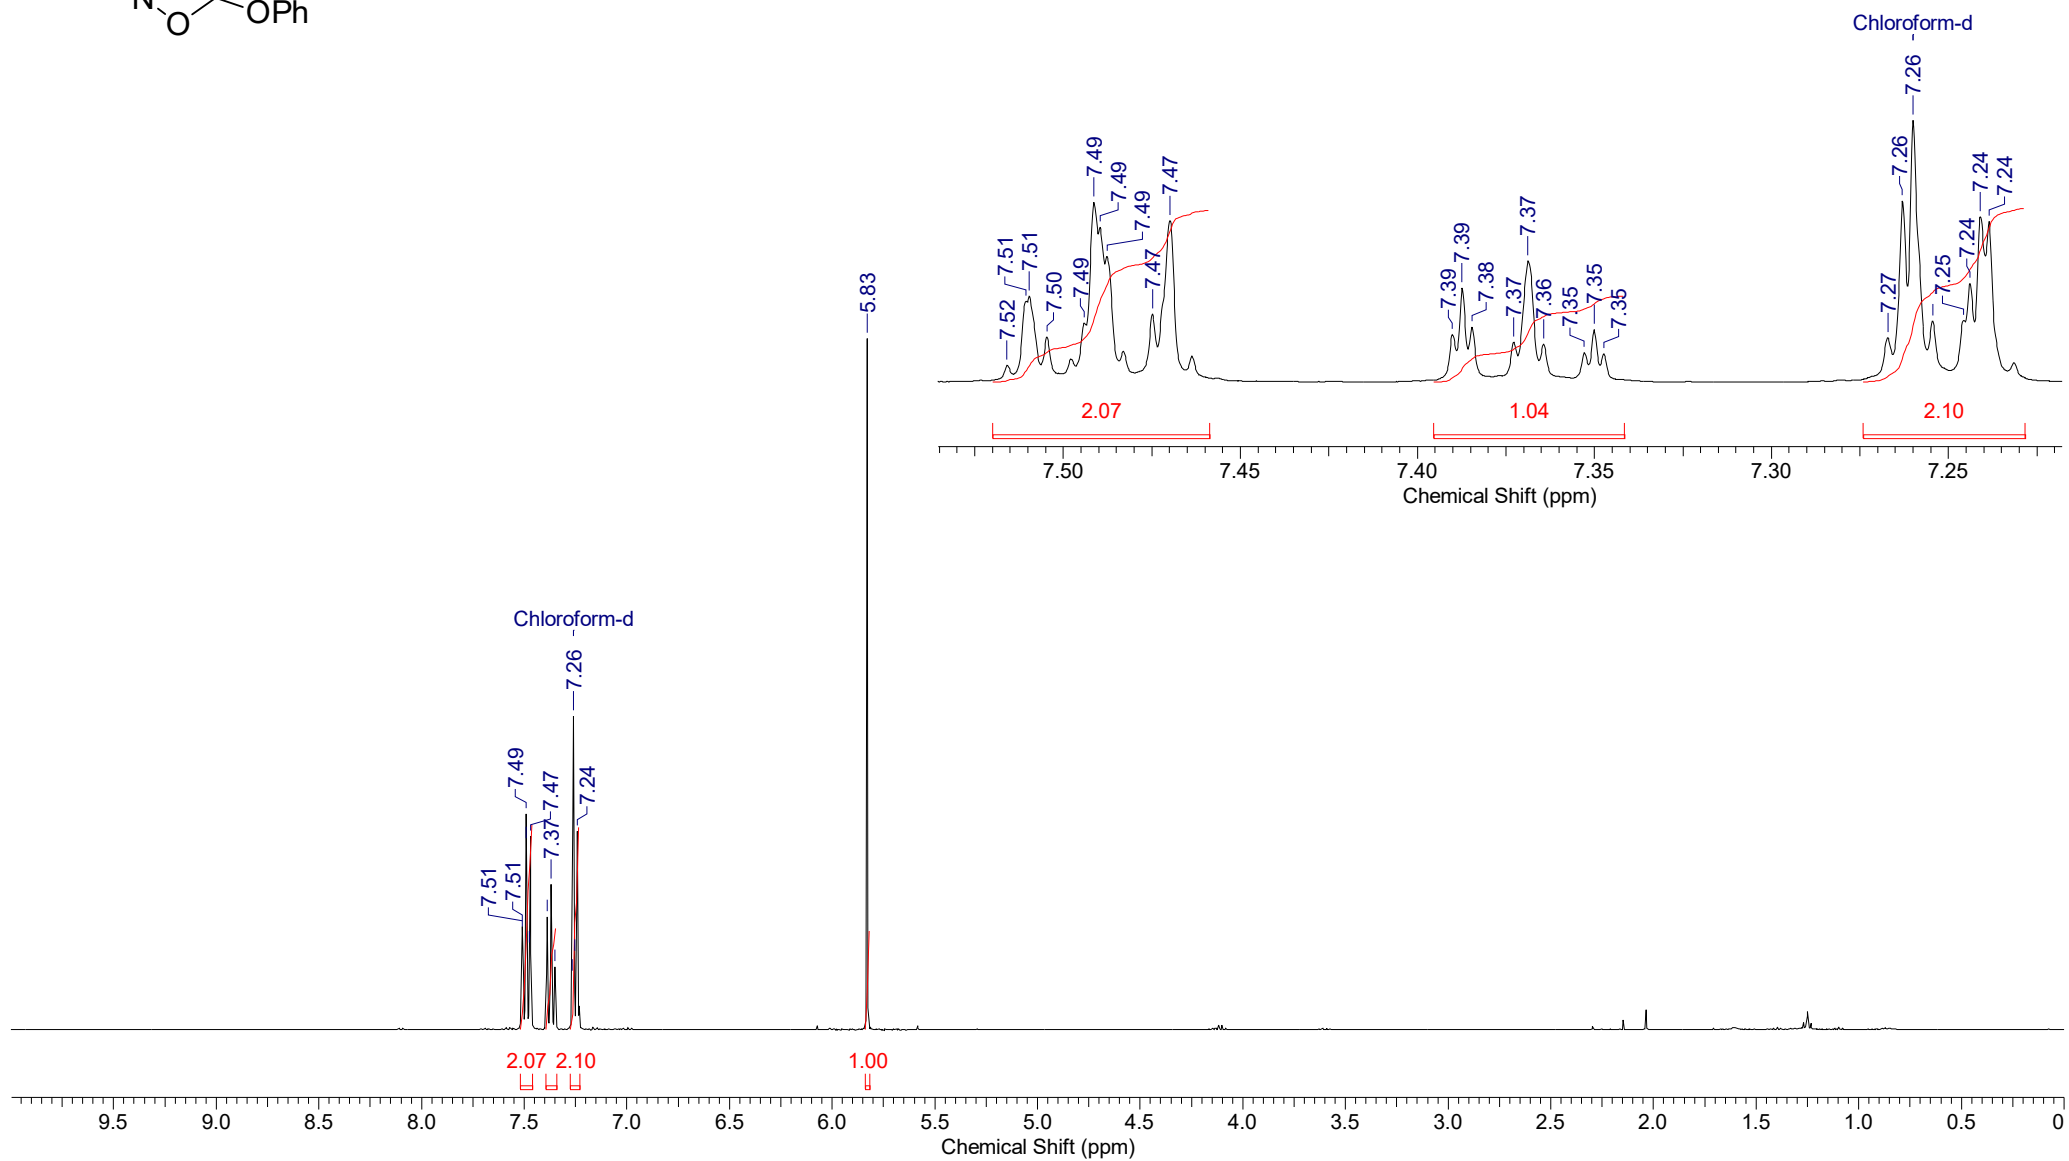

# 3-Nitro-5-phenoxyisoxazole **2zh** ( $^{13}\text{C}$ NMR)

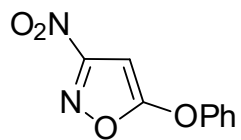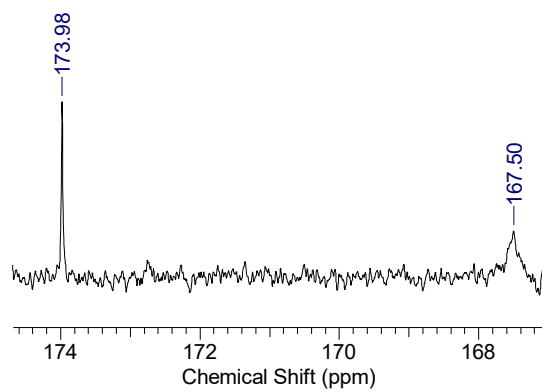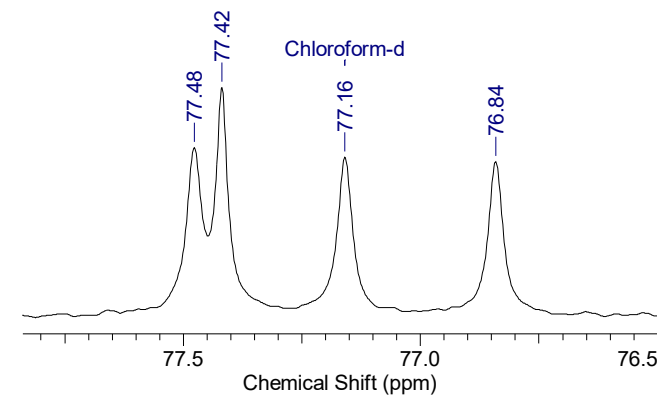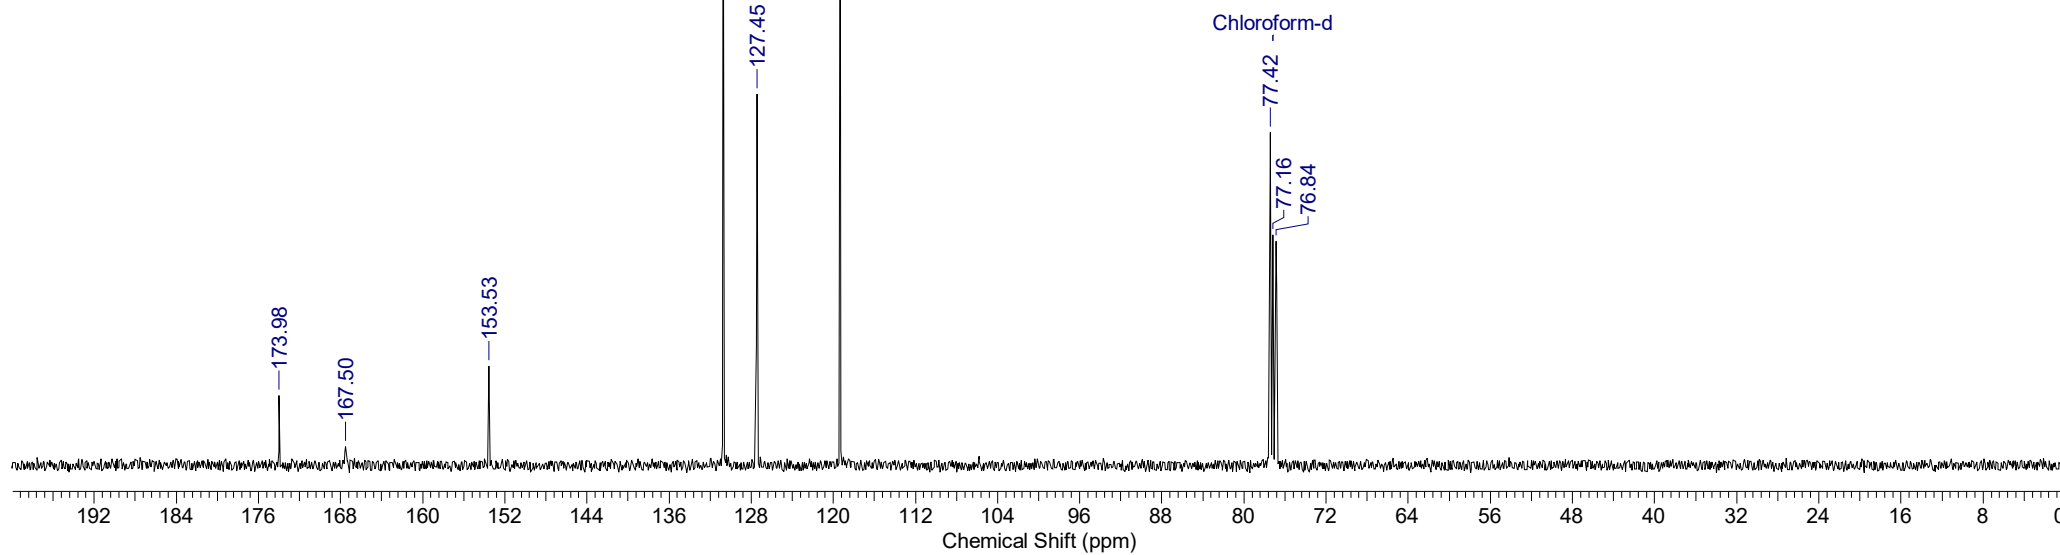

### 3-Nitro-5-(phenylsulfanyl)isoxazole **2zi** ( $^1\text{H}$ NMR)

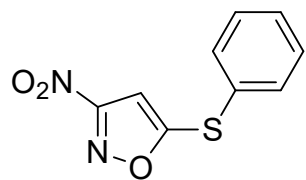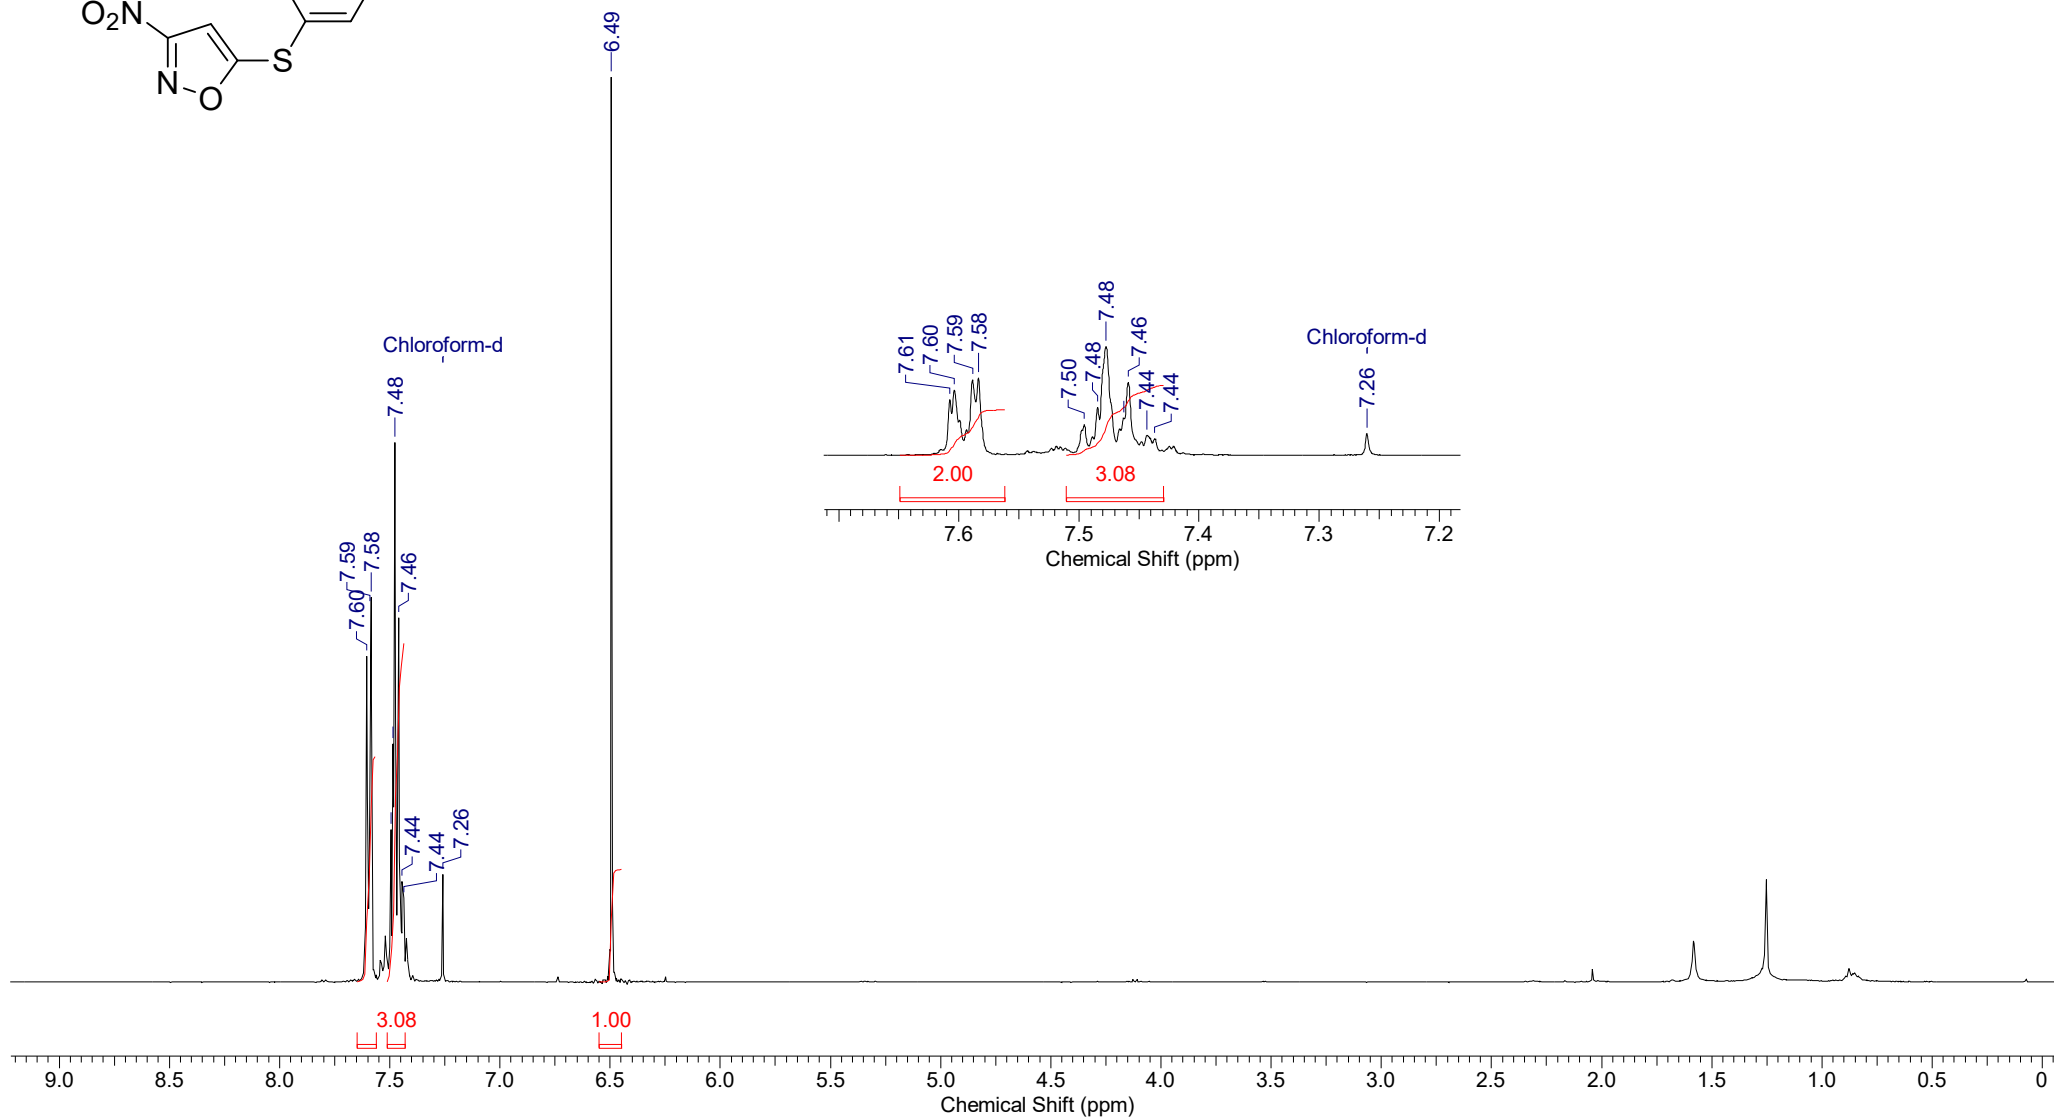

### 3-Nitro-5-(phenylsulfanyl)isoxazole **2zi** ( $^{13}\text{C}$ NMR)

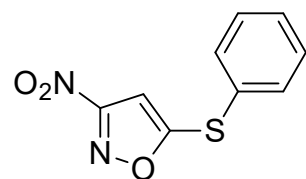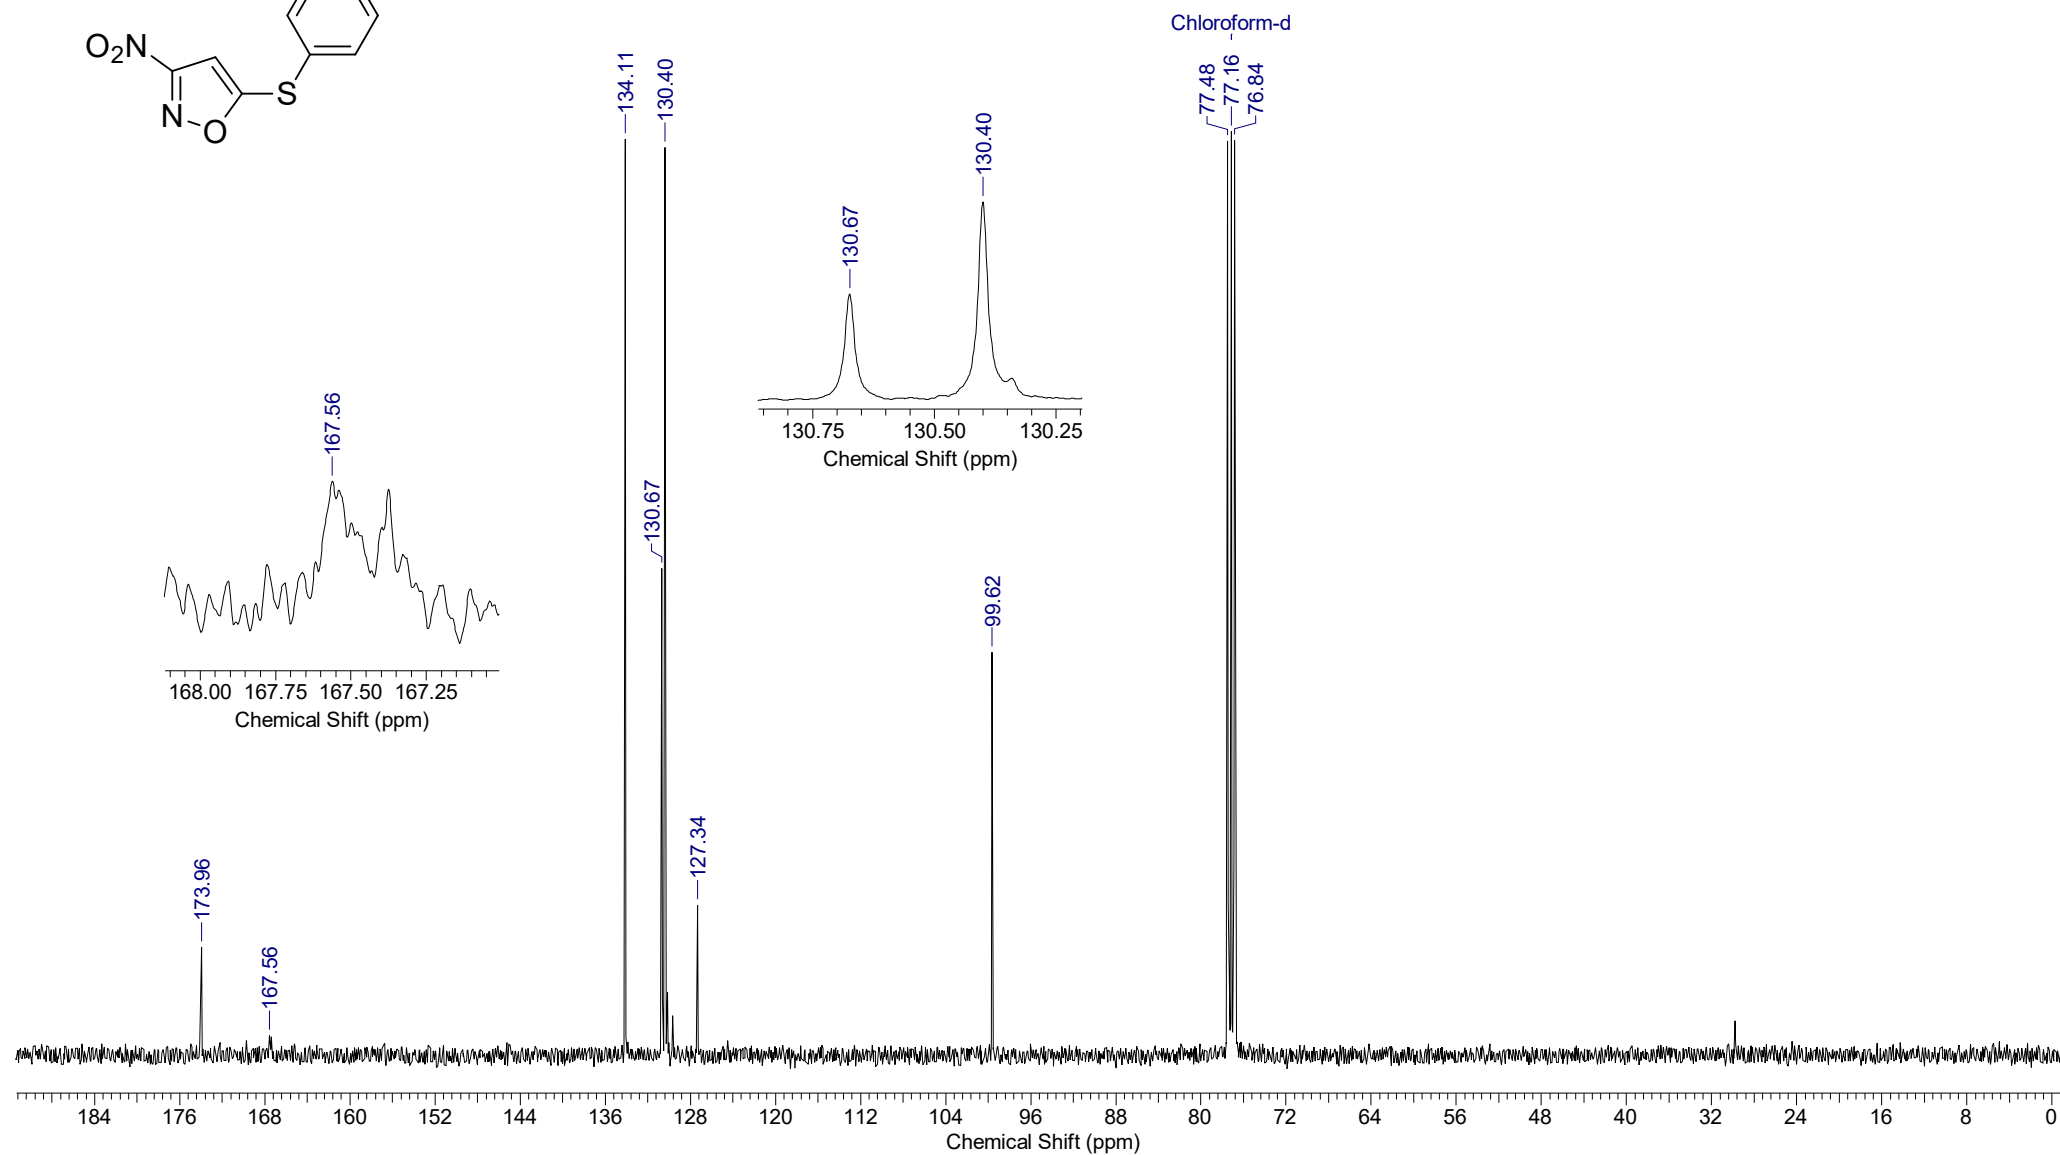

# 4-(3,4-Dinitroisoxazol-5-yl)morpholine **3** ( $^1\text{H}$ NMR)

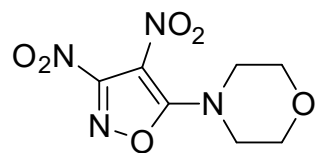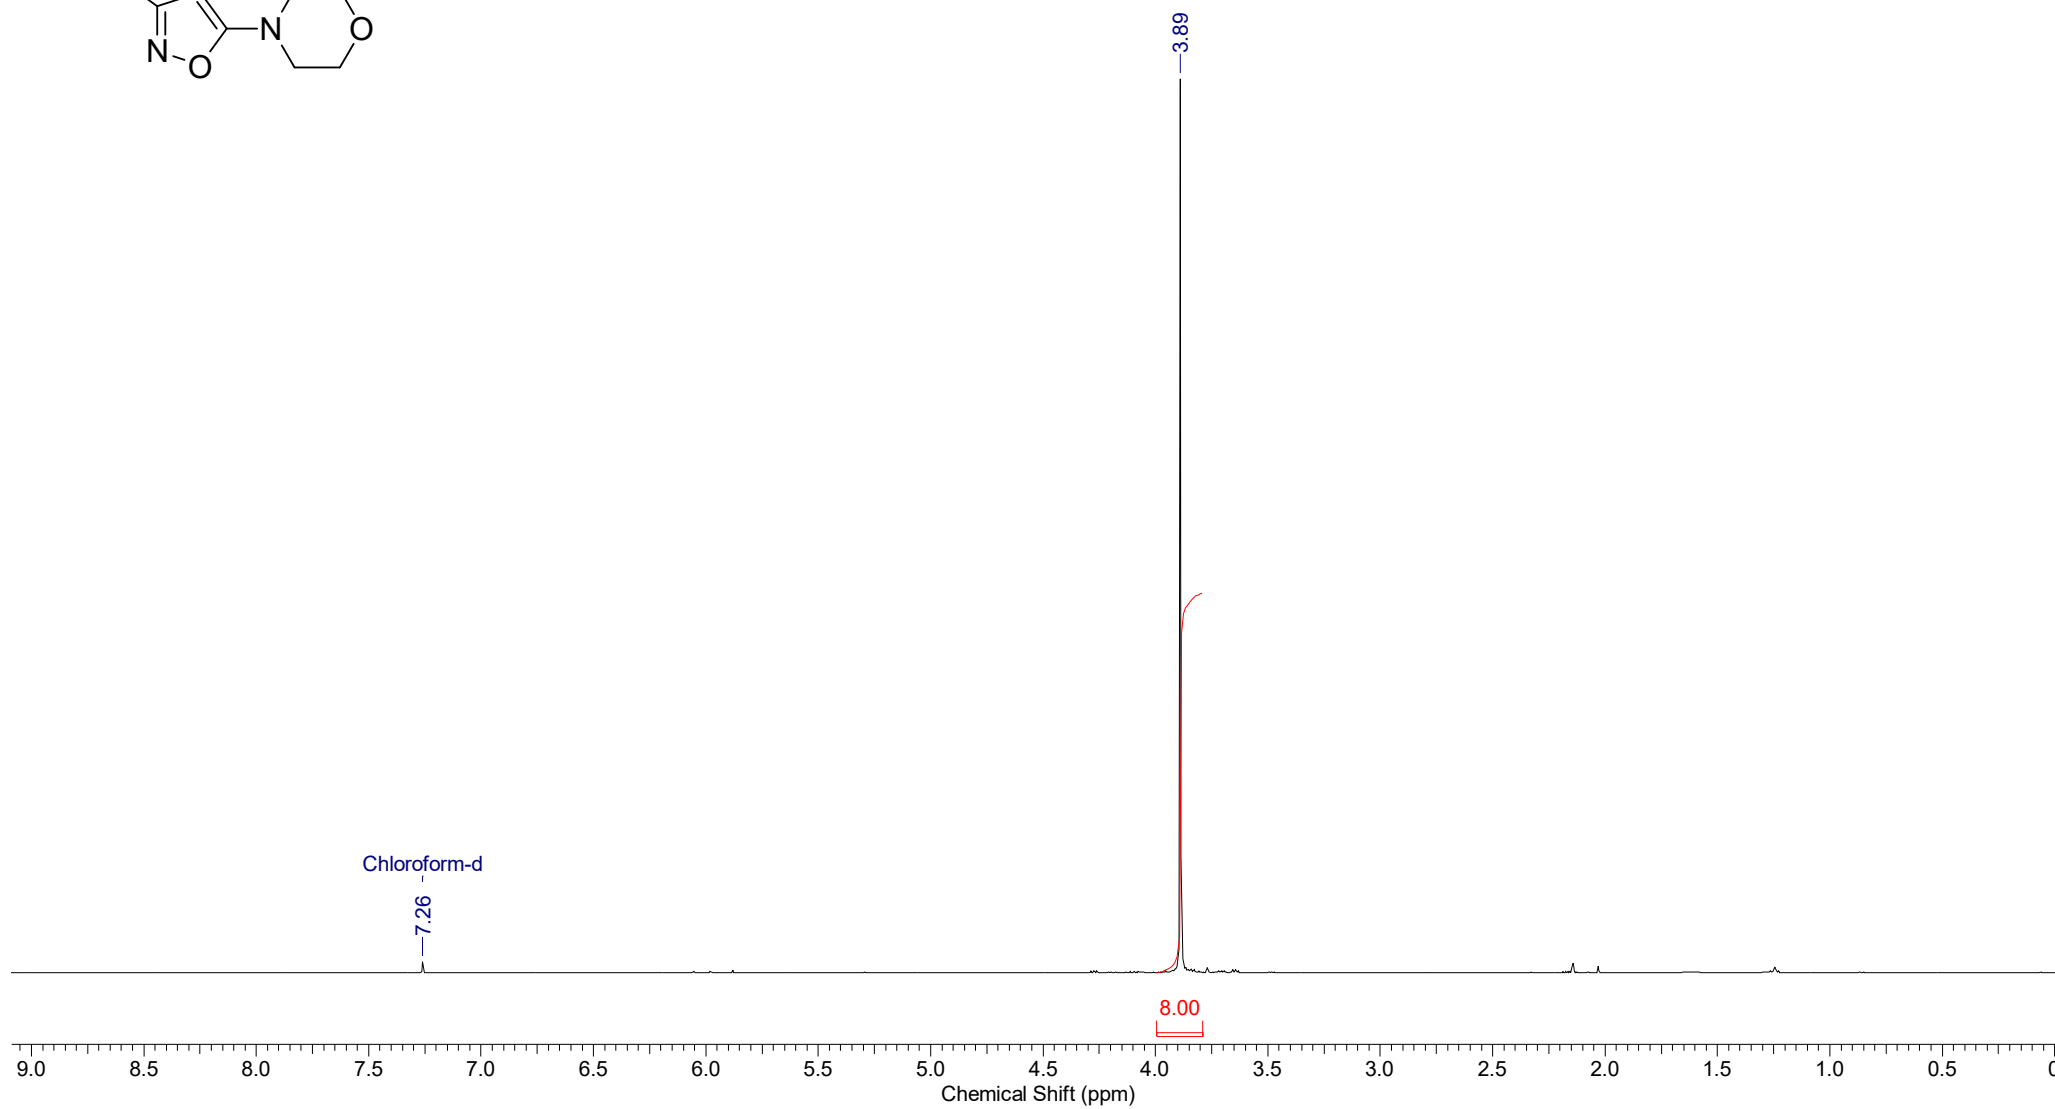

# 4-(3,4-Dinitroisoxazol-5-yl)morpholine **3** ( $^{13}\text{C}$ NMR)

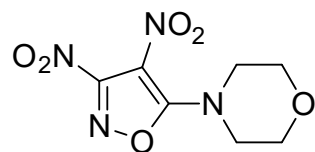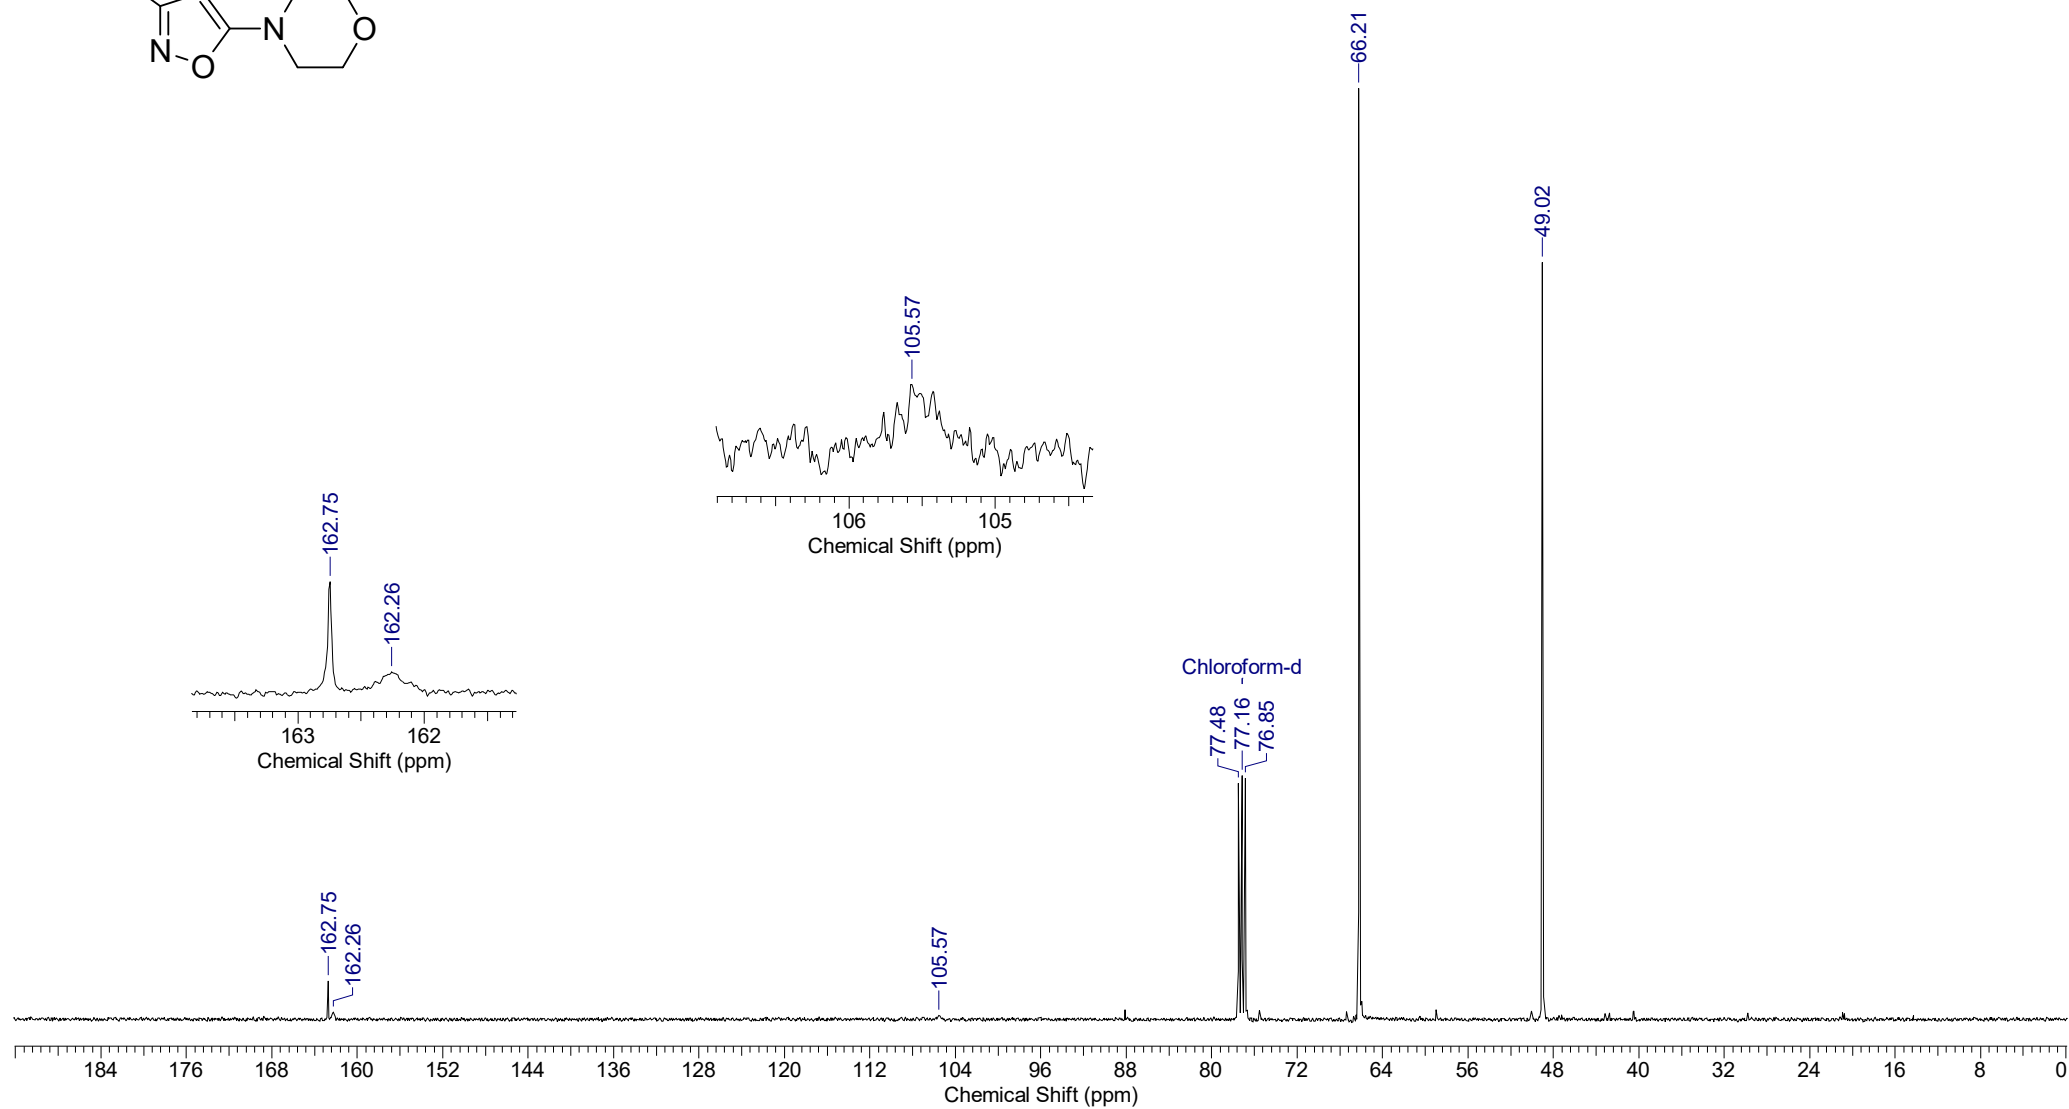



# 4-(3-Fluoro-4-nitroisoxazol-5-yl)morpholine **4a** ( $^1\text{H}$ NMR)

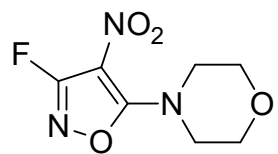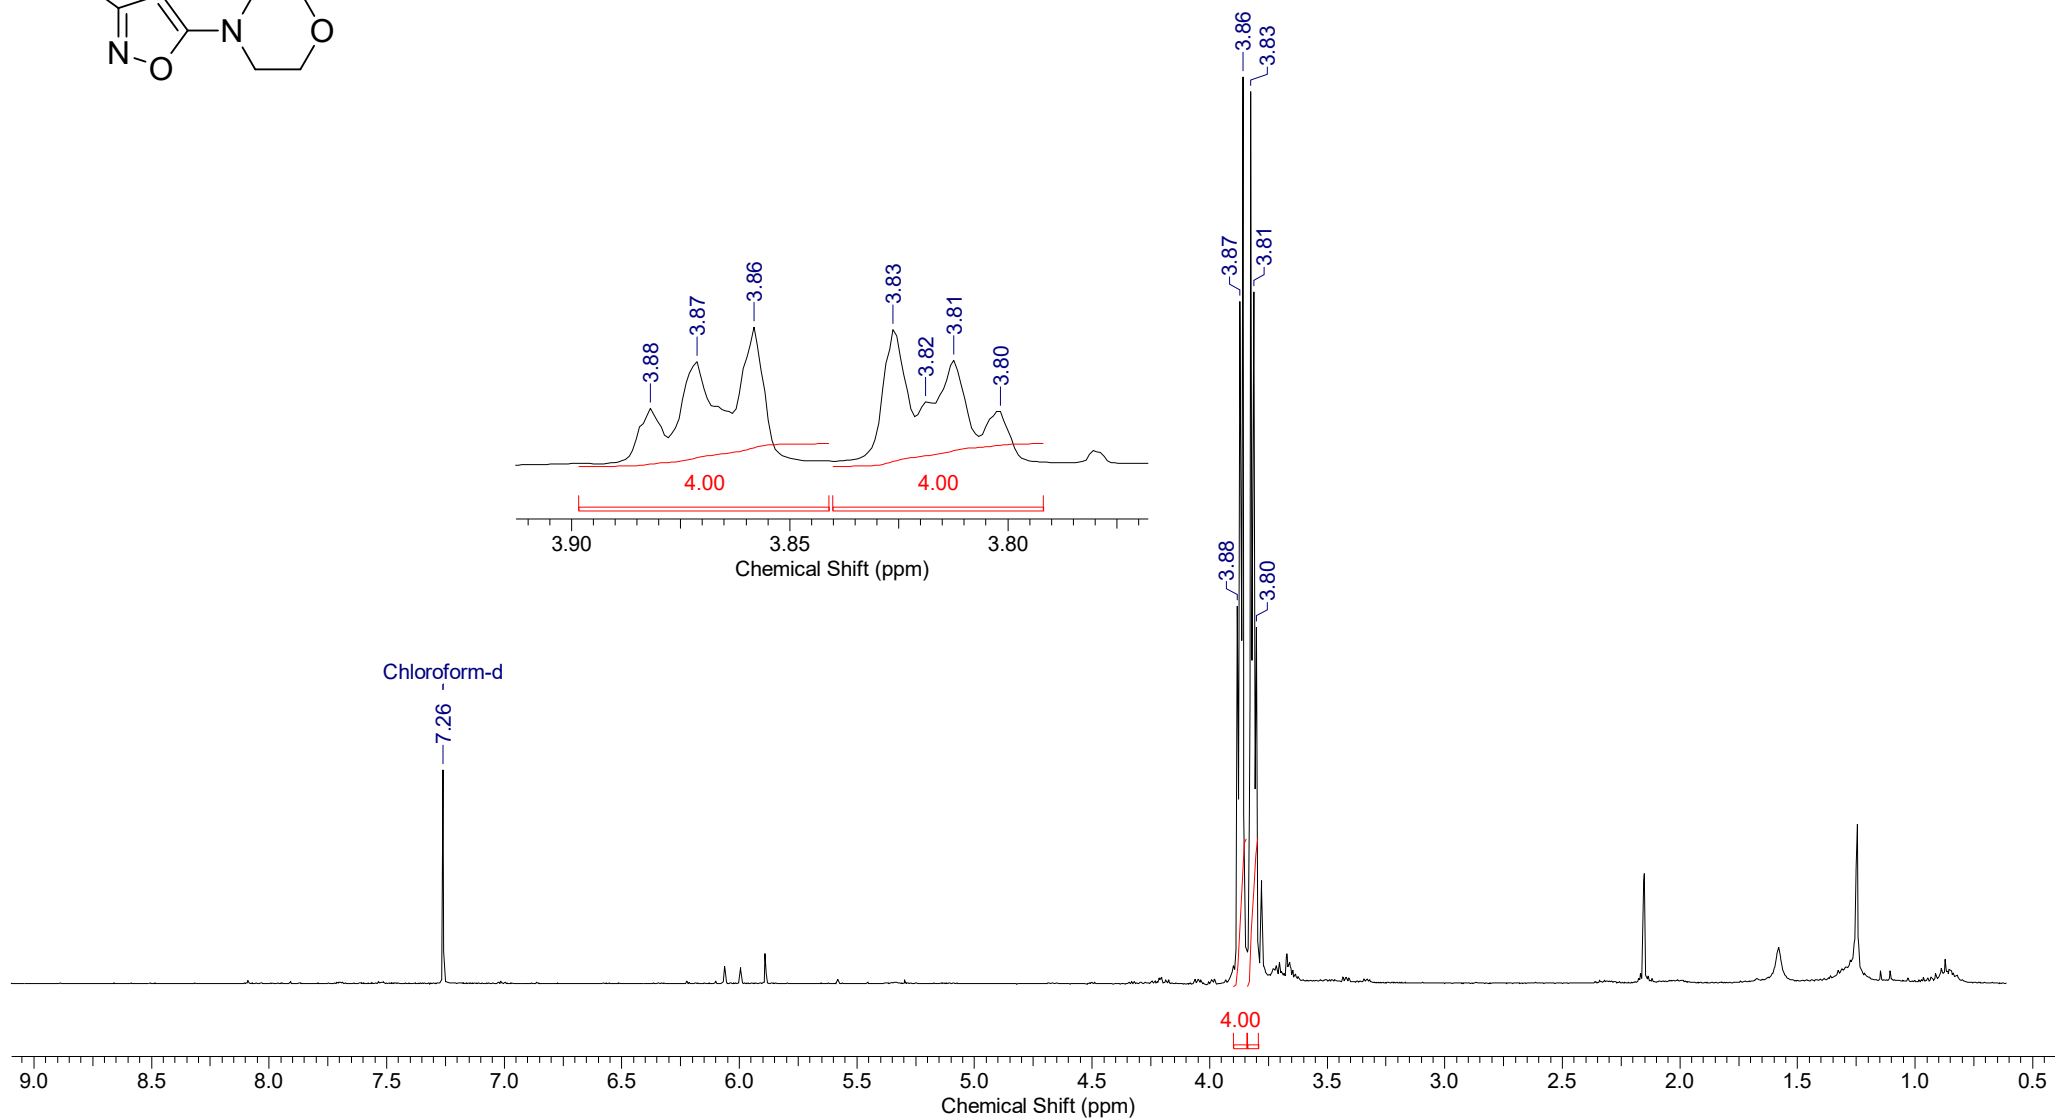

# 4-(3-Fluoro-4-nitroisoxazol-5-yl)morpholine **4a** ( $^{13}\text{C}$ NMR)

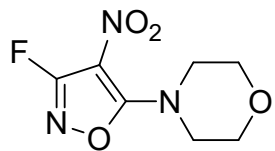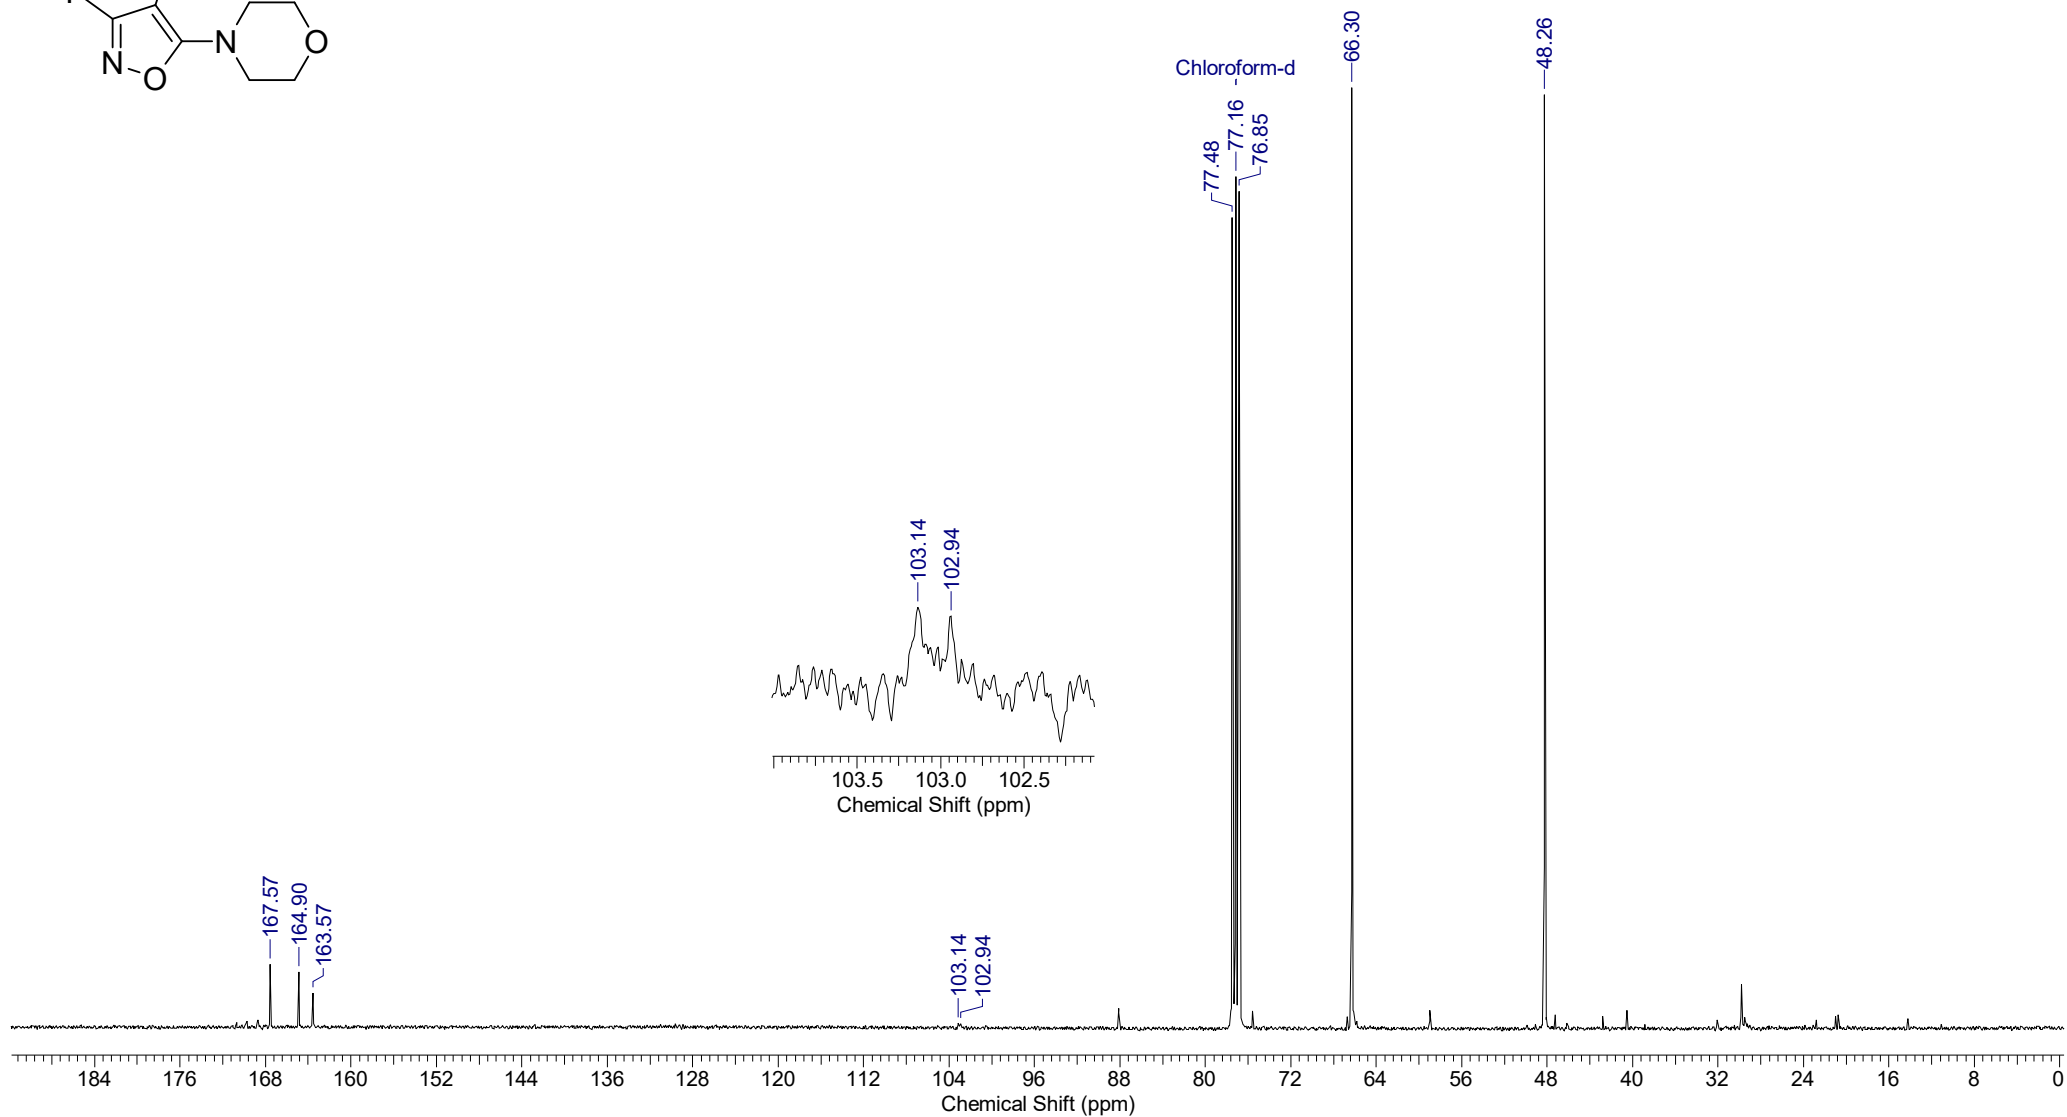

4-(3-Fluoro-4-nitroisoxazol-5-yl)morpholine **4a** ( $^{19}\text{F}$  NMR)

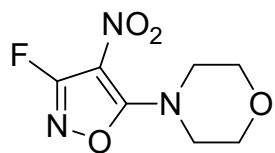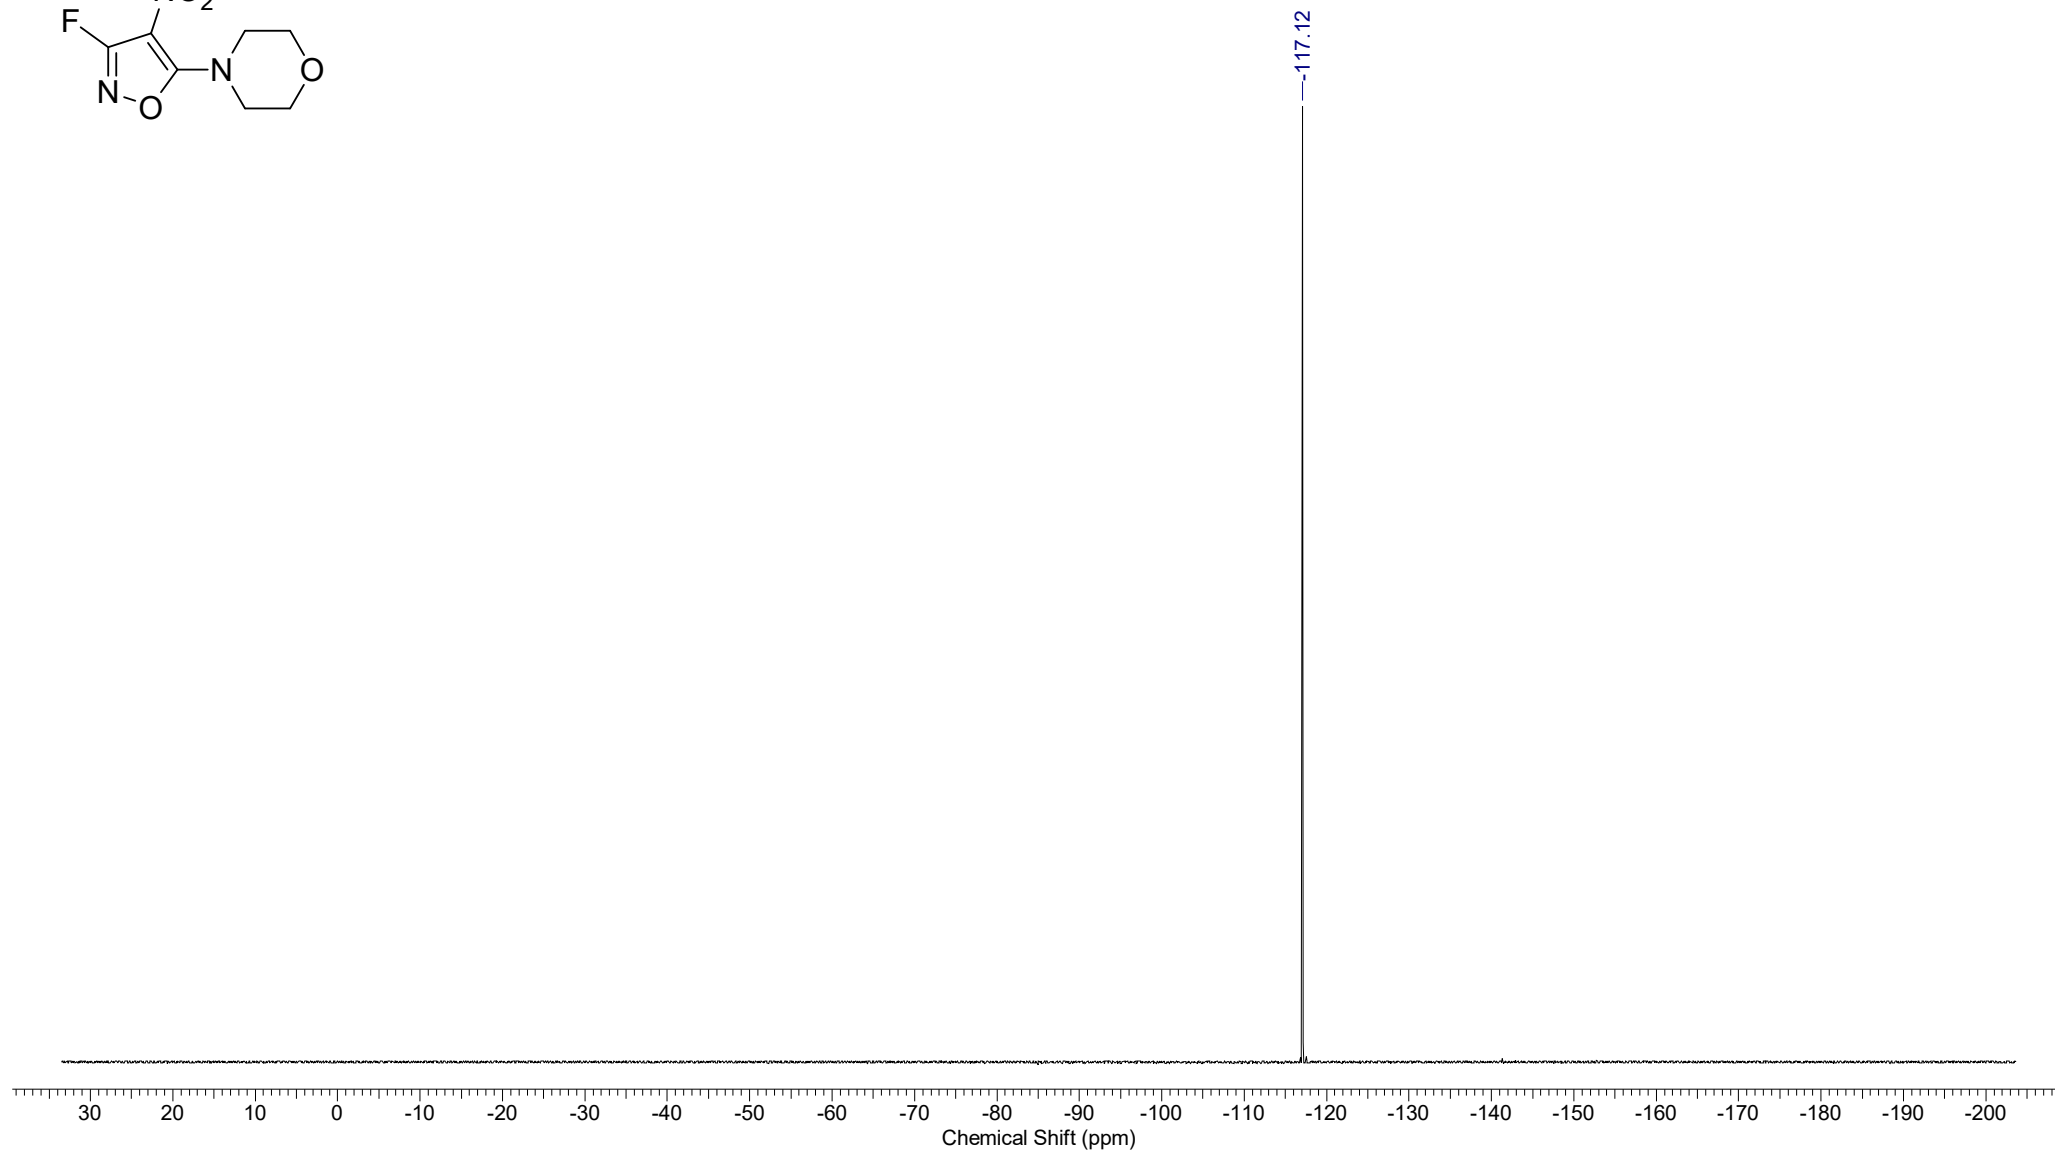

# 4-(4-Nitro-3-phenoxyisoxazol-5-yl)morpholine **4b** ( $^1\text{H}$ NMR)

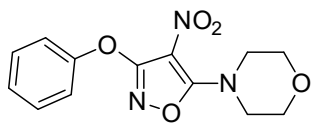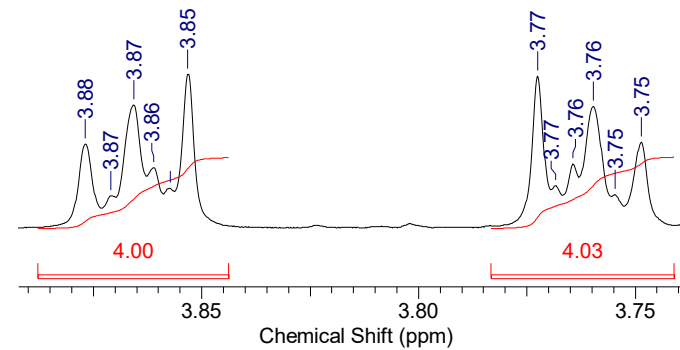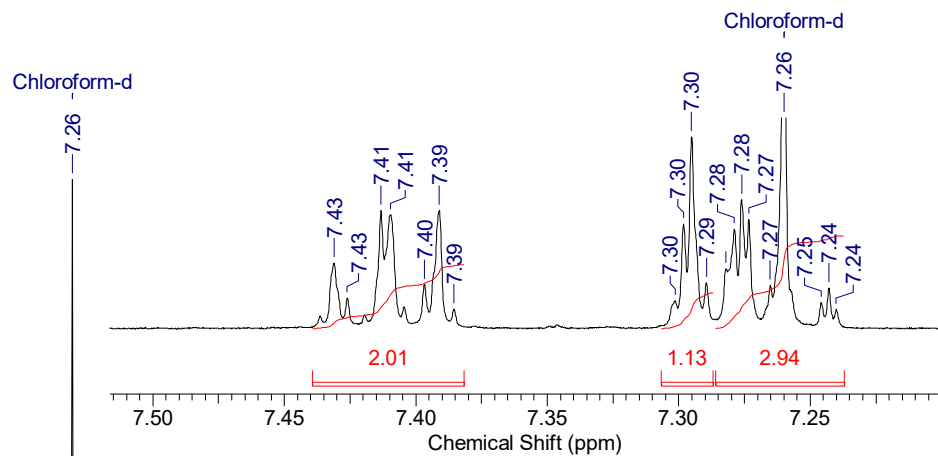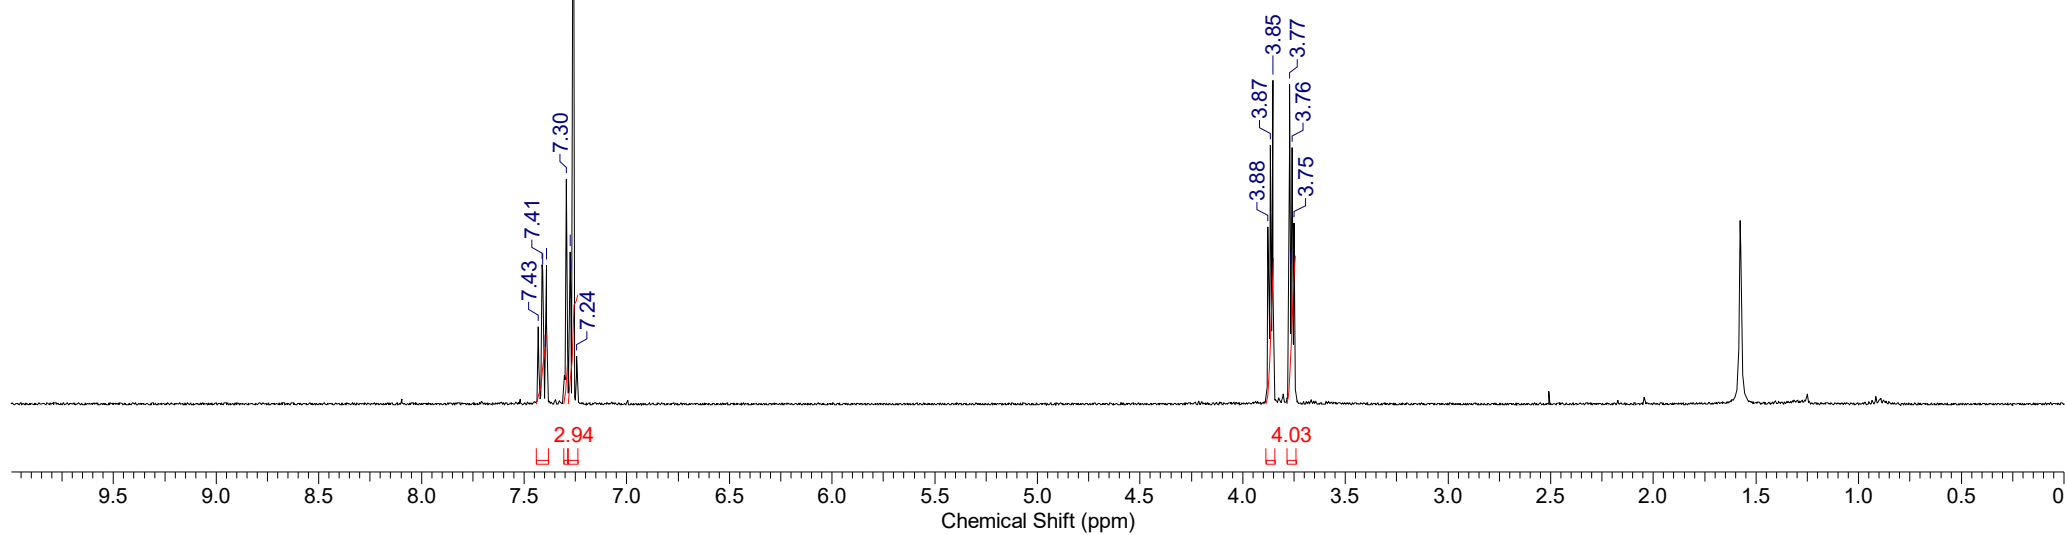

# 4-(4-Nitro-3-phenoxyisoxazol-5-yl)morpholine **4b** ( $^{13}\text{C}$ NMR)

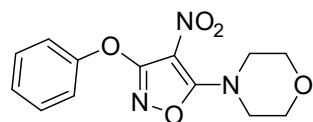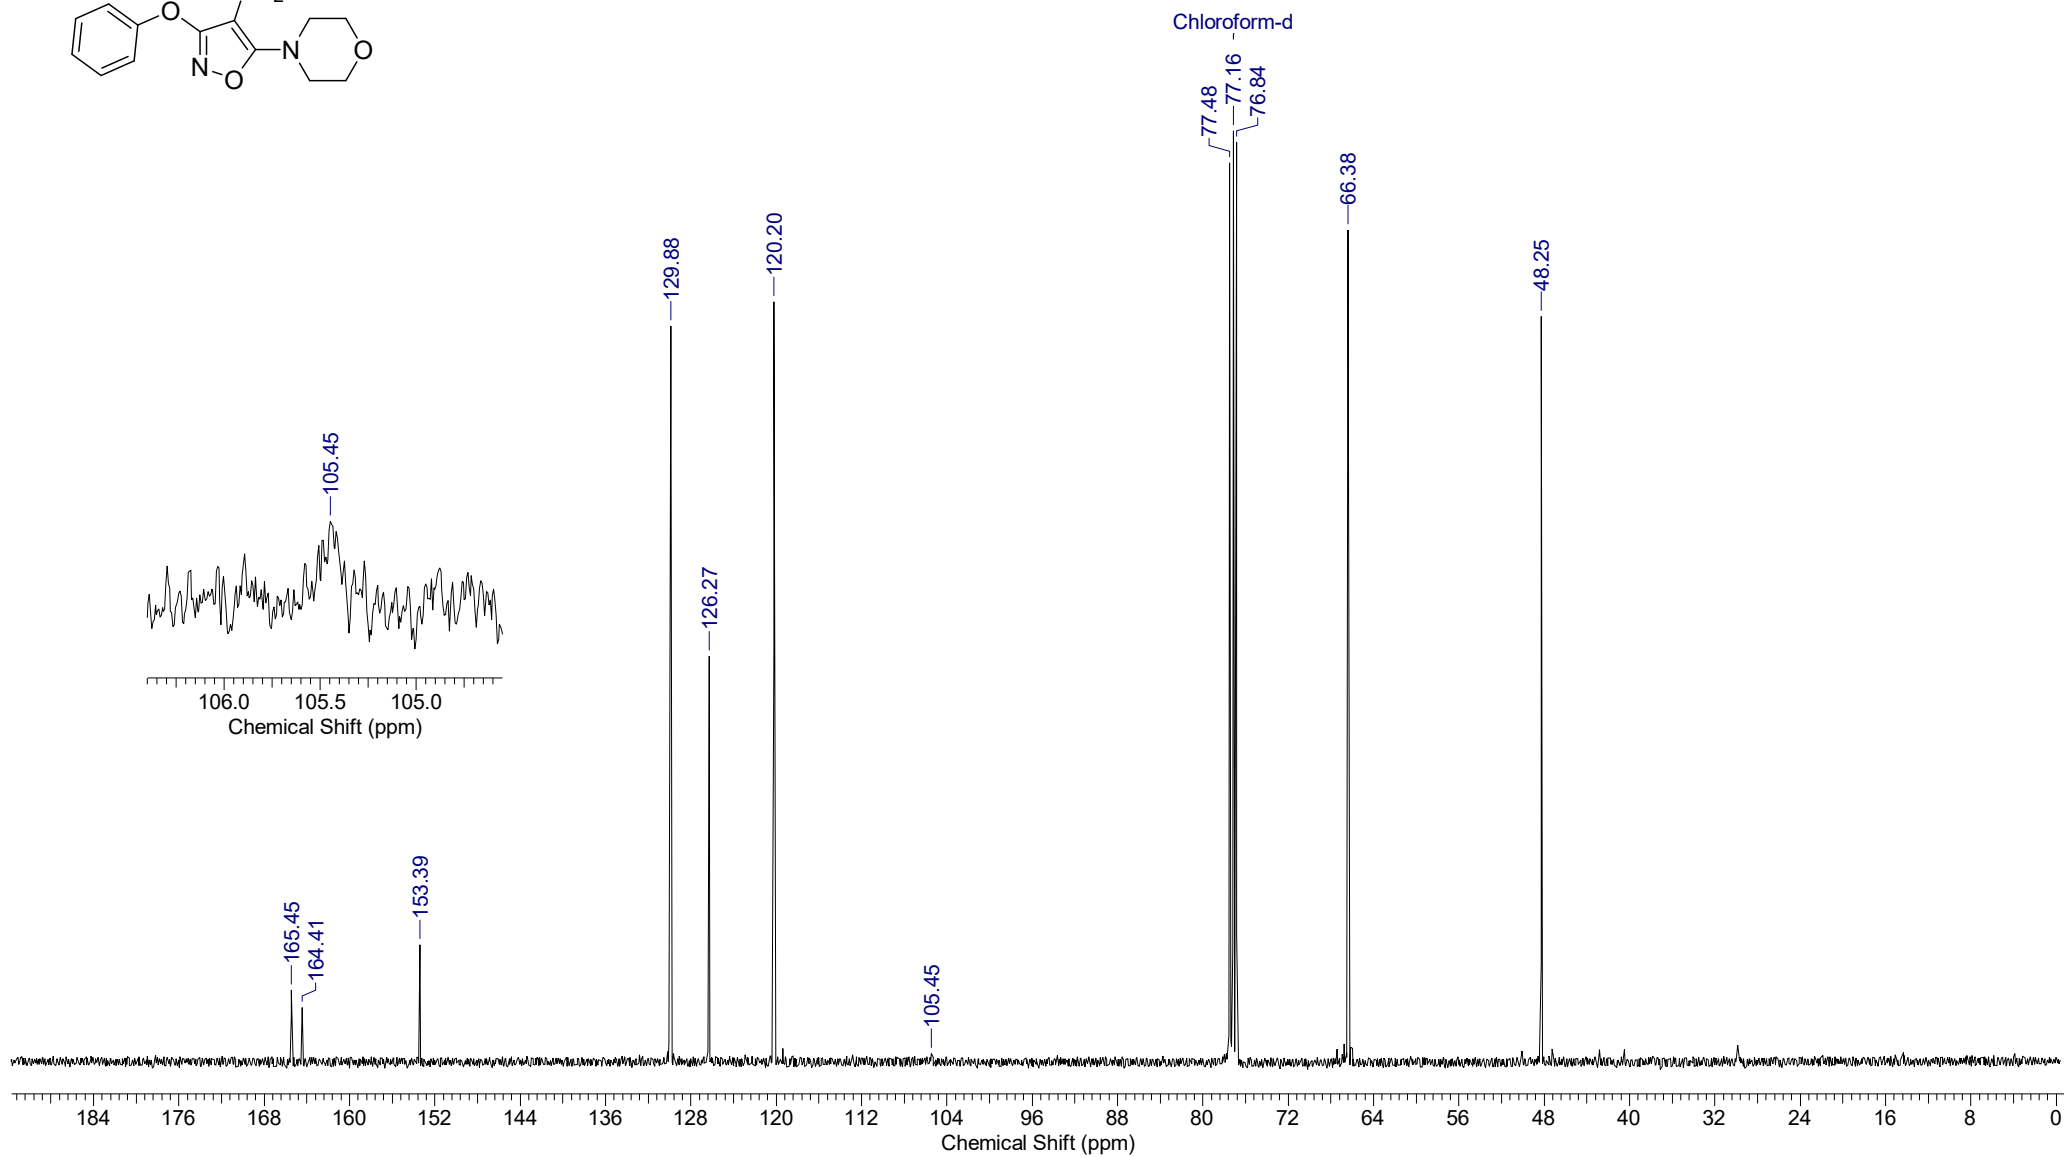



*N*-Benzyl-5-morpholin-4-yl-4-nitroisoxazole-3-amine **4c** ( $^{13}\text{C}$  NMR)

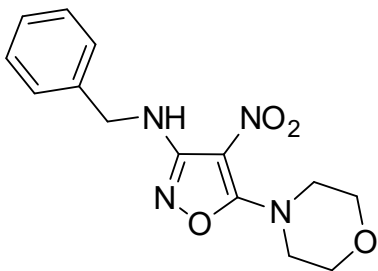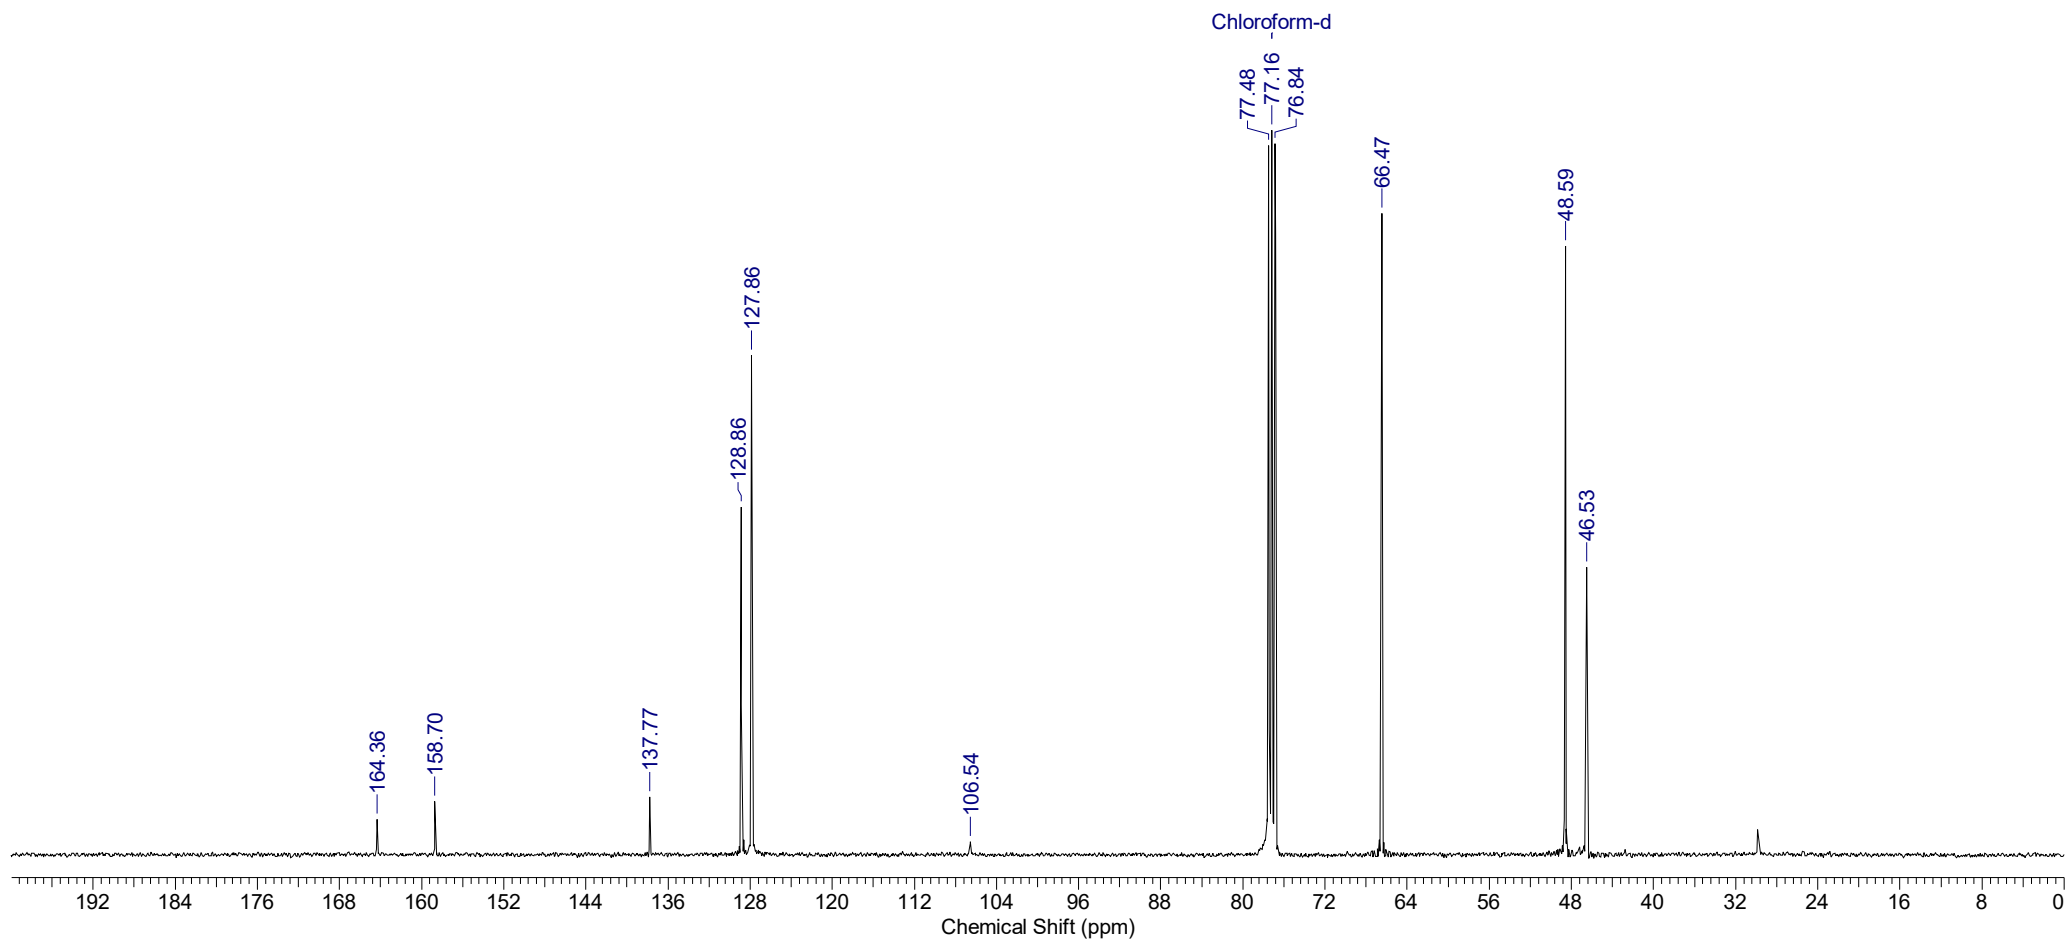

# Methyl 4-bromo-5-morpholinoisoxazole-3-carboxylate **5** ( $^1\text{H}$ NMR)

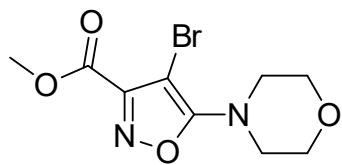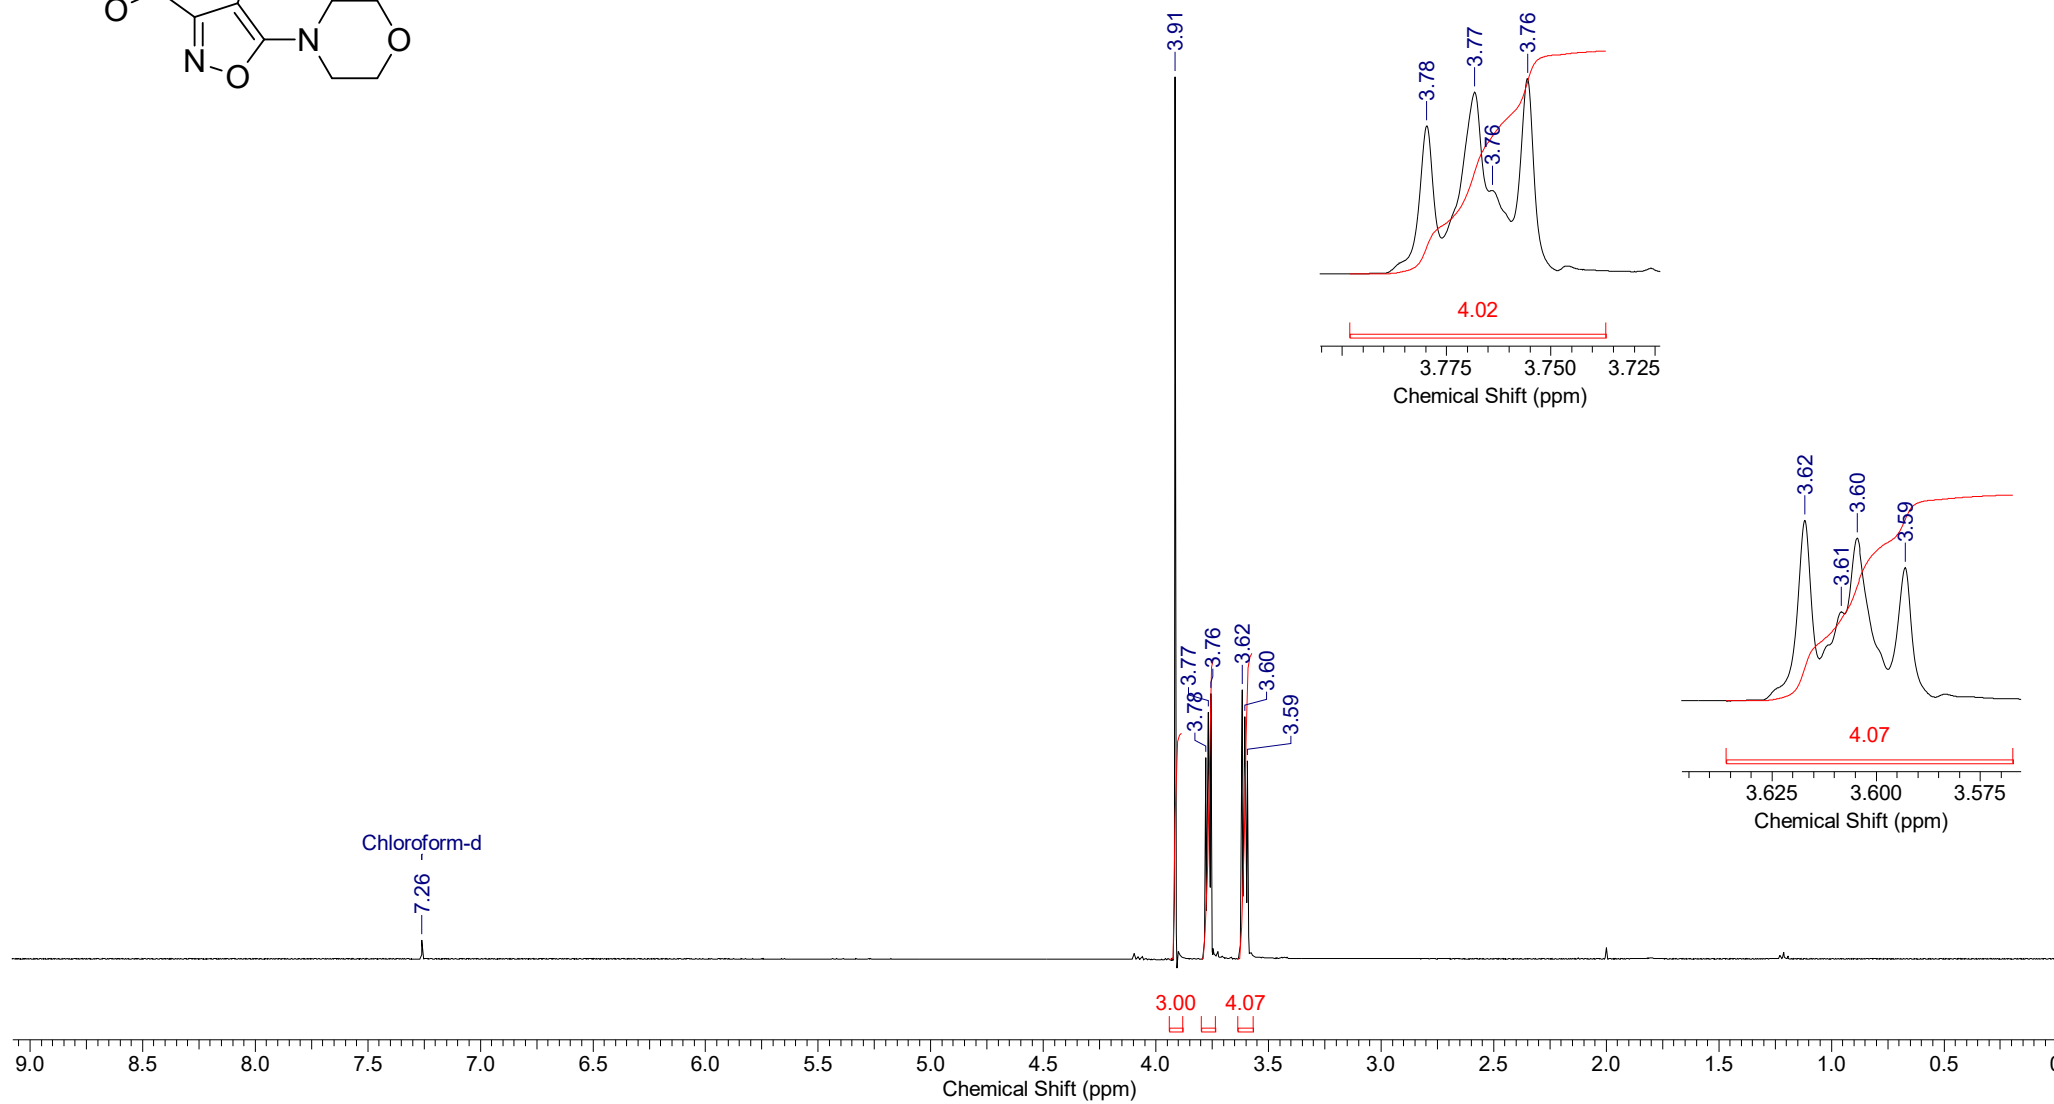



# Methyl 4-bromo-5-morpholinoisoxazole-3-carboxylate **5** ( $^{13}\text{C}$ NMR)

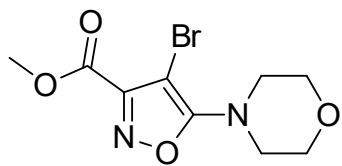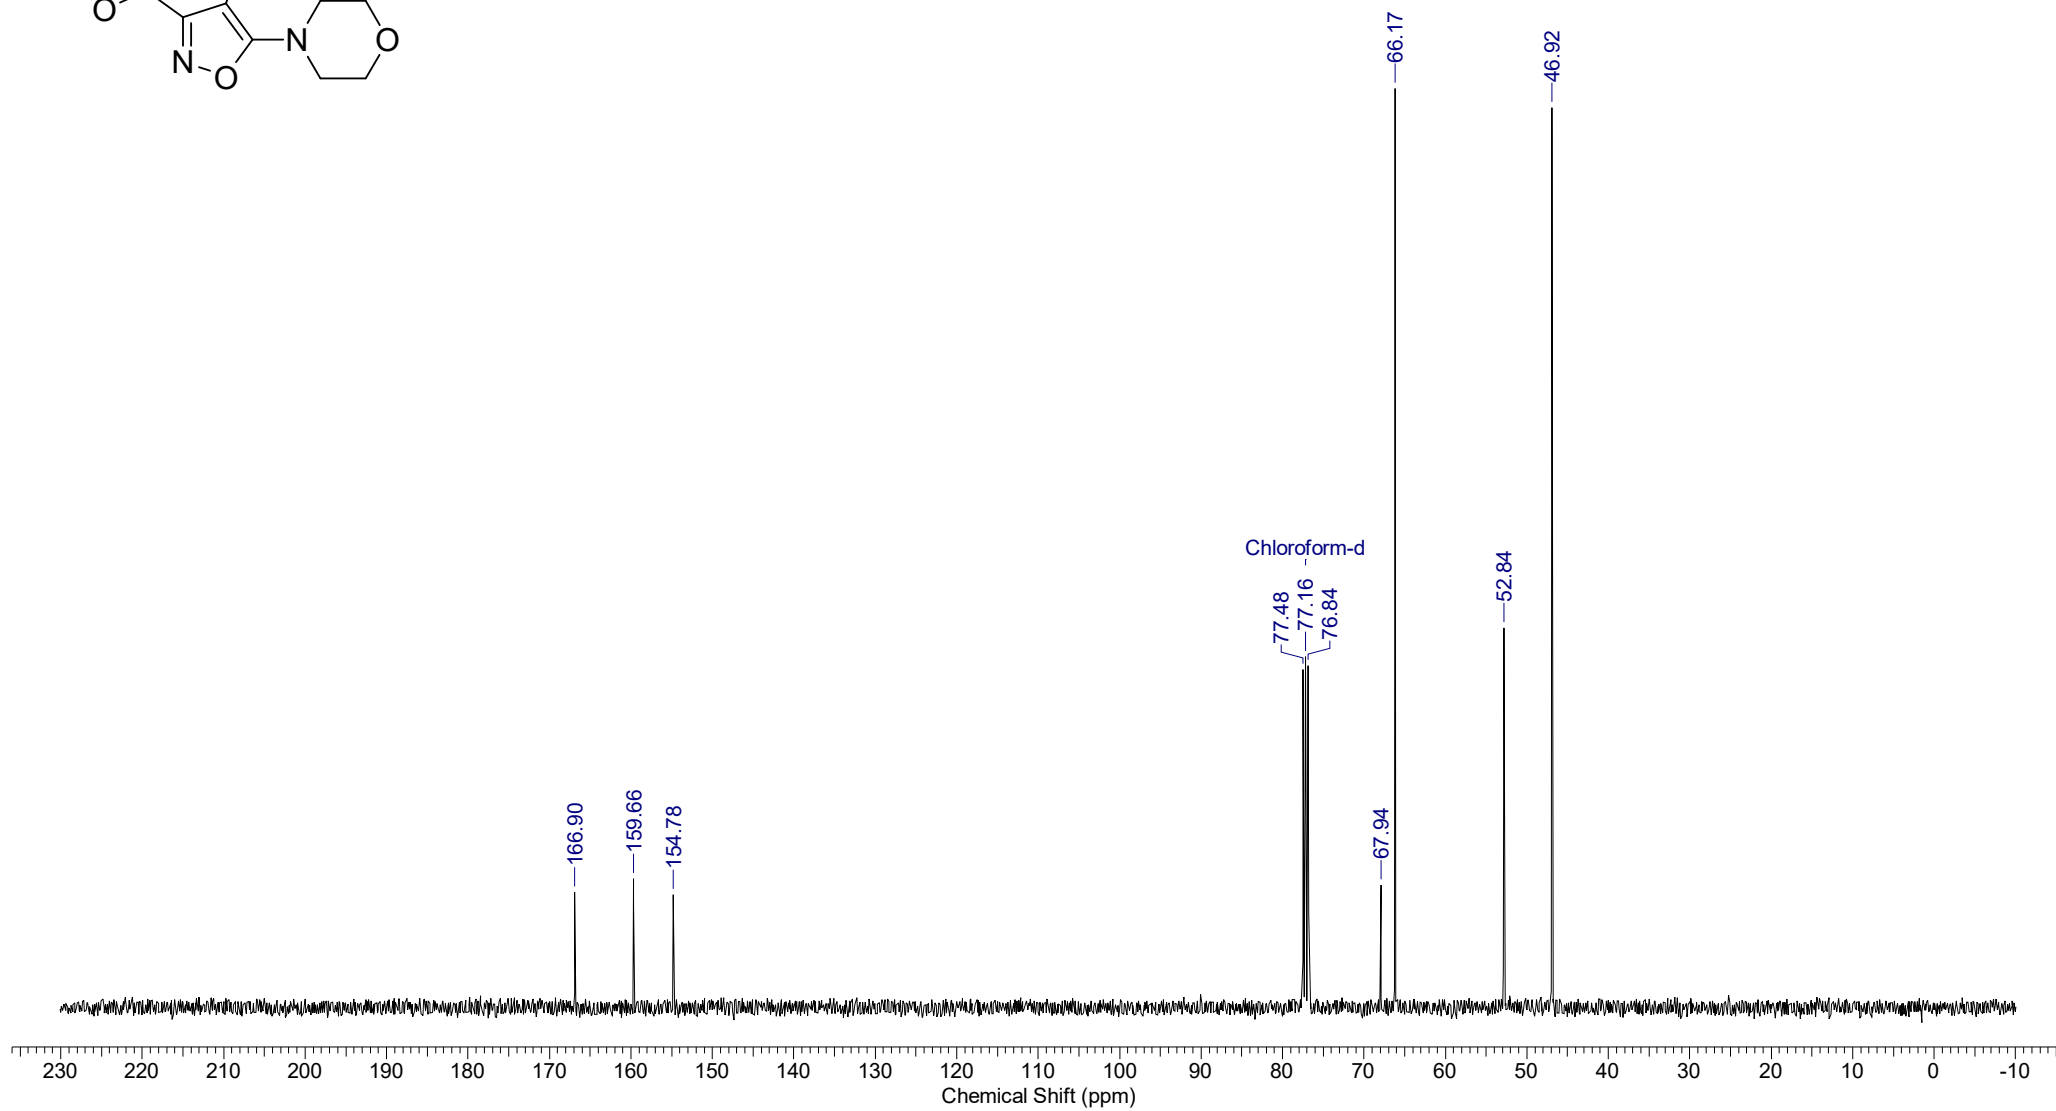

# Methyl 4-bromo-5-morpholinoisoxazole-3-carboxylate **5** (APT)

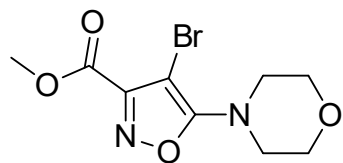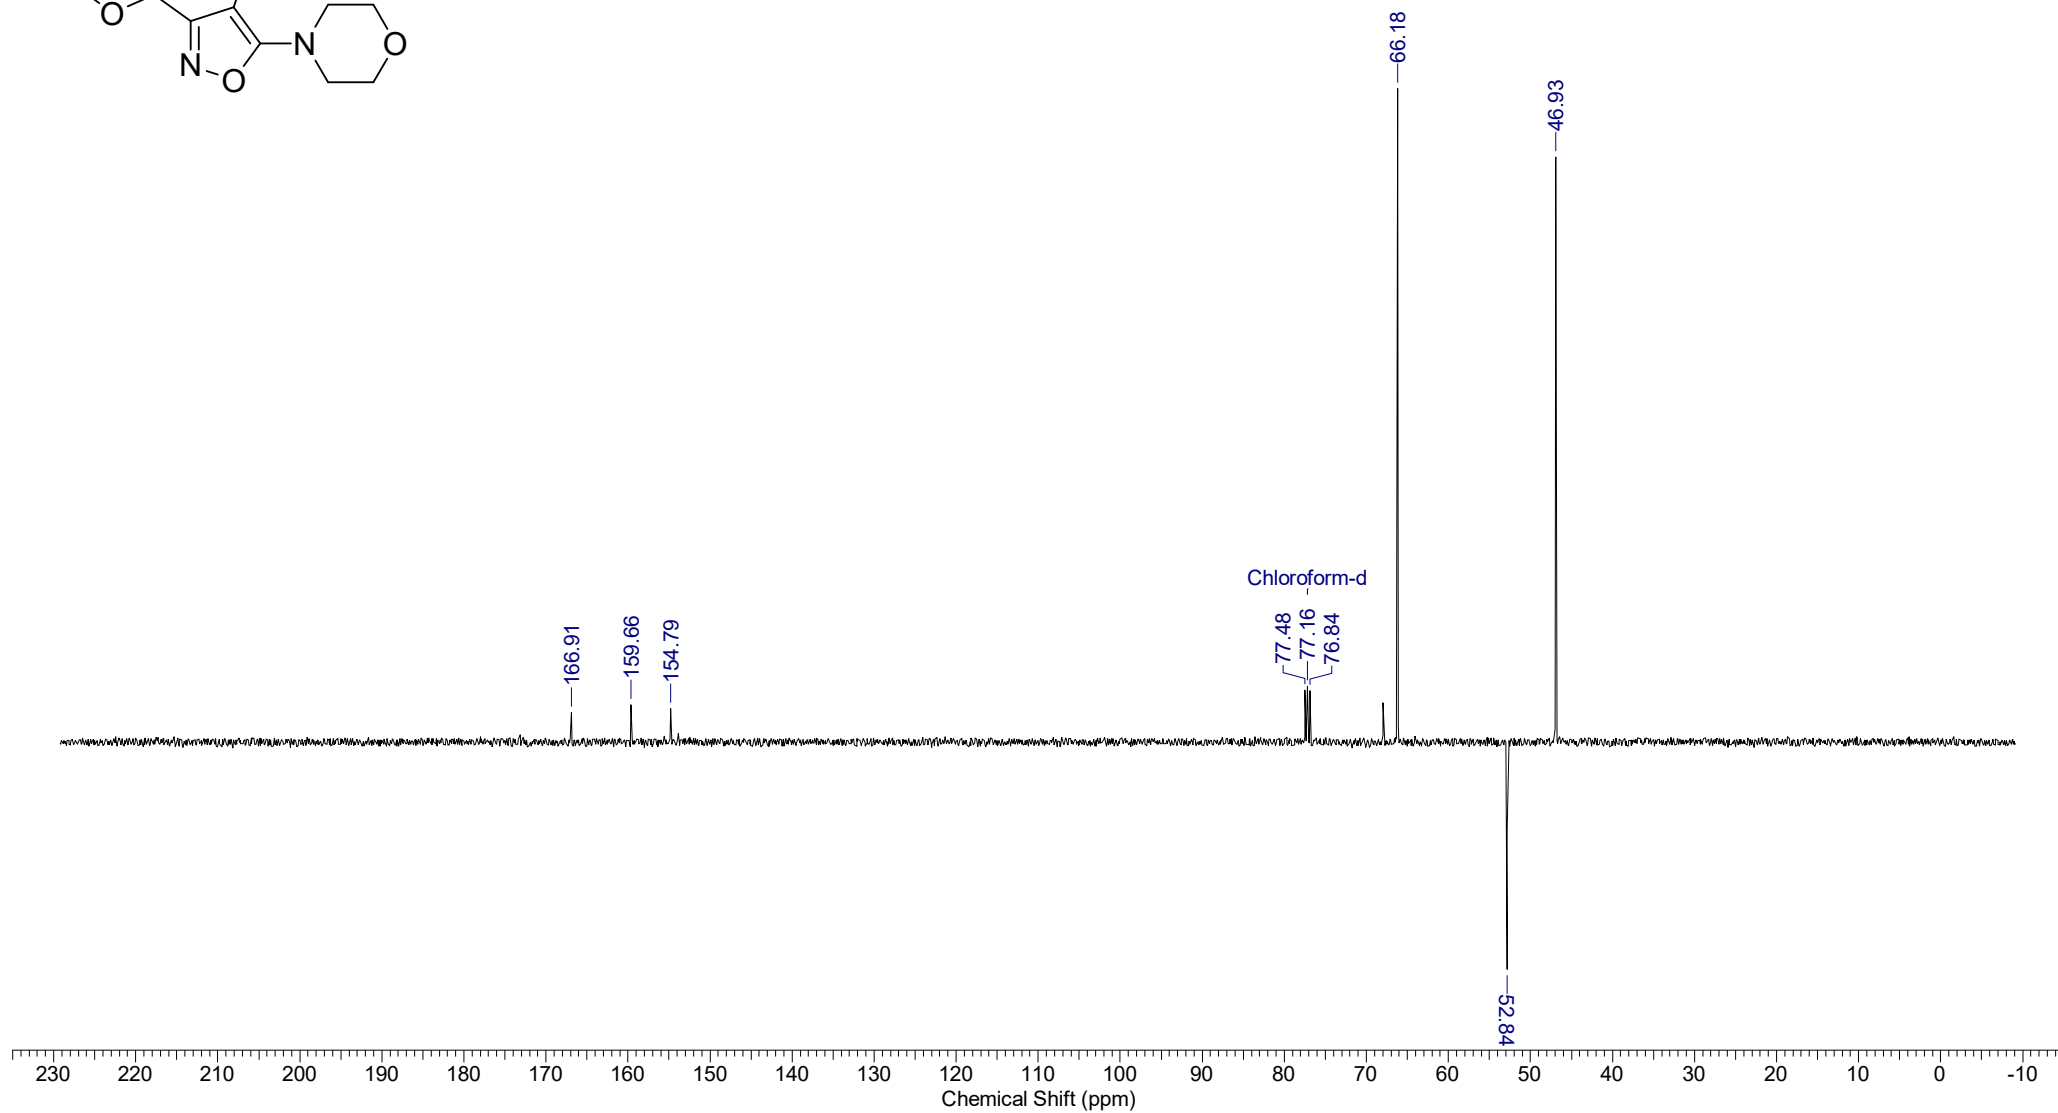



# Methyl 5-morpholino-4-nitroisoxazole-3-carboxylate **6** ( $^{13}\text{C}$ NMR)

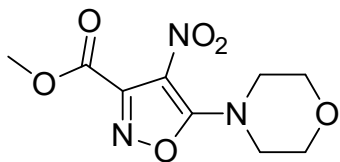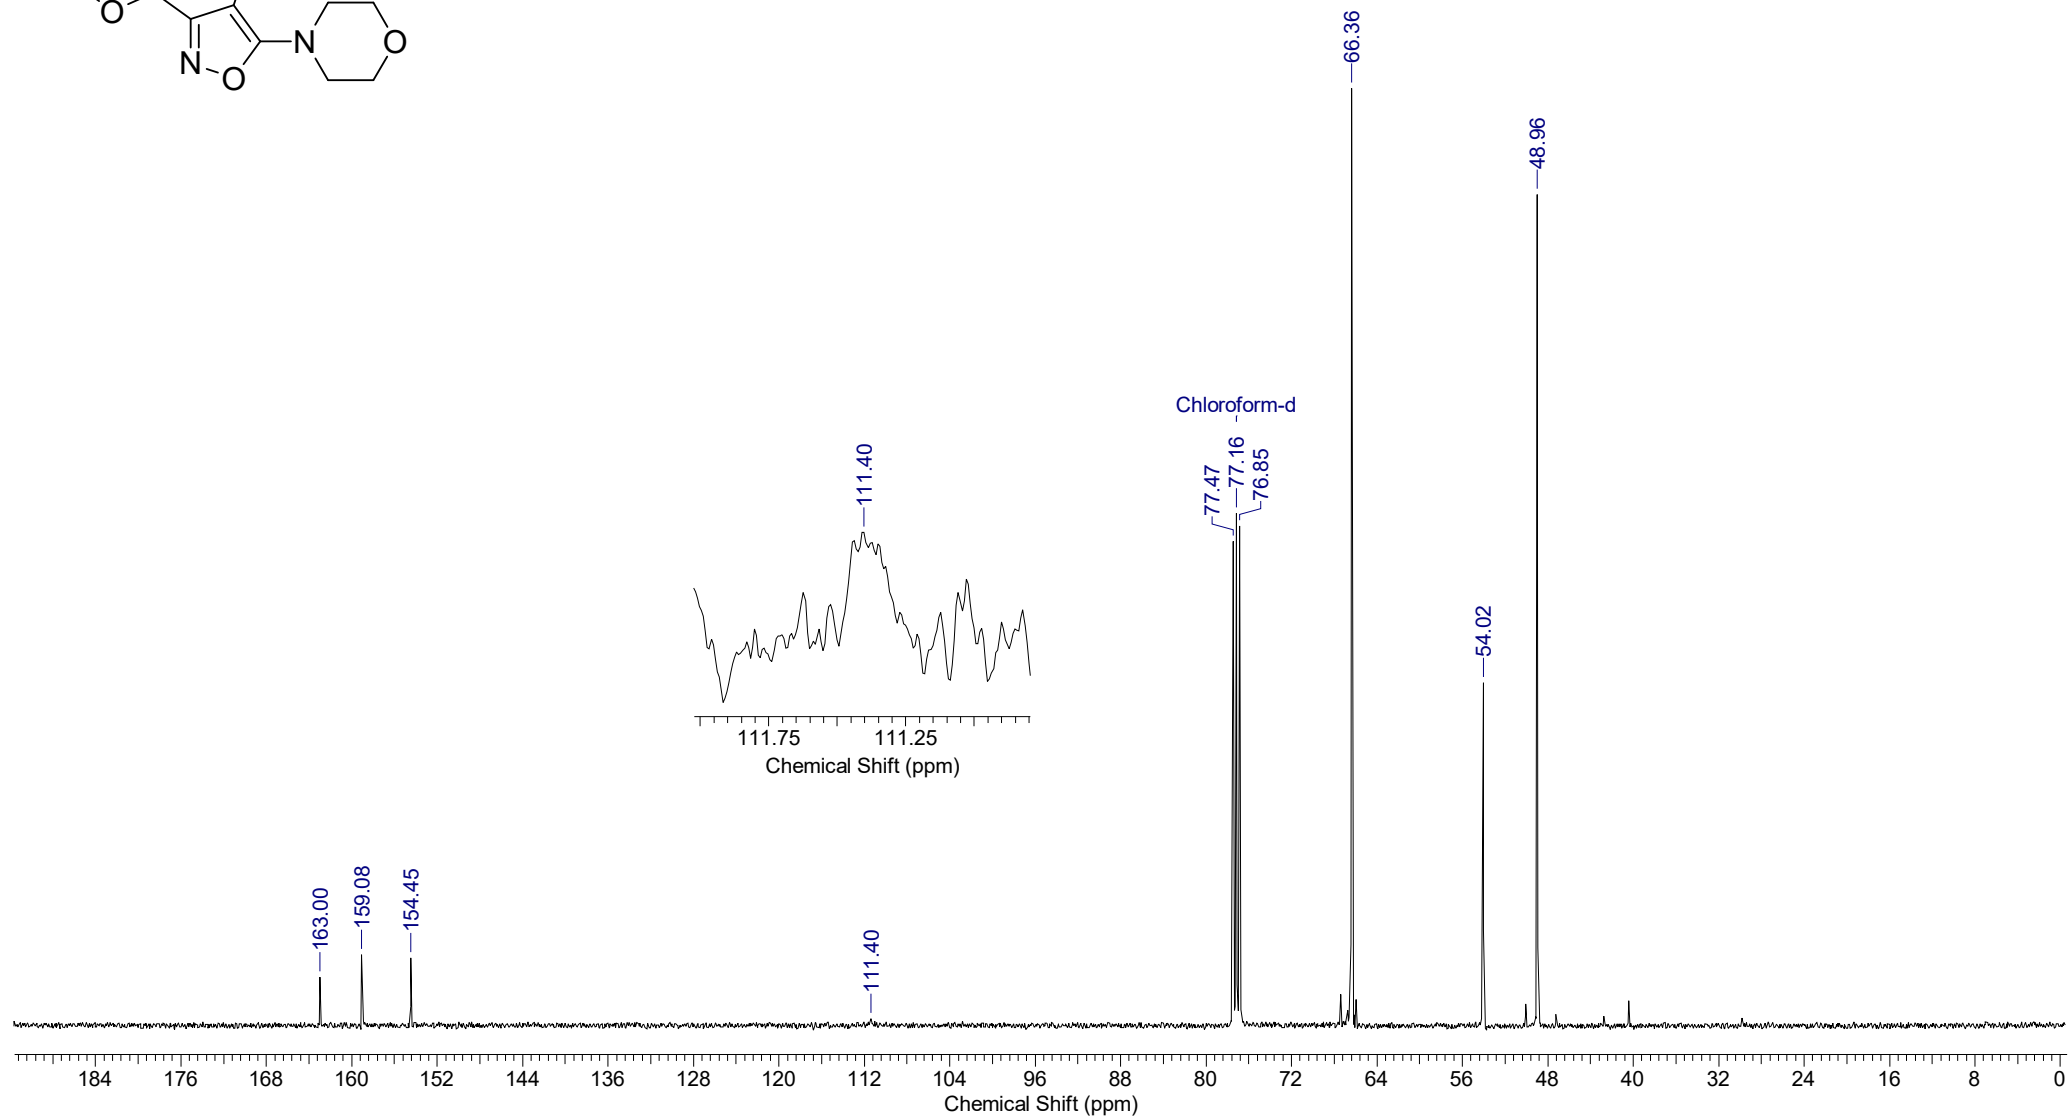

# Methyl 5-morpholino-4-nitroisoxazole-3-carboxylate **6** (HMBC)

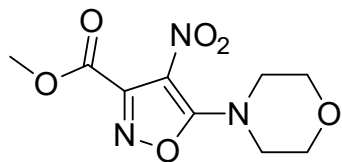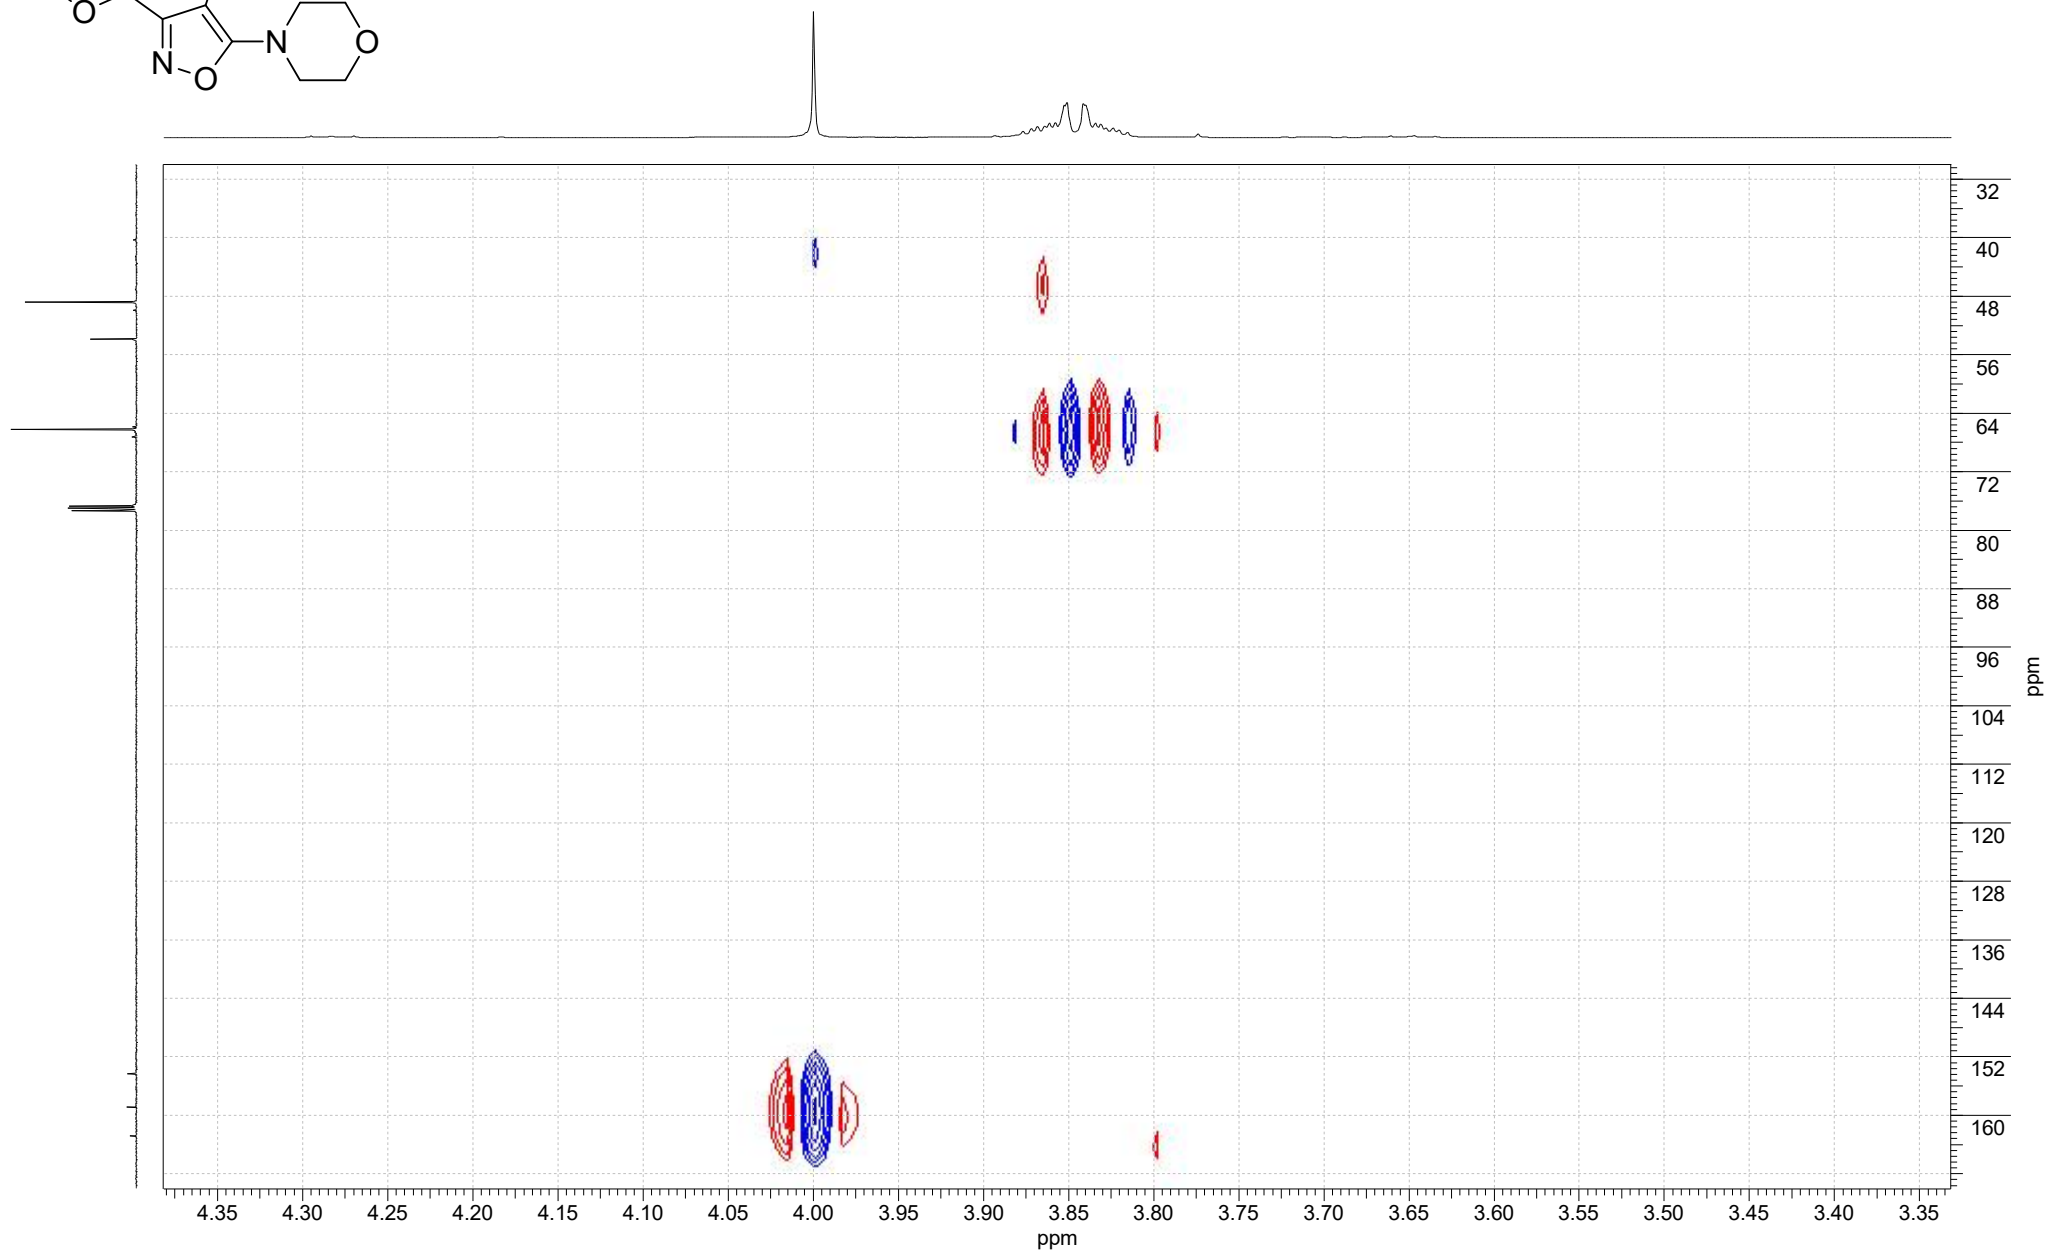

(5-Morpholinoisoxazol-3-yl)methanol **7** ( $^1\text{H}$  NMR)

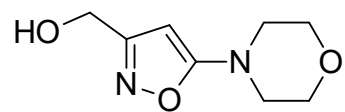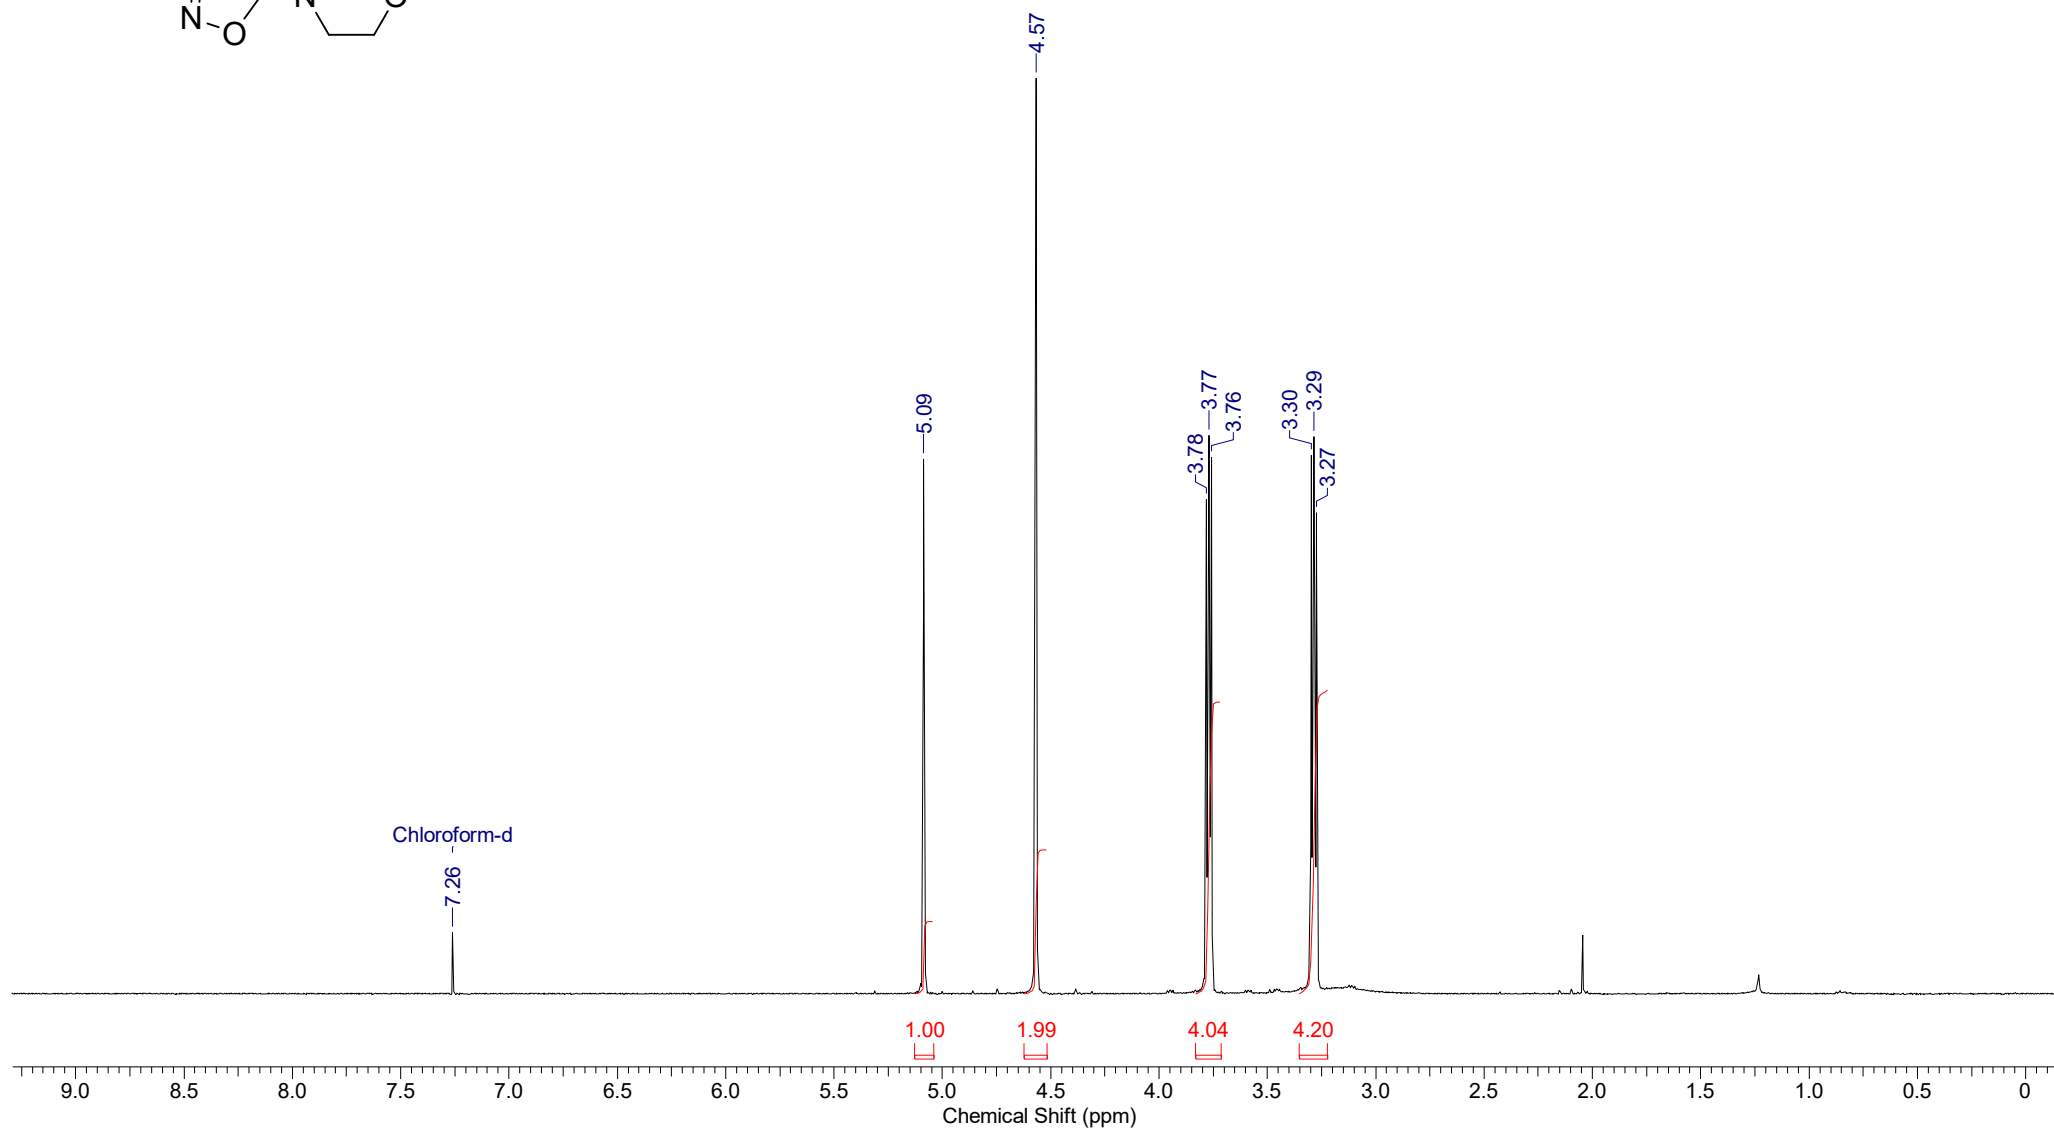

(5-Morpholinoisoxazol-3-yl)methanol **7** ( $^{13}\text{C}$  NMR)

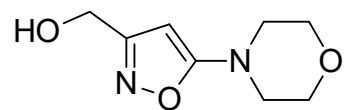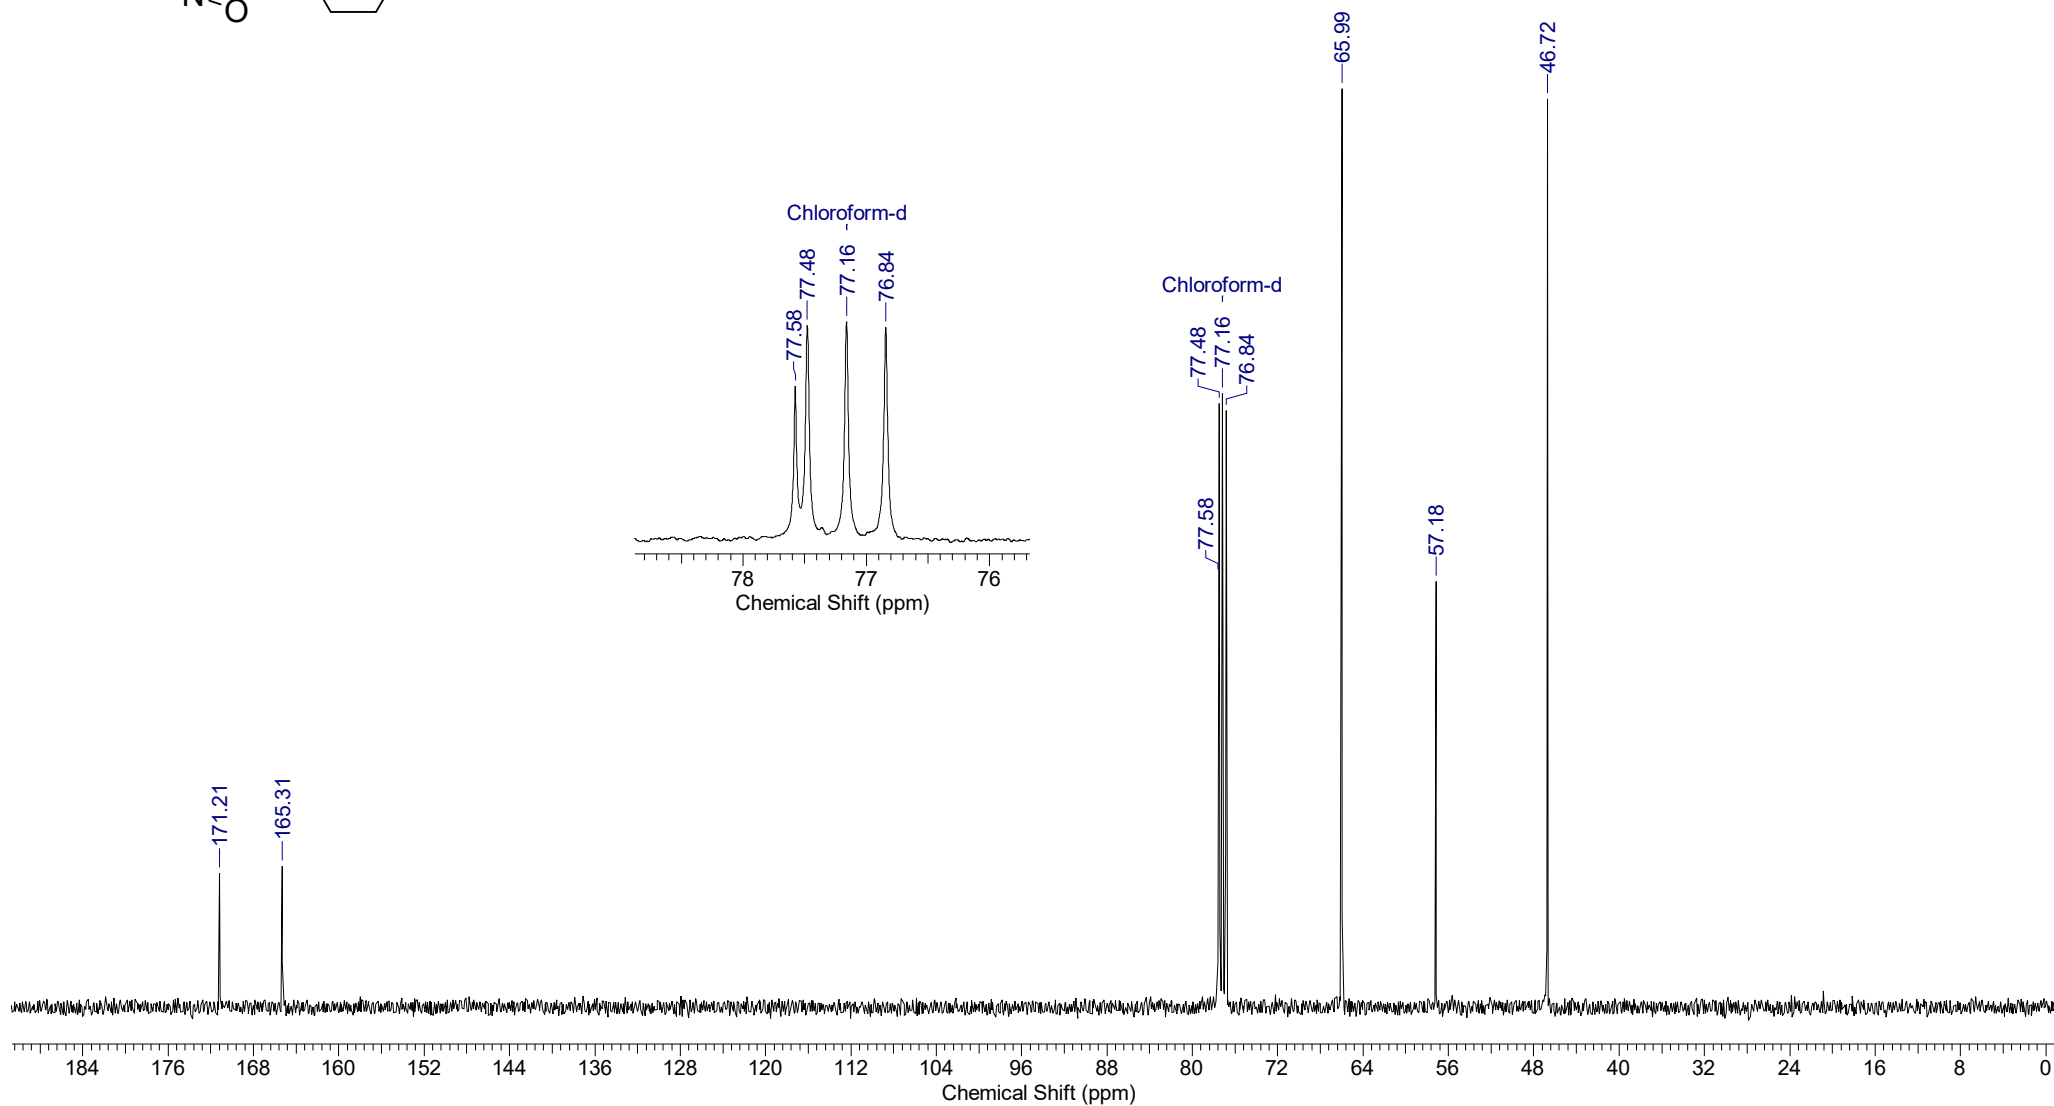

# (5-Morpholinoisoxazol-3-yl)methanol **7** (APT)

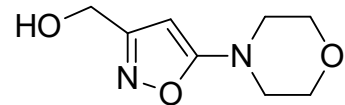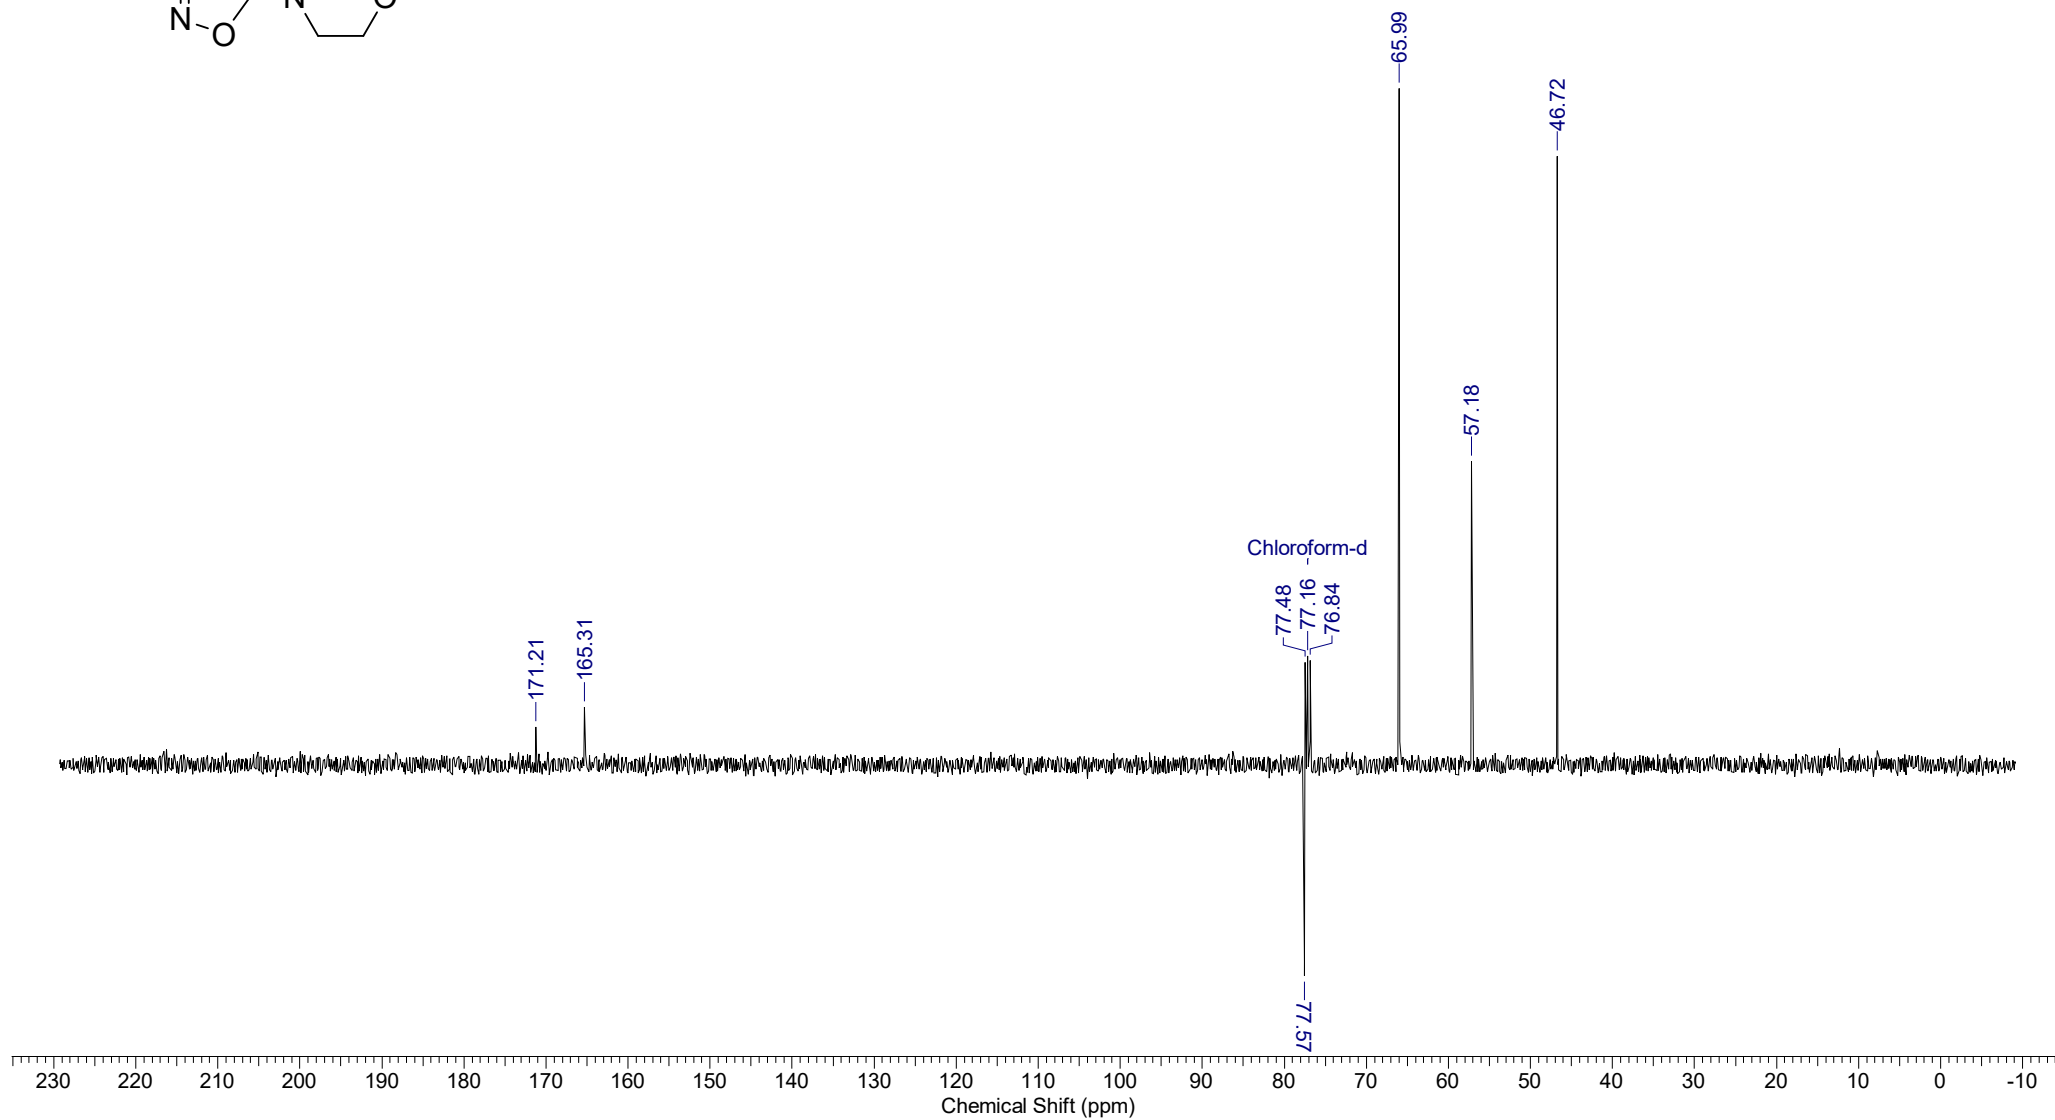



# Methyl 5-[[1-(1-adamanty)ethyl]amino]isoxazole-3-carboxylate **9** ( $^1\text{H}$ NMR)

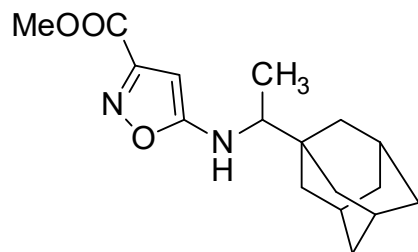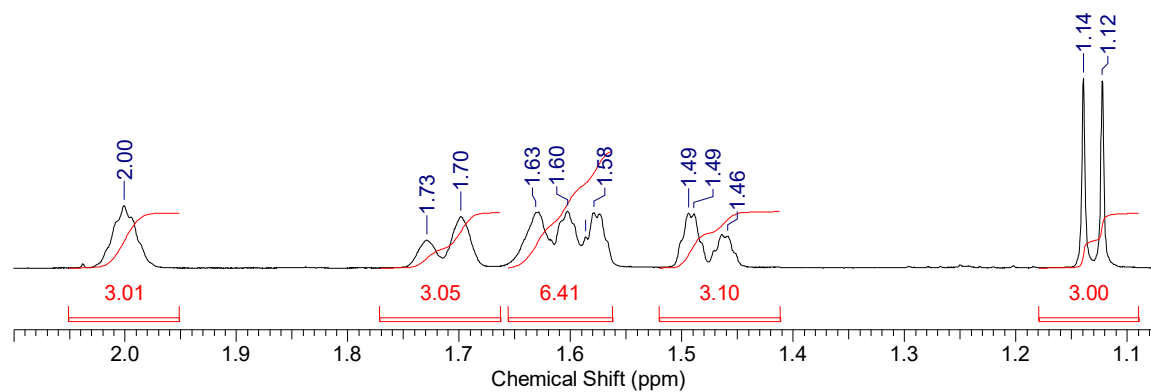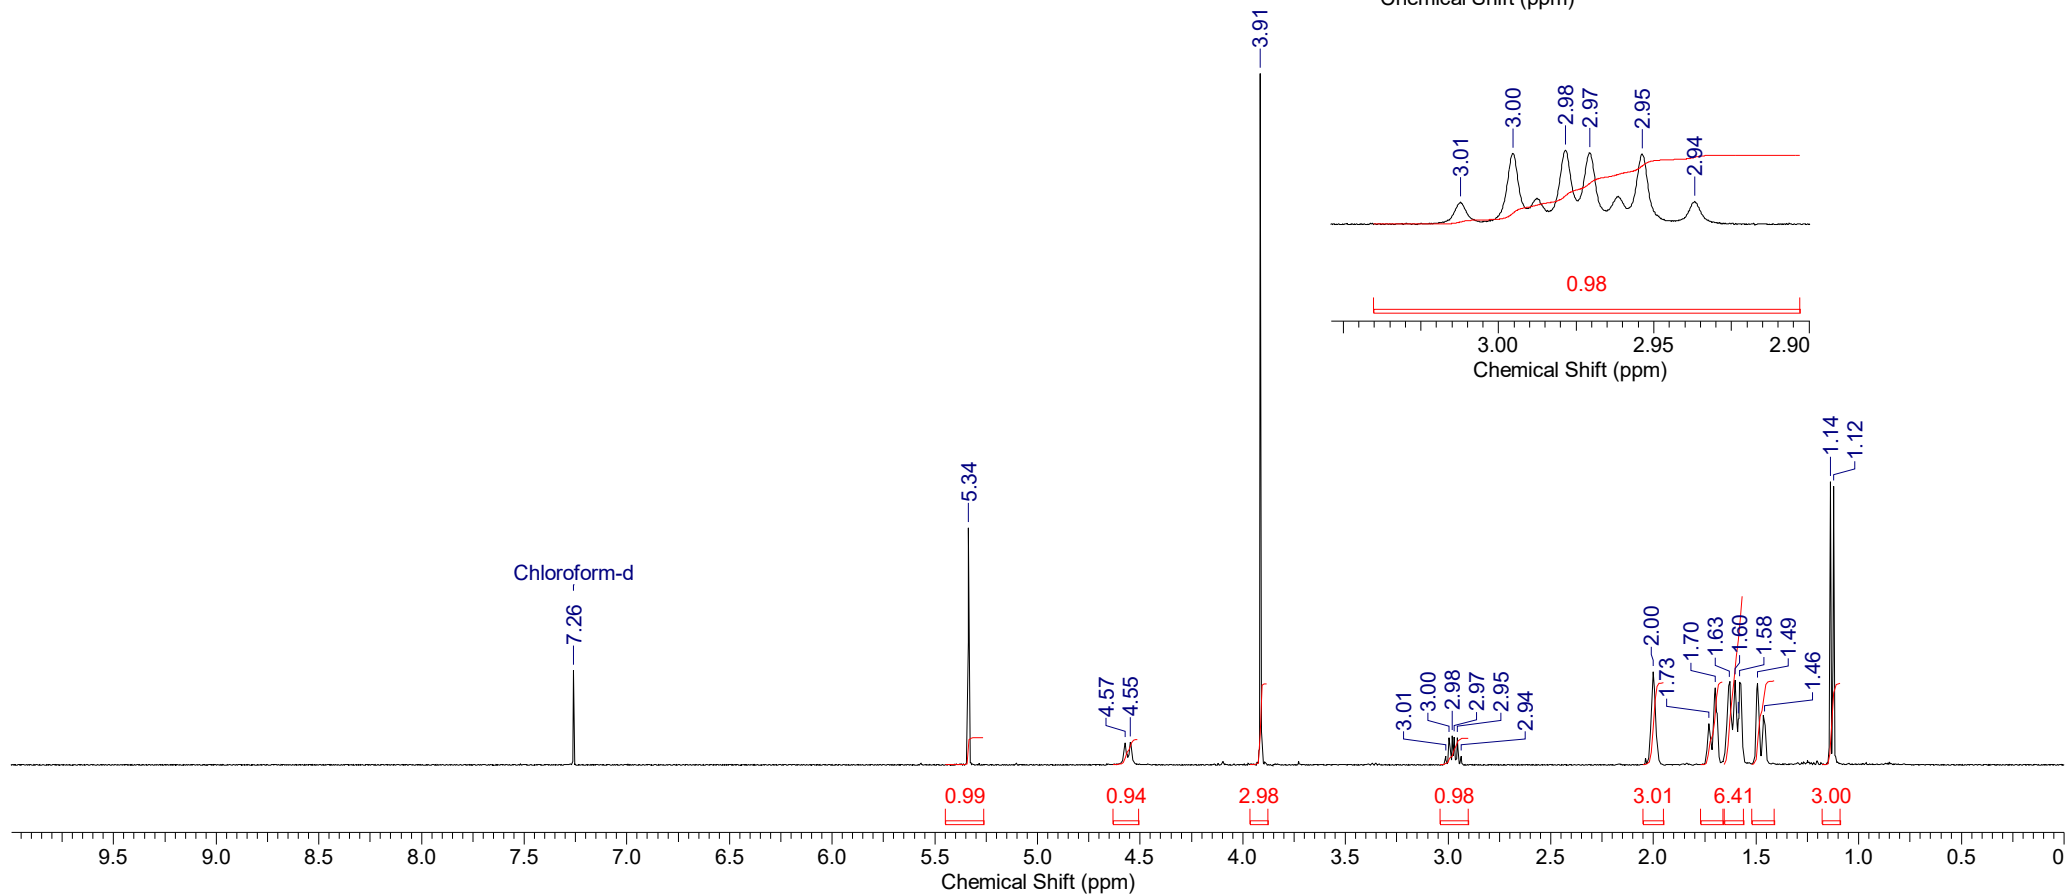

# Methyl 5-[[1-(1-adamantyl)ethyl]amino]isoxazole-3-carboxylate **9** (<sup>13</sup>C NMR)

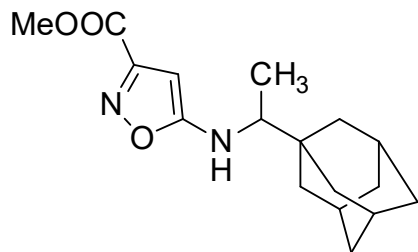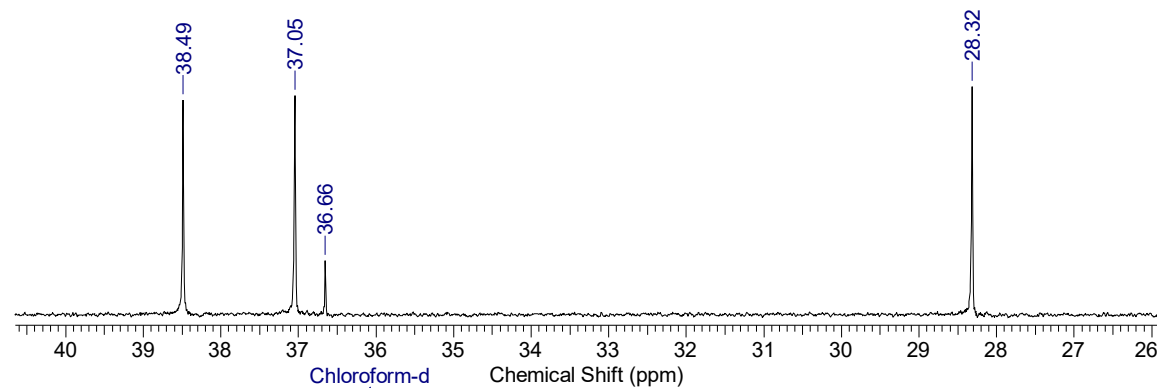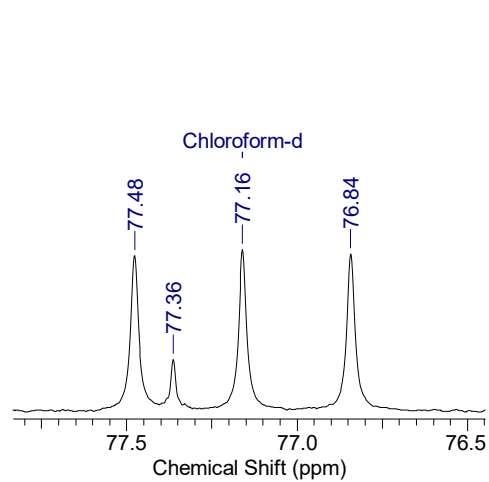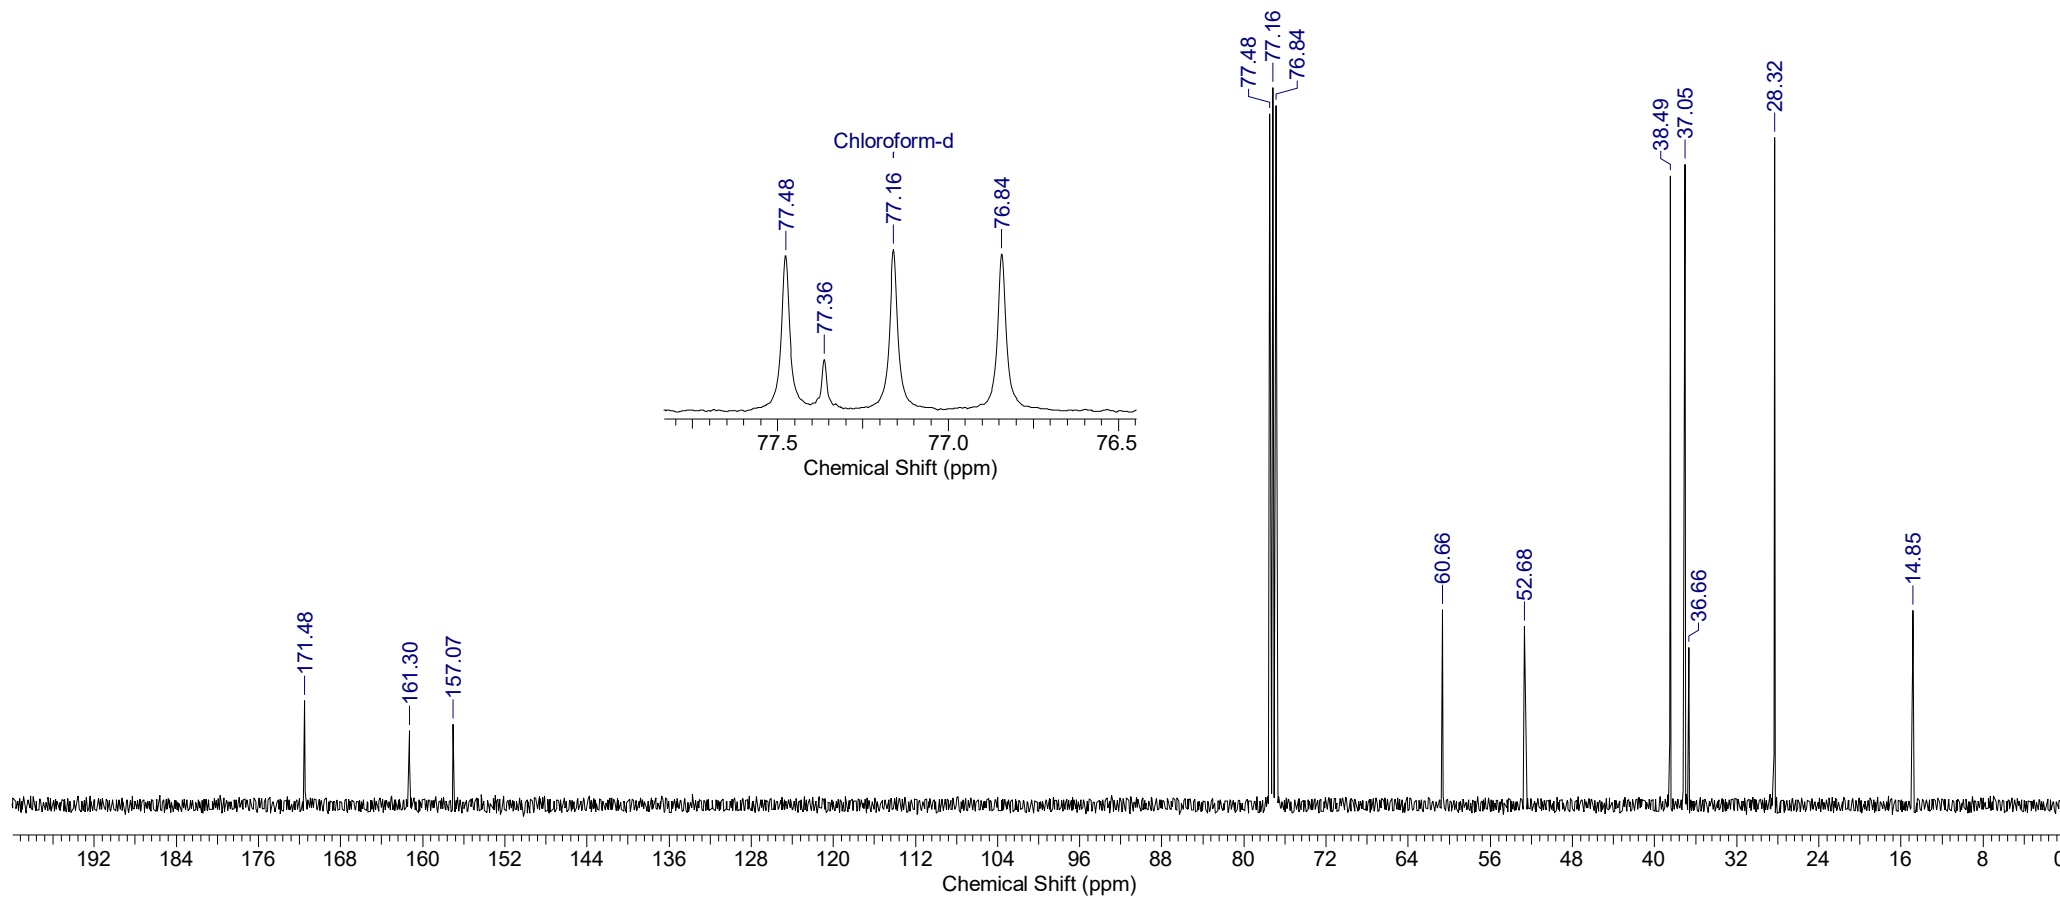

Methyl 5-(((8R,9S,13S,14S,17R)-17-ethynyl-17-hydroxy-13-methyl-7,8,9,11,12,13,14,15,16,17-decahydro-6H-cyclopenta[a]phenanthren-3-yl)oxy)isoxazole-3-carboxylate **11** (<sup>1</sup>H NMR)

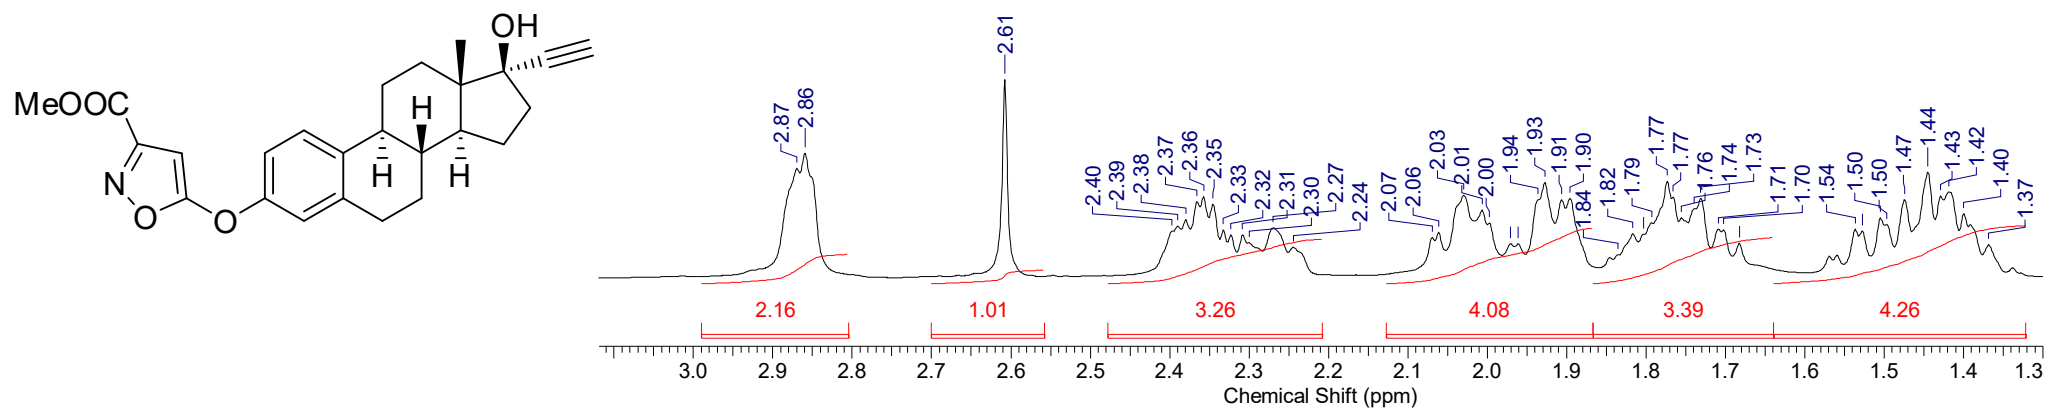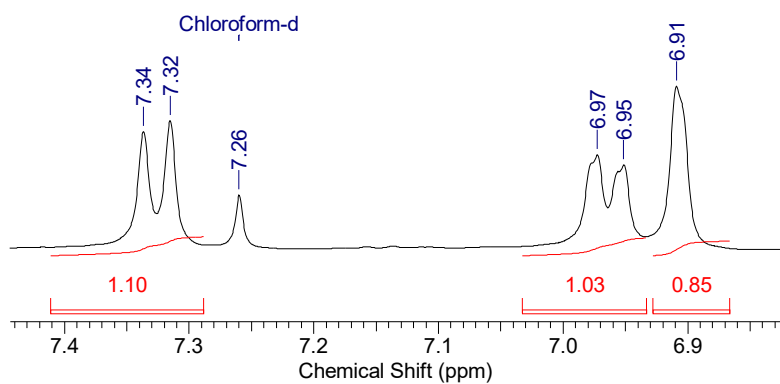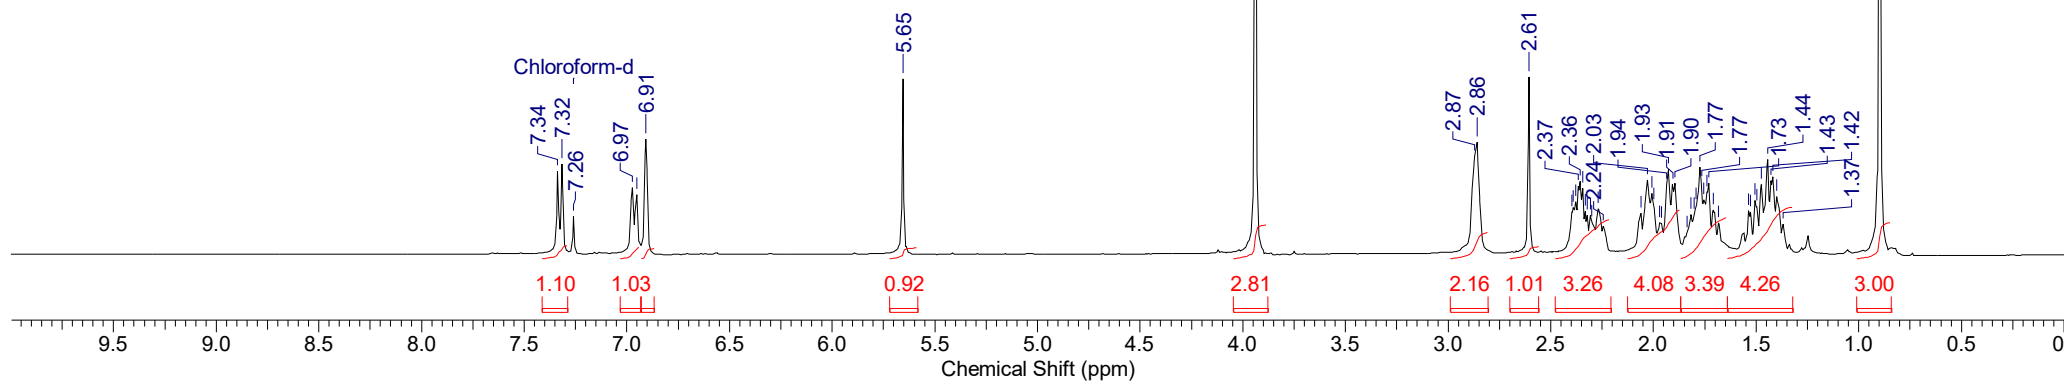

Methyl 5-(((8R,9S,13S,14S,17R)-17-ethynyl-17-hydroxy-13-methyl-7,8,9,11,12,13,14,15,16,17-decahydro-6H-cyclopenta[a]phenanthren-3-yl)oxy)isoxazole-3-carboxylate **11** ( $^{13}\text{C}$  NMR)

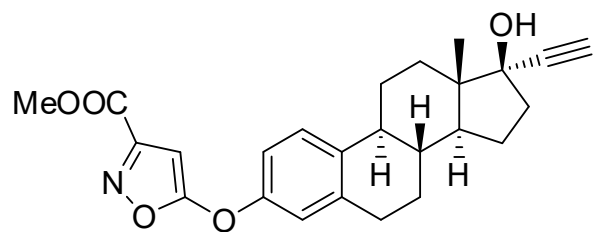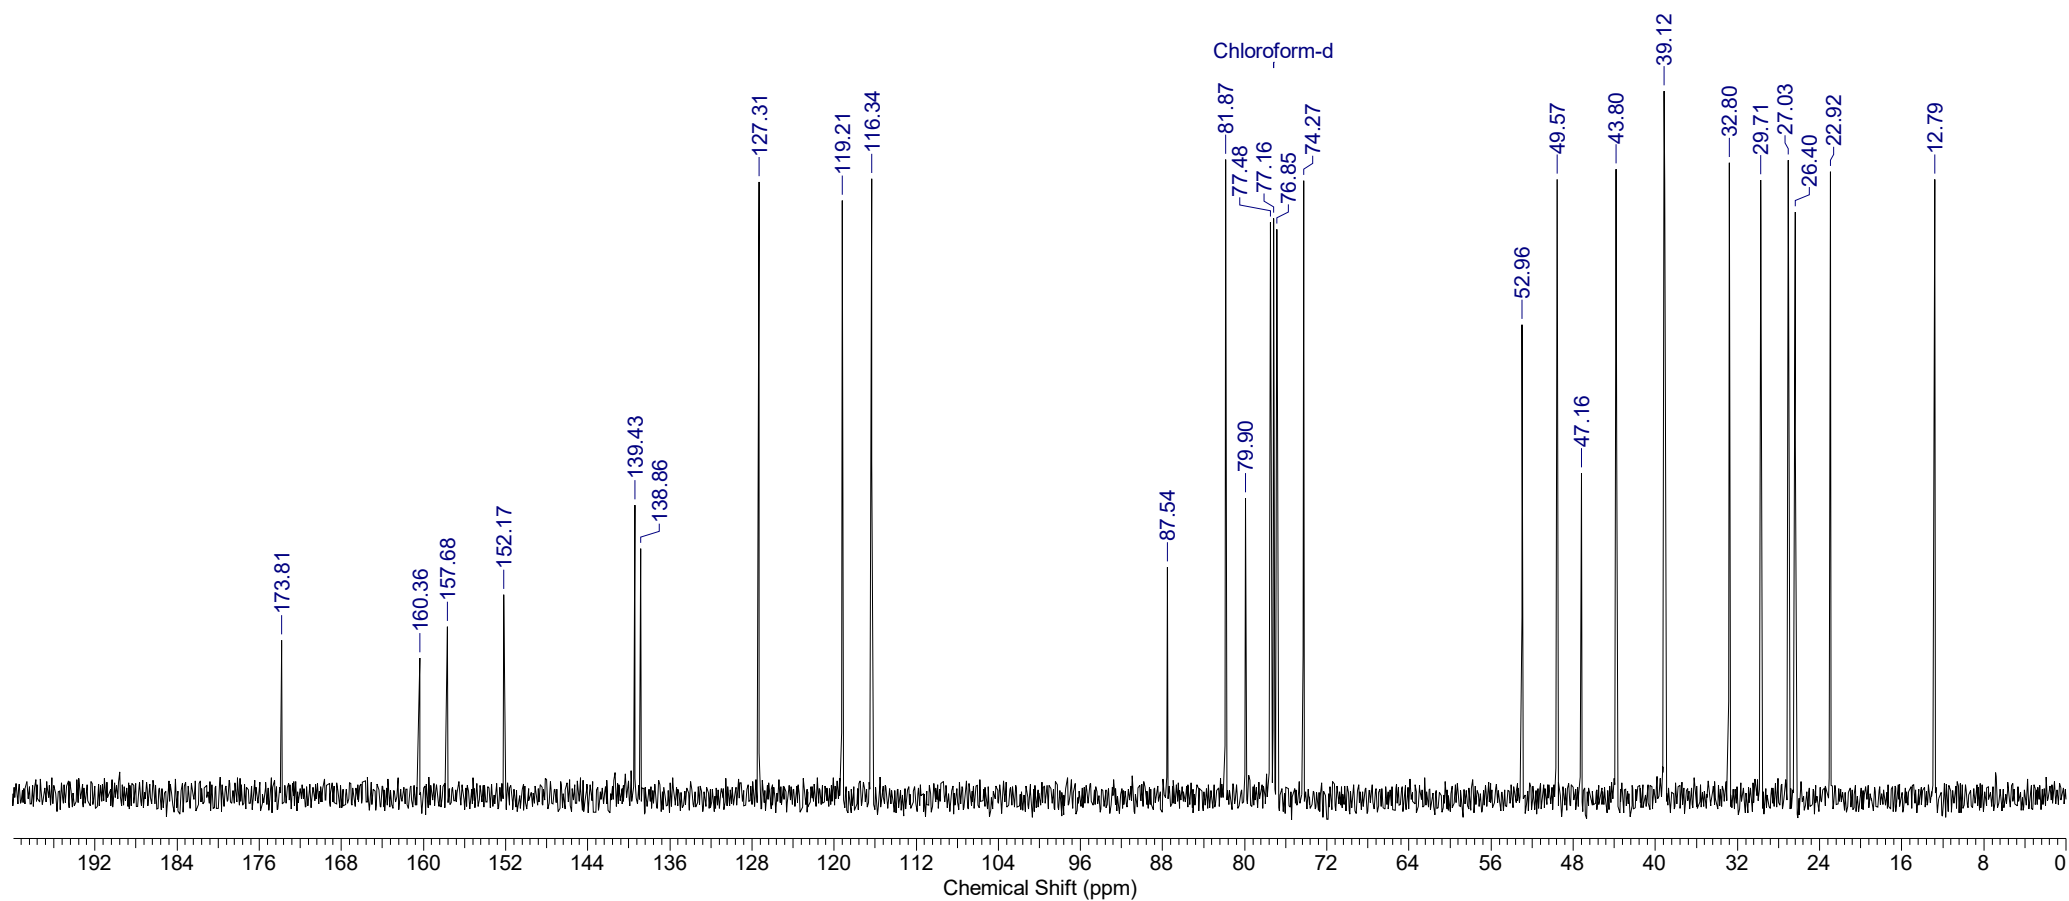

Methyl 5-(((8R,9S,13S,14S,17R)-17-ethynyl-17-hydroxy-13-methyl-7,8,9,11,12,13,14,15,16,17-decahydro-6H-cyclopenta[a]phenanthren-3-yl)oxy)isoxazole-3-carboxylate **11** (HSQC)

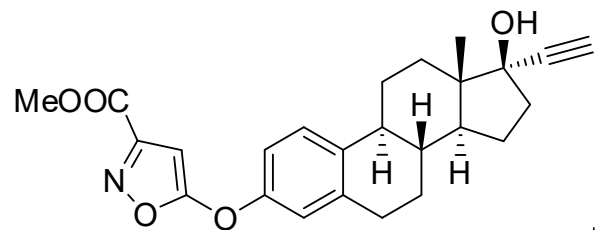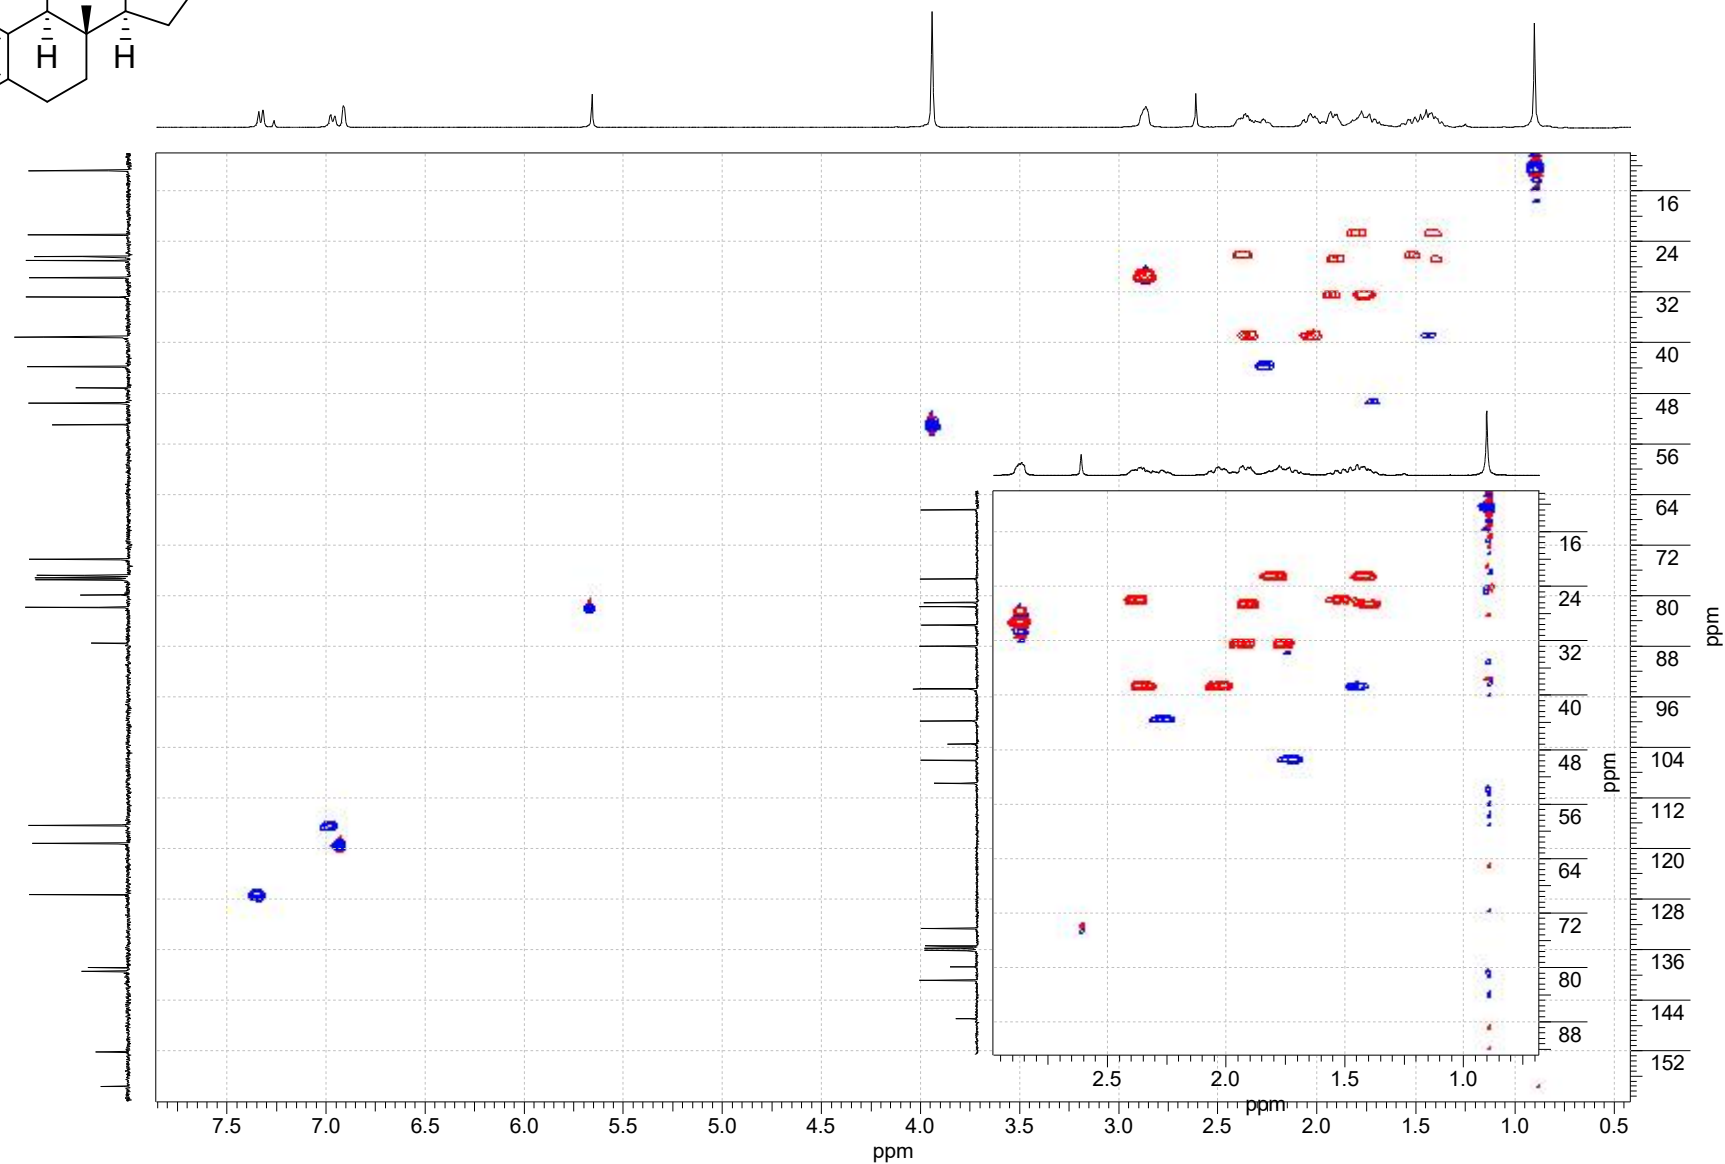

Methyl 5-(((8R,9S,13S,14S,17R)-17-ethynyl-17-hydroxy-13-methyl-7,8,9,11,12,13,14,15,16,17-decahydro-6H-cyclopenta[a]phenanthren-3-yl)oxy)isoxazole-3-carboxylate **11** (HMBC)

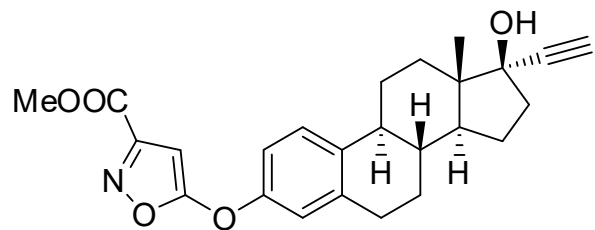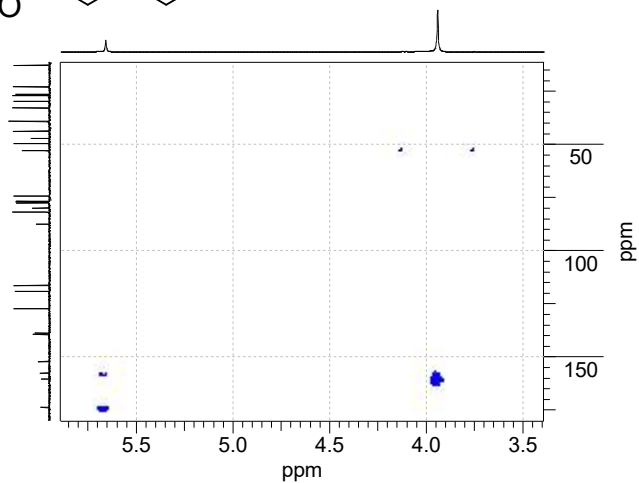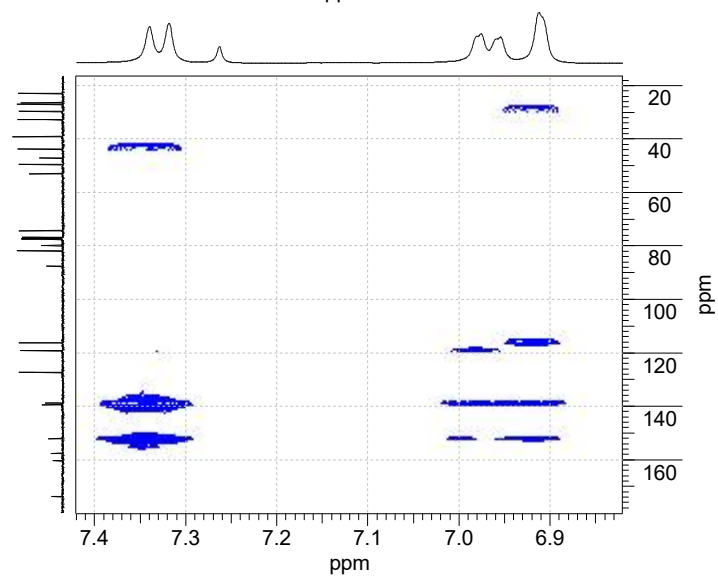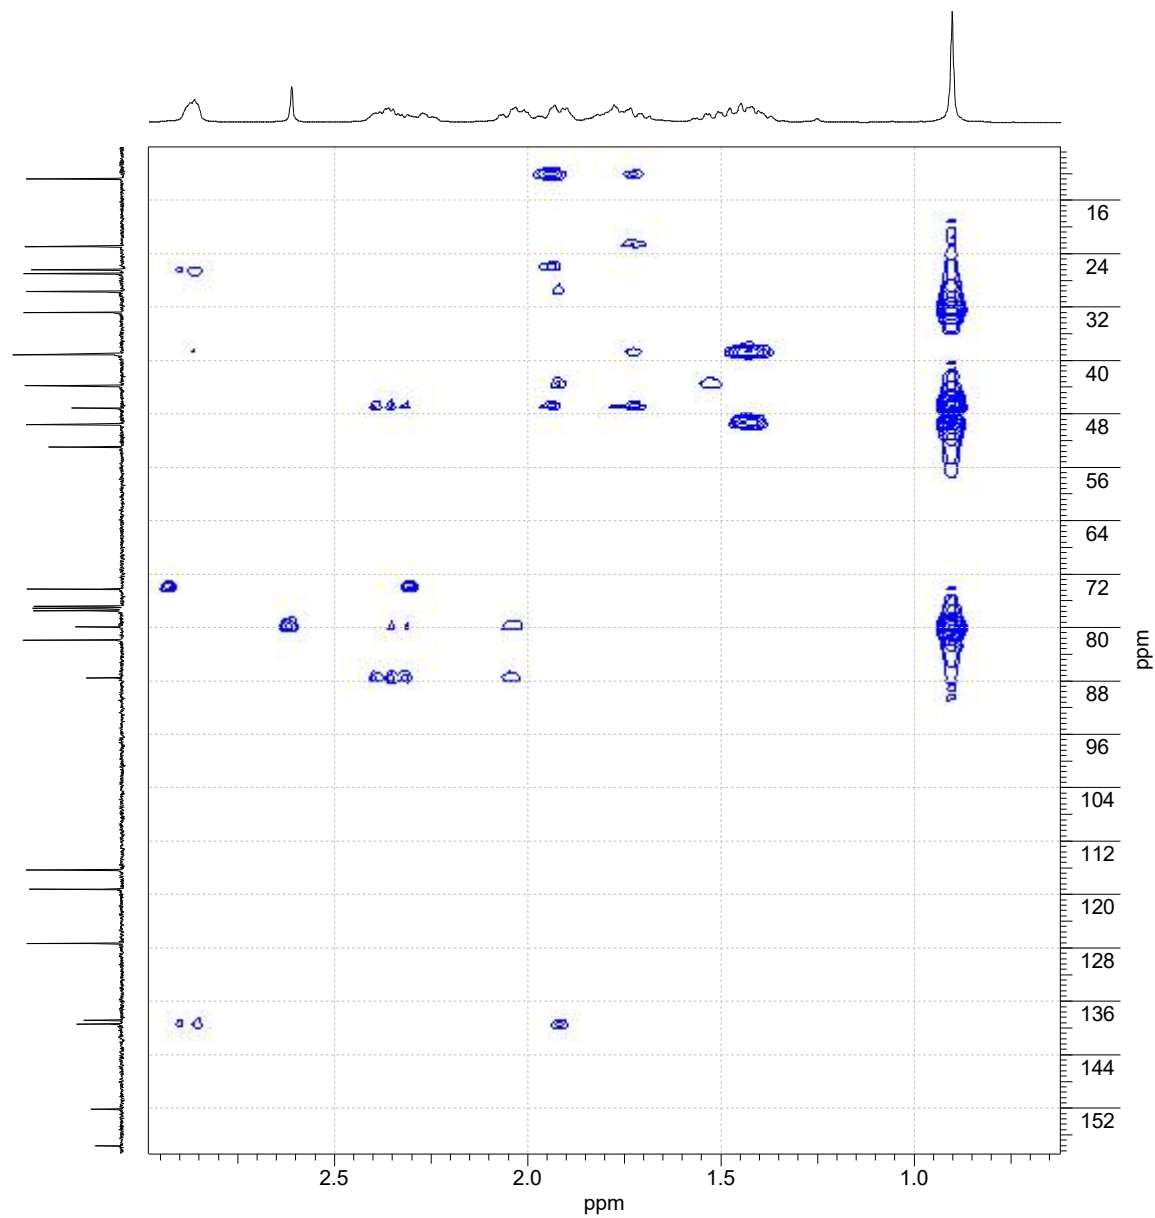

Supplement: d1ob00816a2.pdf [file d1ob00816a2.pdf]
